# Supplementary material for: miR-281-x Regulates Self-Grooming Behavior in Honeybees via Octopamine Signaling
Source: Research Square preprint supplement (doi:10.21203/rs.3.rs-6212055/v1), 2025-03-31
Supplement: Supplementary file 1 [file 436e0ca7df1770406b1e47ed.xlsx]

## Sheet: miR-281-x
miRNA	target	target_start	target_end	energy(kcal/mol)	target_region(3'->5')	mirna-target_pairing(5'->3')	miRNA_sequence(5'->3')	Symbol	Description	KEGG_A_class	KEGG_B_class	Pathway	K_ID	GO Component	GO Function	GO Process
miR-281-x	NM_001011629.1	9047	9068	-14.73	cTCTCTCGAGACGTTTCTTTag	x||||||||x|x||xx||x|xx	aAGAGAGCTATCCATCGACAgt	Mblk-1	XP_006563386.2 mushroom body large-type Kenyon cell-specific protein 1 isoform X1 [Apis mellifera]	Cellular Processes	Cell growth and death	ko04214//Apoptosis - fly	K20015	-	GO:0003677//DNA binding	-
miR-281-x	NM_001011654.2	79	100	-20.53	tTCTCTCGGCGGAAGGCgacag	x|||||||:x:|xx:||xxxxx	aAGAGAGCTATCCATCGacagt	TpnC47D	NP_001011654.1 troponin C type IIb [Apis mellifera]	Human Diseases;Human Diseases;Environmental Information Processing;Organismal Systems;Environmental Information Processing;Organismal Systems;Environmental Information Processing;Organismal Systems;Environmental Information Processing;Organismal Systems;Human Diseases;Organismal Systems;Organismal Systems;Environmental Information Processing;Human Diseases;Organismal Systems;Organismal Systems;Ce…	Cancers;Neurodegenerative diseases;Signal transduction;Circulatory system;Signal transduction;Nervous system;Signal transduction;Endocrine system;Signal transduction;Endocrine system;Infectious diseases;Endocrine system;Nervous system;Signal transduction;Infectious disease: viral;Endocrine system;Circulatory system;Cell growth and death;Cell growth and death;Environmental adaptation;Endocrine sys…	ko05200//Pathways in cancer;ko05010//Alzheimer disease;ko04024//cAMP signaling pathway;ko04261//Adrenergic signaling in cardiomyocytes;ko04020//Calcium signaling pathway;ko04728//Dopaminergic synapse;ko04022//cGMP - PKG signaling pathway;ko04921//Oxytocin signaling pathway;ko04014//Ras signaling pathway;ko04922//Glucagon signaling pathway;ko05163//Human cytomegalovirus infection;ko04910//Insulin …	K02183;K02183;K02183;K02183;K02183;K02183;K02183;K02183;K02183;K02183;K02183;K02183;K02183;K02183;K02183;K02183;K02183;K02183;K02183;K02183;K02183;K02183;K02183;K02183;K02183;K02183;K02183;K02183;K02183;K02183;K02183;K02183;K02183;K02183;K02183;K02183;K02183;K02183;K02183;K02183;K02183	-	GO:0005509//calcium ion binding;GO:0005515//protein binding	-
miR-281-x	NM_001097154.2	544	565	-13.17	cTCTCTCGAAAccctttgatct	x||||||||x|xxxxxxxxxxx	aAGAGAGCTATccatcgacagt	Tpi	NP_001090623.1 triosephosphate isomerase [Apis mellifera]	Metabolism;Metabolism;Metabolism;Metabolism;Metabolism;Metabolism	Global and overview maps;Global and overview maps;Carbohydrate metabolism;Carbohydrate metabolism;Global and overview maps;Carbohydrate metabolism	ko01100//Metabolic pathways;ko01200//Carbon metabolism;ko00562//Inositol phosphate metabolism;ko00010//Glycolysis / Gluconeogenesis;ko01230//Biosynthesis of amino acids;ko00051//Fructose and mannose metabolism	K01803;K01803;K01803;K01803;K01803;K01803	GO:0005840//ribosome	GO:0003735//structural constituent of ribosome;GO:0004807//triose-phosphate isomerase activity	GO:0006096//glycolytic process;GO:0006412//translation
miR-281-x	NM_001134936.1	4	25	-16.77	tTCTCTCGGAAAGCGGTTCTtt	x|||||||:x|x|x:|:|x|xx	aAGAGAGCTATCCATCGACAgt	dsx	NP_001128408.1 doublesex isoform B [Apis mellifera]	-	-	-	-	-	GO:0043565//sequence-specific DNA binding	GO:0006355//regulation of transcription, DNA-templated
miR-281-x	NM_001145738.1	129	150	-12.18	tTCTCTCGTTTATTAACAGTaa	x|||||||x|xxx||x|x||xx	aAGAGAGCTATCCATCGACAgt	DAT	XP_016767131.1 dopamine transporter isoform X1 [Apis mellifera]	Organismal Systems;Organismal Systems;Human Diseases;Human Diseases;Human Diseases;Human Diseases	Nervous system;Nervous system;Substance dependence;Substance dependence;Neurodegenerative diseases;Substance dependence	ko04728//Dopaminergic synapse;ko04721//Synaptic vesicle cycle;ko05031//Amphetamine addiction;ko05034//Alcoholism;ko05012//Parkinson disease;ko05030//Cocaine addiction	K05036;K05036;K05036;K05036;K05036;K05036	GO:0016021//integral component of membrane	-	-
miR-281-x	NM_001177490.1	270	290	-14.11	cTCTCTCG-TGGTTttatagaa	x|||||||x|:|x|xxxxxxxx	aAGAGAGCTATCCAtcgacagt	cytC	NP_001170961.1 cytochrome c [Apis mellifera]	Human Diseases;Human Diseases;Human Diseases;Human Diseases;Human Diseases;Human Diseases;Human Diseases;Human Diseases;Human Diseases;Human Diseases;Human Diseases;Human Diseases;Human Diseases;Human Diseases;Human Diseases;Human Diseases;Human Diseases;Human Diseases;Cellular Processes;Human Diseases;Cellular Processes;Human Diseases;Human Diseases;Human Diseases;Human Diseases;Human Diseases;H…	Cancers;Neurodegenerative diseases;Neurodegenerative diseases;Infectious diseases;Infectious diseases;Infectious diseases;Infectious diseases;Infectious disease: viral;Infectious diseases;Endocrine and metabolic diseases;Infectious diseases;Infectious diseases;Neurodegenerative diseases;Cancers;Infectious diseases;Cancers;Infectious diseases;Infectious diseases;Cell growth and death;Infectious di…	ko05200//Pathways in cancer;ko05010//Alzheimer disease;ko05016//Huntington disease;ko05131//Shigellosis;ko05132//Salmonella infection;ko05163//Human cytomegalovirus infection;ko05168//Herpes simplex infection;ko05170//Human immunodeficiency virus 1 infection;ko05130//Pathogenic Escherichia coli infection;ko04932//Non-alcoholic fatty liver disease (NAFLD);ko05152//Tuberculosis;ko05167//Kaposi sarc…	K08738;K08738;K08738;K08738;K08738;K08738;K08738;K08738;K08738;K08738;K08738;K08738;K08738;K08738;K08738;K08738;K08738;K08738;K08738;K08738;K08738;K08738;K08738;K08738;K08738;K08738;K08738;K08738;K08738	GO:0009523//photosystem II;GO:0009538//photosystem I reaction center;GO:0009654//photosystem II oxygen evolving complex;GO:0042597//periplasmic space;GO:0070069//cytochrome complex	GO:0004129//cytochrome-c oxidase activity;GO:0009055//electron carrier activity;GO:0010242//oxygen evolving activity;GO:0020037//heme binding	GO:0015979//photosynthesis;GO:0046170//methanol catabolic process;GO:0055114//oxidation-reduction process
miR-281-x	NM_001256040.1	4190	4210	-15.5	tTCTCTCGC-AGGAAaaaaaaa	x|||||||xx|||x|xxxxxxx	aAGAGAGCTATCCATcgacagt	Erc2	NP_001242969.2 uncharacterized protein LOC100859932 [Apis mellifera]	-	-	-	-	GO:0031514//motile cilium	GO:0005524//ATP binding	GO:0007059//chromosome segregation;GO:0030261//chromosome condensation;GO:0048870//cell motility
miR-281-x	XM_001119931.5	507	528	-13.41	tTCTCTCGccaatctttgcatg	x|||||||xxxxxxxxxxxxxx	aAGAGAGCtatccatcgacagt	--	XP_001119931.1 uncharacterized protein LOC724178 [Apis mellifera]	-	-	-	-	-	-	-
miR-281-x	XM_001120025.5	394	415	-14.13	tTCTCTCGTAATGTtaaaaatc	x|||||||xx|x||xxxxxxxx	aAGAGAGCTATCCAtcgacagt	rab7	XP_001120025.2 ras-related protein Rab-7a [Apis mellifera]	Cellular Processes;Human Diseases;Cellular Processes;Human Diseases;Cellular Processes;Human Diseases;Cellular Processes	Transport and catabolism;Infectious diseases;Transport and catabolism;Infectious diseases;Transport and catabolism;Infectious diseases;Transport and catabolism	ko04144//Endocytosis;ko05132//Salmonella infection;ko04140//Autophagy - animal;ko05152//Tuberculosis;ko04145//Phagosome;ko05146//Amoebiasis;ko04137//Mitophagy - animal	K07897;K07897;K07897;K07897;K07897;K07897;K07897	GO:0005737//cytoplasm	GO:0003723//RNA binding;GO:0003724//RNA helicase activity;GO:0003743//translation initiation factor activity;GO:0003924//GTPase activity;GO:0005524//ATP binding;GO:0005525//GTP binding;GO:0016887//ATPase activity;GO:0017111//nucleoside-triphosphatase activity;GO:0019001//guanyl nucleotide binding;GO:0019843//rRNA binding;GO:0031683//G-protein beta/gamma-subunit complex binding;GO:0043022//ribosom…	GO:0006400//tRNA modification;GO:0006412//translation;GO:0006413//translational initiation;GO:0006576//cellular biogenic amine metabolic process;GO:0007186//G-protein coupled receptor signaling pathway;GO:0042254//ribosome biogenesis;GO:0046336//ethanolamine catabolic process;GO:0051186//cofactor metabolic process
miR-281-x	XM_001120198.5	797	818	-20.8	tTCTCTCGTTAT-TATGCTGTgc	x|||||||x||xx||x|||||xx	aAGAGAGCTATCCAT-CGACAgt	lolal	XP_001120198.1 longitudinals lacking protein-like [Apis mellifera]	-	-	-	-	-	GO:0003674//molecular_function;GO:0005515//protein binding;GO:0016869//intramolecular transferase activity, transferring amino groups;GO:0030170//pyridoxal phosphate binding;GO:0050066//lysine 2,3-aminomutase activity;GO:0051539//4 iron, 4 sulfur cluster binding;GO:0070283//radical SAM enzyme activity	GO:0006525//arginine metabolic process;GO:0006536//glutamate metabolic process;GO:0030436//asexual sporulation;GO:0046440//L-lysine metabolic process
miR-281-x	XM_001120276.5	1356	1377	-14.7	cTCTCTCGTGCGTTTGCTcata	x|||||||xxx|x|x|||xxxx	aAGAGAGCTATCCATCGAcagt	pnr	XP_001120276.2 transcription factor stalky [Apis mellifera]	-	-	-	-	GO:0005634//nucleus	GO:0008270//zinc ion binding;GO:0043565//sequence-specific DNA binding	GO:0006355//regulation of transcription, DNA-templated
miR-281-x	XM_001120618.5	140	164	-22.08	tTCTCTCGCACTATTGGAGCTGgct	x|||||||x|x||xx|x|||||xxx	aAGAGAGC-T-ATC-CATCGACagt	PKNOX2	XP_001120618.1 homeobox protein PKNOX2 isoform X1 [Apis mellifera]	-	-	-	-	-	GO:0003677//DNA binding	GO:0006355//regulation of transcription, DNA-templated
miR-281-x	XM_001120785.5	1410	1431	-15.54	tTCTCTCGGTCCGCTCCTTTag	x|||||||:|xx|xxx||x|xx	aAGAGAGCTATCCATCGACAgt	znf395	XP_001120785.2 zinc finger protein 395 isoform X1 [Apis mellifera]	-	-	-	-	-	-	-
miR-281-x	XM_001120829.5	781	803	-19.98	tTCTCTCGATTTGGTcacgaagc	x|||||||||xx|||xxxxxxxx	aAGAGAGCTAT-CCAtcgacagt	trc	XP_001120829.2 serine/threonine-protein kinase tricorner isoform X2 [Apis mellifera]	-	-	-	-	-	GO:0004672//protein kinase activity;GO:0004674//protein serine/threonine kinase activity;GO:0005524//ATP binding;GO:0016709//oxidoreductase activity, acting on paired donors, with incorporation or reduction of molecular oxygen, NAD(P)H as one donor, and incorporation of one atom of oxygen	GO:0006468//protein phosphorylation;GO:0006744//ubiquinone biosynthetic process
miR-281-x	XM_001120972.5	533	554	-15.43	tTCTCTCGCTGtttttatattt	x|||||||x|:xxxxxxxxxxx	aAGAGAGCTATccatcgacagt	--	XP_001120972.2 uncharacterized protein LOC725082 isoform X1 [Apis mellifera]	-	-	-	-	-	-	-
miR-281-x	XM_001121135.5	1190	1211	-17.45	gTCTCTCGAGCGTGCA-CTGgat	x||||||||xx|x|x|x|||xxx	aAGAGAGCTATC-CATCGACagt	TP53INP2	XP_006568121.2 tumor protein p53-inducible nuclear protein 2 isoform X1 [Apis mellifera]	Cellular Processes	Transport and catabolism	ko04140//Autophagy - animal	K21247	-	-	-
miR-281-x	XM_001121418.5	168	187	-10.15	cTCTCTCG-T-GATAACTTTat	x|||||||x|x|x||x||x|xx	aAGAGAGCTATCCATCGACAgt	PTAR1	XP_001121418.2 protein prenyltransferase alpha subunit repeat-containing protein 1 [Apis mellifera]	-	-	-	-	-	GO:0008318//protein prenyltransferase activity	GO:0018342//protein prenylation
miR-281-x	XM_001121449.5	14	35	-15.56	tTCTCTCGCTCG-TACCTCGTtt	x|||||||x|x|x||x||x||xx	aAGAGAGCTATCCATCGA-CAgt	--	XP_001121449.1 uncharacterized protein LOC725622 [Apis mellifera]	-	-	-	-	-	-	-
miR-281-x	XM_001121463.5	1577	1598	-11.69	cTCTCTCGCTCTCTCTCTCTca	x|||||||x|xxx|xx||x|xx	aAGAGAGCTATCCATCGACAgt	--	XP_006567531.1 uncharacterized protein LOC725634 isoform X1 [Apis mellifera]	-	-	-	-	-	GO:0005102//receptor binding	-
miR-281-x	XM_001121525.5	1717	1738	-14.15	aTCTCTCGCATAG-TACTTtact	x|||||||x||||x||x:|xxxx	aAGAGAGC-TATCCATCGAcagt	--	XP_001121525.2 uncharacterized protein LOC725708 [Apis mellifera]	-	-	-	-	-	GO:0003676//nucleic acid binding;GO:0043138//3'-5' DNA helicase activity	-
miR-281-x	XM_001121872.5	1185	1206	-17.94	tTCTCTCGAAAGcgctaaaata	x||||||||x||xxxxxxxxxx	aAGAGAGCTATCcatcgacagt	--	XP_001121872.3 zwei Ig domain protein zig-8 isoform X2 [Apis mellifera]	-	-	-	-	-	-	-
miR-281-x	XM_001122321.5	986	1007	-11.88	gTCTCTCGccttctaaggttta	x|||||||xxxxxxxxxxxxxx	aAGAGAGCtatccatcgacagt	bhlhe22	XP_001122321.2 class E basic helix-loop-helix protein 23 [Apis mellifera]	-	-	-	-	-	GO:0046983//protein dimerization activity	-
miR-281-x	XM_001122470.5	28	49	-10.15	cTCTCTCGTTttaattaattta	x|||||||x|xxxxxxxxxxxx	aAGAGAGCTAtccatcgacagt	--	XP_001122470.3 fibroin heavy chain isoform X5 [Apis mellifera]	-	-	-	-	-	-	-
miR-281-x	XM_001122993.5	1531	1552	-11.7	cTCTCTCGCTTGcacttacgct	x|||||||x|x|xxxxxxxxxx	aAGAGAGCTATCcatcgacagt	SOX8	XP_001122993.1 transcription factor Sox-10 isoform X2 [Apis mellifera]	Environmental Information Processing	Signal transduction	ko04024//cAMP signaling pathway	K18435	-	-	-
miR-281-x	XM_003249411.3	98	120	-21.88	tTCTCTCGCATCGGTGGTctact	x|||||||x||x|||:|:xxxxx	aAGAGAGC-TATCCATCGacagt	RAP2A	XP_003249459.1 ras-related protein Rap-2a [Apis mellifera]	Cellular Processes	Cellular community - eukaryotes	ko04530//Tight junction	K07839	GO:0005737//cytoplasm	GO:0003743//translation initiation factor activity;GO:0003924//GTPase activity;GO:0005525//GTP binding;GO:0015639//ferrous iron uptake transmembrane transporter activity;GO:0016767//geranylgeranyl-diphosphate geranylgeranyltransferase activity;GO:0019001//guanyl nucleotide binding;GO:0031683//G-protein beta/gamma-subunit complex binding;GO:0043022//ribosome binding;GO:0046408//chlorophyll synthet…	GO:0006400//tRNA modification;GO:0006413//translational initiation;GO:0007186//G-protein coupled receptor signaling pathway;GO:0008150//biological_process;GO:0015684//ferrous iron transport;GO:0042254//ribosome biogenesis;GO:0051186//cofactor metabolic process
miR-281-x	XM_003249471.4	574	595	-18.59	tTCTCTCGAgcttattgcttct	x||||||||xxxxxxxxxxxxx	aAGAGAGCTatccatcgacagt	NOL4	XP_003249519.2 uncharacterized protein LOC100578337 [Apis mellifera]	-	-	-	-	-	-	-
miR-281-x	XM_003249483.4	538	561	-11.99	aTCTCTCGTTTTCAGTATTTATaa	x|||||||x|xxxx|||x:|x|xx	aAGAGAGCTATC--CATCGACAgt	bmb	XP_003249531.1 protein brambleberry [Apis mellifera]	-	-	-	-	-	-	-
miR-281-x	XM_003249623.4	3030	3053	-14.38	tTCTCTCGCTTTGATACCTAGTtc	x|||||||x|xx|x||x||x||xx	aAGAGAGCTATCC-ATCGA-CAgt	--	XP_003249671.1 cytochrome b561 domain-containing protein 2 [Apis mellifera]	-	-	-	-	-	-	-
miR-281-x	XM_003249633.4	303	323	-17.42	tTCTCTCG-TAGAAGCCTATtt	x|||||||x|||xx:x||x|xx	aAGAGAGCTATCCATCGACAgt	--	XP_003249681.1 uncharacterized protein LOC100578090 [Apis mellifera]	-	-	-	-	-	-	-
miR-281-x	XM_003249876.4	130	150	-18.65	tTCTCTCGCTAGA-AGCaaaat	x|||||||x|||xx|||xxxxx	aAGAGAGCTATCCATCGacagt	--	XP_003249924.2 uncharacterized protein LOC100576702 [Apis mellifera]	-	-	-	-	-	-	-
miR-281-x	XM_003250483.4	70	90	-19.53	cTCTCTCGAT-GGCATTTGTag	x|||||||||x||x|x:|||xx	aAGAGAGCTATCCATCGACAgt	NOVA1	XP_003250531.1 RNA-binding protein Nova-1 isoform X1 [Apis mellifera]	-	-	-	-	-	GO:0003723//RNA binding;GO:0004654//polyribonucleotide nucleotidyltransferase activity	GO:0006402//mRNA catabolic process
miR-281-x	XM_003250944.4	276	299	-14.41	gTCTCTCGCGATAGTAAGaaaaga	x|||||||xx||||xx||xxxxxx	aAGAGAGC--TATCCATCgacagt	rnf8-B	XP_003250992.1 E3 ubiquitin-protein ligase RNF8 isoform X1 [Apis mellifera]	-	-	-	-	GO:0000109//nucleotide-excision repair complex	GO:0003723//RNA binding;GO:0005515//protein binding;GO:0008270//zinc ion binding;GO:0046872//metal ion binding;GO:0061630//ubiquitin protein ligase activity	GO:0006289//nucleotide-excision repair
miR-281-x	XM_003251081.4	34	55	-13.86	gTCTCTCGAAAGATAACataaa	x||||||||x||x||x|xxxxx	aAGAGAGCTATCCATCGacagt	--	XP_003251129.1 uncharacterized protein LOC100577237 isoform X1 [Apis mellifera]	-	-	-	-	GO:0005887//integral component of plasma membrane	GO:0042954//lipoprotein transporter activity	GO:0042953//lipoprotein transport
miR-281-x	XM_003251269.4	5499	5522	-15.96	tTCTCTCGCTTGAGGAAtaacctg	x|||||||x|xx|||x|xxxxxxx	aAGAGAGCTA--TCCATcgacagt	TMEM272	XP_003251317.2 uncharacterized protein LOC100577635 isoform X1 [Apis mellifera]	-	-	-	-	-	-	-
miR-281-x	XM_003251788.4	1271	1292	-12.73	cTCTCTCGTTGCTTTGTTcgag	x|||||||x|:xx|x|:|xxxx	aAGAGAGCTATCCATCGAcagt	brat	XP_003251836.1 brain tumor protein [Apis mellifera]	-	-	-	-	-	GO:0005515//protein binding;GO:0008270//zinc ion binding;GO:0016755//transferase activity, transferring amino-acyl groups	GO:0019184//nonribosomal peptide biosynthetic process
miR-281-x	XM_003251812.4	206	228	-13.85	tTCTCTCGTATAtcacgttcaaa	x|||||||x|||xxxxxxxxxxx	aAGAGAGC-TATccatcgacagt	YMR099C	XP_003251860.1 glucose-6-phosphate 1-epimerase [Apis mellifera]	Metabolism;Metabolism	Global and overview maps;Carbohydrate metabolism	ko01100//Metabolic pathways;ko00010//Glycolysis / Gluconeogenesis	K01792;K01792	-	GO:0016853//isomerase activity	GO:0005975//carbohydrate metabolic process
miR-281-x	XM_006557369.3	1369	1389	-13.06	tTCTCTCG-TAAGTcttagatt	x|||||||x||x||xxxxxxxx	aAGAGAGCTATCCAtcgacagt	Wdr47	XP_006557432.1 WD repeat-containing protein 47 isoform X2 [Apis mellifera]	-	-	-	-	-	GO:0005515//protein binding	-
miR-281-x	XM_006557372.3	1369	1389	-13.06	tTCTCTCG-TAAGTcttagatt	x|||||||x||x||xxxxxxxx	aAGAGAGCTATCCAtcgacagt	Wdr47	XP_006557435.1 WD repeat-containing protein 47 isoform X5 [Apis mellifera]	-	-	-	-	-	GO:0005515//protein binding	-
miR-281-x	XM_006557572.3	9	30	-15.92	gTCTCTCGATAccatgtattac	x||||||||||xxxxxxxxxxx	aAGAGAGCTATccatcgacagt	--	XP_006557635.1 zinc finger protein 578 [Apis mellifera]	Human Diseases	Infectious diseases	ko05168//Herpes simplex infection	K09228	-	GO:0005515//protein binding	GO:0006457//protein folding
miR-281-x	XM_006557574.3	9	30	-15.92	gTCTCTCGATAccatgtattac	x||||||||||xxxxxxxxxxx	aAGAGAGCTATccatcgacagt	--	XP_006557635.1 zinc finger protein 578 [Apis mellifera]	Human Diseases	Infectious diseases	ko05168//Herpes simplex infection	K09228	-	GO:0005515//protein binding	GO:0006457//protein folding
miR-281-x	XM_006557870.3	459	480	-12.47	cTCTCTCGtgcacagaccgcag	x|||||||xxxxxxxxxxxxxx	aAGAGAGCtatccatcgacagt	--	XP_006557933.2 uncharacterized protein LOC102654001 [Apis mellifera]	-	-	-	-	-	-	-
miR-281-x	XM_006557941.3	806	827	-16.6	gTCTCTCGCAAGGGGGggaagg	x|||||||xx|||x:|xxxxxx	aAGAGAGCTATCCATCgacagt	CAC	XP_006558004.1 voltage-dependent calcium channel type A subunit alpha-1 isoform X1 [Apis mellifera]	Human Diseases;Environmental Information Processing;Environmental Information Processing;Organismal Systems;Organismal Systems;Organismal Systems;Organismal Systems;Human Diseases;Organismal Systems;Organismal Systems;Human Diseases;Human Diseases	Neurodegenerative diseases;Signal transduction;Signal transduction;Nervous system;Nervous system;Nervous system;Nervous system;Substance dependence;Nervous system;Nervous system;Endocrine and metabolic diseases;Substance dependence	ko05016//Huntington disease;ko04010//MAPK signaling pathway;ko04020//Calcium signaling pathway;ko04728//Dopaminergic synapse;ko04721//Synaptic vesicle cycle;ko04725//Cholinergic synapse;ko04723//Retrograde endocannabinoid signaling;ko05032//Morphine addiction;ko04726//Serotonergic synapse;ko04727//GABAergic synapse;ko04930//Type II diabetes mellitus;ko05033//Nicotine addiction	K04849;K04849;K04849;K04849;K04849;K04849;K04849;K04849;K04849;K04849;K04849;K04849	GO:0016020//membrane	GO:0005216//ion channel activity;GO:0005509//calcium ion binding	GO:0006811//ion transport;GO:0055085//transmembrane transport
miR-281-x	XM_006558577.3	1595	1613	-13.47	cTCTCTCGC---GTTGCTCTtt	x|||||||xxxx||x|||x|xx	aAGAGAGCTATCCATCGACAgt	--	XP_026302023.1 uncharacterized protein LOC409327 isoform X1 [Apis mellifera]	-	-	-	-	-	-	-
miR-281-x	XM_006558937.3	167	188	-10.38	cTCTCTCGcctcgccacccttc	x|||||||xxxxxxxxxxxxxx	aAGAGAGCtatccatcgacagt	--	XP_006559000.1 uncharacterized protein LOC102656461 [Apis mellifera]	-	-	-	-	-	-	-
miR-281-x	XM_006558939.3	352	373	-14.42	cTCTCTCGtccttaaagcagaa	x|||||||xxxxxxxxxxxxxx	aAGAGAGCtatccatcgacagt	caup	XP_006559002.1 iroquois-class homeodomain protein IRX-6 isoform X1 [Apis mellifera]	-	-	-	-	-	GO:0003677//DNA binding	GO:0006355//regulation of transcription, DNA-templated
miR-281-x	XM_006558940.3	461	482	-14.42	cTCTCTCGtccttaaagcagaa	x|||||||xxxxxxxxxxxxxx	aAGAGAGCtatccatcgacagt	caup	XP_006559003.1 iroquois-class homeodomain protein IRX-6 isoform X2 [Apis mellifera]	-	-	-	-	-	GO:0003677//DNA binding	GO:0006355//regulation of transcription, DNA-templated
miR-281-x	XM_006559127.3	57	78	-15.31	aTCTCTCGActttaaagggtat	x||||||||xxxxxxxxxxxxx	aAGAGAGCTatccatcgacagt	SNX24	XP_006559190.1 sorting nexin-24 [Apis mellifera]	-	-	-	-	-	GO:0035091//phosphatidylinositol binding	-
miR-281-x	XM_006559279.3	316	337	-14.78	tTCTCTCGcgttaaaagagtcg	x|||||||xxxxxxxxxxxxxx	aAGAGAGCtatccatcgacagt	--	XP_006559342.1 uncharacterized protein LOC102656505 [Apis mellifera]	-	-	-	-	-	-	GO:0007219//Notch signaling pathway;GO:0007423//sensory organ development
miR-281-x	XM_006559593.3	574	595	-18.59	tTCTCTCGAgcttattgcttct	x||||||||xxxxxxxxxxxxx	aAGAGAGCTatccatcgacagt	NOL4	XP_003249519.2 uncharacterized protein LOC100578337 [Apis mellifera]	-	-	-	-	-	-	-
miR-281-x	XM_006559594.3	574	595	-18.59	tTCTCTCGAgcttattgcttct	x||||||||xxxxxxxxxxxxx	aAGAGAGCTatccatcgacagt	NOL4	XP_003249519.2 uncharacterized protein LOC100578337 [Apis mellifera]	-	-	-	-	-	-	-
miR-281-x	XM_006559596.3	574	595	-18.59	tTCTCTCGAgcttattgcttct	x||||||||xxxxxxxxxxxxx	aAGAGAGCTatccatcgacagt	NOL4	XP_003249519.2 uncharacterized protein LOC100578337 [Apis mellifera]	-	-	-	-	-	-	-
miR-281-x	XM_006559974.3	460	482	-13.09	cTCTCTCGCAAAGCGACCacttg	x|||||||x|x||xx|x|xxxxx	aAGAGAGC-TATCCATCGacagt	--	XP_006560037.1 toxin 3FTx-Lei1 [Apis mellifera]	Organismal Systems;Organismal Systems	Immune system;Immune system	ko04640//Hematopoietic cell lineage;ko04610//Complement and coagulation cascades	K04008;K04008	-	-	-
miR-281-x	XM_006560040.3	563	584	-14.26	tTCTCTCGTTActccgtgcagt	x|||||||x||xxxxxxxxxxx	aAGAGAGCTATccatcgacagt	--	-	-	-	-	-	-	-	-
miR-281-x	XM_006560081.3	962	984	-12.75	cTCTCTCGCCATCCTTGCTcagc	x|||||||xx|xxx|x|||xxxx	aAGAGAGCTATCC-ATCGAcagt	--	XP_006560144.1 uncharacterized protein LOC102656244 [Apis mellifera]	-	-	-	-	GO:0005886//plasma membrane	GO:0005515//protein binding	GO:0043065//positive regulation of apoptotic process
miR-281-x	XM_006560114.3	97	120	-14.9	cTCTCTCGCACTAGAAAGTctaaa	x|||||||x|x|||xx||:xxxxx	aAGAGAGC-T-ATCCATCGacagt	Hpgd	XP_006560177.1 15-hydroxyprostaglandin dehydrogenase [NAD(+)] isoform X1 [Apis mellifera]	Human Diseases	Cancers	ko05202//Transcriptional misregulation in cancers	K00069	GO:0005737//cytoplasm	GO:0003824//catalytic activity;GO:0003854//3-beta-hydroxy-delta5-steroid dehydrogenase activity;GO:0003978//UDP-glucose 4-epimerase activity;GO:0004316//3-oxoacyl-[acyl-carrier-protein] reductase (NADPH) activity;GO:0004488//methylenetetrahydrofolate dehydrogenase (NADP+) activity;GO:0004757//sepiapterin reductase activity;GO:0004764//shikimate 3-dehydrogenase (NADP+) activity;GO:0008460//dTDP-gl…	GO:0000272//polysaccharide catabolic process;GO:0006012//galactose metabolic process;GO:0006633//fatty acid biosynthetic process;GO:0006694//steroid biosynthetic process;GO:0006729//tetrahydrobiopterin biosynthetic process;GO:0008652//cellular amino acid biosynthetic process;GO:0009243//O antigen biosynthetic process;GO:0009423//chorismate biosynthetic process;GO:0015995//chlorophyll biosynthetic…
miR-281-x	XM_006560115.3	97	120	-14.9	cTCTCTCGCACTAGAAAGTctaaa	x|||||||x|x|||xx||:xxxxx	aAGAGAGC-T-ATCCATCGacagt	Hpgd	XP_006560178.1 15-hydroxyprostaglandin dehydrogenase [NAD(+)] isoform X2 [Apis mellifera]	Human Diseases	Cancers	ko05202//Transcriptional misregulation in cancers	K00069	-	GO:0003824//catalytic activity;GO:0004316//3-oxoacyl-[acyl-carrier-protein] reductase (NADPH) activity;GO:0004757//sepiapterin reductase activity;GO:0008460//dTDP-glucose 4,6-dehydratase activity;GO:0008667//2,3-dihydro-2,3-dihydroxybenzoate dehydrogenase activity;GO:0008678//2-deoxy-D-gluconate 3-dehydrogenase activity;GO:0016491//oxidoreductase activity;GO:0050662//coenzyme binding;GO:0051287//…	GO:0000272//polysaccharide catabolic process;GO:0006633//fatty acid biosynthetic process;GO:0006729//tetrahydrobiopterin biosynthetic process;GO:0009243//O antigen biosynthetic process;GO:0019305//dTDP-rhamnose biosynthetic process;GO:0055114//oxidation-reduction process
miR-281-x	XM_006560168.3	1428	1448	-14.53	tTCTCTCGA-ATTTAGaaataa	x||||||||x|xx|||xxxxxx	aAGAGAGCTATCCATCgacagt	GluClalpha	XP_006560231.1 glutamate-gated chloride channel isoform X1 [Apis mellifera]	-	-	-	-	GO:0016021//integral component of membrane	GO:0005230//extracellular ligand-gated ion channel activity	GO:0006811//ion transport
miR-281-x	XM_006560169.3	1428	1448	-14.53	tTCTCTCGA-ATTTAGaaataa	x||||||||x|xx|||xxxxxx	aAGAGAGCTATCCATCgacagt	GluClalpha	XP_006560232.1 glutamate-gated chloride channel isoform X2 [Apis mellifera]	-	-	-	-	GO:0016021//integral component of membrane	GO:0005230//extracellular ligand-gated ion channel activity	GO:0006811//ion transport
miR-281-x	XM_006560170.3	1428	1448	-14.53	tTCTCTCGA-ATTTAGaaataa	x||||||||x|xx|||xxxxxx	aAGAGAGCTATCCATCgacagt	GluClalpha	XP_006560233.1 glutamate-gated chloride channel isoform X3 [Apis mellifera]	-	-	-	-	GO:0016021//integral component of membrane	GO:0005230//extracellular ligand-gated ion channel activity	GO:0006811//ion transport
miR-281-x	XM_006560173.3	1428	1448	-14.53	tTCTCTCGA-ATTTAGaaataa	x||||||||x|xx|||xxxxxx	aAGAGAGCTATCCATCgacagt	GluClalpha	XP_006560233.1 glutamate-gated chloride channel isoform X3 [Apis mellifera]	-	-	-	-	GO:0016021//integral component of membrane	GO:0005230//extracellular ligand-gated ion channel activity	GO:0006811//ion transport
miR-281-x	XM_006560289.3	1475	1495	-14.05	tTCTCTCG-TCGTTTGCccatg	x|||||||x|x|x|x||xxxxx	aAGAGAGCTATCCATCGacagt	FOXP1	XP_006560352.1 foxP protein isoform X16 [Apis mellifera]	-	-	-	-	-	GO:0003700//transcription factor activity, sequence-specific DNA binding;GO:0043565//sequence-specific DNA binding	GO:0006355//regulation of transcription, DNA-templated
miR-281-x	XM_006560347.3	4225	4245	-15.24	aTCTCTCGAAAGA-AGTTccgt	x||||||||x||xx||:|xxxx	aAGAGAGCTATCCATCGAcagt	ab	XP_006560410.1 protein abrupt isoform X1 [Apis mellifera]	-	-	-	-	-	GO:0005515//protein binding	-
miR-281-x	XM_006560348.3	4225	4245	-15.24	aTCTCTCGAAAGA-AGTTccgt	x||||||||x||xx||:|xxxx	aAGAGAGCTATCCATCGAcagt	ab	XP_006560410.1 protein abrupt isoform X1 [Apis mellifera]	-	-	-	-	-	GO:0005515//protein binding	-
miR-281-x	XM_006560349.3	4225	4245	-15.24	aTCTCTCGAAAGA-AGTTccgt	x||||||||x||xx||:|xxxx	aAGAGAGCTATCCATCGAcagt	ab	XP_006560410.1 protein abrupt isoform X1 [Apis mellifera]	-	-	-	-	-	GO:0005515//protein binding	-
miR-281-x	XM_006560350.3	4225	4245	-15.24	aTCTCTCGAAAGA-AGTTccgt	x||||||||x||xx||:|xxxx	aAGAGAGCTATCCATCGAcagt	ab	XP_006560410.1 protein abrupt isoform X1 [Apis mellifera]	-	-	-	-	-	GO:0005515//protein binding	-
miR-281-x	XM_006560352.3	4225	4245	-15.24	aTCTCTCGAAAGA-AGTTccgt	x||||||||x||xx||:|xxxx	aAGAGAGCTATCCATCGAcagt	ab	XP_006560410.1 protein abrupt isoform X1 [Apis mellifera]	-	-	-	-	-	GO:0005515//protein binding	-
miR-281-x	XM_006560353.3	4225	4245	-15.24	aTCTCTCGAAAGA-AGTTccgt	x||||||||x||xx||:|xxxx	aAGAGAGCTATCCATCGAcagt	ab	XP_006560410.1 protein abrupt isoform X1 [Apis mellifera]	-	-	-	-	-	GO:0005515//protein binding	-
miR-281-x	XM_006560354.3	4225	4245	-15.24	aTCTCTCGAAAGA-AGTTccgt	x||||||||x||xx||:|xxxx	aAGAGAGCTATCCATCGAcagt	ab	XP_006560410.1 protein abrupt isoform X1 [Apis mellifera]	-	-	-	-	-	GO:0005515//protein binding	-
miR-281-x	XM_006560355.3	4225	4245	-15.24	aTCTCTCGAAAGA-AGTTccgt	x||||||||x||xx||:|xxxx	aAGAGAGCTATCCATCGAcagt	ab	XP_006560410.1 protein abrupt isoform X1 [Apis mellifera]	-	-	-	-	-	GO:0005515//protein binding	-
miR-281-x	XM_006560356.3	4225	4245	-15.24	aTCTCTCGAAAGA-AGTTccgt	x||||||||x||xx||:|xxxx	aAGAGAGCTATCCATCGAcagt	ab	XP_006560410.1 protein abrupt isoform X1 [Apis mellifera]	-	-	-	-	-	GO:0005515//protein binding	-
miR-281-x	XM_006560357.3	4225	4245	-15.24	aTCTCTCGAAAGA-AGTTccgt	x||||||||x||xx||:|xxxx	aAGAGAGCTATCCATCGAcagt	ab	XP_006560410.1 protein abrupt isoform X1 [Apis mellifera]	-	-	-	-	-	GO:0005515//protein binding	-
miR-281-x	XM_006560840.3	1155	1176	-17.72	cTCTCTCGGCGCTTAGCaccgg	x|||||||:x:xx||||xxxxx	aAGAGAGCTATCCATCGacagt	orb2	XP_006560903.1 cytoplasmic polyadenylation element-binding protein 2 [Apis mellifera]	Cellular Processes;Organismal Systems;Organismal Systems	Cell growth and death;Development;Endocrine system	ko04114//Oocyte meiosis;ko04320//Dorso-ventral axis formation;ko04914//Progesterone-mediated oocyte maturation	K02602;K02602;K02602	GO:0005634//nucleus;GO:0071203//WASH complex	GO:0003676//nucleic acid binding	GO:0006397//mRNA processing;GO:0008380//RNA splicing
miR-281-x	XM_006560903.2	378	402	-15.8	tTCTCTCGTCTGAATATATTTGTct	x|||||||xxx:x|xx||x:|||xx	aAGAGAGC---TATCCATCGACAgt	tdc-1	XP_006560966.1 aromatic-L-amino-acid decarboxylase isoform X1 [Apis mellifera]	Metabolism;Metabolism	Global and overview maps;Amino acid metabolism	ko01100//Metabolic pathways;ko00350//Tyrosine metabolism	K22329;K22329	-	GO:0004351//glutamate decarboxylase activity;GO:0004837//tyrosine decarboxylase activity;GO:0016740//transferase activity;GO:0016829//lyase activity;GO:0016831//carboxy-lyase activity;GO:0030170//pyridoxal phosphate binding	GO:0006520//cellular amino acid metabolic process;GO:0006540//glutamate decarboxylation to succinate;GO:0015940//pantothenate biosynthetic process;GO:0019752//carboxylic acid metabolic process;GO:0051188//cofactor biosynthetic process
miR-281-x	XM_006560904.3	378	402	-15.8	tTCTCTCGTCTGAATATATTTGTct	x|||||||xxx:x|xx||x:|||xx	aAGAGAGC---TATCCATCGACAgt	tdc-1	XP_006560967.1 aromatic-L-amino-acid decarboxylase isoform X2 [Apis mellifera]	Metabolism;Metabolism	Global and overview maps;Amino acid metabolism	ko01100//Metabolic pathways;ko00350//Tyrosine metabolism	K22329;K22329	-	GO:0004351//glutamate decarboxylase activity;GO:0004837//tyrosine decarboxylase activity;GO:0016740//transferase activity;GO:0016829//lyase activity;GO:0016831//carboxy-lyase activity;GO:0030170//pyridoxal phosphate binding	GO:0006520//cellular amino acid metabolic process;GO:0006540//glutamate decarboxylation to succinate;GO:0015940//pantothenate biosynthetic process;GO:0019752//carboxylic acid metabolic process;GO:0051188//cofactor biosynthetic process
miR-281-x	XM_006561046.3	525	547	-25.92	cTCTCTCGCTGGGAAAGCTGTgc	x|||||||x|:||x|x|||||xx	aAGAGAGCTATCCAT-CGACAgt	ACE	XP_006561109.1 angiotensin-converting enzyme isoform X3 [Apis mellifera]	Human Diseases;Organismal Systems;Human Diseases;Organismal Systems	Cardiovascular diseases;Endocrine system;Infectious diseases;Endocrine system	ko05410//Hypertrophic cardiomyopathy (HCM);ko04924//Renin secretion;ko05142//Chagas disease (American trypanosomiasis);ko04614//Renin-angiotensin system	K01283;K01283;K01283;K01283	GO:0016020//membrane	GO:0008237//metallopeptidase activity;GO:0008241//peptidyl-dipeptidase activity	GO:0006508//proteolysis
miR-281-x	XM_006561047.2	525	547	-25.92	cTCTCTCGCTGGGAAAGCTGTgc	x|||||||x|:||x|x|||||xx	aAGAGAGCTATCCAT-CGACAgt	ACE	XP_392082.3 angiotensin-converting enzyme isoform X2 [Apis mellifera]	Human Diseases;Organismal Systems;Human Diseases;Organismal Systems	Cardiovascular diseases;Endocrine system;Infectious diseases;Endocrine system	ko05410//Hypertrophic cardiomyopathy (HCM);ko04924//Renin secretion;ko05142//Chagas disease (American trypanosomiasis);ko04614//Renin-angiotensin system	K01283;K01283;K01283;K01283	GO:0016020//membrane	GO:0008237//metallopeptidase activity;GO:0008241//peptidyl-dipeptidase activity	GO:0006508//proteolysis
miR-281-x	XM_006561599.3	1218	1237	-22.1	cTCTCTCG-T-GTTGGCTGTgt	x|||||||x|x|x|:|||||xx	aAGAGAGCTATCCATCGACAgt	--	XP_006561662.2 uncharacterized protein LOC100576640 isoform X2 [Apis mellifera]	Environmental Information Processing;Human Diseases;Genetic Information Processing;Human Diseases;Human Diseases;Genetic Information Processing;Genetic Information Processing	Signal transduction;Cancers;Folding, sorting and degradation;Cancers;Drug resistance;Replication and repair;Replication and repair	ko04151//PI3K-Akt signaling pathway;ko05206//MicroRNAs in cancer;ko04120//Ubiquitin mediated proteolysis;ko05224//Breast cancer;ko01524//Platinum drug resistance;ko03440//Homologous recombination;ko03460//Fanconi anemia pathway	K10605;K10605;K10605;K10605;K10605;K10605;K10605	-	GO:0008270//zinc ion binding;GO:0046872//metal ion binding	-
miR-281-x	XM_006561684.3	1296	1317	-13.56	cTCTCTCGTTATTTAGacgaga	x|||||||x||xx|||xxxxxx	aAGAGAGCTATCCATCgacagt	NAA30	XP_006561747.1 N-alpha-acetyltransferase 30 [Apis mellifera]	-	-	-	-	-	GO:0008080//N-acetyltransferase activity;GO:0008999//ribosomal-protein-alanine N-acetyltransferase activity;GO:0016747//transferase activity, transferring acyl groups other than amino-acyl groups;GO:0035447//mycothiol synthase activity;GO:0047663//aminoglycoside 6'-N-acetyltransferase activity	GO:0006464//cellular protein modification process;GO:0010125//mycothiol biosynthetic process;GO:0030647//aminoglycoside antibiotic metabolic process;GO:0042254//ribosome biogenesis
miR-281-x	XM_006561783.3	28	49	-10.15	cTCTCTCGTTttaattaattta	x|||||||x|xxxxxxxxxxxx	aAGAGAGCTAtccatcgacagt	--	XP_006561848.2 fibroin heavy chain isoform X4 [Apis mellifera]	-	-	-	-	-	-	-
miR-281-x	XM_006561785.3	28	49	-10.15	cTCTCTCGTTttaattaattta	x|||||||x|xxxxxxxxxxxx	aAGAGAGCTAtccatcgacagt	--	XP_006561848.2 fibroin heavy chain isoform X4 [Apis mellifera]	-	-	-	-	-	-	-
miR-281-x	XM_006561835.3	639	659	-13.9	tTCTCTCGTTAAATAA-TGTgc	x|||||||x||xx||xx|||xx	aAGAGAGCTATCCATCGACAgt	NLGN4X	XP_006561898.2 uncharacterized protein LOC724358 isoform X1 [Apis mellifera]	Environmental Information Processing	Signaling molecules and interaction	ko04514//Cell adhesion molecules (CAMs)	K07378	-	GO:0016787//hydrolase activity	-
miR-281-x	XM_006561837.3	639	659	-13.9	tTCTCTCGTTAAATAA-TGTgc	x|||||||x||xx||xx|||xx	aAGAGAGCTATCCATCGACAgt	NLGN4Y	XP_006561900.2 uncharacterized protein LOC724358 isoform X3 [Apis mellifera]	Environmental Information Processing	Signaling molecules and interaction	ko04514//Cell adhesion molecules (CAMs)	K07378	-	GO:0016787//hydrolase activity	-
miR-281-x	XM_006561865.3	4168	4189	-13.56	tTCTCTCGGTcctctttttact	x|||||||:|xxxxxxxxxxxx	aAGAGAGCTAtccatcgacagt	--	XP_006561928.1 cell adhesion molecule 2 isoform X2 [Apis mellifera]	-	-	-	-	-	-	-
miR-281-x	XM_006561950.3	419	441	-11.99	aTCTCTCGTTTAAGTAATTaaat	x|||||||x|x|x|||x:|xxxx	aAGAGAGCTA-TCCATCGAcagt	Kpna4	XP_006562013.1 importin subunit alpha-3 [Apis mellifera]	-	-	-	-	GO:0000221//vacuolar proton-transporting V-type ATPase, V1 domain	GO:0005515//protein binding;GO:0061608//nuclear import signal receptor activity	GO:0006606//protein import into nucleus;GO:1902600//hydrogen ion transmembrane transport
miR-281-x	XM_006562126.3	822	842	-15.82	aTCTCTCGACTAA--AGCTTTtt	x||||||||x||xxx||||x|xx	aAGAGAGCT-ATCCATCGACAgt	Cks30A	XP_003696283.1 cyclin-dependent kinases regulatory subunit-like [Apis florea]	-	-	-	-	-	GO:0016538//cyclin-dependent protein serine/threonine kinase regulator activity	-
miR-281-x	XM_006562148.3	532	554	-16.91	aTCTCTCGGGAACCGAGCTtaca	x|||||||:x|xxxx||||xxxx	aAGAGAGCTATCCA-TCGAcagt	gpp	XP_006562211.1 histone-lysine N-methyltransferase, H3 lysine-79 specific [Apis mellifera]	Metabolism;Human Diseases;Metabolism	Global and overview maps;Cancers;Amino acid metabolism	ko01100//Metabolic pathways;ko05202//Transcriptional misregulation in cancers;ko00310//Lysine degradation	K11427;K11427;K11427	-	GO:0008176//tRNA (guanine-N7-)-methyltransferase activity;GO:0018024//histone-lysine N-methyltransferase activity;GO:0046025//precorrin-6Y C5,15-methyltransferase (decarboxylating) activity	GO:0006400//tRNA modification;GO:0046140//corrin biosynthetic process
miR-281-x	XM_006562415.3	69	92	-16.74	gTCTCTCGCGCCGTGGACCTGgac	x|||||||xxxx||:|xx|||xxx	aAGAGAGCTATCCATC--GACagt	ZFHX4	XP_006562478.2 zinc finger homeobox protein 4 isoform X2 [Apis mellifera]	Cellular Processes	Cellular community - eukaryotes	ko04550//Signaling pathways regulating pluripotency of stem cells	K09378	-	GO:0003677//DNA binding;GO:0004017//adenylate kinase activity	GO:0006355//regulation of transcription, DNA-templated
miR-281-x	XM_006562523.3	2132	2152	-12.9	aTCTCTCGACAC-TACTTcaaa	x||||||||x|xx||x:|xxxx	aAGAGAGCTATCCATCGAcagt	TEAD1	XP_006562586.1 transcriptional enhancer factor TEF-1 isoform X2 [Apis mellifera]	Environmental Information Processing;Environmental Information Processing;Environmental Information Processing	Signal transduction;Signal transduction;Signal transduction	ko04390//Hippo signaling pathway;ko04391//Hippo signaling pathway -fly;ko04392//Hippo signaling pathway - multiple species	K09448;K09448;K09448	-	GO:0003700//transcription factor activity, sequence-specific DNA binding	GO:0006355//regulation of transcription, DNA-templated
miR-281-x	XM_006562524.3	2132	2152	-12.9	aTCTCTCGACAC-TACTTcaaa	x||||||||x|xx||x:|xxxx	aAGAGAGCTATCCATCGAcagt	TEAD1	XP_006562586.1 transcriptional enhancer factor TEF-1 isoform X2 [Apis mellifera]	Environmental Information Processing;Environmental Information Processing;Environmental Information Processing	Signal transduction;Signal transduction;Signal transduction	ko04390//Hippo signaling pathway;ko04391//Hippo signaling pathway -fly;ko04392//Hippo signaling pathway - multiple species	K09448;K09448;K09448	-	GO:0003700//transcription factor activity, sequence-specific DNA binding	GO:0006355//regulation of transcription, DNA-templated
miR-281-x	XM_006562525.3	2132	2152	-12.9	aTCTCTCGACAC-TACTTcaaa	x||||||||x|xx||x:|xxxx	aAGAGAGCTATCCATCGAcagt	TEAD1	XP_006562586.1 transcriptional enhancer factor TEF-1 isoform X2 [Apis mellifera]	Environmental Information Processing;Environmental Information Processing;Environmental Information Processing	Signal transduction;Signal transduction;Signal transduction	ko04390//Hippo signaling pathway;ko04391//Hippo signaling pathway -fly;ko04392//Hippo signaling pathway - multiple species	K09448;K09448;K09448	-	GO:0003700//transcription factor activity, sequence-specific DNA binding	GO:0006355//regulation of transcription, DNA-templated
miR-281-x	XM_006562526.3	2132	2152	-12.9	aTCTCTCGACAC-TACTTcaaa	x||||||||x|xx||x:|xxxx	aAGAGAGCTATCCATCGAcagt	TEAD1	XP_006562589.1 transcriptional enhancer factor TEF-1 isoform X4 [Apis mellifera]	Environmental Information Processing;Environmental Information Processing;Environmental Information Processing	Signal transduction;Signal transduction;Signal transduction	ko04390//Hippo signaling pathway;ko04391//Hippo signaling pathway -fly;ko04392//Hippo signaling pathway - multiple species	K09448;K09448;K09448	-	GO:0003700//transcription factor activity, sequence-specific DNA binding	GO:0006355//regulation of transcription, DNA-templated
miR-281-x	XM_006562527.3	2132	2152	-12.9	aTCTCTCGACAC-TACTTcaaa	x||||||||x|xx||x:|xxxx	aAGAGAGCTATCCATCGAcagt	TEAD1	XP_006562590.1 transcriptional enhancer factor TEF-1 isoform X6 [Apis mellifera]	Environmental Information Processing;Environmental Information Processing;Environmental Information Processing	Signal transduction;Signal transduction;Signal transduction	ko04390//Hippo signaling pathway;ko04391//Hippo signaling pathway -fly;ko04392//Hippo signaling pathway - multiple species	K09448;K09448;K09448	-	GO:0003700//transcription factor activity, sequence-specific DNA binding	GO:0006355//regulation of transcription, DNA-templated
miR-281-x	XM_006562529.3	2132	2152	-12.9	aTCTCTCGACAC-TACTTcaaa	x||||||||x|xx||x:|xxxx	aAGAGAGCTATCCATCGAcagt	TEAD1	XP_026301840.1 transcriptional enhancer factor TEF-1 isoform X7 [Apis mellifera]	Environmental Information Processing;Environmental Information Processing;Environmental Information Processing	Signal transduction;Signal transduction;Signal transduction	ko04390//Hippo signaling pathway;ko04391//Hippo signaling pathway -fly;ko04392//Hippo signaling pathway - multiple species	K09448;K09448;K09448	-	GO:0003700//transcription factor activity, sequence-specific DNA binding	GO:0006355//regulation of transcription, DNA-templated
miR-281-x	XM_006562568.3	228	251	-10.62	aTCTCTCGTGACAGATtttgacgc	x|||||||xx|x||x|xxxxxxxx	aAGAGAGC--TATCCAtcgacagt	ost-1	XP_006562631.2 SPARC [Apis mellifera]	-	-	-	-	-	GO:0005509//calcium ion binding;GO:0005515//protein binding	-
miR-281-x	XM_006562654.3	8087	8108	-10.15	gTCTCTCGTTAaaattaccggg	x|||||||x||xxxxxxxxxxx	aAGAGAGCTATccatcgacagt	bab2	XP_006562717.2 protein bric-a-brac 1-like isoform X1 [Apis mellifera]	-	-	-	-	GO:0005672//transcription factor TFIIA complex;GO:0030867//rough endoplasmic reticulum membrane	GO:0003729//mRNA binding;GO:0005515//protein binding	GO:0000398//mRNA splicing, via spliceosome;GO:0006367//transcription initiation from RNA polymerase II promoter;GO:0023041//neuronal signal transduction
miR-281-x	XM_006562746.3	868	889	-13.03	cTCTCTCGATtttgacactttg	x|||||||||xxxxxxxxxxxx	aAGAGAGCTAtccatcgacagt	Sin3a	XP_006562809.1 paired amphipathic helix protein Sin3a isoform X3 [Apis mellifera]	Human Diseases;Organismal Systems;Human Diseases;Human Diseases	Neurodegenerative diseases;Endocrine system;Cancers;Infectious diseases	ko05016//Huntington disease;ko04919//Thyroid hormone signaling pathway;ko05202//Transcriptional misregulation in cancers;ko05169//Epstein-Barr virus infection	K11644;K11644;K11644;K11644	-	-	GO:0006355//regulation of transcription, DNA-templated
miR-281-x	XM_006562864.3	15	36	-13.86	tTCTCTCGCTccacaccagcga	x|||||||x|xxxxxxxxxxxx	aAGAGAGCTAtccatcgacagt	moody	XP_006562927.1 G-protein coupled receptor moody isoform X2 [Apis mellifera]	Environmental Information Processing;Organismal Systems	Signaling molecules and interaction;Environmental adaptation	ko04080//Neuroactive ligand-receptor interaction;ko04713//Circadian entrainment	K04286;K04286	GO:0016021//integral component of membrane	GO:0004930//G-protein coupled receptor activity;GO:0008528//G-protein coupled peptide receptor activity	GO:0007186//G-protein coupled receptor signaling pathway
miR-281-x	XM_006563202.3	129	150	-12.18	tTCTCTCGTTTATTAACAGTaa	x|||||||x|xxx||x|x||xx	aAGAGAGCTATCCATCGACAgt	DAT	XP_006563265.1 dopamine transporter isoform X3 [Apis mellifera]	Organismal Systems;Organismal Systems;Human Diseases;Human Diseases;Human Diseases;Human Diseases	Nervous system;Nervous system;Substance dependence;Substance dependence;Neurodegenerative diseases;Substance dependence	ko04728//Dopaminergic synapse;ko04721//Synaptic vesicle cycle;ko05031//Amphetamine addiction;ko05034//Alcoholism;ko05012//Parkinson disease;ko05030//Cocaine addiction	K05036;K05036;K05036;K05036;K05036;K05036	GO:0016021//integral component of membrane	-	-
miR-281-x	XM_006563323.3	9446	9467	-14.73	cTCTCTCGAGACGTTTCTTTag	x||||||||x|x||xx||x|xx	aAGAGAGCTATCCATCGACAgt	Mblk-1	XP_006563386.2 mushroom body large-type Kenyon cell-specific protein 1 isoform X1 [Apis mellifera]	Cellular Processes	Cell growth and death	ko04214//Apoptosis - fly	K20015	-	GO:0003677//DNA binding	-
miR-281-x	XM_006563549.3	43	64	-12.09	gTCTCTCGActttgatcgactt	x||||||||xxxxxxxxxxxxx	aAGAGAGCTatccatcgacagt	shg	XP_006563612.1 DE-cadherin isoform X1 [Apis mellifera]	-	-	-	-	GO:0016020//membrane	GO:0005509//calcium ion binding	GO:0007156//homophilic cell adhesion via plasma membrane adhesion molecules
miR-281-x	XM_006563550.3	43	64	-12.09	gTCTCTCGActttgatcgactt	x||||||||xxxxxxxxxxxxx	aAGAGAGCTatccatcgacagt	shg	XP_006563613.1 DE-cadherin isoform X2 [Apis mellifera]	-	-	-	-	GO:0016020//membrane	GO:0005509//calcium ion binding	GO:0007156//homophilic cell adhesion via plasma membrane adhesion molecules
miR-281-x	XM_006563666.3	89	111	-16.12	tTCTCTCGCATAAGGAaaaaaga	x|||||||x|||x|x|xxxxxxx	aAGAGAGC-TATCCATcgacagt	Slc6a5	XP_006563729.1 sodium- and chloride-dependent betaine transporter isoform X1 [Apis mellifera]	Organismal Systems	Nervous system	ko04721//Synaptic vesicle cycle	K05038	GO:0016021//integral component of membrane	-	-
miR-281-x	XM_006563802.3	5	27	-13.14	aTCTCTCGCATttctgcgaaact	x|||||||x||xxxxxxxxxxxx	aAGAGAGC-TAtccatcgacagt	MIB2	XP_006563865.1 E3 ubiquitin-protein ligase MIB2 [Apis mellifera]	-	-	-	-	-	GO:0004842//ubiquitin-protein transferase activity;GO:0005515//protein binding;GO:0008270//zinc ion binding;GO:0046872//metal ion binding	GO:0016567//protein ubiquitination
miR-281-x	XM_006563924.2	363	385	-15.42	aTCTCTCGAGATTTGGACTTTag	x||||||||x|xx|:|x||x|xx	aAGAGAGCTATCCATC-GACAgt	fax	XP_016912717.1 failed axon connections [Apis cerana]	-	-	-	-	GO:0001401//mitochondrial sorting and assembly machinery complex;GO:0016021//integral component of membrane	GO:0005219//ryanodine-sensitive calcium-release channel activity;GO:0005515//protein binding	GO:0006749//glutathione metabolic process;GO:0006874//cellular calcium ion homeostasis
miR-281-x	XM_006563990.3	4888	4909	-17.26	tTCTCTCGAGAGAGAGagagaa	x||||||||x||xx||xxxxxx	aAGAGAGCTATCCATCgacagt	Tob1	XP_006564053.1 protein Tob1 [Apis mellifera]	Genetic Information Processing	Folding, sorting and degradation	ko03018//RNA degradation	K14443	GO:0005672//transcription factor TFIIA complex;GO:0016021//integral component of membrane	GO:0004190//aspartic-type endopeptidase activity	GO:0006367//transcription initiation from RNA polymerase II promoter;GO:0006811//ion transport;GO:0016485//protein processing
miR-281-x	XM_006563992.3	4888	4909	-17.26	tTCTCTCGAGAGAGAGagagaa	x||||||||x||xx||xxxxxx	aAGAGAGCTATCCATCgacagt	Tob1	XP_006564053.1 protein Tob1 [Apis mellifera]	Genetic Information Processing	Folding, sorting and degradation	ko03018//RNA degradation	K14443	GO:0005672//transcription factor TFIIA complex;GO:0016021//integral component of membrane	GO:0004190//aspartic-type endopeptidase activity	GO:0006367//transcription initiation from RNA polymerase II promoter;GO:0006811//ion transport;GO:0016485//protein processing
miR-281-x	XM_006564180.3	106	128	-16.6	cTCTCTCGAACAATTAGTAGTac	x||||||||xx|xx|||:x||xx	aAGAGAGCTA-TCCATCGACAgt	Psn	XP_006564243.2 presenilin-1 [Apis mellifera]	Human Diseases;Human Diseases;Environmental Information Processing;Organismal Systems;Organismal Systems;Environmental Information Processing	Neurodegenerative diseases;Infectious diseases;Signal transduction;Development and regeneration;Nervous system;Signal transduction	ko05010//Alzheimer disease;ko05165//Human papillomavirus infection;ko04310//Wnt signaling pathway;ko04361//Axon regeneration;ko04722//Neurotrophin signaling pathway;ko04330//Notch signaling pathway	K04505;K04505;K04505;K04505;K04505;K04505	GO:0016021//integral component of membrane	GO:0004190//aspartic-type endopeptidase activity	GO:0016485//protein processing
miR-281-x	XM_006564487.3	2292	2311	-23.99	cTCTCTCGA-AGG-ATCTGTct	x||||||||x|||x|x||||xx	aAGAGAGCTATCCATCGACAgt	PNP	XP_006564550.1 purine nucleoside phosphorylase isoform X2 [Apis mellifera]	Metabolism;Metabolism;Metabolism;Metabolism	Global and overview maps;Nucleotide metabolism;Nucleotide metabolism;Metabolism of cofactors and vitamins	ko01100//Metabolic pathways;ko00230//Purine metabolism;ko00240//Pyrimidine metabolism;ko00760//Nicotinate and nicotinamide metabolism	K03783;K03783;K03783;K03783	GO:0005576//extracellular region	GO:0000772//mating pheromone activity;GO:0003824//catalytic activity;GO:0004731//purine-nucleoside phosphorylase activity;GO:0008782//adenosylhomocysteine nucleosidase activity;GO:0008930//methylthioadenosine nucleosidase activity;GO:0017061//S-methyl-5-thioadenosine phosphorylase activity	GO:0006139//nucleobase-containing compound metabolic process;GO:0006168//adenine salvage;GO:0009116//nucleoside metabolic process;GO:0019509//L-methionine biosynthetic process from methylthioadenosine;GO:0019953//sexual reproduction
miR-281-x	XM_006564622.3	609	628	-20.42	tTCTCTCG-TAGCTA-CTGTtt	x|||||||x|||x||x||||xx	aAGAGAGCTATCCATCGACAgt	AGAP005037	XP_006564685.2 uncharacterized protein LOC411277 isoform X1 [Apis mellifera]	-	-	-	-	-	-	-
miR-281-x	XM_006564623.3	609	628	-20.42	tTCTCTCG-TAGCTA-CTGTtt	x|||||||x|||x||x||||xx	aAGAGAGCTATCCATCGACAgt	AGAP005037	XP_006564685.2 uncharacterized protein LOC411277 isoform X1 [Apis mellifera]	-	-	-	-	-	-	-
miR-281-x	XM_006564624.3	609	628	-20.42	tTCTCTCG-TAGCTA-CTGTtt	x|||||||x|||x||x||||xx	aAGAGAGCTATCCATCGACAgt	AGAP005037	XP_006564685.2 uncharacterized protein LOC411277 isoform X1 [Apis mellifera]	-	-	-	-	-	-	-
miR-281-x	XM_006564625.3	609	628	-20.42	tTCTCTCG-TAGCTA-CTGTtt	x|||||||x|||x||x||||xx	aAGAGAGCTATCCATCGACAgt	AGAP005037	XP_006564688.2 uncharacterized protein LOC411277 isoform X2 [Apis mellifera]	-	-	-	-	-	-	-
miR-281-x	XM_006564626.3	609	628	-20.42	tTCTCTCG-TAGCTA-CTGTtt	x|||||||x|||x||x||||xx	aAGAGAGCTATCCATCGACAgt	AGAP005037	XP_006564689.2 uncharacterized protein LOC411277 isoform X3 [Apis mellifera]	-	-	-	-	-	-	-
miR-281-x	XM_006564627.3	609	628	-20.42	tTCTCTCG-TAGCTA-CTGTtt	x|||||||x|||x||x||||xx	aAGAGAGCTATCCATCGACAgt	AGAP005037	XP_006564690.2 uncharacterized protein LOC411277 isoform X4 [Apis mellifera]	-	-	-	-	-	-	-
miR-281-x	XM_006564628.3	609	628	-20.42	tTCTCTCG-TAGCTA-CTGTtt	x|||||||x|||x||x||||xx	aAGAGAGCTATCCATCGACAgt	AGAP005037	XP_006564691.2 uncharacterized protein LOC411277 isoform X5 [Apis mellifera]	-	-	-	-	-	-	-
miR-281-x	XM_006564629.3	609	628	-20.42	tTCTCTCG-TAGCTA-CTGTtt	x|||||||x|||x||x||||xx	aAGAGAGCTATCCATCGACAgt	AGAP005037	XP_006564692.2 uncharacterized protein LOC411277 isoform X7 [Apis mellifera]	-	-	-	-	-	-	-
miR-281-x	XM_006564630.3	609	628	-20.42	tTCTCTCG-TAGCTA-CTGTtt	x|||||||x|||x||x||||xx	aAGAGAGCTATCCATCGACAgt	AGAP005037	XP_006564693.2 uncharacterized protein LOC411277 isoform X8 [Apis mellifera]	-	-	-	-	-	-	-
miR-281-x	XM_006564631.3	609	628	-20.42	tTCTCTCG-TAGCTA-CTGTtt	x|||||||x|||x||x||||xx	aAGAGAGCTATCCATCGACAgt	AGAP005037	XP_006564694.2 uncharacterized protein LOC411277 isoform X9 [Apis mellifera]	-	-	-	-	-	-	-
miR-281-x	XM_006564632.3	609	628	-20.42	tTCTCTCG-TAGCTA-CTGTtt	x|||||||x|||x||x||||xx	aAGAGAGCTATCCATCGACAgt	AGAP005037	XP_006564695.2 uncharacterized protein LOC411277 isoform X10 [Apis mellifera]	-	-	-	-	-	-	-
miR-281-x	XM_006564633.3	609	628	-20.42	tTCTCTCG-TAGCTA-CTGTtt	x|||||||x|||x||x||||xx	aAGAGAGCTATCCATCGACAgt	AGAP005037	XP_006564696.2 uncharacterized protein LOC411277 isoform X11 [Apis mellifera]	-	-	-	-	-	-	-
miR-281-x	XM_006564634.3	609	628	-20.42	tTCTCTCG-TAGCTA-CTGTtt	x|||||||x|||x||x||||xx	aAGAGAGCTATCCATCGACAgt	AGAP005037	XP_006564697.2 uncharacterized protein LOC411277 isoform X12 [Apis mellifera]	-	-	-	-	-	-	-
miR-281-x	XM_006564635.3	609	628	-20.42	tTCTCTCG-TAGCTA-CTGTtt	x|||||||x|||x||x||||xx	aAGAGAGCTATCCATCGACAgt	AGAP005037	XP_006564698.2 uncharacterized protein LOC411277 isoform X13 [Apis mellifera]	-	-	-	-	-	-	-
miR-281-x	XM_006564636.3	609	628	-20.42	tTCTCTCG-TAGCTA-CTGTtt	x|||||||x|||x||x||||xx	aAGAGAGCTATCCATCGACAgt	AGAP005037	XP_006564699.2 uncharacterized protein LOC411277 isoform X14 [Apis mellifera]	-	-	-	-	-	-	-
miR-281-x	XM_006564638.3	609	628	-20.42	tTCTCTCG-TAGCTA-CTGTtt	x|||||||x|||x||x||||xx	aAGAGAGCTATCCATCGACAgt	AGAP005037	XP_006564701.2 uncharacterized protein LOC411277 isoform X15 [Apis mellifera]	-	-	-	-	-	-	-
miR-281-x	XM_006564640.3	609	628	-20.42	tTCTCTCG-TAGCTA-CTGTtt	x|||||||x|||x||x||||xx	aAGAGAGCTATCCATCGACAgt	AGAP005037	XP_006564703.2 uncharacterized protein LOC411277 isoform X16 [Apis mellifera]	-	-	-	-	-	-	-
miR-281-x	XM_006564641.3	609	628	-20.42	tTCTCTCG-TAGCTA-CTGTtt	x|||||||x|||x||x||||xx	aAGAGAGCTATCCATCGACAgt	AGAP005037	XP_006564704.2 uncharacterized protein LOC411277 isoform X17 [Apis mellifera]	-	-	-	-	-	-	-
miR-281-x	XM_006564642.3	609	628	-20.42	tTCTCTCG-TAGCTA-CTGTtt	x|||||||x|||x||x||||xx	aAGAGAGCTATCCATCGACAgt	AGAP005037	XP_006564705.2 uncharacterized protein LOC411277 isoform X18 [Apis mellifera]	-	-	-	-	-	-	-
miR-281-x	XM_006564643.3	609	628	-20.42	tTCTCTCG-TAGCTA-CTGTtt	x|||||||x|||x||x||||xx	aAGAGAGCTATCCATCGACAgt	AGAP005037	XP_006564706.2 uncharacterized protein LOC411277 isoform X19 [Apis mellifera]	-	-	-	-	-	-	-
miR-281-x	XM_006564644.3	609	628	-20.42	tTCTCTCG-TAGCTA-CTGTtt	x|||||||x|||x||x||||xx	aAGAGAGCTATCCATCGACAgt	AGAP005037	XP_006564707.2 uncharacterized protein LOC411277 isoform X20 [Apis mellifera]	-	-	-	-	-	-	-
miR-281-x	XM_006564647.3	609	628	-20.42	tTCTCTCG-TAGCTA-CTGTtt	x|||||||x|||x||x||||xx	aAGAGAGCTATCCATCGACAgt	AGAP005037	XP_006564710.2 uncharacterized protein LOC411277 isoform X21 [Apis mellifera]	-	-	-	-	-	-	-
miR-281-x	XM_006564767.3	70	90	-19.53	cTCTCTCGAT-GGCATTTGTag	x|||||||||x||x|x:|||xx	aAGAGAGCTATCCATCGACAgt	NOVA1	XP_006564830.1 RNA-binding protein Nova-1 isoform X2 [Apis mellifera]	-	-	-	-	GO:0000312//plastid small ribosomal subunit;GO:0022627//cytosolic small ribosomal subunit	GO:0003723//RNA binding;GO:0003735//structural constituent of ribosome;GO:0004654//polyribonucleotide nucleotidyltransferase activity	GO:0006402//mRNA catabolic process;GO:0006412//translation
miR-281-x	XM_006564769.3	306	326	-19.53	cTCTCTCGAT-GGCATTTGTag	x|||||||||x||x|x:|||xx	aAGAGAGCTATCCATCGACAgt	NOVA1	XP_006564832.1 RNA-binding protein Nova-1 isoform X4 [Apis mellifera]	-	-	-	-	GO:0000312//plastid small ribosomal subunit;GO:0022627//cytosolic small ribosomal subunit	GO:0003723//RNA binding;GO:0003735//structural constituent of ribosome;GO:0004654//polyribonucleotide nucleotidyltransferase activity	GO:0006402//mRNA catabolic process;GO:0006412//translation
miR-281-x	XM_006565194.3	140	164	-22.08	tTCTCTCGCACTATTGGAGCTGgct	x|||||||x|x||xx|x|||||xxx	aAGAGAGC-T-ATC-CATCGACagt	PKNOX2	XP_001120618.1 homeobox protein PKNOX2 isoform X1 [Apis mellifera]	-	-	-	-	-	GO:0003677//DNA binding	GO:0006355//regulation of transcription, DNA-templated
miR-281-x	XM_006565195.3	140	164	-22.08	tTCTCTCGCACTATTGGAGCTGgct	x|||||||x|x||xx|x|||||xxx	aAGAGAGC-T-ATC-CATCGACagt	PKNOX2	XP_006565258.1 homeobox protein PKNOX2 isoform X2 [Apis mellifera]	-	-	-	-	-	GO:0003677//DNA binding	GO:0006355//regulation of transcription, DNA-templated
miR-281-x	XM_006565204.3	71	94	-16.31	tTCTCTCGCTATTTTTAGCaagtt	x|||||||x||xx|xx|||xxxxx	aAGAGAGCTATCCA--TCGacagt	Gnptab	XP_625103.3 N-acetylglucosamine-1-phosphotransferase subunits alpha/beta isoform X1 [Apis mellifera]	Cellular Processes	Transport and catabolism	ko04142//Lysosome	K08239	-	GO:0005509//calcium ion binding;GO:0016772//transferase activity, transferring phosphorus-containing groups	-
miR-281-x	XM_006565341.3	237	262	-11.06	aTCTCTCGTCGTGATAA-TATTTGTat	x|||||||xxxxx|||xx||x:|||xx	aAGAGAGC-----TATCCATCGACAgt	POLR3C	XP_006565404.1 DNA-directed RNA polymerase III subunit RPC3 [Apis mellifera]	Organismal Systems;Genetic Information Processing	Immune system;Transcription	ko04623//Cytosolic DNA-sensing pathway;ko03020//RNA polymerase	K03023;K03023	-	GO:0003677//DNA binding;GO:0004674//protein serine/threonine kinase activity;GO:0005524//ATP binding	GO:0006351//transcription, DNA-templated;GO:0006468//protein phosphorylation
miR-281-x	XM_006565587.3	3963	3984	-13.25	gTCTCTCGCTCGTTTGCTcgct	x|||||||x|x|x|x|||xxxx	aAGAGAGCTATCCATCGAcagt	epha4-a	XP_006565650.1 eph receptor tyrosine kinase isoform X1 [Apis mellifera]	Organismal Systems;Organismal Systems	Development;Development and regeneration	ko04360//Axon guidance;ko04361//Axon regeneration	K05110;K05110	-	GO:0003993//acid phosphatase activity;GO:0004672//protein kinase activity;GO:0005515//protein binding;GO:0005524//ATP binding;GO:0046872//metal ion binding	GO:0006468//protein phosphorylation
miR-281-x	XM_006565588.3	3963	3984	-13.25	gTCTCTCGCTCGTTTGCTcgct	x|||||||x|x|x|x|||xxxx	aAGAGAGCTATCCATCGAcagt	epha4-a	XP_006565651.1 eph receptor tyrosine kinase isoform X2 [Apis mellifera]	Organismal Systems;Organismal Systems	Development;Development and regeneration	ko04360//Axon guidance;ko04361//Axon regeneration	K05110;K05110	-	GO:0003993//acid phosphatase activity;GO:0004672//protein kinase activity;GO:0005515//protein binding;GO:0005524//ATP binding;GO:0046872//metal ion binding	GO:0006468//protein phosphorylation
miR-281-x	XM_006565589.3	3963	3984	-13.25	gTCTCTCGCTCGTTTGCTcgct	x|||||||x|x|x|x|||xxxx	aAGAGAGCTATCCATCGAcagt	epha4-a	XP_006565652.1 eph receptor tyrosine kinase isoform X3 [Apis mellifera]	Organismal Systems;Organismal Systems	Development;Development and regeneration	ko04360//Axon guidance;ko04361//Axon regeneration	K05110;K05110	-	GO:0003993//acid phosphatase activity;GO:0004672//protein kinase activity;GO:0005515//protein binding;GO:0005524//ATP binding;GO:0046872//metal ion binding	GO:0006468//protein phosphorylation
miR-281-x	XM_006565590.3	3963	3984	-13.25	gTCTCTCGCTCGTTTGCTcgct	x|||||||x|x|x|x|||xxxx	aAGAGAGCTATCCATCGAcagt	epha4-a	XP_006565653.1 eph receptor tyrosine kinase isoform X4 [Apis mellifera]	Organismal Systems;Organismal Systems	Development;Development and regeneration	ko04360//Axon guidance;ko04361//Axon regeneration	K05110;K05110	-	GO:0003993//acid phosphatase activity;GO:0004672//protein kinase activity;GO:0005515//protein binding;GO:0005524//ATP binding;GO:0046872//metal ion binding	GO:0006468//protein phosphorylation
miR-281-x	XM_006565591.3	3963	3984	-13.25	gTCTCTCGCTCGTTTGCTcgct	x|||||||x|x|x|x|||xxxx	aAGAGAGCTATCCATCGAcagt	epha4-a	XP_006565654.1 eph receptor tyrosine kinase isoform X5 [Apis mellifera]	Organismal Systems;Organismal Systems	Development;Development and regeneration	ko04360//Axon guidance;ko04361//Axon regeneration	K05110;K05110	-	GO:0003993//acid phosphatase activity;GO:0004672//protein kinase activity;GO:0005515//protein binding;GO:0005524//ATP binding;GO:0046872//metal ion binding	GO:0006468//protein phosphorylation
miR-281-x	XM_006565592.3	3963	3984	-13.25	gTCTCTCGCTCGTTTGCTcgct	x|||||||x|x|x|x|||xxxx	aAGAGAGCTATCCATCGAcagt	epha4-a	XP_006565655.1 eph receptor tyrosine kinase isoform X6 [Apis mellifera]	Organismal Systems;Organismal Systems	Development;Development and regeneration	ko04360//Axon guidance;ko04361//Axon regeneration	K05110;K05110	-	GO:0003993//acid phosphatase activity;GO:0004672//protein kinase activity;GO:0005515//protein binding;GO:0005524//ATP binding;GO:0046872//metal ion binding	GO:0006468//protein phosphorylation
miR-281-x	XM_006565593.3	3963	3984	-13.25	gTCTCTCGCTCGTTTGCTcgct	x|||||||x|x|x|x|||xxxx	aAGAGAGCTATCCATCGAcagt	epha4-a	XP_006565656.1 eph receptor tyrosine kinase isoform X8 [Apis mellifera]	Organismal Systems;Organismal Systems	Development;Development and regeneration	ko04360//Axon guidance;ko04361//Axon regeneration	K05110;K05110	-	GO:0003993//acid phosphatase activity;GO:0004672//protein kinase activity;GO:0005515//protein binding;GO:0005524//ATP binding;GO:0046872//metal ion binding	GO:0006468//protein phosphorylation
miR-281-x	XM_006565594.3	3963	3984	-13.25	gTCTCTCGCTCGTTTGCTcgct	x|||||||x|x|x|x|||xxxx	aAGAGAGCTATCCATCGAcagt	epha4-a	XP_006565657.1 eph receptor tyrosine kinase isoform X10 [Apis mellifera]	Organismal Systems;Organismal Systems	Development;Development and regeneration	ko04360//Axon guidance;ko04361//Axon regeneration	K05110;K05110	-	GO:0003993//acid phosphatase activity;GO:0004672//protein kinase activity;GO:0005515//protein binding;GO:0005524//ATP binding;GO:0046872//metal ion binding	GO:0006468//protein phosphorylation
miR-281-x	XM_006565595.3	3963	3984	-13.25	gTCTCTCGCTCGTTTGCTcgct	x|||||||x|x|x|x|||xxxx	aAGAGAGCTATCCATCGAcagt	epha4-a	XP_006565658.1 eph receptor tyrosine kinase isoform X11 [Apis mellifera]	Organismal Systems;Organismal Systems	Development;Development and regeneration	ko04360//Axon guidance;ko04361//Axon regeneration	K05110;K05110	-	GO:0003993//acid phosphatase activity;GO:0004672//protein kinase activity;GO:0005515//protein binding;GO:0005524//ATP binding;GO:0046872//metal ion binding	GO:0006468//protein phosphorylation
miR-281-x	XM_006565597.3	3963	3984	-13.25	gTCTCTCGCTCGTTTGCTcgct	x|||||||x|x|x|x|||xxxx	aAGAGAGCTATCCATCGAcagt	epha4-a	XP_006565660.1 eph receptor tyrosine kinase isoform X13 [Apis mellifera]	Organismal Systems;Organismal Systems	Development;Development and regeneration	ko04360//Axon guidance;ko04361//Axon regeneration	K05110;K05110	-	GO:0003993//acid phosphatase activity;GO:0004672//protein kinase activity;GO:0005515//protein binding;GO:0005524//ATP binding;GO:0046872//metal ion binding	GO:0006468//protein phosphorylation
miR-281-x	XM_006565598.3	3963	3984	-13.25	gTCTCTCGCTCGTTTGCTcgct	x|||||||x|x|x|x|||xxxx	aAGAGAGCTATCCATCGAcagt	epha4-a	XP_006565661.1 eph receptor tyrosine kinase isoform X14 [Apis mellifera]	Organismal Systems;Organismal Systems	Development;Development and regeneration	ko04360//Axon guidance;ko04361//Axon regeneration	K05110;K05110	-	GO:0003993//acid phosphatase activity;GO:0004672//protein kinase activity;GO:0005515//protein binding;GO:0005524//ATP binding;GO:0046872//metal ion binding	GO:0006468//protein phosphorylation
miR-281-x	XM_006565599.3	3963	3984	-13.25	gTCTCTCGCTCGTTTGCTcgct	x|||||||x|x|x|x|||xxxx	aAGAGAGCTATCCATCGAcagt	epha4-a	XP_006565662.1 eph receptor tyrosine kinase isoform X15 [Apis mellifera]	Organismal Systems;Organismal Systems	Development;Development and regeneration	ko04360//Axon guidance;ko04361//Axon regeneration	K05110;K05110	-	GO:0003993//acid phosphatase activity;GO:0004672//protein kinase activity;GO:0005515//protein binding;GO:0005524//ATP binding;GO:0046872//metal ion binding	GO:0006468//protein phosphorylation
miR-281-x	XM_006565600.3	3963	3984	-13.25	gTCTCTCGCTCGTTTGCTcgct	x|||||||x|x|x|x|||xxxx	aAGAGAGCTATCCATCGAcagt	epha4-a	XP_006565663.1 eph receptor tyrosine kinase isoform X16 [Apis mellifera]	Organismal Systems;Organismal Systems	Development;Development and regeneration	ko04360//Axon guidance;ko04361//Axon regeneration	K05110;K05110	-	GO:0003993//acid phosphatase activity;GO:0004672//protein kinase activity;GO:0005515//protein binding;GO:0005524//ATP binding;GO:0046872//metal ion binding	GO:0006468//protein phosphorylation
miR-281-x	XM_006565601.3	3963	3984	-13.25	gTCTCTCGCTCGTTTGCTcgct	x|||||||x|x|x|x|||xxxx	aAGAGAGCTATCCATCGAcagt	epha4-a	XP_006565664.1 eph receptor tyrosine kinase isoform X17 [Apis mellifera]	Organismal Systems;Organismal Systems	Development;Development and regeneration	ko04360//Axon guidance;ko04361//Axon regeneration	K05110;K05110	-	GO:0003993//acid phosphatase activity;GO:0004672//protein kinase activity;GO:0005515//protein binding;GO:0005524//ATP binding;GO:0046872//metal ion binding	GO:0006468//protein phosphorylation
miR-281-x	XM_006565720.3	1084	1105	-11.19	tTCTCTCGCTcataaaaagaaa	x|||||||x|xxxxxxxxxxxx	aAGAGAGCTAtccatcgacagt	--	XP_006565783.1 uncharacterized protein LOC102655815 [Apis mellifera]	-	-	-	-	-	-	-
miR-281-x	XM_006565736.3	81	105	-22.21	gTCTCTCGACAGAGATAGCTCGTat	x||||||||x||x|x|||||x||xx	aAGAGAGCTATC-C-ATCGA-CAgt	Smg1	XP_026300905.1 serine/threonine-protein kinase SMG1 isoform X1 [Apis mellifera]	Genetic Information Processing	Translation	ko03015//mRNA surveillance pathway	K08873	-	GO:0004674//protein serine/threonine kinase activity;GO:0005515//protein binding;GO:0044877//macromolecular complex binding	GO:0000184//nuclear-transcribed mRNA catabolic process, nonsense-mediated decay;GO:0016310//phosphorylation
miR-281-x	XM_006565737.3	81	105	-22.21	gTCTCTCGACAGAGATAGCTCGTat	x||||||||x||x|x|||||x||xx	aAGAGAGCTATC-C-ATCGA-CAgt	Smg1	XP_026300905.1 serine/threonine-protein kinase SMG1 isoform X1 [Apis mellifera]	Genetic Information Processing	Translation	ko03015//mRNA surveillance pathway	K08873	-	GO:0004674//protein serine/threonine kinase activity;GO:0005515//protein binding;GO:0044877//macromolecular complex binding	GO:0000184//nuclear-transcribed mRNA catabolic process, nonsense-mediated decay;GO:0016310//phosphorylation
miR-281-x	XM_006565857.3	3365	3385	-14.58	cTCTCTCGG-AGcacacaggca	x|||||||:x||xxxxxxxxxx	aAGAGAGCTATCcatcgacagt	Sap47	XP_006565917.1 synapse-associated protein 1 isoform X1 [Apis mellifera]	-	-	-	-	-	GO:0004392//heme oxygenase (decyclizing) activity	GO:0006788//heme oxidation;GO:0055114//oxidation-reduction process
miR-281-x	XM_006565868.3	49	70	-12.38	aTCTCTCGCCCGTTACTTcgct	x|||||||xxx|x||x:|xxxx	aAGAGAGCTATCCATCGAcagt	Dpys	XP_006565931.3 dihydropyrimidinase isoform X1 [Apis mellifera]	Metabolism;Metabolism;Metabolism;Metabolism;Metabolism	Global and overview maps;Xenobiotics biodegradation and metabolism;Nucleotide metabolism;Metabolism of other amino acids;Metabolism of cofactors and vitamins	ko01100//Metabolic pathways;ko00983//Drug metabolism - other enzymes;ko00240//Pyrimidine metabolism;ko00410//beta-Alanine metabolism;ko00770//Pantothenate and CoA biosynthesis	K01464;K01464;K01464;K01464;K01464	GO:0005575//cellular_component	GO:0000034//adenine deaminase activity;GO:0003674//molecular_function;GO:0004061//arylformamidase activity;GO:0004151//dihydroorotase activity;GO:0004157//dihydropyrimidinase activity;GO:0008448//N-acetylglucosamine-6-phosphate deacetylase activity;GO:0008798//beta-aspartyl-peptidase activity;GO:0008892//guanine deaminase activity;GO:0009039//urease activity;GO:0016151//nickel cation binding;GO:0…	GO:0006040//amino sugar metabolic process;GO:0006147//guanine catabolic process;GO:0006168//adenine salvage;GO:0006508//proteolysis;GO:0006548//histidine catabolic process;GO:0008150//biological_process;GO:0008152//metabolic process;GO:0009220//pyrimidine ribonucleotide biosynthetic process;GO:0019441//tryptophan catabolic process to kynurenine;GO:0019627//urea metabolic process;GO:0019634//organ…
miR-281-x	XM_006565869.3	49	70	-12.38	aTCTCTCGCCCGTTACTTcgct	x|||||||xxx|x||x:|xxxx	aAGAGAGCTATCCATCGAcagt	Dpys	XP_006565932.2 dihydropyrimidinase isoform X2 [Apis mellifera]	Metabolism;Metabolism;Metabolism;Metabolism;Metabolism	Global and overview maps;Xenobiotics biodegradation and metabolism;Nucleotide metabolism;Metabolism of other amino acids;Metabolism of cofactors and vitamins	ko01100//Metabolic pathways;ko00983//Drug metabolism - other enzymes;ko00240//Pyrimidine metabolism;ko00410//beta-Alanine metabolism;ko00770//Pantothenate and CoA biosynthesis	K01464;K01464;K01464;K01464;K01464	GO:0005575//cellular_component	GO:0000034//adenine deaminase activity;GO:0003674//molecular_function;GO:0004061//arylformamidase activity;GO:0004151//dihydroorotase activity;GO:0004157//dihydropyrimidinase activity;GO:0008448//N-acetylglucosamine-6-phosphate deacetylase activity;GO:0008798//beta-aspartyl-peptidase activity;GO:0008892//guanine deaminase activity;GO:0009039//urease activity;GO:0016151//nickel cation binding;GO:0…	GO:0006040//amino sugar metabolic process;GO:0006147//guanine catabolic process;GO:0006168//adenine salvage;GO:0006508//proteolysis;GO:0006548//histidine catabolic process;GO:0008150//biological_process;GO:0008152//metabolic process;GO:0009220//pyrimidine ribonucleotide biosynthetic process;GO:0019441//tryptophan catabolic process to kynurenine;GO:0019627//urea metabolic process;GO:0019634//organ…
miR-281-x	XM_006565991.3	1593	1614	-11.4	tTCTCTCGTTttccctaattcc	x|||||||x|xxxxxxxxxxxx	aAGAGAGCTAtccatcgacagt	Pum2	XP_006566054.1 pumilio homolog 2 isoform X1 [Apis mellifera]	-	-	-	-	-	GO:0003723//RNA binding;GO:0008690//3-deoxy-manno-octulosonate cytidylyltransferase activity	GO:0009244//lipopolysaccharide core region biosynthetic process
miR-281-x	XM_006565992.3	1593	1614	-11.4	tTCTCTCGTTttccctaattcc	x|||||||x|xxxxxxxxxxxx	aAGAGAGCTAtccatcgacagt	Pum2	XP_006566055.1 pumilio homolog 2 isoform X2 [Apis mellifera]	-	-	-	-	-	GO:0003723//RNA binding;GO:0008690//3-deoxy-manno-octulosonate cytidylyltransferase activity	GO:0009244//lipopolysaccharide core region biosynthetic process
miR-281-x	XM_006566001.3	533	554	-15.43	tTCTCTCGCTGtttttatattt	x|||||||x|:xxxxxxxxxxx	aAGAGAGCTATccatcgacagt	--	XP_006566064.1 uncharacterized protein LOC725082 isoform X2 [Apis mellifera]	-	-	-	-	-	-	-
miR-281-x	XM_006566014.3	1189	1210	-11.09	cTCTCTCGTTCTCTCTCTCTtt	x|||||||x|xxx|xx||x|xx	aAGAGAGCTATCCATCGACAgt	FHL2	XP_006566077.2 prickle planar cell polarity protein 3-A isoform X5 [Apis mellifera]	-	-	-	-	-	GO:0008270//zinc ion binding	-
miR-281-x	XM_006566016.3	1189	1210	-11.09	cTCTCTCGTTCTCTCTCTCTtt	x|||||||x|xxx|xx||x|xx	aAGAGAGCTATCCATCGACAgt	FHL2	XP_006566079.2 four and a half LIM domains protein 2 isoform X7 [Apis mellifera]	-	-	-	-	-	GO:0008270//zinc ion binding	-
miR-281-x	XM_006566019.3	1189	1210	-11.09	cTCTCTCGTTCTCTCTCTCTtt	x|||||||x|xxx|xx||x|xx	aAGAGAGCTATCCATCGACAgt	FHL2	XP_006566082.1 four and a half LIM domains protein 2 isoform X12 [Apis mellifera]	-	-	-	-	-	-	-
miR-281-x	XM_006566073.3	4816	4837	-18.16	cTCTCTCGAGAAGTGTTTtgct	x||||||||x|x||:x:|xxxx	aAGAGAGCTATCCATCGAcagt	--	XP_006566136.2 uncharacterized protein LOC100576882 [Apis mellifera]	-	-	-	-	-	GO:0005262//calcium channel activity	GO:0098703//calcium ion import across plasma membrane
miR-281-x	XM_006566202.3	367	387	-12.86	cTCTCTCG-TCGCGCGTTTTtt	x|||||||x|x|xxx|:|x|xx	aAGAGAGCTATCCATCGACAgt	--	XP_006566265.2 protein windpipe [Apis mellifera]	-	-	-	-	-	GO:0005515//protein binding	-
miR-281-x	XM_006566378.3	393	414	-11.14	cTCTCTCGTTttcacttttcaa	x|||||||x|xxxxxxxxxxxx	aAGAGAGCTAtccatcgacagt	Dpp6	XP_006566441.1 dipeptidyl aminopeptidase-like protein 6 isoform X2 [Apis mellifera]	-	-	-	-	-	GO:0008236//serine-type peptidase activity;GO:0016787//hydrolase activity	GO:0006508//proteolysis
miR-281-x	XM_006566380.3	393	414	-11.14	cTCTCTCGTTttcacttttcaa	x|||||||x|xxxxxxxxxxxx	aAGAGAGCTAtccatcgacagt	Dpp6	XP_006566443.1 dipeptidyl aminopeptidase-like protein 6 isoform X3 [Apis mellifera]	-	-	-	-	-	GO:0008236//serine-type peptidase activity;GO:0016787//hydrolase activity	GO:0006508//proteolysis
miR-281-x	XM_006566381.3	393	414	-11.14	cTCTCTCGTTttcacttttcaa	x|||||||x|xxxxxxxxxxxx	aAGAGAGCTAtccatcgacagt	Dpp6	XP_006566444.1 dipeptidyl aminopeptidase-like protein 6 isoform X4 [Apis mellifera]	-	-	-	-	-	GO:0008236//serine-type peptidase activity;GO:0016787//hydrolase activity	GO:0006508//proteolysis
miR-281-x	XM_006566635.3	885	906	-11.34	cTCTCTCGGCAccgacataagc	x|||||||:x|xxxxxxxxxxx	aAGAGAGCTATccatcgacagt	Madm	XP_006566698.1 nuclear receptor-binding protein homolog [Apis mellifera]	-	-	-	-	-	GO:0004672//protein kinase activity;GO:0004674//protein serine/threonine kinase activity;GO:0005524//ATP binding	GO:0006468//protein phosphorylation
miR-281-x	XM_006566736.3	137	158	-11.4	tTCTCTCGTTcctctacaatac	x|||||||x|xxxxxxxxxxxx	aAGAGAGCTAtccatcgacagt	alphaSnap	XP_006566799.1 alpha-soluble NSF attachment protein [Apis mellifera]	Organismal Systems	Nervous system	ko04721//Synaptic vesicle cycle	K15296	-	GO:0005515//protein binding	-
miR-281-x	XM_006566788.3	1410	1431	-15.54	tTCTCTCGGTCCGCTCCTTTag	x|||||||:|xx|xxx||x|xx	aAGAGAGCTATCCATCGACAgt	znf395	XP_006566851.1 zinc finger protein 395 isoform X2 [Apis mellifera]	-	-	-	-	-	-	-
miR-281-x	XM_006567244.3	276	299	-14.41	gTCTCTCGCGATAGTAAGaaaaga	x|||||||xx||||xx||xxxxxx	aAGAGAGC--TATCCATCgacagt	rnf8-B	XP_006567307.1 E3 ubiquitin-protein ligase RNF8 isoform X2 [Apis mellifera]	-	-	-	-	GO:0000109//nucleotide-excision repair complex	GO:0003723//RNA binding;GO:0005515//protein binding;GO:0008270//zinc ion binding;GO:0046872//metal ion binding;GO:0061630//ubiquitin protein ligase activity	GO:0006289//nucleotide-excision repair
miR-281-x	XM_006567468.3	1577	1598	-11.69	cTCTCTCGCTCTCTCTCTCTca	x|||||||x|xxx|xx||x|xx	aAGAGAGCTATCCATCGACAgt	--	XP_006567531.1 uncharacterized protein LOC725634 isoform X1 [Apis mellifera]	-	-	-	-	-	GO:0005102//receptor binding	-
miR-281-x	XM_006567670.3	71	92	-14.96	cTCTCTCGAAACATCGgcctaa	x||||||||x|xx|x|xxxxxx	aAGAGAGCTATCCATCgacagt	--	XP_006567733.2 ecdysone-induced protein 74EF-like [Apis mellifera]	-	-	-	-	-	-	-
miR-281-x	XM_006567943.3	1216	1239	-18.57	tTCTCTCGTTTCTCTAAGCTGcct	x|||||||x|xxxx||x||||xxx	aAGAGAGCTATCC-AT-CGACagt	Pdk1	XP_016769980.1 3-phosphoinositide-dependent protein kinase 1 isoform X2 [Apis mellifera]	Human Diseases;Environmental Information Processing;Organismal Systems;Environmental Information Processing;Organismal Systems;Cellular Processes;Organismal Systems;Cellular Processes;Human Diseases;Environmental Information Processing;Environmental Information Processing;Human Diseases;Environmental Information Processing;Organismal Systems;Human Diseases;Human Diseases;Cellular Processes;Organi…	Cancers;Signal transduction;Endocrine system;Signal transduction;Endocrine system;Cellular community - eukaryotes;Nervous system;Transport and catabolism;Endocrine and metabolic diseases;Signal transduction;Signal transduction;Cancers;Signal transduction;Immune system;Cancers;Cancers;Cell growth and death;Endocrine system;Infectious diseases;Drug resistance;Cancers;Excretory system;Immune system	ko05205//Proteoglycans in cancer;ko04151//PI3K-Akt signaling pathway;ko04919//Thyroid hormone signaling pathway;ko04150//mTOR signaling pathway;ko04910//Insulin signaling pathway;ko04510//Focal adhesion;ko04722//Neurotrophin signaling pathway;ko04140//Autophagy - animal;ko04931//Insulin resistance;ko04152//AMPK signaling pathway;ko04068//FoxO signaling pathway;ko05231//Choline metabolism in cance…	K06276;K06276;K06276;K06276;K06276;K06276;K06276;K06276;K06276;K06276;K06276;K06276;K06276;K06276;K06276;K06276;K06276;K06276;K06276;K06276;K06276;K06276;K06276	GO:0000124//SAGA complex	GO:0003712//transcription cofactor activity;GO:0004672//protein kinase activity;GO:0005524//ATP binding	GO:0006468//protein phosphorylation
miR-281-x	XM_006567988.3	1045	1066	-11.4	tTCTCTCGTTAttccataaatt	x|||||||x||xxxxxxxxxxx	aAGAGAGCTATccatcgacagt	N	XP_006568051.2 LOW QUALITY PROTEIN: neurogenic locus Notch protein [Apis mellifera]	Human Diseases;Human Diseases;Organismal Systems;Organismal Systems;Human Diseases;Human Diseases;Human Diseases;Organismal Systems;Environmental Information Processing;Organismal Systems;Human Diseases	Cancers;Infectious diseases;Endocrine system;Development and regeneration;Cancers;Cancers;Drug resistance;Development;Signal transduction;Immune system;Neurodegenerative diseases	ko05200//Pathways in cancer;ko05165//Human papillomavirus infection;ko04919//Thyroid hormone signaling pathway;ko04361//Axon regeneration;ko05206//MicroRNAs in cancer;ko05224//Breast cancer;ko01522//Endocrine resistance;ko04320//Dorso-ventral axis formation;ko04330//Notch signaling pathway;ko04658//Th1 and Th2 cell differentiation;ko05020//Prion diseases	K02599;K02599;K02599;K02599;K02599;K02599;K02599;K02599;K02599;K02599;K02599	GO:0005672//transcription factor TFIIA complex;GO:0016021//integral component of membrane;GO:0031237//intrinsic component of periplasmic side of plasma membrane	GO:0004113//2',3'-cyclic-nucleotide 3'-phosphodiesterase activity;GO:0004190//aspartic-type endopeptidase activity;GO:0005215//transporter activity;GO:0005509//calcium ion binding;GO:0005515//protein binding;GO:0008855//exodeoxyribonuclease VII activity;GO:0019903//protein phosphatase binding;GO:0046872//metal ion binding;GO:0051731//polynucleotide 5'-hydroxyl-kinase activity	GO:0006367//transcription initiation from RNA polymerase II promoter;GO:0006810//transport;GO:0007219//Notch signaling pathway;GO:0007275//multicellular organism development;GO:0009405//pathogenesis;GO:0016485//protein processing;GO:0030154//cell differentiation;GO:0042245//RNA repair;GO:0043666//regulation of phosphoprotein phosphatase activity;GO:0055085//transmembrane transport
miR-281-x	XM_006568058.3	1190	1211	-17.45	gTCTCTCGAGCGTGCA-CTGgat	x||||||||xx|x|x|x|||xxx	aAGAGAGCTATC-CATCGACagt	TP53INP2	XP_006568121.2 tumor protein p53-inducible nuclear protein 2 isoform X1 [Apis mellifera]	Cellular Processes	Transport and catabolism	ko04140//Autophagy - animal	K21247	-	-	-
miR-281-x	XM_006568059.3	1190	1211	-17.45	gTCTCTCGAGCGTGCA-CTGgat	x||||||||xx|x|x|x|||xxx	aAGAGAGCTATC-CATCGACagt	TP53INP2	XP_006568121.2 tumor protein p53-inducible nuclear protein 2 isoform X1 [Apis mellifera]	Cellular Processes	Transport and catabolism	ko04140//Autophagy - animal	K21247	-	-	-
miR-281-x	XM_006568060.3	1190	1211	-17.45	gTCTCTCGAGCGTGCA-CTGgat	x||||||||xx|x|x|x|||xxx	aAGAGAGCTATC-CATCGACagt	TP53INP2	XP_006568121.2 tumor protein p53-inducible nuclear protein 2 isoform X1 [Apis mellifera]	Cellular Processes	Transport and catabolism	ko04140//Autophagy - animal	K21247	-	-	-
miR-281-x	XM_006568287.3	11407	11428	-14.36	gTCTCTCGCTctccagagcgcg	x|||||||x|xxxxxxxxxxxx	aAGAGAGCTAtccatcgacagt	cpo	XP_006568350.1 protein couch potato isoform X3 [Apis mellifera]	-	-	-	-	-	GO:0003676//nucleic acid binding	GO:0008380//RNA splicing
miR-281-x	XM_006568290.3	11385	11406	-14.36	gTCTCTCGCTctccagagcgcg	x|||||||x|xxxxxxxxxxxx	aAGAGAGCTAtccatcgacagt	cpo	XP_006568353.1 protein couch potato isoform X7 [Apis mellifera]	-	-	-	-	-	GO:0003676//nucleic acid binding	GO:0008380//RNA splicing
miR-281-x	XM_006568351.3	1407	1430	-16.29	gTCTCTCGAATTATTAGTCAGTta	x||||||||x|xxx|||x|x||xx	aAGAGAGCT-ATCCATC-GACAgt	Srpk1	XP_006568414.1 SRSF protein kinase 3 isoform X1 [Apis mellifera]	Human Diseases	Infectious diseases	ko05168//Herpes simplex infection	K15409	-	GO:0004672//protein kinase activity;GO:0005524//ATP binding	GO:0006468//protein phosphorylation
miR-281-x	XM_006568352.3	1407	1430	-16.29	gTCTCTCGAATTATTAGTCAGTta	x||||||||x|xxx|||x|x||xx	aAGAGAGCT-ATCCATC-GACAgt	SRPK2	XP_006568415.1 SRSF protein kinase 3 isoform X2 [Apis mellifera]	Human Diseases	Infectious diseases	ko05168//Herpes simplex infection	K15409	-	GO:0004672//protein kinase activity;GO:0005524//ATP binding	GO:0006468//protein phosphorylation
miR-281-x	XM_006568843.3	81	101	-13.46	cTCTCTCGC-AGGccaaatctt	x|||||||xx|||xxxxxxxxx	aAGAGAGCTATCCatcgacagt	UBE2R2	XP_006568906.1 ubiquitin-conjugating enzyme E2 R2 isoform X2 [Apis mellifera]	Genetic Information Processing	Folding, sorting and degradation	ko04120//Ubiquitin mediated proteolysis	K02207	-	-	-
miR-281-x	XM_006568881.3	3024	3044	-18.85	tTCTCTCGGTGAGC-GCTATta	x|||||||:|:x|xx|||x|xx	aAGAGAGCTATCCATCGACAgt	HIPK2	XP_006568944.2 homeodomain-interacting protein kinase 2 isoform X1 [Apis mellifera]	Cellular Processes	Cell growth and death	ko04218//Cellular senescence	K08826	-	GO:0004672//protein kinase activity;GO:0005524//ATP binding	GO:0006468//protein phosphorylation
miR-281-x	XM_006568884.3	3024	3044	-18.85	tTCTCTCGGTGAGC-GCTATta	x|||||||:|:x|xx|||x|xx	aAGAGAGCTATCCATCGACAgt	HIPK2	XP_006568947.2 homeodomain-interacting protein kinase 2 isoform X3 [Apis mellifera]	Cellular Processes	Cell growth and death	ko04218//Cellular senescence	K08826	-	GO:0004672//protein kinase activity;GO:0005524//ATP binding	GO:0006468//protein phosphorylation
miR-281-x	XM_006568885.3	3024	3044	-18.85	tTCTCTCGGTGAGC-GCTATta	x|||||||:|:x|xx|||x|xx	aAGAGAGCTATCCATCGACAgt	HIPK2	XP_006568948.2 homeodomain-interacting protein kinase 2 isoform X4 [Apis mellifera]	Cellular Processes	Cell growth and death	ko04218//Cellular senescence	K08826	-	GO:0004672//protein kinase activity;GO:0005524//ATP binding	GO:0006468//protein phosphorylation
miR-281-x	XM_006568887.3	3024	3044	-18.85	tTCTCTCGGTGAGC-GCTATta	x|||||||:|:x|xx|||x|xx	aAGAGAGCTATCCATCGACAgt	HIPK2	XP_006568950.2 homeodomain-interacting protein kinase 2 isoform X6 [Apis mellifera]	Cellular Processes	Cell growth and death	ko04218//Cellular senescence	K08826	-	GO:0004672//protein kinase activity;GO:0005524//ATP binding	GO:0006468//protein phosphorylation
miR-281-x	XM_006568889.3	3024	3044	-18.85	tTCTCTCGGTGAGC-GCTATta	x|||||||:|:x|xx|||x|xx	aAGAGAGCTATCCATCGACAgt	HIPK2	XP_006568952.2 homeodomain-interacting protein kinase 2 isoform X8 [Apis mellifera]	Cellular Processes	Cell growth and death	ko04218//Cellular senescence	K08826	-	GO:0004672//protein kinase activity;GO:0005524//ATP binding	GO:0006468//protein phosphorylation
miR-281-x	XM_006568890.3	3024	3044	-18.85	tTCTCTCGGTGAGC-GCTATta	x|||||||:|:x|xx|||x|xx	aAGAGAGCTATCCATCGACAgt	HIPK2	XP_006568953.2 homeodomain-interacting protein kinase 2 isoform X9 [Apis mellifera]	Cellular Processes	Cell growth and death	ko04218//Cellular senescence	K08826	-	GO:0004672//protein kinase activity;GO:0005524//ATP binding	GO:0006468//protein phosphorylation
miR-281-x	XM_006568891.3	3024	3044	-18.85	tTCTCTCGGTGAGC-GCTATta	x|||||||:|:x|xx|||x|xx	aAGAGAGCTATCCATCGACAgt	HIPK2	XP_006568954.2 homeodomain-interacting protein kinase 2 isoform X10 [Apis mellifera]	Cellular Processes	Cell growth and death	ko04218//Cellular senescence	K08826	-	GO:0004672//protein kinase activity;GO:0005524//ATP binding	GO:0006468//protein phosphorylation
miR-281-x	XM_006568893.3	3024	3044	-18.85	tTCTCTCGGTGAGC-GCTATta	x|||||||:|:x|xx|||x|xx	aAGAGAGCTATCCATCGACAgt	HIPK2	XP_006568956.2 homeodomain-interacting protein kinase 2 isoform X12 [Apis mellifera]	Cellular Processes	Cell growth and death	ko04218//Cellular senescence	K08826	-	GO:0004672//protein kinase activity;GO:0005524//ATP binding	GO:0006468//protein phosphorylation
miR-281-x	XM_006568894.3	3024	3044	-18.85	tTCTCTCGGTGAGC-GCTATta	x|||||||:|:x|xx|||x|xx	aAGAGAGCTATCCATCGACAgt	HIPK2	XP_006568957.2 homeodomain-interacting protein kinase 2 isoform X13 [Apis mellifera]	Cellular Processes	Cell growth and death	ko04218//Cellular senescence	K08826	-	GO:0004672//protein kinase activity;GO:0005524//ATP binding	GO:0006468//protein phosphorylation
miR-281-x	XM_006568895.3	3024	3044	-18.85	tTCTCTCGGTGAGC-GCTATta	x|||||||:|:x|xx|||x|xx	aAGAGAGCTATCCATCGACAgt	HIPK2	XP_006568958.2 homeodomain-interacting protein kinase 2 isoform X14 [Apis mellifera]	Cellular Processes	Cell growth and death	ko04218//Cellular senescence	K08826	-	GO:0004672//protein kinase activity;GO:0005524//ATP binding	GO:0006468//protein phosphorylation
miR-281-x	XM_006568898.3	3024	3044	-18.85	tTCTCTCGGTGAGC-GCTATta	x|||||||:|:x|xx|||x|xx	aAGAGAGCTATCCATCGACAgt	HIPK2	XP_006568961.2 homeodomain-interacting protein kinase 2 isoform X16 [Apis mellifera]	Cellular Processes	Cell growth and death	ko04218//Cellular senescence	K08826	-	GO:0004672//protein kinase activity;GO:0005524//ATP binding	GO:0006468//protein phosphorylation
miR-281-x	XM_006569049.3	5499	5522	-15.96	tTCTCTCGCTTGAGGAAtaacctg	x|||||||x|xx|||x|xxxxxxx	aAGAGAGCTA--TCCATcgacagt	TMEM272	XP_003251317.2 uncharacterized protein LOC100577635 isoform X1 [Apis mellifera]	-	-	-	-	-	-	-
miR-281-x	XM_006569091.3	1	14	-14.14	cTCTCTCGG-AGcag-------	x|||||||:x||xxxxxxxxxx	aAGAGAGCTATCcatcgacagt	feh-1	XP_006569154.1 protein Fe65 homolog isoform X3 [Apis mellifera]	-	-	-	-	-	GO:0005515//protein binding	-
miR-281-x	XM_006569235.3	1954	1976	-10.77	aTCTCTCGCATAcatctatacat	x|||||||x|||xxxxxxxxxxx	aAGAGAGC-TATccatcgacagt	Hs3st5	XP_006569298.1 heparan sulfate glucosamine 3-O-sulfotransferase 1 isoform X1 [Apis mellifera]	Metabolism	Glycan biosynthesis and metabolism	ko00534//Glycosaminoglycan biosynthesis - heparan sulfate / heparin	K08104	GO:0000124//SAGA complex;GO:0016021//integral component of membrane	GO:0003712//transcription cofactor activity;GO:0008146//sulfotransferase activity	-
miR-281-x	XM_006569236.3	1954	1976	-10.77	aTCTCTCGCATAcatctatacat	x|||||||x|||xxxxxxxxxxx	aAGAGAGC-TATccatcgacagt	Hs3st5	XP_006569299.1 heparan sulfate glucosamine 3-O-sulfotransferase 1 isoform X2 [Apis mellifera]	Metabolism	Glycan biosynthesis and metabolism	ko00534//Glycosaminoglycan biosynthesis - heparan sulfate / heparin	K08104	GO:0000124//SAGA complex;GO:0016021//integral component of membrane	GO:0003712//transcription cofactor activity;GO:0008146//sulfotransferase activity	-
miR-281-x	XM_006569237.3	1954	1976	-10.77	aTCTCTCGCATAcatctatacat	x|||||||x|||xxxxxxxxxxx	aAGAGAGC-TATccatcgacagt	Hs3st5	XP_006569299.1 heparan sulfate glucosamine 3-O-sulfotransferase 1 isoform X2 [Apis mellifera]	Metabolism	Glycan biosynthesis and metabolism	ko00534//Glycosaminoglycan biosynthesis - heparan sulfate / heparin	K08104	GO:0000124//SAGA complex;GO:0016021//integral component of membrane	GO:0003712//transcription cofactor activity;GO:0008146//sulfotransferase activity	-
miR-281-x	XM_006569238.3	1954	1976	-10.77	aTCTCTCGCATAcatctatacat	x|||||||x|||xxxxxxxxxxx	aAGAGAGC-TATccatcgacagt	Hs3st5	XP_006569299.1 heparan sulfate glucosamine 3-O-sulfotransferase 1 isoform X2 [Apis mellifera]	Metabolism	Glycan biosynthesis and metabolism	ko00534//Glycosaminoglycan biosynthesis - heparan sulfate / heparin	K08104	GO:0000124//SAGA complex;GO:0016021//integral component of membrane	GO:0003712//transcription cofactor activity;GO:0008146//sulfotransferase activity	-
miR-281-x	XM_006569241.3	1954	1976	-10.77	aTCTCTCGCATAcatctatacat	x|||||||x|||xxxxxxxxxxx	aAGAGAGC-TATccatcgacagt	Hs3st5	XP_006569299.1 heparan sulfate glucosamine 3-O-sulfotransferase 1 isoform X2 [Apis mellifera]	Metabolism	Glycan biosynthesis and metabolism	ko00534//Glycosaminoglycan biosynthesis - heparan sulfate / heparin	K08104	GO:0000124//SAGA complex;GO:0016021//integral component of membrane	GO:0003712//transcription cofactor activity;GO:0008146//sulfotransferase activity	-
miR-281-x	XM_006569427.3	4152	4173	-11.45	aTCTCTCGcgcttaacaatgta	x|||||||xxxxxxxxxxxxxx	aAGAGAGCtatccatcgacagt	Mctp	XP_006569490.2 multiple C2 and transmembrane domain-containing protein isoform X2 [Apis mellifera]	-	-	-	-	GO:0042729//DASH complex;GO:0072686//mitotic spindle	GO:0016773//phosphotransferase activity, alcohol group as acceptor	GO:0000278//mitotic cell cycle;GO:0006468//protein phosphorylation;GO:0019748//secondary metabolic process;GO:0044238//primary metabolic process
miR-281-x	XM_006569428.3	4152	4173	-11.45	aTCTCTCGcgcttaacaatgta	x|||||||xxxxxxxxxxxxxx	aAGAGAGCtatccatcgacagt	Mctp	XP_006569491.2 multiple C2 and transmembrane domain-containing protein isoform X3 [Apis mellifera]	-	-	-	-	GO:0042729//DASH complex;GO:0072686//mitotic spindle	GO:0016773//phosphotransferase activity, alcohol group as acceptor	GO:0000278//mitotic cell cycle;GO:0006468//protein phosphorylation;GO:0019748//secondary metabolic process;GO:0044238//primary metabolic process
miR-281-x	XM_006569457.3	39	60	-10.15	cTCTCTCGTTAtcctcaccccc	x|||||||x||xxxxxxxxxxx	aAGAGAGCTATccatcgacagt	--	XP_006569520.2 uncharacterized protein LOC551089 [Apis mellifera]	-	-	-	-	-	-	-
miR-281-x	XM_006569586.3	1915	1935	-13.79	aTCTCTCG-TAACCATATGTta	x|||||||x||xxx|xx|||xx	aAGAGAGCTATCCATCGACAgt	Wnt4	XP_006569649.1 protein Wnt-1 isoform X3 [Apis mellifera]	Human Diseases;Human Diseases;Human Diseases;Environmental Information Processing;Human Diseases;Human Diseases;Organismal Systems;Environmental Information Processing;Organismal Systems;Environmental Information Processing;Human Diseases;Organismal Systems;Cellular Processes;Human Diseases;Human Diseases;Human Diseases	Cancers;Neurodegenerative diseases;Infectious diseases;Signal transduction;Endocrine and metabolic diseases;Cancers;Development;Signal transduction;Endocrine system;Signal transduction;Cancers;Endocrine system;Cellular community - eukaryotes;Cancers;Cancers;Cancers	ko05200//Pathways in cancer;ko05010//Alzheimer disease;ko05165//Human papillomavirus infection;ko04310//Wnt signaling pathway;ko04934//Cushing syndrome;ko05205//Proteoglycans in cancer;ko04360//Axon guidance;ko04390//Hippo signaling pathway;ko04919//Thyroid hormone signaling pathway;ko04150//mTOR signaling pathway;ko05225//Hepatocellular carcinoma;ko04916//Melanogenesis;ko04550//Signaling pathway…	K00408;K00408;K00408;K00408;K00408;K00408;K00408;K00408;K00408;K00408;K00408;K00408;K00408;K00408;K00408;K00408	GO:0005576//extracellular region	GO:0005102//receptor binding	GO:0007275//multicellular organism development;GO:0016055//Wnt signaling pathway
miR-281-x	XM_006569897.3	357	378	-11.77	tTCTCTCGCAAGtctaaccctt	x|||||||xx||xxxxxxxxxx	aAGAGAGCTATCcatcgacagt	ato	XP_006569960.2 uncharacterized protein LOC102656766 [Apis mellifera]	-	-	-	-	GO:0030867//rough endoplasmic reticulum membrane	GO:0046983//protein dimerization activity	GO:0023041//neuronal signal transduction
miR-281-x	XM_006569975.3	3169	3191	-15.41	tTCTCTCGCTTAGACAAGTGaac	x|||||||x|x||xx|xx||xxx	aAGAGAGCTA-TCCATCGACagt	Ten-a	XP_006570038.2 teneurin-a isoform X1 [Apis mellifera]	-	-	-	-	-	GO:0005515//protein binding	-
miR-281-x	XM_006569976.3	3169	3191	-15.41	tTCTCTCGCTTAGACAAGTGaac	x|||||||x|x||xx|xx||xxx	aAGAGAGCTA-TCCATCGACagt	Ten-a	XP_006570039.2 teneurin-a isoform X2 [Apis mellifera]	-	-	-	-	-	GO:0005515//protein binding	-
miR-281-x	XM_006569977.3	3169	3191	-15.41	tTCTCTCGCTTAGACAAGTGaac	x|||||||x|x||xx|xx||xxx	aAGAGAGCTA-TCCATCGACagt	Ten-a	XP_006570040.2 teneurin-a isoform X3 [Apis mellifera]	-	-	-	-	-	GO:0005515//protein binding	-
miR-281-x	XM_006569978.3	3169	3191	-15.41	tTCTCTCGCTTAGACAAGTGaac	x|||||||x|x||xx|xx||xxx	aAGAGAGCTA-TCCATCGACagt	Ten-a	XP_006570041.2 teneurin-a isoform X4 [Apis mellifera]	-	-	-	-	-	GO:0005515//protein binding	-
miR-281-x	XM_006569979.3	3169	3191	-15.41	tTCTCTCGCTTAGACAAGTGaac	x|||||||x|x||xx|xx||xxx	aAGAGAGCTA-TCCATCGACagt	Ten-a	XP_006570042.2 teneurin-a isoform X5 [Apis mellifera]	-	-	-	-	-	GO:0005515//protein binding	-
miR-281-x	XM_006569980.3	3169	3191	-15.41	tTCTCTCGCTTAGACAAGTGaac	x|||||||x|x||xx|xx||xxx	aAGAGAGCTA-TCCATCGACagt	Ten-a	XP_006570043.2 teneurin-a isoform X6 [Apis mellifera]	-	-	-	-	-	GO:0005515//protein binding	-
miR-281-x	XM_006569981.3	3169	3191	-15.41	tTCTCTCGCTTAGACAAGTGaac	x|||||||x|x||xx|xx||xxx	aAGAGAGCTA-TCCATCGACagt	Ten-a	XP_006570044.2 teneurin-a isoform X7 [Apis mellifera]	-	-	-	-	-	GO:0005515//protein binding	-
miR-281-x	XM_006570026.3	936	957	-12.72	aTCTCTCGtcaactgaaggcca	x|||||||xxxxxxxxxxxxxx	aAGAGAGCtatccatcgacagt	sog	XP_006570089.1 dorsal-ventral patterning protein Sog isoform X1 [Apis mellifera]	Environmental Information Processing	Signal transduction	ko04350//TGF-beta signaling pathway	K04657	-	GO:0005515//protein binding	-
miR-281-x	XM_006570028.3	936	957	-12.72	aTCTCTCGtcaactgaaggcca	x|||||||xxxxxxxxxxxxxx	aAGAGAGCtatccatcgacagt	sog	XP_006570091.1 dorsal-ventral patterning protein Sog isoform X3 [Apis mellifera]	Environmental Information Processing	Signal transduction	ko04350//TGF-beta signaling pathway	K04657	-	GO:0005515//protein binding	-
miR-281-x	XM_006570029.3	936	957	-12.72	aTCTCTCGtcaactgaaggcca	x|||||||xxxxxxxxxxxxxx	aAGAGAGCtatccatcgacagt	sog	XP_006570092.1 dorsal-ventral patterning protein Sog isoform X4 [Apis mellifera]	Environmental Information Processing	Signal transduction	ko04350//TGF-beta signaling pathway	K04657	-	GO:0005515//protein binding	-
miR-281-x	XM_006570030.3	936	957	-12.72	aTCTCTCGtcaactgaaggcca	x|||||||xxxxxxxxxxxxxx	aAGAGAGCtatccatcgacagt	sog	XP_006570092.1 dorsal-ventral patterning protein Sog isoform X4 [Apis mellifera]	Environmental Information Processing	Signal transduction	ko04350//TGF-beta signaling pathway	K04657	-	GO:0005515//protein binding	-
miR-281-x	XM_006570031.3	936	957	-12.72	aTCTCTCGtcaactgaaggcca	x|||||||xxxxxxxxxxxxxx	aAGAGAGCtatccatcgacagt	sog	XP_006570092.1 dorsal-ventral patterning protein Sog isoform X4 [Apis mellifera]	Environmental Information Processing	Signal transduction	ko04350//TGF-beta signaling pathway	K04657	-	GO:0005515//protein binding	-
miR-281-x	XM_006570032.3	289	308	-14.61	aTCTCTCGATA--TACTTTTat	x||||||||||xx||x:|x|xx	aAGAGAGCTATCCATCGACAgt	ARHGEF10	XP_006570095.2 rho guanine nucleotide exchange factor 10-like protein isoform X1 [Apis mellifera]	-	-	-	-	-	GO:0005085//guanyl-nucleotide exchange factor activity;GO:0008705//methionine synthase activity	GO:0009086//methionine biosynthetic process
miR-281-x	XM_006570033.3	289	308	-14.61	aTCTCTCGATA--TACTTTTat	x||||||||||xx||x:|x|xx	aAGAGAGCTATCCATCGACAgt	ARHGEF10	XP_006570095.2 rho guanine nucleotide exchange factor 10-like protein isoform X1 [Apis mellifera]	-	-	-	-	-	GO:0005085//guanyl-nucleotide exchange factor activity;GO:0008705//methionine synthase activity	GO:0009086//methionine biosynthetic process
miR-281-x	XM_006570034.3	289	308	-14.61	aTCTCTCGATA--TACTTTTat	x||||||||||xx||x:|x|xx	aAGAGAGCTATCCATCGACAgt	ARHGEF10	XP_006570097.2 rho guanine nucleotide exchange factor 10-like protein isoform X2 [Apis mellifera]	-	-	-	-	-	GO:0005085//guanyl-nucleotide exchange factor activity;GO:0008705//methionine synthase activity	GO:0009086//methionine biosynthetic process
miR-281-x	XM_006570035.3	289	308	-14.61	aTCTCTCGATA--TACTTTTat	x||||||||||xx||x:|x|xx	aAGAGAGCTATCCATCGACAgt	ARHGEF10	XP_006570098.2 rho guanine nucleotide exchange factor 10-like protein isoform X3 [Apis mellifera]	-	-	-	-	-	GO:0005085//guanyl-nucleotide exchange factor activity;GO:0008705//methionine synthase activity	GO:0009086//methionine biosynthetic process
miR-281-x	XM_006570036.3	289	308	-14.61	aTCTCTCGATA--TACTTTTat	x||||||||||xx||x:|x|xx	aAGAGAGCTATCCATCGACAgt	ARHGEF10	XP_006570099.2 rho guanine nucleotide exchange factor 10 isoform X4 [Apis mellifera]	-	-	-	-	-	GO:0005085//guanyl-nucleotide exchange factor activity;GO:0008705//methionine synthase activity	GO:0009086//methionine biosynthetic process
miR-281-x	XM_006570037.3	289	308	-14.61	aTCTCTCGATA--TACTTTTat	x||||||||||xx||x:|x|xx	aAGAGAGCTATCCATCGACAgt	ARHGEF10	XP_006570100.2 rho guanine nucleotide exchange factor 10 isoform X5 [Apis mellifera]	-	-	-	-	-	GO:0005085//guanyl-nucleotide exchange factor activity;GO:0008705//methionine synthase activity	GO:0009086//methionine biosynthetic process
miR-281-x	XM_006570038.3	289	308	-14.61	aTCTCTCGATA--TACTTTTat	x||||||||||xx||x:|x|xx	aAGAGAGCTATCCATCGACAgt	ARHGEF10	XP_006570097.2 rho guanine nucleotide exchange factor 10-like protein isoform X2 [Apis mellifera]	-	-	-	-	-	GO:0005085//guanyl-nucleotide exchange factor activity;GO:0008705//methionine synthase activity	GO:0009086//methionine biosynthetic process
miR-281-x	XM_006570090.3	1089	1110	-17.72	gTCTCTCGGTAAAATTTTGTta	x|||||||:||xxxxx:|||xx	aAGAGAGCTATCCATCGACAgt	--	XP_006570153.1 uncharacterized protein LOC551031 [Apis mellifera]	-	-	-	-	-	GO:0008083//growth factor activity	-
miR-281-x	XM_006570215.3	66	87	-10.97	cTCTCTCGcgctatttccatcc	x|||||||xxxxxxxxxxxxxx	aAGAGAGCtatccatcgacagt	br	XP_006570278.2 broad-complex core protein isoforms 1/2/3/4/5 isoform X5 [Apis mellifera]	-	-	-	-	-	GO:0003677//DNA binding;GO:0004017//adenylate kinase activity;GO:0005515//protein binding	-
miR-281-x	XM_006570555.3	781	803	-19.98	tTCTCTCGATTTGGTcacgaagc	x|||||||||xx|||xxxxxxxx	aAGAGAGCTAT-CCAtcgacagt	trc	XP_006570618.1 serine/threonine-protein kinase tricorner isoform X1 [Apis mellifera]	-	-	-	-	-	GO:0004672//protein kinase activity;GO:0004674//protein serine/threonine kinase activity;GO:0005524//ATP binding;GO:0016709//oxidoreductase activity, acting on paired donors, with incorporation or reduction of molecular oxygen, NAD(P)H as one donor, and incorporation of one atom of oxygen	GO:0006468//protein phosphorylation;GO:0006744//ubiquinone biosynthetic process
miR-281-x	XM_006570556.3	781	803	-19.98	tTCTCTCGATTTGGTcacgaagc	x|||||||||xx|||xxxxxxxx	aAGAGAGCTAT-CCAtcgacagt	trc	XP_006570619.1 serine/threonine-protein kinase tricorner isoform X3 [Apis mellifera]	-	-	-	-	-	GO:0004672//protein kinase activity;GO:0004674//protein serine/threonine kinase activity;GO:0005524//ATP binding;GO:0016709//oxidoreductase activity, acting on paired donors, with incorporation or reduction of molecular oxygen, NAD(P)H as one donor, and incorporation of one atom of oxygen	GO:0006468//protein phosphorylation;GO:0006744//ubiquinone biosynthetic process
miR-281-x	XM_006570557.3	781	803	-19.98	tTCTCTCGATTTGGTcacgaagc	x|||||||||xx|||xxxxxxxx	aAGAGAGCTAT-CCAtcgacagt	trc	XP_006570620.1 serine/threonine-protein kinase tricorner isoform X4 [Apis mellifera]	-	-	-	-	-	GO:0004672//protein kinase activity;GO:0004674//protein serine/threonine kinase activity;GO:0005524//ATP binding;GO:0016709//oxidoreductase activity, acting on paired donors, with incorporation or reduction of molecular oxygen, NAD(P)H as one donor, and incorporation of one atom of oxygen	GO:0006468//protein phosphorylation;GO:0006744//ubiquinone biosynthetic process
miR-281-x	XM_006570558.3	781	803	-19.98	tTCTCTCGATTTGGTcacgaagc	x|||||||||xx|||xxxxxxxx	aAGAGAGCTAT-CCAtcgacagt	trc	XP_006570621.1 serine/threonine-protein kinase tricorner isoform X5 [Apis mellifera]	-	-	-	-	-	GO:0004672//protein kinase activity;GO:0004674//protein serine/threonine kinase activity;GO:0005524//ATP binding;GO:0016709//oxidoreductase activity, acting on paired donors, with incorporation or reduction of molecular oxygen, NAD(P)H as one donor, and incorporation of one atom of oxygen	GO:0006468//protein phosphorylation;GO:0006744//ubiquinone biosynthetic process
miR-281-x	XM_006570559.3	781	803	-19.98	tTCTCTCGATTTGGTcacgaagc	x|||||||||xx|||xxxxxxxx	aAGAGAGCTAT-CCAtcgacagt	trc	XP_006570622.1 serine/threonine-protein kinase tricorner isoform X6 [Apis mellifera]	-	-	-	-	-	GO:0004672//protein kinase activity;GO:0004674//protein serine/threonine kinase activity;GO:0005524//ATP binding;GO:0016709//oxidoreductase activity, acting on paired donors, with incorporation or reduction of molecular oxygen, NAD(P)H as one donor, and incorporation of one atom of oxygen	GO:0006468//protein phosphorylation;GO:0006744//ubiquinone biosynthetic process
miR-281-x	XM_006570560.3	781	803	-19.98	tTCTCTCGATTTGGTcacgaagc	x|||||||||xx|||xxxxxxxx	aAGAGAGCTAT-CCAtcgacagt	trc	XP_006570620.1 serine/threonine-protein kinase tricorner isoform X4 [Apis mellifera]	-	-	-	-	-	GO:0004672//protein kinase activity;GO:0004674//protein serine/threonine kinase activity;GO:0005524//ATP binding;GO:0016709//oxidoreductase activity, acting on paired donors, with incorporation or reduction of molecular oxygen, NAD(P)H as one donor, and incorporation of one atom of oxygen	GO:0006468//protein phosphorylation;GO:0006744//ubiquinone biosynthetic process
miR-281-x	XM_006570922.3	38	59	-12.72	aTCTCTCGACGAGAAaattaaa	x||||||||x:x|x|xxxxxxx	aAGAGAGCTATCCATcgacagt	Pgant35A	XP_006570985.1 polypeptide N-acetylgalactosaminyltransferase 35A [Apis mellifera]	Metabolism;Metabolism;Metabolism	Global and overview maps;Glycan biosynthesis and metabolism;Glycan biosynthesis and metabolism	ko01100//Metabolic pathways;ko00514//Other types of O-glycan biosynthesis;ko00512//Mucin type O-glycan biosynthesis	K00710;K00710;K00710	-	GO:0016740//transferase activity;GO:0030246//carbohydrate binding	GO:0009058//biosynthetic process;GO:0009405//pathogenesis;GO:0009877//nodulation
miR-281-x	XM_006571075.3	2345	2367	-12.86	cTCTCTCGCTTTCTGCGCTaatt	x|||||||x|xxx|:x|||xxxx	aAGAGAGCTATCCAT-CGAcagt	Pip5k1a	XP_006571138.1 phosphatidylinositol 4-phosphate 5-kinase type-1 beta isoform X8 [Apis mellifera]	Metabolism;Cellular Processes;Cellular Processes;Environmental Information Processing;Environmental Information Processing;Human Diseases;Human Diseases;Metabolism;Organismal Systems	Global and overview maps;Transport and catabolism;Cell motility;Signal transduction;Signal transduction;Infectious disease: bacterial;Cancers;Carbohydrate metabolism;Immune system	ko01100//Metabolic pathways;ko04144//Endocytosis;ko04810//Regulation of actin cytoskeleton;ko04072//Phospholipase D signaling pathway;ko04070//Phosphatidylinositol signaling system;ko05135//Yersinia infection;ko05231//Choline metabolism in cancer;ko00562//Inositol phosphate metabolism;ko04666//Fc gamma R-mediated phagocytosis	K00889;K00889;K00889;K00889;K00889;K00889;K00889;K00889;K00889	-	GO:0016307//phosphatidylinositol phosphate kinase activity	GO:0046488//phosphatidylinositol metabolic process
miR-281-x	XM_006571165.3	1910	1931	-16.33	gTCTCTCGAGATGAAcagcagg	x||||||||x|x|x|xxxxxxx	aAGAGAGCTATCCATcgacagt	Elavl2	XP_006571228.1 ELAV-like protein 3 isoform X1 [Apis mellifera]	-	-	-	-	GO:0005634//nucleus;GO:0005737//cytoplasm	GO:0003676//nucleic acid binding;GO:0003723//RNA binding;GO:0004535//poly(A)-specific ribonuclease activity;GO:0046872//metal ion binding	GO:0006402//mRNA catabolic process;GO:0008380//RNA splicing
miR-281-x	XM_006571167.3	1910	1931	-16.33	gTCTCTCGAGATGAAcagcagg	x||||||||x|x|x|xxxxxxx	aAGAGAGCTATCCATcgacagt	Elavl2	XP_006571228.1 ELAV-like protein 3 isoform X1 [Apis mellifera]	-	-	-	-	GO:0005634//nucleus;GO:0005737//cytoplasm	GO:0003676//nucleic acid binding;GO:0003723//RNA binding;GO:0004535//poly(A)-specific ribonuclease activity;GO:0046872//metal ion binding	GO:0006402//mRNA catabolic process;GO:0008380//RNA splicing
miR-281-x	XM_006571168.3	1910	1931	-16.33	gTCTCTCGAGATGAAcagcagg	x||||||||x|x|x|xxxxxxx	aAGAGAGCTATCCATcgacagt	Elavl2	XP_006571228.1 ELAV-like protein 3 isoform X1 [Apis mellifera]	-	-	-	-	GO:0005634//nucleus;GO:0005737//cytoplasm	GO:0003676//nucleic acid binding;GO:0003723//RNA binding;GO:0004535//poly(A)-specific ribonuclease activity;GO:0046872//metal ion binding	GO:0006402//mRNA catabolic process;GO:0008380//RNA splicing
miR-281-x	XM_006571169.3	1910	1931	-16.33	gTCTCTCGAGATGAAcagcagg	x||||||||x|x|x|xxxxxxx	aAGAGAGCTATCCATcgacagt	Elavl2	XP_006571228.1 ELAV-like protein 3 isoform X1 [Apis mellifera]	-	-	-	-	GO:0005634//nucleus;GO:0005737//cytoplasm	GO:0003676//nucleic acid binding;GO:0003723//RNA binding;GO:0004535//poly(A)-specific ribonuclease activity;GO:0046872//metal ion binding	GO:0006402//mRNA catabolic process;GO:0008380//RNA splicing
miR-281-x	XM_006571170.3	1910	1931	-16.33	gTCTCTCGAGATGAAcagcagg	x||||||||x|x|x|xxxxxxx	aAGAGAGCTATCCATcgacagt	elavl4	XP_006571233.1 ELAV-like protein 1 isoform X2 [Apis mellifera]	-	-	-	-	GO:0005634//nucleus;GO:0005737//cytoplasm	GO:0003676//nucleic acid binding;GO:0003723//RNA binding;GO:0004535//poly(A)-specific ribonuclease activity;GO:0046872//metal ion binding	GO:0006402//mRNA catabolic process;GO:0008380//RNA splicing
miR-281-x	XM_006571171.3	1910	1931	-16.33	gTCTCTCGAGATGAAcagcagg	x||||||||x|x|x|xxxxxxx	aAGAGAGCTATCCATcgacagt	Elavl2	XP_006571234.1 ELAV-like protein 1 isoform X3 [Apis mellifera]	-	-	-	-	GO:0005634//nucleus;GO:0005737//cytoplasm	GO:0003676//nucleic acid binding;GO:0003723//RNA binding;GO:0004535//poly(A)-specific ribonuclease activity;GO:0046872//metal ion binding	GO:0006402//mRNA catabolic process;GO:0008380//RNA splicing
miR-281-x	XM_006571172.3	1910	1931	-16.33	gTCTCTCGAGATGAAcagcagg	x||||||||x|x|x|xxxxxxx	aAGAGAGCTATCCATcgacagt	elavl4	XP_006571235.1 ELAV-like protein 1 isoform X4 [Apis mellifera]	-	-	-	-	GO:0005634//nucleus;GO:0005737//cytoplasm	GO:0003676//nucleic acid binding;GO:0003723//RNA binding;GO:0004535//poly(A)-specific ribonuclease activity;GO:0046872//metal ion binding	GO:0006402//mRNA catabolic process;GO:0008380//RNA splicing
miR-281-x	XM_006571173.3	1910	1931	-16.33	gTCTCTCGAGATGAAcagcagg	x||||||||x|x|x|xxxxxxx	aAGAGAGCTATCCATcgacagt	Elavl2	XP_006571236.1 ELAV-like protein 3 isoform X5 [Apis mellifera]	-	-	-	-	GO:0005634//nucleus;GO:0005737//cytoplasm	GO:0003676//nucleic acid binding;GO:0003723//RNA binding;GO:0004535//poly(A)-specific ribonuclease activity;GO:0046872//metal ion binding	GO:0006402//mRNA catabolic process;GO:0008380//RNA splicing
miR-281-x	XM_006571174.3	1910	1931	-16.33	gTCTCTCGAGATGAAcagcagg	x||||||||x|x|x|xxxxxxx	aAGAGAGCTATCCATcgacagt	elavl4	XP_006571237.1 ELAV-like protein 1 isoform X6 [Apis mellifera]	-	-	-	-	GO:0005634//nucleus;GO:0005737//cytoplasm	GO:0003676//nucleic acid binding;GO:0003723//RNA binding;GO:0004535//poly(A)-specific ribonuclease activity;GO:0046872//metal ion binding	GO:0006402//mRNA catabolic process;GO:0008380//RNA splicing
miR-281-x	XM_006571175.3	1910	1931	-16.33	gTCTCTCGAGATGAAcagcagg	x||||||||x|x|x|xxxxxxx	aAGAGAGCTATCCATcgacagt	elavl4	XP_006571238.1 ELAV-like protein 1 isoform X7 [Apis mellifera]	-	-	-	-	GO:0005634//nucleus;GO:0005737//cytoplasm	GO:0003676//nucleic acid binding;GO:0003723//RNA binding;GO:0004535//poly(A)-specific ribonuclease activity;GO:0046872//metal ion binding	GO:0006402//mRNA catabolic process;GO:0008380//RNA splicing
miR-281-x	XM_006571176.3	1910	1931	-16.33	gTCTCTCGAGATGAAcagcagg	x||||||||x|x|x|xxxxxxx	aAGAGAGCTATCCATcgacagt	Elavl2	XP_006571239.1 ELAV-like protein 3 isoform X8 [Apis mellifera]	-	-	-	-	GO:0005634//nucleus;GO:0005737//cytoplasm	GO:0003676//nucleic acid binding;GO:0003723//RNA binding;GO:0004535//poly(A)-specific ribonuclease activity;GO:0046872//metal ion binding	GO:0006402//mRNA catabolic process;GO:0008380//RNA splicing
miR-281-x	XM_006571177.3	1910	1931	-16.33	gTCTCTCGAGATGAAcagcagg	x||||||||x|x|x|xxxxxxx	aAGAGAGCTATCCATcgacagt	ELAVL2	XP_006571240.1 ELAV-like protein 1 isoform X9 [Apis mellifera]	-	-	-	-	GO:0005634//nucleus;GO:0005737//cytoplasm	GO:0003676//nucleic acid binding;GO:0003723//RNA binding;GO:0004535//poly(A)-specific ribonuclease activity;GO:0046872//metal ion binding	GO:0006402//mRNA catabolic process;GO:0008380//RNA splicing
miR-281-x	XM_006571178.3	1910	1931	-16.33	gTCTCTCGAGATGAAcagcagg	x||||||||x|x|x|xxxxxxx	aAGAGAGCTATCCATcgacagt	elavl2	XP_006571241.1 ELAV-like protein 1 isoform X10 [Apis mellifera]	-	-	-	-	GO:0005634//nucleus;GO:0005737//cytoplasm	GO:0003676//nucleic acid binding;GO:0003723//RNA binding;GO:0004535//poly(A)-specific ribonuclease activity;GO:0046872//metal ion binding	GO:0006402//mRNA catabolic process;GO:0008380//RNA splicing
miR-281-x	XM_006571179.3	1910	1931	-16.33	gTCTCTCGAGATGAAcagcagg	x||||||||x|x|x|xxxxxxx	aAGAGAGCTATCCATcgacagt	elavl4	XP_006571242.1 ELAV-like protein 1 isoform X11 [Apis mellifera]	-	-	-	-	GO:0005634//nucleus;GO:0005737//cytoplasm	GO:0003676//nucleic acid binding;GO:0003723//RNA binding;GO:0004535//poly(A)-specific ribonuclease activity;GO:0046872//metal ion binding	GO:0006402//mRNA catabolic process;GO:0008380//RNA splicing
miR-281-x	XM_006571180.3	1910	1931	-16.33	gTCTCTCGAGATGAAcagcagg	x||||||||x|x|x|xxxxxxx	aAGAGAGCTATCCATcgacagt	Elavl2	XP_006571243.1 ELAV-like protein 2 isoform X12 [Apis mellifera]	-	-	-	-	GO:0005634//nucleus;GO:0005737//cytoplasm	GO:0003676//nucleic acid binding;GO:0003723//RNA binding;GO:0004535//poly(A)-specific ribonuclease activity;GO:0046872//metal ion binding	GO:0006402//mRNA catabolic process;GO:0008380//RNA splicing
miR-281-x	XM_006571181.3	1910	1931	-16.33	gTCTCTCGAGATGAAcagcagg	x||||||||x|x|x|xxxxxxx	aAGAGAGCTATCCATcgacagt	ELAVL2	XP_006571244.1 ELAV-like protein 2 isoform X13 [Apis mellifera]	-	-	-	-	GO:0005634//nucleus;GO:0005737//cytoplasm	GO:0003676//nucleic acid binding;GO:0003723//RNA binding;GO:0004535//poly(A)-specific ribonuclease activity;GO:0046872//metal ion binding	GO:0006402//mRNA catabolic process;GO:0008380//RNA splicing
miR-281-x	XM_006571182.3	1910	1931	-16.33	gTCTCTCGAGATGAAcagcagg	x||||||||x|x|x|xxxxxxx	aAGAGAGCTATCCATcgacagt	ELAVL2	XP_006571245.1 ELAV-like protein 2 isoform X14 [Apis mellifera]	-	-	-	-	GO:0005634//nucleus;GO:0005737//cytoplasm	GO:0003676//nucleic acid binding;GO:0003723//RNA binding;GO:0004535//poly(A)-specific ribonuclease activity;GO:0046872//metal ion binding	GO:0006402//mRNA catabolic process;GO:0008380//RNA splicing
miR-281-x	XM_006571183.3	1910	1931	-16.33	gTCTCTCGAGATGAAcagcagg	x||||||||x|x|x|xxxxxxx	aAGAGAGCTATCCATcgacagt	Elavl2	XP_006571246.1 ELAV-like protein 2 isoform X15 [Apis mellifera]	-	-	-	-	GO:0005634//nucleus;GO:0005737//cytoplasm	GO:0003676//nucleic acid binding;GO:0003723//RNA binding;GO:0004535//poly(A)-specific ribonuclease activity;GO:0046872//metal ion binding	GO:0006402//mRNA catabolic process;GO:0008380//RNA splicing
miR-281-x	XM_006571184.3	1910	1931	-16.33	gTCTCTCGAGATGAAcagcagg	x||||||||x|x|x|xxxxxxx	aAGAGAGCTATCCATcgacagt	Elavl2	XP_006571247.1 ELAV-like protein 2 isoform X16 [Apis mellifera]	-	-	-	-	GO:0005634//nucleus;GO:0005737//cytoplasm	GO:0003676//nucleic acid binding;GO:0003723//RNA binding;GO:0004535//poly(A)-specific ribonuclease activity;GO:0046872//metal ion binding	GO:0006402//mRNA catabolic process;GO:0008380//RNA splicing
miR-281-x	XM_006571185.3	1910	1931	-16.33	gTCTCTCGAGATGAAcagcagg	x||||||||x|x|x|xxxxxxx	aAGAGAGCTATCCATcgacagt	ELAVL2	XP_006571248.1 ELAV-like protein 2 isoform X17 [Apis mellifera]	-	-	-	-	GO:0005634//nucleus;GO:0005737//cytoplasm	GO:0003676//nucleic acid binding;GO:0003723//RNA binding;GO:0004535//poly(A)-specific ribonuclease activity;GO:0046872//metal ion binding	GO:0006402//mRNA catabolic process;GO:0008380//RNA splicing
miR-281-x	XM_006571262.3	7243	7264	-20.96	tTCTCTCGGTCGGgcccgctcc	x|||||||:|x||xxxxxxxxx	aAGAGAGCTATCCatcgacagt	Sema1a	XP_006571325.1 semaphorin-1A isoform X2 [Apis mellifera]	-	-	-	-	GO:0005886//plasma membrane	GO:0005515//protein binding	GO:0043065//positive regulation of apoptotic process
miR-281-x	XM_006571433.3	244	265	-11.68	tTCTCTCGCTctctctttctct	x|||||||x|xxxxxxxxxxxx	aAGAGAGCTAtccatcgacagt	GRIK2	XP_006571496.1 glutamate receptor ionotropic, kainate 2 isoform X2 [Apis mellifera]	-	-	-	-	GO:0016020//membrane;GO:0030288//outer membrane-bounded periplasmic space;GO:0031362//anchored component of external side of plasma membrane	GO:0004970//ionotropic glutamate receptor activity;GO:0015276//ligand-gated ion channel activity;GO:0033286//ectoine-transporting ATPase activity;GO:0033288//hydroxyectoine-transporting ATPase activity;GO:0033294//ectoine binding;GO:0033295//hydroxyectoine binding	GO:0033308//hydroxyectoine transport;GO:0051470//ectoine transport
miR-281-x	XM_006571919.3	1271	1292	-12.73	cTCTCTCGTTGCTTTGTTcgag	x|||||||x|:xx|x|:|xxxx	aAGAGAGCTATCCATCGAcagt	brat	XP_003251836.1 brain tumor protein [Apis mellifera]	-	-	-	-	-	GO:0005515//protein binding;GO:0008270//zinc ion binding;GO:0016755//transferase activity, transferring amino-acyl groups	GO:0019184//nonribosomal peptide biosynthetic process
miR-281-x	XM_006571921.3	1271	1292	-12.73	cTCTCTCGTTGCTTTGTTcgag	x|||||||x|:xx|x|:|xxxx	aAGAGAGCTATCCATCGAcagt	brat	XP_003251836.1 brain tumor protein [Apis mellifera]	-	-	-	-	-	GO:0005515//protein binding;GO:0008270//zinc ion binding;GO:0016755//transferase activity, transferring amino-acyl groups	GO:0019184//nonribosomal peptide biosynthetic process
miR-281-x	XM_006571923.3	1271	1292	-12.73	cTCTCTCGTTGCTTTGTTcgag	x|||||||x|:xx|x|:|xxxx	aAGAGAGCTATCCATCGAcagt	brat	XP_003251836.1 brain tumor protein [Apis mellifera]	-	-	-	-	-	GO:0005515//protein binding;GO:0008270//zinc ion binding;GO:0016755//transferase activity, transferring amino-acyl groups	GO:0019184//nonribosomal peptide biosynthetic process
miR-281-x	XM_016910719.2	574	594	-11.73	cTCTCTCGG-ACTTAACactta	x|||||||:x|xx||x|xxxxx	aAGAGAGCTATCCATCGacagt	--	XP_016766208.1 uncharacterized protein LOC107964039 [Apis mellifera]	-	-	-	-	-	-	-
miR-281-x	XM_016910765.2	5499	5522	-15.96	tTCTCTCGCTTGAGGAAtaacctg	x|||||||x|xx|||x|xxxxxxx	aAGAGAGCTA--TCCATcgacagt	TMEM272	XP_003251317.2 uncharacterized protein LOC100577635 isoform X1 [Apis mellifera]	-	-	-	-	-	-	-
miR-281-x	XM_016910874.2	244	265	-11.68	tTCTCTCGCTctctctttctct	x|||||||x|xxxxxxxxxxxx	aAGAGAGCTAtccatcgacagt	GRIK2	XP_016766363.1 glutamate receptor ionotropic, kainate 2 isoform X3 [Apis mellifera]	-	-	-	-	GO:0016020//membrane;GO:0030288//outer membrane-bounded periplasmic space;GO:0031362//anchored component of external side of plasma membrane	GO:0004970//ionotropic glutamate receptor activity;GO:0015276//ligand-gated ion channel activity;GO:0033286//ectoine-transporting ATPase activity;GO:0033288//hydroxyectoine-transporting ATPase activity;GO:0033294//ectoine binding;GO:0033295//hydroxyectoine binding	GO:0033308//hydroxyectoine transport;GO:0051470//ectoine transport
miR-281-x	XM_016911038.2	806	827	-16.6	gTCTCTCGCAAGGGGGggaagg	x|||||||xx|||x:|xxxxxx	aAGAGAGCTATCCATCgacagt	CAC	XP_016766527.1 voltage-dependent calcium channel type A subunit alpha-1 isoform X14 [Apis mellifera]	Human Diseases;Environmental Information Processing;Environmental Information Processing;Organismal Systems;Organismal Systems;Organismal Systems;Organismal Systems;Human Diseases;Organismal Systems;Organismal Systems;Human Diseases;Human Diseases	Neurodegenerative diseases;Signal transduction;Signal transduction;Nervous system;Nervous system;Nervous system;Nervous system;Substance dependence;Nervous system;Nervous system;Endocrine and metabolic diseases;Substance dependence	ko05016//Huntington disease;ko04010//MAPK signaling pathway;ko04020//Calcium signaling pathway;ko04728//Dopaminergic synapse;ko04721//Synaptic vesicle cycle;ko04725//Cholinergic synapse;ko04723//Retrograde endocannabinoid signaling;ko05032//Morphine addiction;ko04726//Serotonergic synapse;ko04727//GABAergic synapse;ko04930//Type II diabetes mellitus;ko05033//Nicotine addiction	K04849;K04849;K04849;K04849;K04849;K04849;K04849;K04849;K04849;K04849;K04849;K04849	GO:0016020//membrane	GO:0005216//ion channel activity;GO:0005509//calcium ion binding	GO:0006811//ion transport;GO:0055085//transmembrane transport
miR-281-x	XM_016911043.2	806	827	-16.6	gTCTCTCGCAAGGGGGggaagg	x|||||||xx|||x:|xxxxxx	aAGAGAGCTATCCATCgacagt	CAC	XP_016766527.1 voltage-dependent calcium channel type A subunit alpha-1 isoform X14 [Apis mellifera]	Human Diseases;Environmental Information Processing;Environmental Information Processing;Organismal Systems;Organismal Systems;Organismal Systems;Organismal Systems;Human Diseases;Organismal Systems;Organismal Systems;Human Diseases;Human Diseases	Neurodegenerative diseases;Signal transduction;Signal transduction;Nervous system;Nervous system;Nervous system;Nervous system;Substance dependence;Nervous system;Nervous system;Endocrine and metabolic diseases;Substance dependence	ko05016//Huntington disease;ko04010//MAPK signaling pathway;ko04020//Calcium signaling pathway;ko04728//Dopaminergic synapse;ko04721//Synaptic vesicle cycle;ko04725//Cholinergic synapse;ko04723//Retrograde endocannabinoid signaling;ko05032//Morphine addiction;ko04726//Serotonergic synapse;ko04727//GABAergic synapse;ko04930//Type II diabetes mellitus;ko05033//Nicotine addiction	K04849;K04849;K04849;K04849;K04849;K04849;K04849;K04849;K04849;K04849;K04849;K04849	GO:0016020//membrane	GO:0005216//ion channel activity;GO:0005509//calcium ion binding	GO:0006811//ion transport;GO:0055085//transmembrane transport
miR-281-x	XM_016911048.2	806	827	-16.6	gTCTCTCGCAAGGGGGggaagg	x|||||||xx|||x:|xxxxxx	aAGAGAGCTATCCATCgacagt	CAC	XP_016766527.1 voltage-dependent calcium channel type A subunit alpha-1 isoform X14 [Apis mellifera]	Human Diseases;Environmental Information Processing;Environmental Information Processing;Organismal Systems;Organismal Systems;Organismal Systems;Organismal Systems;Human Diseases;Organismal Systems;Organismal Systems;Human Diseases;Human Diseases	Neurodegenerative diseases;Signal transduction;Signal transduction;Nervous system;Nervous system;Nervous system;Nervous system;Substance dependence;Nervous system;Nervous system;Endocrine and metabolic diseases;Substance dependence	ko05016//Huntington disease;ko04010//MAPK signaling pathway;ko04020//Calcium signaling pathway;ko04728//Dopaminergic synapse;ko04721//Synaptic vesicle cycle;ko04725//Cholinergic synapse;ko04723//Retrograde endocannabinoid signaling;ko05032//Morphine addiction;ko04726//Serotonergic synapse;ko04727//GABAergic synapse;ko04930//Type II diabetes mellitus;ko05033//Nicotine addiction	K04849;K04849;K04849;K04849;K04849;K04849;K04849;K04849;K04849;K04849;K04849;K04849	GO:0016020//membrane	GO:0005216//ion channel activity;GO:0005509//calcium ion binding	GO:0006811//ion transport;GO:0055085//transmembrane transport
miR-281-x	XM_016911049.2	806	827	-16.6	gTCTCTCGCAAGGGGGggaagg	x|||||||xx|||x:|xxxxxx	aAGAGAGCTATCCATCgacagt	CAC	XP_016766538.1 voltage-dependent calcium channel type A subunit alpha-1 isoform X28 [Apis mellifera]	Human Diseases;Environmental Information Processing;Environmental Information Processing;Organismal Systems;Organismal Systems;Organismal Systems;Organismal Systems;Human Diseases;Organismal Systems;Organismal Systems;Human Diseases;Human Diseases	Neurodegenerative diseases;Signal transduction;Signal transduction;Nervous system;Nervous system;Nervous system;Nervous system;Substance dependence;Nervous system;Nervous system;Endocrine and metabolic diseases;Substance dependence	ko05016//Huntington disease;ko04010//MAPK signaling pathway;ko04020//Calcium signaling pathway;ko04728//Dopaminergic synapse;ko04721//Synaptic vesicle cycle;ko04725//Cholinergic synapse;ko04723//Retrograde endocannabinoid signaling;ko05032//Morphine addiction;ko04726//Serotonergic synapse;ko04727//GABAergic synapse;ko04930//Type II diabetes mellitus;ko05033//Nicotine addiction	K04849;K04849;K04849;K04849;K04849;K04849;K04849;K04849;K04849;K04849;K04849;K04849	GO:0016020//membrane	GO:0005216//ion channel activity;GO:0005509//calcium ion binding	GO:0006811//ion transport;GO:0055085//transmembrane transport
miR-281-x	XM_016911095.2	546	567	-15.44	cTCTCTCGAccactacgcgttg	x||||||||xxxxxxxxxxxxx	aAGAGAGCTatccatcgacagt	--	XP_016766584.2 uncharacterized protein LOC100577047 isoform X1 [Apis mellifera]	-	-	-	-	-	-	-
miR-281-x	XM_016911096.2	546	567	-15.44	cTCTCTCGAccactacgcgttg	x||||||||xxxxxxxxxxxxx	aAGAGAGCTatccatcgacagt	--	XP_016766585.2 uncharacterized protein LOC100577047 isoform X2 [Apis mellifera]	-	-	-	-	-	-	-
miR-281-x	XM_016911099.2	546	567	-15.44	cTCTCTCGAccactacgcgttg	x||||||||xxxxxxxxxxxxx	aAGAGAGCTatccatcgacagt	--	XP_016766584.2 uncharacterized protein LOC100577047 isoform X1 [Apis mellifera]	-	-	-	-	-	-	-
miR-281-x	XM_016911310.2	1954	1976	-10.77	aTCTCTCGCATAcatctatacat	x|||||||x|||xxxxxxxxxxx	aAGAGAGC-TATccatcgacagt	Hs3st5	XP_006569299.1 heparan sulfate glucosamine 3-O-sulfotransferase 1 isoform X2 [Apis mellifera]	Metabolism	Glycan biosynthesis and metabolism	ko00534//Glycosaminoglycan biosynthesis - heparan sulfate / heparin	K08104	GO:0000124//SAGA complex;GO:0016021//integral component of membrane	GO:0003712//transcription cofactor activity;GO:0008146//sulfotransferase activity	-
miR-281-x	XM_016911312.2	1954	1976	-10.77	aTCTCTCGCATAcatctatacat	x|||||||x|||xxxxxxxxxxx	aAGAGAGC-TATccatcgacagt	Hs3st5	XP_006569299.1 heparan sulfate glucosamine 3-O-sulfotransferase 1 isoform X2 [Apis mellifera]	Metabolism	Glycan biosynthesis and metabolism	ko00534//Glycosaminoglycan biosynthesis - heparan sulfate / heparin	K08104	GO:0000124//SAGA complex;GO:0016021//integral component of membrane	GO:0003712//transcription cofactor activity;GO:0008146//sulfotransferase activity	-
miR-281-x	XM_016911313.2	1954	1976	-10.77	aTCTCTCGCATAcatctatacat	x|||||||x|||xxxxxxxxxxx	aAGAGAGC-TATccatcgacagt	Hs3st5	XP_006569299.1 heparan sulfate glucosamine 3-O-sulfotransferase 1 isoform X2 [Apis mellifera]	Metabolism	Glycan biosynthesis and metabolism	ko00534//Glycosaminoglycan biosynthesis - heparan sulfate / heparin	K08104	GO:0000124//SAGA complex;GO:0016021//integral component of membrane	GO:0003712//transcription cofactor activity;GO:0008146//sulfotransferase activity	-
miR-281-x	XM_016911396.2	1036	1057	-12.42	cTCTCTCGCTttgctccttctc	x|||||||x|xxxxxxxxxxxx	aAGAGAGCTAtccatcgacagt	Sur	XP_016766885.2 ATP-binding cassette sub-family C member Sur isoform X1 [Apis mellifera]	Environmental Information Processing	Membrane transport	ko02010//ABC transporters	K05033	GO:0005575//cellular_component;GO:0005887//integral component of plasma membrane;GO:0009380//excinuclease repair complex;GO:0009898//cytoplasmic side of plasma membrane;GO:0016021//integral component of membrane;GO:0043190//ATP-binding cassette (ABC) transporter complex;GO:0055051//ATP-binding cassette (ABC) transporter complex, integrated substrate binding;GO:0055052//ATP-binding cassette (ABC) …	GO:0000166//nucleotide binding;GO:0003677//DNA binding;GO:0003924//GTPase activity;GO:0004527//exonuclease activity;GO:0005260//channel-conductance-controlling ATPase activity;GO:0005319//lipid transporter activity;GO:0005524//ATP binding;GO:0005525//GTP binding;GO:0008565//protein transporter activity;GO:0009381//excinuclease ABC activity;GO:0015220//choline transmembrane transporter activity;GO…	GO:0000910//cytokinesis;GO:0006260//DNA replication;GO:0006289//nucleotide-excision repair;GO:0006310//DNA recombination;GO:0006810//transport;GO:0006817//phosphate ion transport;GO:0006824//cobalt ion transport;GO:0006855//drug transmembrane transport;GO:0006869//lipid transport;GO:0007601//visual perception;GO:0008150//biological_process;GO:0008272//sulfate transport;GO:0015675//nickel cation t…
miR-281-x	XM_016911398.2	1036	1057	-12.42	cTCTCTCGCTttgctccttctc	x|||||||x|xxxxxxxxxxxx	aAGAGAGCTAtccatcgacagt	Sur	XP_016766887.2 ATP-binding cassette sub-family C member Sur isoform X2 [Apis mellifera]	Environmental Information Processing	Membrane transport	ko02010//ABC transporters	K05033	GO:0005575//cellular_component;GO:0005887//integral component of plasma membrane;GO:0009380//excinuclease repair complex;GO:0009898//cytoplasmic side of plasma membrane;GO:0016021//integral component of membrane;GO:0043190//ATP-binding cassette (ABC) transporter complex;GO:0055051//ATP-binding cassette (ABC) transporter complex, integrated substrate binding;GO:0055052//ATP-binding cassette (ABC) …	GO:0000166//nucleotide binding;GO:0003677//DNA binding;GO:0003924//GTPase activity;GO:0004386//helicase activity;GO:0004527//exonuclease activity;GO:0005260//channel-conductance-controlling ATPase activity;GO:0005319//lipid transporter activity;GO:0005524//ATP binding;GO:0005525//GTP binding;GO:0008565//protein transporter activity;GO:0009381//excinuclease ABC activity;GO:0015220//choline transme…	GO:0000910//cytokinesis;GO:0006260//DNA replication;GO:0006289//nucleotide-excision repair;GO:0006310//DNA recombination;GO:0006810//transport;GO:0006817//phosphate ion transport;GO:0006824//cobalt ion transport;GO:0006855//drug transmembrane transport;GO:0006869//lipid transport;GO:0007601//visual perception;GO:0008150//biological_process;GO:0008272//sulfate transport;GO:0015675//nickel cation t…
miR-281-x	XM_016911399.2	1036	1057	-12.42	cTCTCTCGCTttgctccttctc	x|||||||x|xxxxxxxxxxxx	aAGAGAGCTAtccatcgacagt	Sur	XP_016766888.2 ATP-binding cassette sub-family C member Sur isoform X3 [Apis mellifera]	Environmental Information Processing	Membrane transport	ko02010//ABC transporters	K05033	GO:0005575//cellular_component;GO:0005887//integral component of plasma membrane;GO:0009380//excinuclease repair complex;GO:0009898//cytoplasmic side of plasma membrane;GO:0016021//integral component of membrane;GO:0043190//ATP-binding cassette (ABC) transporter complex;GO:0055051//ATP-binding cassette (ABC) transporter complex, integrated substrate binding;GO:0055052//ATP-binding cassette (ABC) …	GO:0000166//nucleotide binding;GO:0003677//DNA binding;GO:0003924//GTPase activity;GO:0004527//exonuclease activity;GO:0005260//channel-conductance-controlling ATPase activity;GO:0005319//lipid transporter activity;GO:0005524//ATP binding;GO:0005525//GTP binding;GO:0008565//protein transporter activity;GO:0009381//excinuclease ABC activity;GO:0015220//choline transmembrane transporter activity;GO…	GO:0000910//cytokinesis;GO:0006260//DNA replication;GO:0006289//nucleotide-excision repair;GO:0006310//DNA recombination;GO:0006810//transport;GO:0006817//phosphate ion transport;GO:0006824//cobalt ion transport;GO:0006855//drug transmembrane transport;GO:0006869//lipid transport;GO:0007601//visual perception;GO:0008150//biological_process;GO:0008272//sulfate transport;GO:0015675//nickel cation t…
miR-281-x	XM_016911400.2	1036	1057	-12.42	cTCTCTCGCTttgctccttctc	x|||||||x|xxxxxxxxxxxx	aAGAGAGCTAtccatcgacagt	Sur	XP_016766889.2 ATP-binding cassette sub-family C member Sur isoform X4 [Apis mellifera]	Environmental Information Processing	Membrane transport	ko02010//ABC transporters	K05033	GO:0005575//cellular_component;GO:0005887//integral component of plasma membrane;GO:0009380//excinuclease repair complex;GO:0009898//cytoplasmic side of plasma membrane;GO:0016021//integral component of membrane;GO:0043190//ATP-binding cassette (ABC) transporter complex;GO:0055051//ATP-binding cassette (ABC) transporter complex, integrated substrate binding;GO:0055052//ATP-binding cassette (ABC) …	GO:0000166//nucleotide binding;GO:0003677//DNA binding;GO:0003924//GTPase activity;GO:0004386//helicase activity;GO:0004527//exonuclease activity;GO:0005260//channel-conductance-controlling ATPase activity;GO:0005319//lipid transporter activity;GO:0005524//ATP binding;GO:0005525//GTP binding;GO:0008565//protein transporter activity;GO:0009381//excinuclease ABC activity;GO:0015220//choline transme…	GO:0000910//cytokinesis;GO:0006260//DNA replication;GO:0006289//nucleotide-excision repair;GO:0006310//DNA recombination;GO:0006810//transport;GO:0006817//phosphate ion transport;GO:0006824//cobalt ion transport;GO:0006855//drug transmembrane transport;GO:0006869//lipid transport;GO:0007601//visual perception;GO:0008150//biological_process;GO:0008272//sulfate transport;GO:0015675//nickel cation t…
miR-281-x	XM_016911501.2	4888	4909	-17.26	tTCTCTCGAGAGAGAGagagaa	x||||||||x||xx||xxxxxx	aAGAGAGCTATCCATCgacagt	Tob1	XP_006564053.1 protein Tob1 [Apis mellifera]	Genetic Information Processing	Folding, sorting and degradation	ko03018//RNA degradation	K14443	GO:0005672//transcription factor TFIIA complex;GO:0016021//integral component of membrane	GO:0004190//aspartic-type endopeptidase activity	GO:0006367//transcription initiation from RNA polymerase II promoter;GO:0006811//ion transport;GO:0016485//protein processing
miR-281-x	XM_016911518.2	902	922	-18.43	aTCTCTCG-TACGGT-GCTcata	x|||||||x||x|||x|||xxxx	aAGAGAGCTAT-CCATCGAcagt	--	XP_016767006.1 uncharacterized protein LOC100577327 [Apis mellifera]	-	-	-	-	-	-	-
miR-281-x	XM_016911642.2	129	150	-12.18	tTCTCTCGTTTATTAACAGTaa	x|||||||x|xxx||x|x||xx	aAGAGAGCTATCCATCGACAgt	DAT	XP_016767131.1 dopamine transporter isoform X1 [Apis mellifera]	Organismal Systems;Organismal Systems;Human Diseases;Human Diseases;Human Diseases;Human Diseases	Nervous system;Nervous system;Substance dependence;Substance dependence;Neurodegenerative diseases;Substance dependence	ko04728//Dopaminergic synapse;ko04721//Synaptic vesicle cycle;ko05031//Amphetamine addiction;ko05034//Alcoholism;ko05012//Parkinson disease;ko05030//Cocaine addiction	K05036;K05036;K05036;K05036;K05036;K05036	GO:0016021//integral component of membrane	-	-
miR-281-x	XM_016911644.2	797	818	-20.8	tTCTCTCGTTAT-TATGCTGTgc	x|||||||x||xx||x|||||xx	aAGAGAGCTATCCAT-CGACAgt	lolal	XP_001120198.1 longitudinals lacking protein-like [Apis mellifera]	-	-	-	-	-	GO:0003674//molecular_function;GO:0005515//protein binding;GO:0016869//intramolecular transferase activity, transferring amino groups;GO:0030170//pyridoxal phosphate binding;GO:0050066//lysine 2,3-aminomutase activity;GO:0051539//4 iron, 4 sulfur cluster binding;GO:0070283//radical SAM enzyme activity	GO:0006525//arginine metabolic process;GO:0006536//glutamate metabolic process;GO:0030436//asexual sporulation;GO:0046440//L-lysine metabolic process
miR-281-x	XM_016911667.2	129	150	-12.18	tTCTCTCGTTTATTAACAGTaa	x|||||||x|xxx||x|x||xx	aAGAGAGCTATCCATCGACAgt	DAT	XP_016767131.1 dopamine transporter isoform X1 [Apis mellifera]	Organismal Systems;Organismal Systems;Human Diseases;Human Diseases;Human Diseases;Human Diseases	Nervous system;Nervous system;Substance dependence;Substance dependence;Neurodegenerative diseases;Substance dependence	ko04728//Dopaminergic synapse;ko04721//Synaptic vesicle cycle;ko05031//Amphetamine addiction;ko05034//Alcoholism;ko05012//Parkinson disease;ko05030//Cocaine addiction	K05036;K05036;K05036;K05036;K05036;K05036	GO:0016021//integral component of membrane	-	-
miR-281-x	XM_016911983.2	473	498	-19.3	cTCTCTCGATATAAGATATGTTGcga	x||||||||||xxx|x||x|:||xxx	aAGAGAGCTAT---CCAT-CGACagt	Slc17a5	XP_003694584.1 sialin-like isoform X2 [Apis florea]	-	-	-	-	-	GO:0022857//transmembrane transporter activity	GO:0055085//transmembrane transport
miR-281-x	XM_016912172.2	1704	1726	-14.76	tTCTCTCGCTTCGCTCCGTGTcc	x|||||||x|xx|xxx|x|||xx	aAGAGAGCTATCCATCG-ACAgt	OXR1	XP_016767661.2 TLD domain-containing protein 2 isoform X1 [Apis mellifera]	-	-	-	-	GO:0005576//extracellular region	GO:0005179//hormone activity	GO:0007275//multicellular organism development
miR-281-x	XM_016912173.2	1704	1726	-14.76	tTCTCTCGCTTCGCTCCGTGTcc	x|||||||x|xx|xxx|x|||xx	aAGAGAGCTATCCATCG-ACAgt	OXR1	XP_016767662.1 TLD domain-containing protein 2 isoform X2 [Apis mellifera]	-	-	-	-	-	-	-
miR-281-x	XM_016912174.2	1704	1726	-14.76	tTCTCTCGCTTCGCTCCGTGTcc	x|||||||x|xx|xxx|x|||xx	aAGAGAGCTATCCATCG-ACAgt	OXR1	XP_016767661.2 TLD domain-containing protein 2 isoform X1 [Apis mellifera]	-	-	-	-	-	-	-
miR-281-x	XM_016912321.2	936	957	-12.72	aTCTCTCGtcaactgaaggcca	x|||||||xxxxxxxxxxxxxx	aAGAGAGCtatccatcgacagt	sog	XP_006570092.1 dorsal-ventral patterning protein Sog isoform X4 [Apis mellifera]	Environmental Information Processing	Signal transduction	ko04350//TGF-beta signaling pathway	K04657	-	GO:0005515//protein binding	-
miR-281-x	XM_016912556.2	781	803	-19.98	tTCTCTCGATTTGGTcacgaagc	x|||||||||xx|||xxxxxxxx	aAGAGAGCTAT-CCAtcgacagt	trc	XP_016768045.1 serine/threonine-protein kinase tricorner isoform X8 [Apis mellifera]	-	-	-	-	-	GO:0004672//protein kinase activity;GO:0004674//protein serine/threonine kinase activity;GO:0005524//ATP binding;GO:0016709//oxidoreductase activity, acting on paired donors, with incorporation or reduction of molecular oxygen, NAD(P)H as one donor, and incorporation of one atom of oxygen	GO:0006468//protein phosphorylation;GO:0006744//ubiquinone biosynthetic process
miR-281-x	XM_016912569.2	2368	2387	-17.34	tTCTCTCG-TAGC-AGCcaagt	x|||||||x|||xx|||xxxxx	aAGAGAGCTATCCATCGacagt	mam	XP_016768058.2 neurogenic protein mastermind isoform X2 [Apis mellifera]	Human Diseases;Environmental Information Processing;Organismal Systems	Infectious diseases;Signal transduction;Immune system	ko05165//Human papillomavirus infection;ko04330//Notch signaling pathway;ko04658//Th1 and Th2 cell differentiation	K06061;K06061;K06061	GO:0016607//nuclear speck	GO:0003713//transcription coactivator activity	GO:0007219//Notch signaling pathway;GO:0045944//positive regulation of transcription from RNA polymerase II promoter
miR-281-x	XM_016912570.2	2368	2387	-17.34	tTCTCTCG-TAGC-AGCcaagt	x|||||||x|||xx|||xxxxx	aAGAGAGCTATCCATCGacagt	mam	XP_016768059.2 neurogenic protein mastermind isoform X3 [Apis mellifera]	Human Diseases;Environmental Information Processing;Organismal Systems	Infectious diseases;Signal transduction;Immune system	ko05165//Human papillomavirus infection;ko04330//Notch signaling pathway;ko04658//Th1 and Th2 cell differentiation	K06061;K06061;K06061	-	-	-
miR-281-x	XM_016912571.2	2368	2387	-17.34	tTCTCTCG-TAGC-AGCcaagt	x|||||||x|||xx|||xxxxx	aAGAGAGCTATCCATCGacagt	mam	XP_016768060.2 neurogenic protein mastermind isoform X4 [Apis mellifera]	Human Diseases;Environmental Information Processing;Organismal Systems	Infectious diseases;Signal transduction;Immune system	ko05165//Human papillomavirus infection;ko04330//Notch signaling pathway;ko04658//Th1 and Th2 cell differentiation	K06061;K06061;K06061	-	-	-
miR-281-x	XM_016912821.2	1909	1930	-14.22	cTCTCTCGcctttcttaaggct	x|||||||xxxxxxxxxxxxxx	aAGAGAGCtatccatcgacagt	Gpr52	XP_016768310.1 G-protein coupled receptor 52 [Apis mellifera]	-	-	-	-	GO:0016020//membrane;GO:0016021//integral component of membrane	GO:0004930//G-protein coupled receptor activity	GO:0007186//G-protein coupled receptor signaling pathway;GO:0043269//regulation of ion transport
miR-281-x	XM_016912822.2	1909	1930	-14.22	cTCTCTCGcctttcttaaggct	x|||||||xxxxxxxxxxxxxx	aAGAGAGCtatccatcgacagt	Gpr52	XP_016768310.1 G-protein coupled receptor 52 [Apis mellifera]	-	-	-	-	GO:0016020//membrane;GO:0016021//integral component of membrane	GO:0004930//G-protein coupled receptor activity	GO:0007186//G-protein coupled receptor signaling pathway;GO:0043269//regulation of ion transport
miR-281-x	XM_016912823.2	1909	1930	-14.22	cTCTCTCGcctttcttaaggct	x|||||||xxxxxxxxxxxxxx	aAGAGAGCtatccatcgacagt	Gpr52	XP_016768310.1 G-protein coupled receptor 52 [Apis mellifera]	-	-	-	-	GO:0016020//membrane;GO:0016021//integral component of membrane	GO:0004930//G-protein coupled receptor activity	GO:0007186//G-protein coupled receptor signaling pathway;GO:0043269//regulation of ion transport
miR-281-x	XM_016912824.2	1909	1930	-14.22	cTCTCTCGcctttcttaaggct	x|||||||xxxxxxxxxxxxxx	aAGAGAGCtatccatcgacagt	Gpr52	XP_016768310.1 G-protein coupled receptor 52 [Apis mellifera]	-	-	-	-	GO:0016020//membrane;GO:0016021//integral component of membrane	GO:0004930//G-protein coupled receptor activity	GO:0007186//G-protein coupled receptor signaling pathway;GO:0043269//regulation of ion transport
miR-281-x	XM_016912999.2	1155	1176	-17.72	cTCTCTCGGCGCTTAGCaccgg	x|||||||:x:xx||||xxxxx	aAGAGAGCTATCCATCGacagt	orb2	XP_006560903.1 cytoplasmic polyadenylation element-binding protein 2 [Apis mellifera]	Cellular Processes;Organismal Systems;Organismal Systems	Cell growth and death;Development;Endocrine system	ko04114//Oocyte meiosis;ko04320//Dorso-ventral axis formation;ko04914//Progesterone-mediated oocyte maturation	K02602;K02602;K02602	GO:0005634//nucleus;GO:0071203//WASH complex	GO:0003676//nucleic acid binding	GO:0006397//mRNA processing;GO:0008380//RNA splicing
miR-281-x	XM_016913010.2	11407	11428	-14.36	gTCTCTCGCTctccagagcgcg	x|||||||x|xxxxxxxxxxxx	aAGAGAGCTAtccatcgacagt	cpo	XP_006611191.1 protein couch potato-like isoform X8 [Apis dorsata]	-	-	-	-	-	GO:0003676//nucleic acid binding	GO:0008380//RNA splicing
miR-281-x	XM_016913011.2	11407	11428	-14.36	gTCTCTCGCTctccagagcgcg	x|||||||x|xxxxxxxxxxxx	aAGAGAGCTAtccatcgacagt	cpo	XP_006611194.1 U1 small nuclear ribonucleoprotein A-like isoform X11 [Apis dorsata]	-	-	-	-	-	GO:0003676//nucleic acid binding	GO:0008380//RNA splicing
miR-281-x	XM_016913021.2	1089	1110	-17.72	gTCTCTCGGTAAAATTTTGTta	x|||||||:||xxxxx:|||xx	aAGAGAGCTATCCATCGACAgt	--	XP_006570153.1 uncharacterized protein LOC551031 [Apis mellifera]	-	-	-	-	-	GO:0008083//growth factor activity	-
miR-281-x	XM_016913171.2	4152	4173	-11.45	aTCTCTCGcgcttaacaatgta	x|||||||xxxxxxxxxxxxxx	aAGAGAGCtatccatcgacagt	Mctp	XP_016768660.2 multiple C2 and transmembrane domain-containing protein isoform X1 [Apis mellifera]	-	-	-	-	GO:0042729//DASH complex;GO:0072686//mitotic spindle	GO:0016773//phosphotransferase activity, alcohol group as acceptor	GO:0000278//mitotic cell cycle;GO:0006468//protein phosphorylation;GO:0019748//secondary metabolic process;GO:0044238//primary metabolic process
miR-281-x	XM_016913172.2	4152	4173	-11.45	aTCTCTCGcgcttaacaatgta	x|||||||xxxxxxxxxxxxxx	aAGAGAGCtatccatcgacagt	Mctp	XP_016768661.2 multiple C2 and transmembrane domain-containing protein isoform X4 [Apis mellifera]	-	-	-	-	-	-	-
miR-281-x	XM_016913173.2	4152	4173	-11.45	aTCTCTCGcgcttaacaatgta	x|||||||xxxxxxxxxxxxxx	aAGAGAGCtatccatcgacagt	Mctp	XP_016768661.2 multiple C2 and transmembrane domain-containing protein isoform X4 [Apis mellifera]	-	-	-	-	-	-	-
miR-281-x	XM_016913174.2	4152	4173	-11.45	aTCTCTCGcgcttaacaatgta	x|||||||xxxxxxxxxxxxxx	aAGAGAGCtatccatcgacagt	Mctp	XP_016768663.2 multiple C2 and transmembrane domain-containing protein isoform X5 [Apis mellifera]	-	-	-	-	-	-	-
miR-281-x	XM_016913177.2	4152	4173	-11.45	aTCTCTCGcgcttaacaatgta	x|||||||xxxxxxxxxxxxxx	aAGAGAGCtatccatcgacagt	Mctp	XP_016768661.2 multiple C2 and transmembrane domain-containing protein isoform X4 [Apis mellifera]	-	-	-	-	-	-	-
miR-281-x	XM_016913438.2	574	595	-18.59	tTCTCTCGAgcttattgcttct	x||||||||xxxxxxxxxxxxx	aAGAGAGCTatccatcgacagt	NOL4	XP_003249519.2 uncharacterized protein LOC100578337 [Apis mellifera]	-	-	-	-	-	-	-
miR-281-x	XM_016913439.2	574	595	-18.59	tTCTCTCGAgcttattgcttct	x||||||||xxxxxxxxxxxxx	aAGAGAGCTatccatcgacagt	NOL4	XP_003249519.2 uncharacterized protein LOC100578337 [Apis mellifera]	-	-	-	-	-	-	-
miR-281-x	XM_016913440.2	574	595	-18.59	tTCTCTCGAgcttattgcttct	x||||||||xxxxxxxxxxxxx	aAGAGAGCTatccatcgacagt	NOL4	XP_003249519.2 uncharacterized protein LOC100578337 [Apis mellifera]	-	-	-	-	-	-	-
miR-281-x	XM_016913467.2	7	28	-13.32	gTCTCTCGAcgaaaaaagtgta	x||||||||xxxxxxxxxxxxx	aAGAGAGCTatccatcgacagt	Tnk2	XP_016768956.2 uncharacterized protein LOC413052 [Apis mellifera]	-	-	-	-	-	GO:0004672//protein kinase activity;GO:0005515//protein binding;GO:0005524//ATP binding	GO:0006468//protein phosphorylation
miR-281-x	XM_016913469.2	1190	1211	-17.45	gTCTCTCGAGCGTGCA-CTGgat	x||||||||xx|x|x|x|||xxx	aAGAGAGCTATC-CATCGACagt	TP53INP2	XP_006568121.2 tumor protein p53-inducible nuclear protein 2 isoform X1 [Apis mellifera]	Cellular Processes	Transport and catabolism	ko04140//Autophagy - animal	K21247	-	-	-
miR-281-x	XM_016913580.2	226	247	-17.4	tTCTCTCGTTATAGAGCgcgcc	x|||||||x||xxx|||xxxxx	aAGAGAGCTATCCATCGacagt	--	XP_016769069.2 uncharacterized protein LOC107964845 [Apis mellifera]	-	-	-	-	-	-	-
miR-281-x	XM_016913630.2	108	130	-19.52	cTCTCTCGGACTTGTCGTTGTta	x|||||||x|xxx||x|:|||xx	aAGAGAGC-TATCCATCGACAgt	Phox2a	XP_016769119.1 paired mesoderm homeobox protein 2A [Apis mellifera]	-	-	-	-	-	GO:0003677//DNA binding	GO:0006355//regulation of transcription, DNA-templated
miR-281-x	XM_016913781.2	40	61	-13.3	aTCTCTCGccgcaaccgccgca	x|||||||xxxxxxxxxxxxxx	aAGAGAGCtatccatcgacagt	KCNIP1	XP_006617637.1 Kv channel-interacting protein 1 [Apis dorsata]	-	-	-	-	-	GO:0004553//hydrolase activity, hydrolyzing O-glycosyl compounds;GO:0005509//calcium ion binding;GO:0005515//protein binding	GO:0000272//polysaccharide catabolic process
miR-281-x	XM_016913782.2	40	61	-13.3	aTCTCTCGccgcaaccgccgca	x|||||||xxxxxxxxxxxxxx	aAGAGAGCtatccatcgacagt	KCNIP1	XP_006617637.1 Kv channel-interacting protein 1 [Apis dorsata]	-	-	-	-	-	GO:0004553//hydrolase activity, hydrolyzing O-glycosyl compounds;GO:0005509//calcium ion binding;GO:0005515//protein binding	GO:0000272//polysaccharide catabolic process
miR-281-x	XM_016913784.2	40	61	-13.3	aTCTCTCGccgcaaccgccgca	x|||||||xxxxxxxxxxxxxx	aAGAGAGCtatccatcgacagt	KCNIP1	XP_006617637.1 Kv channel-interacting protein 1 [Apis dorsata]	-	-	-	-	-	GO:0004553//hydrolase activity, hydrolyzing O-glycosyl compounds;GO:0005509//calcium ion binding;GO:0005515//protein binding	GO:0000272//polysaccharide catabolic process
miR-281-x	XM_016913786.2	40	61	-13.3	aTCTCTCGccgcaaccgccgca	x|||||||xxxxxxxxxxxxxx	aAGAGAGCtatccatcgacagt	KCNIP1	XP_006617637.1 Kv channel-interacting protein 1 [Apis dorsata]	-	-	-	-	-	GO:0004553//hydrolase activity, hydrolyzing O-glycosyl compounds;GO:0005509//calcium ion binding;GO:0005515//protein binding	GO:0000272//polysaccharide catabolic process
miR-281-x	XM_016913787.2	40	61	-13.3	aTCTCTCGccgcaaccgccgca	x|||||||xxxxxxxxxxxxxx	aAGAGAGCtatccatcgacagt	KCNIP1	XP_006617637.1 Kv channel-interacting protein 1 [Apis dorsata]	-	-	-	-	-	GO:0004553//hydrolase activity, hydrolyzing O-glycosyl compounds;GO:0005509//calcium ion binding;GO:0005515//protein binding	GO:0000272//polysaccharide catabolic process
miR-281-x	XM_016913819.2	2132	2152	-12.9	aTCTCTCGACAC-TACTTcaaa	x||||||||x|xx||x:|xxxx	aAGAGAGCTATCCATCGAcagt	TEAD1	XP_016769308.1 transcriptional enhancer factor TEF-1 isoform X1 [Apis mellifera]	Environmental Information Processing;Environmental Information Processing;Environmental Information Processing	Signal transduction;Signal transduction;Signal transduction	ko04390//Hippo signaling pathway;ko04391//Hippo signaling pathway -fly;ko04392//Hippo signaling pathway - multiple species	K09448;K09448;K09448	-	GO:0003700//transcription factor activity, sequence-specific DNA binding	GO:0006355//regulation of transcription, DNA-templated
miR-281-x	XM_016913824.2	2132	2152	-12.9	aTCTCTCGACAC-TACTTcaaa	x||||||||x|xx||x:|xxxx	aAGAGAGCTATCCATCGAcagt	sd	XP_016769313.1 protein scalloped isoform X8 [Apis mellifera]	Environmental Information Processing;Environmental Information Processing;Environmental Information Processing	Signal transduction;Signal transduction;Signal transduction	ko04390//Hippo signaling pathway;ko04391//Hippo signaling pathway -fly;ko04392//Hippo signaling pathway - multiple species	K09448;K09448;K09448	-	GO:0003700//transcription factor activity, sequence-specific DNA binding	GO:0006355//regulation of transcription, DNA-templated
miR-281-x	XM_016913826.2	2132	2152	-12.9	aTCTCTCGACAC-TACTTcaaa	x||||||||x|xx||x:|xxxx	aAGAGAGCTATCCATCGAcagt	TEAD1	XP_016769315.1 transcriptional enhancer factor TEF-1 isoform X9 [Apis mellifera]	Environmental Information Processing;Environmental Information Processing;Environmental Information Processing	Signal transduction;Signal transduction;Signal transduction	ko04390//Hippo signaling pathway;ko04391//Hippo signaling pathway -fly;ko04392//Hippo signaling pathway - multiple species	K09448;K09448;K09448	-	GO:0003700//transcription factor activity, sequence-specific DNA binding	GO:0006355//regulation of transcription, DNA-templated
miR-281-x	XM_016913948.2	1577	1598	-11.69	cTCTCTCGCTCTCTCTCTCTca	x|||||||x|xxx|xx||x|xx	aAGAGAGCTATCCATCGACAgt	--	XP_006567531.1 uncharacterized protein LOC725634 isoform X1 [Apis mellifera]	-	-	-	-	-	GO:0005102//receptor binding	-
miR-281-x	XM_016913959.2	1218	1237	-22.1	cTCTCTCG-T-GTTGGCTGTgt	x|||||||x|x|x|:|||||xx	aAGAGAGCTATCCATCGACAgt	--	XP_016769448.2 uncharacterized protein LOC100576640 isoform X1 [Apis mellifera]	Environmental Information Processing;Human Diseases;Genetic Information Processing;Human Diseases;Human Diseases;Genetic Information Processing;Genetic Information Processing	Signal transduction;Cancers;Folding, sorting and degradation;Cancers;Drug resistance;Replication and repair;Replication and repair	ko04151//PI3K-Akt signaling pathway;ko05206//MicroRNAs in cancer;ko04120//Ubiquitin mediated proteolysis;ko05224//Breast cancer;ko01524//Platinum drug resistance;ko03440//Homologous recombination;ko03460//Fanconi anemia pathway	K10605;K10605;K10605;K10605;K10605;K10605;K10605	-	GO:0008270//zinc ion binding;GO:0046872//metal ion binding	-
miR-281-x	XM_016913962.2	1218	1237	-22.1	cTCTCTCG-T-GTTGGCTGTgt	x|||||||x|x|x|:|||||xx	aAGAGAGCTATCCATCGACAgt	--	XP_016769451.2 uncharacterized protein LOC100576640 isoform X3 [Apis mellifera]	Environmental Information Processing;Human Diseases;Genetic Information Processing;Human Diseases;Human Diseases;Genetic Information Processing;Genetic Information Processing	Signal transduction;Cancers;Folding, sorting and degradation;Cancers;Drug resistance;Replication and repair;Replication and repair	ko04151//PI3K-Akt signaling pathway;ko05206//MicroRNAs in cancer;ko04120//Ubiquitin mediated proteolysis;ko05224//Breast cancer;ko01524//Platinum drug resistance;ko03440//Homologous recombination;ko03460//Fanconi anemia pathway	K10605;K10605;K10605;K10605;K10605;K10605;K10605	-	-	-
miR-281-x	XM_016914023.2	3359	3381	-16.6	tTCTCTCGTTCAGCTtctctaaa	x|||||||x|x||x|xxxxxxxx	aAGAGAGCTA-TCCAtcgacagt	--	XP_016769512.1 organic solute transporter alpha-like protein [Apis mellifera]	Organismal Systems	Digestive system	ko04976//Bile secretion	K14360	-	-	-
miR-281-x	XM_016914024.2	3359	3381	-16.6	tTCTCTCGTTCAGCTtctctaaa	x|||||||x|x||x|xxxxxxxx	aAGAGAGCTA-TCCAtcgacagt	--	XP_016769512.1 organic solute transporter alpha-like protein [Apis mellifera]	Organismal Systems	Digestive system	ko04976//Bile secretion	K14360	-	-	-
miR-281-x	XM_016914055.2	1185	1206	-17.94	tTCTCTCGAAAGcgctaaaata	x||||||||x||xxxxxxxxxx	aAGAGAGCTATCcatcgacagt	--	XP_016769544.2 zwei Ig domain protein zig-8 isoform X1 [Apis mellifera]	-	-	-	-	-	-	-
miR-281-x	XM_016914056.2	1185	1206	-17.94	tTCTCTCGAAAGcgctaaaata	x||||||||x||xxxxxxxxxx	aAGAGAGCTATCcatcgacagt	--	XP_016769544.2 zwei Ig domain protein zig-8 isoform X1 [Apis mellifera]	-	-	-	-	-	-	-
miR-281-x	XM_016914057.2	1185	1206	-17.94	tTCTCTCGAAAGcgctaaaata	x||||||||x||xxxxxxxxxx	aAGAGAGCTATCcatcgacagt	--	XP_016769544.2 zwei Ig domain protein zig-8 isoform X1 [Apis mellifera]	-	-	-	-	-	-	-
miR-281-x	XM_016914058.2	1185	1206	-17.94	tTCTCTCGAAAGcgctaaaata	x||||||||x||xxxxxxxxxx	aAGAGAGCTATCcatcgacagt	--	XP_016769544.2 zwei Ig domain protein zig-8 isoform X1 [Apis mellifera]	-	-	-	-	-	-	-
miR-281-x	XM_016914103.2	28	49	-10.15	cTCTCTCGTTttaattaattta	x|||||||x|xxxxxxxxxxxx	aAGAGAGCTAtccatcgacagt	--	XP_006561848.2 fibroin heavy chain isoform X4 [Apis mellifera]	-	-	-	-	-	-	-
miR-281-x	XM_016914181.2	639	659	-13.9	tTCTCTCGTTAAATAA-TGTgc	x|||||||x||xx||xx|||xx	aAGAGAGCTATCCATCGACAgt	NLGN4X	XP_006561898.2 uncharacterized protein LOC724358 isoform X1 [Apis mellifera]	Environmental Information Processing	Signaling molecules and interaction	ko04514//Cell adhesion molecules (CAMs)	K07378	-	GO:0016787//hydrolase activity	-
miR-281-x	XM_016914243.2	1189	1210	-11.09	cTCTCTCGTTCTCTCTCTCTtt	x|||||||x|xxx|xx||x|xx	aAGAGAGCTATCCATCGACAgt	FHL2	XP_016769732.2 four and a half LIM domains protein 2 isoform X2 [Apis mellifera]	-	-	-	-	-	-	-
miR-281-x	XM_016914244.2	1189	1210	-11.09	cTCTCTCGTTCTCTCTCTCTtt	x|||||||x|xxx|xx||x|xx	aAGAGAGCTATCCATCGACAgt	FHL2	XP_016769733.2 four and a half LIM domains protein 2 isoform X3 [Apis mellifera]	-	-	-	-	-	-	-
miR-281-x	XM_016914245.2	1189	1210	-11.09	cTCTCTCGTTCTCTCTCTCTtt	x|||||||x|xxx|xx||x|xx	aAGAGAGCTATCCATCGACAgt	FHL2	XP_016769734.2 uncharacterized protein LOC410211 isoform X9 [Apis mellifera]	-	-	-	-	-	GO:0008270//zinc ion binding	-
miR-281-x	XM_016914248.2	1189	1210	-11.09	cTCTCTCGTTCTCTCTCTCTtt	x|||||||x|xxx|xx||x|xx	aAGAGAGCTATCCATCGACAgt	FHL2	XP_026299168.1 four and a half LIM domains protein 2 isoform X11 [Apis mellifera]	-	-	-	-	-	-	-
miR-281-x	XM_016914249.2	1189	1210	-11.09	cTCTCTCGTTCTCTCTCTCTtt	x|||||||x|xxx|xx||x|xx	aAGAGAGCTATCCATCGACAgt	Fhl2	XP_016769738.1 four and a half LIM domains protein 2 isoform X14 [Apis mellifera]	-	-	-	-	-	-	-
miR-281-x	XM_016914350.2	72	93	-12.05	cTCTCTCGCTctcgacttagag	x|||||||x|xxxxxxxxxxxx	aAGAGAGCTAtccatcgacagt	Rims2	XP_016769839.1 uncharacterized protein LOC410001 isoform X16 [Apis mellifera]	Organismal Systems	Endocrine system	ko04911//Insulin secretion	K15297	-	GO:0005515//protein binding	-
miR-281-x	XM_016914402.2	97	120	-14.9	cTCTCTCGCACTAGAAAGTctaaa	x|||||||x|x|||xx||:xxxxx	aAGAGAGC-T-ATCCATCGacagt	Hpgd	XP_016769891.1 15-hydroxyprostaglandin dehydrogenase [NAD(+)] isoform X3 [Apis mellifera]	Human Diseases	Cancers	ko05202//Transcriptional misregulation in cancers	K00069	-	GO:0003824//catalytic activity;GO:0004316//3-oxoacyl-[acyl-carrier-protein] reductase (NADPH) activity;GO:0004757//sepiapterin reductase activity;GO:0008460//dTDP-glucose 4,6-dehydratase activity;GO:0008667//2,3-dihydro-2,3-dihydroxybenzoate dehydrogenase activity;GO:0008678//2-deoxy-D-gluconate 3-dehydrogenase activity;GO:0016491//oxidoreductase activity;GO:0050662//coenzyme binding;GO:0051287//…	GO:0000272//polysaccharide catabolic process;GO:0006633//fatty acid biosynthetic process;GO:0006729//tetrahydrobiopterin biosynthetic process;GO:0009243//O antigen biosynthetic process;GO:0019305//dTDP-rhamnose biosynthetic process;GO:0055114//oxidation-reduction process
miR-281-x	XM_016914403.2	97	120	-14.9	cTCTCTCGCACTAGAAAGTctaaa	x|||||||x|x|||xx||:xxxxx	aAGAGAGC-T-ATCCATCGacagt	Hpgd	XP_016769891.1 15-hydroxyprostaglandin dehydrogenase [NAD(+)] isoform X3 [Apis mellifera]	Human Diseases	Cancers	ko05202//Transcriptional misregulation in cancers	K00069	-	GO:0003824//catalytic activity;GO:0004316//3-oxoacyl-[acyl-carrier-protein] reductase (NADPH) activity;GO:0004757//sepiapterin reductase activity;GO:0008460//dTDP-glucose 4,6-dehydratase activity;GO:0008667//2,3-dihydro-2,3-dihydroxybenzoate dehydrogenase activity;GO:0008678//2-deoxy-D-gluconate 3-dehydrogenase activity;GO:0016491//oxidoreductase activity;GO:0050662//coenzyme binding;GO:0051287//…	GO:0000272//polysaccharide catabolic process;GO:0006633//fatty acid biosynthetic process;GO:0006729//tetrahydrobiopterin biosynthetic process;GO:0009243//O antigen biosynthetic process;GO:0019305//dTDP-rhamnose biosynthetic process;GO:0055114//oxidation-reduction process
miR-281-x	XM_016914491.2	1216	1239	-18.57	tTCTCTCGTTTCTCTAAGCTGcct	x|||||||x|xxxx||x||||xxx	aAGAGAGCTATCC-AT-CGACagt	Pdk1	XP_016769980.1 3-phosphoinositide-dependent protein kinase 1 isoform X2 [Apis mellifera]	Human Diseases;Environmental Information Processing;Organismal Systems;Environmental Information Processing;Organismal Systems;Cellular Processes;Organismal Systems;Cellular Processes;Human Diseases;Environmental Information Processing;Environmental Information Processing;Human Diseases;Environmental Information Processing;Organismal Systems;Human Diseases;Human Diseases;Cellular Processes;Organi…	Cancers;Signal transduction;Endocrine system;Signal transduction;Endocrine system;Cellular community - eukaryotes;Nervous system;Transport and catabolism;Endocrine and metabolic diseases;Signal transduction;Signal transduction;Cancers;Signal transduction;Immune system;Cancers;Cancers;Cell growth and death;Endocrine system;Infectious diseases;Drug resistance;Cancers;Excretory system;Immune system	ko05205//Proteoglycans in cancer;ko04151//PI3K-Akt signaling pathway;ko04919//Thyroid hormone signaling pathway;ko04150//mTOR signaling pathway;ko04910//Insulin signaling pathway;ko04510//Focal adhesion;ko04722//Neurotrophin signaling pathway;ko04140//Autophagy - animal;ko04931//Insulin resistance;ko04152//AMPK signaling pathway;ko04068//FoxO signaling pathway;ko05231//Choline metabolism in cance…	K06276;K06276;K06276;K06276;K06276;K06276;K06276;K06276;K06276;K06276;K06276;K06276;K06276;K06276;K06276;K06276;K06276;K06276;K06276;K06276;K06276;K06276;K06276	GO:0000124//SAGA complex	GO:0003712//transcription cofactor activity;GO:0004672//protein kinase activity;GO:0005524//ATP binding	GO:0006468//protein phosphorylation
miR-281-x	XM_016914689.2	271	294	-15.48	gTCTCTCGATTTAAGTAtagaata	x|||||||||xx|x|||xxxxxxx	aAGAGAGCTA--TCCATcgacagt	TBC1D13	XP_016770178.2 TBC1 domain family member 13 isoform X1 [Apis mellifera]	-	-	-	-	-	-	-
miR-281-x	XM_016914695.2	271	294	-15.48	gTCTCTCGATTTAAGTAtagaata	x|||||||||xx|x|||xxxxxxx	aAGAGAGCTA--TCCATcgacagt	TBC1D13	XP_016770184.2 TBC1 domain family member 13 isoform X2 [Apis mellifera]	-	-	-	-	-	-	-
miR-281-x	XM_016914719.2	393	414	-11.14	cTCTCTCGTTttcacttttcaa	x|||||||x|xxxxxxxxxxxx	aAGAGAGCTAtccatcgacagt	Dpp6	XP_016770208.1 dipeptidyl aminopeptidase-like protein 6 isoform X1 [Apis mellifera]	-	-	-	-	-	GO:0008236//serine-type peptidase activity;GO:0016787//hydrolase activity	GO:0006508//proteolysis
miR-281-x	XM_016914720.2	393	414	-11.14	cTCTCTCGTTttcacttttcaa	x|||||||x|xxxxxxxxxxxx	aAGAGAGCTAtccatcgacagt	Dpp6	XP_016770208.1 dipeptidyl aminopeptidase-like protein 6 isoform X1 [Apis mellifera]	-	-	-	-	-	GO:0008236//serine-type peptidase activity;GO:0016787//hydrolase activity	GO:0006508//proteolysis
miR-281-x	XM_016914905.2	7246	7266	-12.48	gTCTCTCGAC-GATATTTtgcc	x||||||||xx|x||x:|xxxx	aAGAGAGCTATCCATCGAcagt	Myc	XP_016770394.1 uncharacterized protein LOC100576392 isoform X1 [Apis mellifera]	Human Diseases;Environmental Information Processing;Environmental Information Processing;Human Diseases;Human Diseases;Human Diseases;Environmental Information Processing;Environmental Information Processing;Organismal Systems;Human Diseases;Cellular Processes;Human Diseases;Human Diseases;Human Diseases;Cellular Processes;Environmental Information Processing;Cellular Processes;Human Diseases;Hum…	Cancers;Signal transduction;Signal transduction;Infectious diseases;Cancers;Infectious diseases;Signal transduction;Signal transduction;Endocrine system;Infectious diseases;Cell growth and death;Cancers;Cancers;Cancers;Cell growth and death;Signal transduction;Cellular community - eukaryotes;Cancers;Infectious diseases;Signal transduction;Cancers;Cancers;Infectious diseases;Cancers;Infectious dis…	ko05200//Pathways in cancer;ko04310//Wnt signaling pathway;ko04010//MAPK signaling pathway;ko05166//HTLV-I infection;ko05205//Proteoglycans in cancer;ko05132//Salmonella infection;ko04151//PI3K-Akt signaling pathway;ko04390//Hippo signaling pathway;ko04919//Thyroid hormone signaling pathway;ko05163//Human cytomegalovirus infection;ko04110//Cell cycle;ko05206//MicroRNAs in cancer;ko05202//Transcri…	K04377;K04377;K04377;K04377;K04377;K04377;K04377;K04377;K04377;K04377;K04377;K04377;K04377;K04377;K04377;K04377;K04377;K04377;K04377;K04377;K04377;K04377;K04377;K04377;K04377;K04377;K04377;K04377;K04377;K04377;K04377;K04377;K04377;K04377	-	GO:0003700//transcription factor activity, sequence-specific DNA binding;GO:0046983//protein dimerization activity	GO:0006355//regulation of transcription, DNA-templated
miR-281-x	XM_016914906.2	7246	7266	-12.48	gTCTCTCGAC-GATATTTtgcc	x||||||||xx|x||x:|xxxx	aAGAGAGCTATCCATCGAcagt	Myc	XP_016770394.1 uncharacterized protein LOC100576392 isoform X1 [Apis mellifera]	Human Diseases;Environmental Information Processing;Environmental Information Processing;Human Diseases;Human Diseases;Human Diseases;Environmental Information Processing;Environmental Information Processing;Organismal Systems;Human Diseases;Cellular Processes;Human Diseases;Human Diseases;Human Diseases;Cellular Processes;Environmental Information Processing;Cellular Processes;Human Diseases;Hum…	Cancers;Signal transduction;Signal transduction;Infectious diseases;Cancers;Infectious diseases;Signal transduction;Signal transduction;Endocrine system;Infectious diseases;Cell growth and death;Cancers;Cancers;Cancers;Cell growth and death;Signal transduction;Cellular community - eukaryotes;Cancers;Infectious diseases;Signal transduction;Cancers;Cancers;Infectious diseases;Cancers;Infectious dis…	ko05200//Pathways in cancer;ko04310//Wnt signaling pathway;ko04010//MAPK signaling pathway;ko05166//HTLV-I infection;ko05205//Proteoglycans in cancer;ko05132//Salmonella infection;ko04151//PI3K-Akt signaling pathway;ko04390//Hippo signaling pathway;ko04919//Thyroid hormone signaling pathway;ko05163//Human cytomegalovirus infection;ko04110//Cell cycle;ko05206//MicroRNAs in cancer;ko05202//Transcri…	K04377;K04377;K04377;K04377;K04377;K04377;K04377;K04377;K04377;K04377;K04377;K04377;K04377;K04377;K04377;K04377;K04377;K04377;K04377;K04377;K04377;K04377;K04377;K04377;K04377;K04377;K04377;K04377;K04377;K04377;K04377;K04377;K04377;K04377	-	GO:0003700//transcription factor activity, sequence-specific DNA binding;GO:0046983//protein dimerization activity	GO:0006355//regulation of transcription, DNA-templated
miR-281-x	XM_016915209.2	461	482	-14.42	cTCTCTCGtccttaaagcagaa	x|||||||xxxxxxxxxxxxxx	aAGAGAGCtatccatcgacagt	caup	XP_006559002.1 iroquois-class homeodomain protein IRX-6 isoform X1 [Apis mellifera]	-	-	-	-	-	GO:0003677//DNA binding	GO:0006355//regulation of transcription, DNA-templated
miR-281-x	XM_016915211.2	461	482	-14.42	cTCTCTCGtccttaaagcagaa	x|||||||xxxxxxxxxxxxxx	aAGAGAGCtatccatcgacagt	caup	XP_006559002.1 iroquois-class homeodomain protein IRX-6 isoform X1 [Apis mellifera]	-	-	-	-	-	GO:0003677//DNA binding	GO:0006355//regulation of transcription, DNA-templated
miR-281-x	XM_016915365.2	3792	3813	-22.51	cTCTCTCGCTAGGgccaggtca	x|||||||x||||xxxxxxxxx	aAGAGAGCTATCCatcgacagt	--	XP_016770854.2 uncharacterized protein LOC102655102 [Apis mellifera]	-	-	-	-	-	-	-
miR-281-x	XM_016915675.2	1475	1495	-14.05	tTCTCTCG-TCGTTTGCccatg	x|||||||x|x|x|x||xxxxx	aAGAGAGCTATCCATCGacagt	FOXP4	XP_026300326.1 foxP protein isoform X12 [Apis mellifera]	-	-	-	-	-	GO:0003700//transcription factor activity, sequence-specific DNA binding;GO:0043565//sequence-specific DNA binding	GO:0006355//regulation of transcription, DNA-templated
miR-281-x	XM_016915753.2	1178	1200	-13.23	gTCTCTCGTTTACTTTGCgcgga	x|||||||x|x|xx|x||xxxxx	aAGAGAGCTA-TCCATCGacagt	ab	XP_016771242.1 protein abrupt isoform X2 [Apis mellifera]	-	-	-	-	-	GO:0003677//DNA binding;GO:0005515//protein binding;GO:0008270//zinc ion binding	GO:0006355//regulation of transcription, DNA-templated
miR-281-x	XM_016915756.2	323	344	-12.83	cTCTCTCGtgctcccatcttac	x|||||||xxxxxxxxxxxxxx	aAGAGAGCtatccatcgacagt	ab	XP_016771245.1 broad-complex core protein isoforms 1/2/3/4/5 isoform X7 [Apis mellifera]	-	-	-	-	-	GO:0005515//protein binding	-
miR-281-x	XM_016915762.2	1590	1613	-16.65	gTCTCTCGTATAGCCTTGGTGcca	x|||||||x||||xx|x|x||xxx	aAGAGAGC-TATCC-ATCGACagt	--	XP_016771251.1 uncharacterized protein LOC100578263 [Apis mellifera]	-	-	-	-	-	-	-
miR-281-x	XM_016915816.2	1910	1931	-16.33	gTCTCTCGAGATGAAcagcagg	x||||||||x|x|x|xxxxxxx	aAGAGAGCTATCCATcgacagt	Elavl2	XP_006571228.1 ELAV-like protein 3 isoform X1 [Apis mellifera]	-	-	-	-	GO:0005634//nucleus;GO:0005737//cytoplasm	GO:0003676//nucleic acid binding;GO:0003723//RNA binding;GO:0004535//poly(A)-specific ribonuclease activity;GO:0046872//metal ion binding	GO:0006402//mRNA catabolic process;GO:0008380//RNA splicing
miR-281-x	XM_016915842.2	2937	2960	-15.08	tTCTCTCGGGAAAGTGAACTtcgc	x|||||||xx|x||xx|x||xxxx	aAGAGAGC--TATCCATCGAcagt	POU6F2	XP_016771331.1 POU domain, class 6, transcription factor 1 isoform X1 [Apis mellifera]	-	-	-	-	-	GO:0003677//DNA binding;GO:0003700//transcription factor activity, sequence-specific DNA binding	GO:0006355//regulation of transcription, DNA-templated
miR-281-x	XM_016915845.2	2937	2960	-15.08	tTCTCTCGGGAAAGTGAACTtcgc	x|||||||xx|x||xx|x||xxxx	aAGAGAGC--TATCCATCGAcagt	POU6F2	XP_031772954.1 POU domain, class 6, transcription factor 1 isoform X1 [Apis florea]	-	-	-	-	-	GO:0003677//DNA binding;GO:0003700//transcription factor activity, sequence-specific DNA binding	GO:0006355//regulation of transcription, DNA-templated
miR-281-x	XM_016915919.2	4323	4344	-15.01	tTCTCTCGTAAGCAAACAGcga	x|||||||xx||xx|x|x|xxx	aAGAGAGCTATCCATCGACagt	--	XP_016771408.2 uncharacterized protein LOC725354 isoform X1 [Apis mellifera]	-	-	-	-	-	-	-
miR-281-x	XM_016915981.2	1428	1448	-14.53	tTCTCTCGA-ATTTAGaaataa	x||||||||x|xx|||xxxxxx	aAGAGAGCTATCCATCgacagt	GluClalpha	XP_006616221.1 glutamate-gated chloride channel isoform X4 [Apis dorsata]	-	-	-	-	GO:0016021//integral component of membrane	GO:0005230//extracellular ligand-gated ion channel activity	GO:0006811//ion transport
miR-281-x	XM_016915982.2	1428	1448	-14.53	tTCTCTCGA-ATTTAGaaataa	x||||||||x|xx|||xxxxxx	aAGAGAGCTATCCATCgacagt	GluClalpha	NP_001071277.1 glutamate-gated chloride channel precursor [Apis mellifera]	-	-	-	-	GO:0016021//integral component of membrane	GO:0005230//extracellular ligand-gated ion channel activity	GO:0006811//ion transport
miR-281-x	XM_016915983.2	1428	1448	-14.53	tTCTCTCGA-ATTTAGaaataa	x||||||||x|xx|||xxxxxx	aAGAGAGCTATCCATCgacagt	GluClalpha	XP_006560233.1 glutamate-gated chloride channel isoform X3 [Apis mellifera]	-	-	-	-	GO:0016021//integral component of membrane	GO:0005230//extracellular ligand-gated ion channel activity	GO:0006811//ion transport
miR-281-x	XM_016915984.2	1428	1448	-14.53	tTCTCTCGA-ATTTAGaaataa	x||||||||x|xx|||xxxxxx	aAGAGAGCTATCCATCgacagt	GluClalpha	XP_006560233.1 glutamate-gated chloride channel isoform X3 [Apis mellifera]	-	-	-	-	GO:0016021//integral component of membrane	GO:0005230//extracellular ligand-gated ion channel activity	GO:0006811//ion transport
miR-281-x	XM_016915985.2	1428	1448	-14.53	tTCTCTCGA-ATTTAGaaataa	x||||||||x|xx|||xxxxxx	aAGAGAGCTATCCATCgacagt	GluClalpha	XP_006616225.1 glutamate-gated chloride channel isoform X8 [Apis dorsata]	-	-	-	-	GO:0016021//integral component of membrane	GO:0005230//extracellular ligand-gated ion channel activity	GO:0006811//ion transport
miR-281-x	XM_016915988.2	3963	3984	-13.25	gTCTCTCGCTCGTTTGCTcgct	x|||||||x|x|x|x|||xxxx	aAGAGAGCTATCCATCGAcagt	epha4-a	XP_016771477.1 eph receptor tyrosine kinase isoform X9 [Apis mellifera]	Organismal Systems;Organismal Systems	Development;Development and regeneration	ko04360//Axon guidance;ko04361//Axon regeneration	K05110;K05110	-	GO:0003993//acid phosphatase activity;GO:0004672//protein kinase activity;GO:0005515//protein binding;GO:0005524//ATP binding;GO:0046872//metal ion binding	GO:0006468//protein phosphorylation
miR-281-x	XM_016915990.2	3963	3984	-13.25	gTCTCTCGCTCGTTTGCTcgct	x|||||||x|x|x|x|||xxxx	aAGAGAGCTATCCATCGAcagt	epha4-a	XP_016771479.1 eph receptor tyrosine kinase isoform X18 [Apis mellifera]	Organismal Systems;Organismal Systems	Development;Development and regeneration	ko04360//Axon guidance;ko04361//Axon regeneration	K05110;K05110	-	GO:0003993//acid phosphatase activity;GO:0004672//protein kinase activity;GO:0005515//protein binding;GO:0005524//ATP binding;GO:0046872//metal ion binding	GO:0006468//protein phosphorylation
miR-281-x	XM_016916294.2	1531	1552	-11.7	cTCTCTCGCTTGcacttacgct	x|||||||x|x|xxxxxxxxxx	aAGAGAGCTATCcatcgacagt	SOX8	XP_016771783.1 transcription factor Sox-10 isoform X1 [Apis mellifera]	Environmental Information Processing	Signal transduction	ko04024//cAMP signaling pathway	K18435	-	-	-
miR-281-x	XM_016916295.2	1531	1552	-11.7	cTCTCTCGCTTGcacttacgct	x|||||||x|x|xxxxxxxxxx	aAGAGAGCTATCcatcgacagt	SOX8	XP_016771784.1 transcription factor Sox-10 isoform X3 [Apis mellifera]	Environmental Information Processing	Signal transduction	ko04024//cAMP signaling pathway	K18435	-	-	-
miR-281-x	XM_016916453.2	9446	9467	-14.73	cTCTCTCGAGACGTTTCTTTag	x||||||||x|x||xx||x|xx	aAGAGAGCTATCCATCGACAgt	Mblk-1	XP_016771942.2 mushroom body large-type Kenyon cell-specific protein 1 isoform X2 [Apis mellifera]	Cellular Processes	Cell growth and death	ko04214//Apoptosis - fly	K20015	-	GO:0003677//DNA binding	-
miR-281-x	XM_016916455.2	9446	9467	-14.73	cTCTCTCGAGACGTTTCTTTag	x||||||||x|x||xx||x|xx	aAGAGAGCTATCCATCGACAgt	Mblk-1	XP_016771944.2 mushroom body large-type Kenyon cell-specific protein 1 isoform X3 [Apis mellifera]	Cellular Processes	Cell growth and death	ko04214//Apoptosis - fly	K20015	-	GO:0003677//DNA binding	-
miR-281-x	XM_016916565.2	1481	1502	-15.05	aTCTCTCG-TCGCTAAGCgagca	x|||||||x|x|x||x||xxxxx	aAGAGAGCTATCCAT-CGacagt	--	XP_016772054.1 uncharacterized protein LOC409667 isoform X2 [Apis mellifera]	Human Diseases;Cellular Processes;Environmental Information Processing;Cellular Processes;Human Diseases	Infectious diseases;Transport and catabolism;Signal transduction;Transport and catabolism;Infectious diseases	ko05131//Shigellosis;ko04140//Autophagy - animal;ko04068//FoxO signaling pathway;ko04137//Mitophagy - animal;ko05134//Legionellosis	K15464;K15464;K15464;K15464;K15464	GO:0005740//mitochondrial envelope;GO:0016021//integral component of membrane	-	GO:0043065//positive regulation of apoptotic process
miR-281-x	XM_016916818.2	525	547	-25.92	cTCTCTCGCTGGGAAAGCTGTgc	x|||||||x|:||x|x|||||xx	aAGAGAGCTATCCAT-CGACAgt	ACE	XP_016772307.1 angiotensin-converting enzyme isoform X1 [Apis mellifera]	Human Diseases;Organismal Systems;Human Diseases;Organismal Systems	Cardiovascular diseases;Endocrine system;Infectious diseases;Endocrine system	ko05410//Hypertrophic cardiomyopathy (HCM);ko04924//Renin secretion;ko05142//Chagas disease (American trypanosomiasis);ko04614//Renin-angiotensin system	K01283;K01283;K01283;K01283	GO:0016020//membrane	GO:0008237//metallopeptidase activity;GO:0008241//peptidyl-dipeptidase activity	GO:0006508//proteolysis
miR-281-x	XM_016916853.1	1915	1935	-13.79	aTCTCTCG-TAACCATATGTta	x|||||||x||xxx|xx|||xx	aAGAGAGCTATCCATCGACAgt	Wnt4	XP_003693516.1 protein Wnt-1-like isoform X2 [Apis florea]	Human Diseases;Human Diseases;Human Diseases;Environmental Information Processing;Human Diseases;Human Diseases;Organismal Systems;Environmental Information Processing;Organismal Systems;Environmental Information Processing;Human Diseases;Organismal Systems;Cellular Processes;Human Diseases;Human Diseases;Human Diseases	Cancers;Neurodegenerative diseases;Infectious diseases;Signal transduction;Endocrine and metabolic diseases;Cancers;Development;Signal transduction;Endocrine system;Signal transduction;Cancers;Endocrine system;Cellular community - eukaryotes;Cancers;Cancers;Cancers	ko05200//Pathways in cancer;ko05010//Alzheimer disease;ko05165//Human papillomavirus infection;ko04310//Wnt signaling pathway;ko04934//Cushing syndrome;ko05205//Proteoglycans in cancer;ko04360//Axon guidance;ko04390//Hippo signaling pathway;ko04919//Thyroid hormone signaling pathway;ko04150//mTOR signaling pathway;ko05225//Hepatocellular carcinoma;ko04916//Melanogenesis;ko04550//Signaling pathway…	K00408;K00408;K00408;K00408;K00408;K00408;K00408;K00408;K00408;K00408;K00408;K00408;K00408;K00408;K00408;K00408	GO:0005576//extracellular region	GO:0005102//receptor binding	GO:0007275//multicellular organism development;GO:0016055//Wnt signaling pathway
miR-281-x	XM_016917298.2	1271	1292	-12.73	cTCTCTCGTTGCTTTGTTcgag	x|||||||x|:xx|x|:|xxxx	aAGAGAGCTATCCATCGAcagt	brat	XP_003251836.1 brain tumor protein [Apis mellifera]	-	-	-	-	-	GO:0005515//protein binding;GO:0008270//zinc ion binding;GO:0016755//transferase activity, transferring amino-acyl groups	GO:0019184//nonribosomal peptide biosynthetic process
miR-281-x	XM_016917415.2	1042	1063	-14.71	tTCTCTCGCAAGCGCA-TTGTtt	x|||||||xx||x|x|x:|||xx	aAGAGAGCTATC-CATCGACAgt	--	XP_006621183.1 F-box only protein 43-like isoform X1 [Apis dorsata]	Cellular Processes	Cell growth and death	ko04114//Oocyte meiosis	K10318	GO:0030117//membrane coat	GO:0005515//protein binding	GO:0006886//intracellular protein transport;GO:0016192//vesicle-mediated transport
miR-281-x	XM_016917495.2	354	376	-17.16	aTCTCTCGTTATGTGCGCTATgt	x|||||||x||x||:x|||x|xx	aAGAGAGCTATCCAT-CGACAgt	REM1	XP_016772984.2 uncharacterized protein LOC107964025 isoform X2 [Apis mellifera]	-	-	-	-	GO:0005737//cytoplasm	GO:0003924//GTPase activity;GO:0005525//GTP binding;GO:0043022//ribosome binding	GO:0042254//ribosome biogenesis
miR-281-x	XM_016918097.2	3024	3044	-18.85	tTCTCTCGGTGAGC-GCTATta	x|||||||:|:x|xx|||x|xx	aAGAGAGCTATCCATCGACAgt	HIPK2	XP_016773586.2 homeodomain-interacting protein kinase 2 isoform X15 [Apis mellifera]	Cellular Processes	Cell growth and death	ko04218//Cellular senescence	K08826	-	GO:0004672//protein kinase activity;GO:0005524//ATP binding	GO:0006468//protein phosphorylation
miR-281-x	XM_016918144.2	1369	1389	-13.06	tTCTCTCG-TAAGTcttagatt	x|||||||x||x||xxxxxxxx	aAGAGAGCTATCCAtcgacagt	Wdr47	XP_016773633.1 WD repeat-containing protein 47 isoform X1 [Apis mellifera]	-	-	-	-	-	GO:0005515//protein binding	-
miR-281-x	XM_016918147.2	1369	1389	-13.06	tTCTCTCG-TAAGTcttagatt	x|||||||x||x||xxxxxxxx	aAGAGAGCTATCCAtcgacagt	Wdr47	XP_016773636.1 WD repeat-containing protein 47 isoform X3 [Apis mellifera]	-	-	-	-	-	GO:0005515//protein binding	-
miR-281-x	XM_026439005.1	3347	3367	-10.15	cTCTCTCG-TAatcattcggaa	x|||||||x||xxxxxxxxxxx	aAGAGAGCTATccatcgacagt	OtopLc	XP_026294790.1 proton channel OtopLc isoform X1 [Apis mellifera]	-	-	-	-	-	-	-
miR-281-x	XM_026439006.1	3347	3367	-10.15	cTCTCTCG-TAatcattcggaa	x|||||||x||xxxxxxxxxxx	aAGAGAGCTATccatcgacagt	OtopLc	XP_026294790.1 proton channel OtopLc isoform X1 [Apis mellifera]	-	-	-	-	-	-	-
miR-281-x	XM_026439007.1	3347	3367	-10.15	cTCTCTCG-TAatcattcggaa	x|||||||x||xxxxxxxxxxx	aAGAGAGCTATccatcgacagt	OtopLc	XP_026294790.1 proton channel OtopLc isoform X1 [Apis mellifera]	-	-	-	-	-	-	-
miR-281-x	XM_026439100.1	3313	3334	-18.89	tTCTCTCGGTCAGTACTAGTgg	x|||||||:|xx|||x:x||xx	aAGAGAGCTATCCATCGACAgt	celf1	XP_026294885.1 CUGBP Elav-like family member 2 isoform X1 [Apis mellifera]	Organismal Systems	Development	ko04320//Dorso-ventral axis formation	K02177	GO:0005634//nucleus;GO:0005737//cytoplasm	GO:0003676//nucleic acid binding;GO:0003723//RNA binding;GO:0004535//poly(A)-specific ribonuclease activity;GO:0046872//metal ion binding	GO:0006402//mRNA catabolic process;GO:0008380//RNA splicing
miR-281-x	XM_026439104.1	3313	3334	-18.89	tTCTCTCGGTCAGTACTAGTgg	x|||||||:|xx|||x:x||xx	aAGAGAGCTATCCATCGACAgt	celf1	XP_026294889.1 CUGBP Elav-like family member 2 isoform X2 [Apis mellifera]	Organismal Systems	Development	ko04320//Dorso-ventral axis formation	K02177	GO:0005634//nucleus;GO:0005737//cytoplasm	GO:0003676//nucleic acid binding;GO:0003723//RNA binding;GO:0004535//poly(A)-specific ribonuclease activity;GO:0046872//metal ion binding	GO:0006402//mRNA catabolic process;GO:0008380//RNA splicing
miR-281-x	XM_026439112.1	3310	3331	-18.89	tTCTCTCGGTCAGTACTAGTgg	x|||||||:|xx|||x:x||xx	aAGAGAGCTATCCATCGACAgt	celf1	XP_026294885.1 CUGBP Elav-like family member 2 isoform X1 [Apis mellifera]	Organismal Systems	Development	ko04320//Dorso-ventral axis formation	K02177	GO:0005634//nucleus;GO:0005737//cytoplasm	GO:0003676//nucleic acid binding;GO:0003723//RNA binding;GO:0004535//poly(A)-specific ribonuclease activity;GO:0046872//metal ion binding	GO:0006402//mRNA catabolic process;GO:0008380//RNA splicing
miR-281-x	XM_026439114.1	3309	3330	-18.89	tTCTCTCGGTCAGTACTAGTgg	x|||||||:|xx|||x:x||xx	aAGAGAGCTATCCATCGACAgt	celf1	XP_026294885.1 CUGBP Elav-like family member 2 isoform X1 [Apis mellifera]	Organismal Systems	Development	ko04320//Dorso-ventral axis formation	K02177	GO:0005634//nucleus;GO:0005737//cytoplasm	GO:0003676//nucleic acid binding;GO:0003723//RNA binding;GO:0004535//poly(A)-specific ribonuclease activity;GO:0046872//metal ion binding	GO:0006402//mRNA catabolic process;GO:0008380//RNA splicing
miR-281-x	XM_026439115.1	3306	3327	-18.89	tTCTCTCGGTCAGTACTAGTgg	x|||||||:|xx|||x:x||xx	aAGAGAGCTATCCATCGACAgt	celf1	XP_026294885.1 CUGBP Elav-like family member 2 isoform X1 [Apis mellifera]	Organismal Systems	Development	ko04320//Dorso-ventral axis formation	K02177	GO:0005634//nucleus;GO:0005737//cytoplasm	GO:0003676//nucleic acid binding;GO:0003723//RNA binding;GO:0004535//poly(A)-specific ribonuclease activity;GO:0046872//metal ion binding	GO:0006402//mRNA catabolic process;GO:0008380//RNA splicing
miR-281-x	XM_026439119.1	3313	3334	-18.89	tTCTCTCGGTCAGTACTAGTgg	x|||||||:|xx|||x:x||xx	aAGAGAGCTATCCATCGACAgt	cugbp1-a	XP_026294904.1 CUGBP Elav-like family member 2 isoform X3 [Apis mellifera]	Organismal Systems	Development	ko04320//Dorso-ventral axis formation	K02177	GO:0005634//nucleus;GO:0005737//cytoplasm	GO:0003676//nucleic acid binding;GO:0003723//RNA binding;GO:0004535//poly(A)-specific ribonuclease activity;GO:0046872//metal ion binding	GO:0006402//mRNA catabolic process;GO:0008380//RNA splicing
miR-281-x	XM_026439121.1	3313	3334	-18.89	tTCTCTCGGTCAGTACTAGTgg	x|||||||:|xx|||x:x||xx	aAGAGAGCTATCCATCGACAgt	celf1	XP_026294906.1 CUGBP Elav-like family member 2 isoform X4 [Apis mellifera]	Organismal Systems	Development	ko04320//Dorso-ventral axis formation	K02177	GO:0005634//nucleus;GO:0005737//cytoplasm	GO:0003676//nucleic acid binding;GO:0003723//RNA binding;GO:0004535//poly(A)-specific ribonuclease activity;GO:0046872//metal ion binding	GO:0006402//mRNA catabolic process;GO:0008380//RNA splicing
miR-281-x	XM_026439125.1	3313	3334	-18.89	tTCTCTCGGTCAGTACTAGTgg	x|||||||:|xx|||x:x||xx	aAGAGAGCTATCCATCGACAgt	celf1	XP_026294910.1 CUGBP Elav-like family member 2 isoform X5 [Apis mellifera]	Organismal Systems	Development	ko04320//Dorso-ventral axis formation	K02177	GO:0005634//nucleus;GO:0005737//cytoplasm	GO:0003676//nucleic acid binding;GO:0003723//RNA binding;GO:0004535//poly(A)-specific ribonuclease activity;GO:0046872//metal ion binding	GO:0006402//mRNA catabolic process;GO:0008380//RNA splicing
miR-281-x	XM_026439126.1	3313	3334	-18.89	tTCTCTCGGTCAGTACTAGTgg	x|||||||:|xx|||x:x||xx	aAGAGAGCTATCCATCGACAgt	celf2	XP_026294911.1 CUGBP Elav-like family member 2 isoform X6 [Apis mellifera]	Organismal Systems	Development	ko04320//Dorso-ventral axis formation	K02177	GO:0005634//nucleus;GO:0005737//cytoplasm	GO:0003676//nucleic acid binding;GO:0003723//RNA binding;GO:0004535//poly(A)-specific ribonuclease activity;GO:0046872//metal ion binding	GO:0006402//mRNA catabolic process;GO:0008380//RNA splicing
miR-281-x	XM_026439128.1	3313	3334	-18.89	tTCTCTCGGTCAGTACTAGTgg	x|||||||:|xx|||x:x||xx	aAGAGAGCTATCCATCGACAgt	celf1	XP_026294913.1 CUGBP Elav-like family member 2 isoform X7 [Apis mellifera]	Organismal Systems	Development	ko04320//Dorso-ventral axis formation	K02177	GO:0005634//nucleus;GO:0005737//cytoplasm	GO:0003676//nucleic acid binding;GO:0003723//RNA binding;GO:0004535//poly(A)-specific ribonuclease activity;GO:0046872//metal ion binding	GO:0006402//mRNA catabolic process;GO:0008380//RNA splicing
miR-281-x	XM_026439129.1	3313	3334	-18.89	tTCTCTCGGTCAGTACTAGTgg	x|||||||:|xx|||x:x||xx	aAGAGAGCTATCCATCGACAgt	CELF2	XP_026294914.1 CUGBP Elav-like family member 2 isoform X8 [Apis mellifera]	Organismal Systems	Development	ko04320//Dorso-ventral axis formation	K02177	GO:0005634//nucleus;GO:0005737//cytoplasm	GO:0003676//nucleic acid binding;GO:0003723//RNA binding;GO:0004535//poly(A)-specific ribonuclease activity;GO:0046872//metal ion binding	GO:0006402//mRNA catabolic process;GO:0008380//RNA splicing
miR-281-x	XM_026439134.1	3313	3334	-18.89	tTCTCTCGGTCAGTACTAGTgg	x|||||||:|xx|||x:x||xx	aAGAGAGCTATCCATCGACAgt	celf1	XP_026294889.1 CUGBP Elav-like family member 2 isoform X2 [Apis mellifera]	Organismal Systems	Development	ko04320//Dorso-ventral axis formation	K02177	GO:0005634//nucleus;GO:0005737//cytoplasm	GO:0003676//nucleic acid binding;GO:0003723//RNA binding;GO:0004535//poly(A)-specific ribonuclease activity;GO:0046872//metal ion binding	GO:0006402//mRNA catabolic process;GO:0008380//RNA splicing
miR-281-x	XM_026439136.1	3313	3334	-18.89	tTCTCTCGGTCAGTACTAGTgg	x|||||||:|xx|||x:x||xx	aAGAGAGCTATCCATCGACAgt	celf1	XP_026294889.1 CUGBP Elav-like family member 2 isoform X2 [Apis mellifera]	Organismal Systems	Development	ko04320//Dorso-ventral axis formation	K02177	GO:0005634//nucleus;GO:0005737//cytoplasm	GO:0003676//nucleic acid binding;GO:0003723//RNA binding;GO:0004535//poly(A)-specific ribonuclease activity;GO:0046872//metal ion binding	GO:0006402//mRNA catabolic process;GO:0008380//RNA splicing
miR-281-x	XM_026439138.1	3313	3334	-18.89	tTCTCTCGGTCAGTACTAGTgg	x|||||||:|xx|||x:x||xx	aAGAGAGCTATCCATCGACAgt	celf1	XP_026294889.1 CUGBP Elav-like family member 2 isoform X2 [Apis mellifera]	Organismal Systems	Development	ko04320//Dorso-ventral axis formation	K02177	GO:0005634//nucleus;GO:0005737//cytoplasm	GO:0003676//nucleic acid binding;GO:0003723//RNA binding;GO:0004535//poly(A)-specific ribonuclease activity;GO:0046872//metal ion binding	GO:0006402//mRNA catabolic process;GO:0008380//RNA splicing
miR-281-x	XM_026439141.1	3313	3334	-18.89	tTCTCTCGGTCAGTACTAGTgg	x|||||||:|xx|||x:x||xx	aAGAGAGCTATCCATCGACAgt	celf1	XP_026294889.1 CUGBP Elav-like family member 2 isoform X2 [Apis mellifera]	Organismal Systems	Development	ko04320//Dorso-ventral axis formation	K02177	GO:0005634//nucleus;GO:0005737//cytoplasm	GO:0003676//nucleic acid binding;GO:0003723//RNA binding;GO:0004535//poly(A)-specific ribonuclease activity;GO:0046872//metal ion binding	GO:0006402//mRNA catabolic process;GO:0008380//RNA splicing
miR-281-x	XM_026439142.1	713	731	-18.37	cTCTCTCG-TAG-T-GCTCTct	x|||||||x|||x|x|||x|xx	aAGAGAGCTATCCATCGACAgt	--	XP_026294927.1 uncharacterized protein LOC102654309 [Apis mellifera]	-	-	-	-	-	-	-
miR-281-x	XM_026439144.1	3313	3334	-18.89	tTCTCTCGGTCAGTACTAGTgg	x|||||||:|xx|||x:x||xx	aAGAGAGCTATCCATCGACAgt	celf1	XP_026294889.1 CUGBP Elav-like family member 2 isoform X2 [Apis mellifera]	Organismal Systems	Development	ko04320//Dorso-ventral axis formation	K02177	GO:0005634//nucleus;GO:0005737//cytoplasm	GO:0003676//nucleic acid binding;GO:0003723//RNA binding;GO:0004535//poly(A)-specific ribonuclease activity;GO:0046872//metal ion binding	GO:0006402//mRNA catabolic process;GO:0008380//RNA splicing
miR-281-x	XM_026439148.1	3313	3334	-18.89	tTCTCTCGGTCAGTACTAGTgg	x|||||||:|xx|||x:x||xx	aAGAGAGCTATCCATCGACAgt	celf1	XP_026294889.1 CUGBP Elav-like family member 2 isoform X2 [Apis mellifera]	Organismal Systems	Development	ko04320//Dorso-ventral axis formation	K02177	GO:0005634//nucleus;GO:0005737//cytoplasm	GO:0003676//nucleic acid binding;GO:0003723//RNA binding;GO:0004535//poly(A)-specific ribonuclease activity;GO:0046872//metal ion binding	GO:0006402//mRNA catabolic process;GO:0008380//RNA splicing
miR-281-x	XM_026439155.1	3313	3334	-18.89	tTCTCTCGGTCAGTACTAGTgg	x|||||||:|xx|||x:x||xx	aAGAGAGCTATCCATCGACAgt	celf1	XP_026294940.1 CUGBP Elav-like family member 2 isoform X10 [Apis mellifera]	Organismal Systems	Development	ko04320//Dorso-ventral axis formation	K02177	GO:0005634//nucleus;GO:0005737//cytoplasm	GO:0003676//nucleic acid binding;GO:0003723//RNA binding;GO:0004535//poly(A)-specific ribonuclease activity;GO:0046872//metal ion binding	GO:0006402//mRNA catabolic process;GO:0008380//RNA splicing
miR-281-x	XM_026439159.1	3313	3334	-18.89	tTCTCTCGGTCAGTACTAGTgg	x|||||||:|xx|||x:x||xx	aAGAGAGCTATCCATCGACAgt	celf1	XP_026294944.1 CUGBP Elav-like family member 1 isoform X11 [Apis mellifera]	Organismal Systems	Development	ko04320//Dorso-ventral axis formation	K02177	GO:0005634//nucleus;GO:0005737//cytoplasm	GO:0003676//nucleic acid binding;GO:0003723//RNA binding;GO:0004535//poly(A)-specific ribonuclease activity;GO:0046872//metal ion binding	GO:0006402//mRNA catabolic process;GO:0008380//RNA splicing
miR-281-x	XM_026439162.1	3313	3334	-18.89	tTCTCTCGGTCAGTACTAGTgg	x|||||||:|xx|||x:x||xx	aAGAGAGCTATCCATCGACAgt	celf1	XP_026294947.1 CUGBP Elav-like family member 2 isoform X12 [Apis mellifera]	Organismal Systems	Development	ko04320//Dorso-ventral axis formation	K02177	GO:0005634//nucleus;GO:0005737//cytoplasm	GO:0003676//nucleic acid binding;GO:0003723//RNA binding;GO:0004535//poly(A)-specific ribonuclease activity;GO:0046872//metal ion binding	GO:0006402//mRNA catabolic process;GO:0008380//RNA splicing
miR-281-x	XM_026439163.1	3313	3334	-18.89	tTCTCTCGGTCAGTACTAGTgg	x|||||||:|xx|||x:x||xx	aAGAGAGCTATCCATCGACAgt	cugbp1-a	XP_026294948.1 CUGBP Elav-like family member 2 isoform X13 [Apis mellifera]	Organismal Systems	Development	ko04320//Dorso-ventral axis formation	K02177	GO:0005634//nucleus;GO:0005737//cytoplasm	GO:0003676//nucleic acid binding;GO:0003723//RNA binding;GO:0004535//poly(A)-specific ribonuclease activity;GO:0046872//metal ion binding	GO:0006402//mRNA catabolic process;GO:0008380//RNA splicing
miR-281-x	XM_026439170.1	3313	3334	-18.89	tTCTCTCGGTCAGTACTAGTgg	x|||||||:|xx|||x:x||xx	aAGAGAGCTATCCATCGACAgt	celf2	XP_026294955.1 CUGBP Elav-like family member 2 isoform X14 [Apis mellifera]	Organismal Systems	Development	ko04320//Dorso-ventral axis formation	K02177	GO:0005634//nucleus;GO:0005737//cytoplasm	GO:0003676//nucleic acid binding;GO:0003723//RNA binding;GO:0004535//poly(A)-specific ribonuclease activity;GO:0046872//metal ion binding	GO:0006402//mRNA catabolic process;GO:0008380//RNA splicing
miR-281-x	XM_026439173.1	3313	3334	-18.89	tTCTCTCGGTCAGTACTAGTgg	x|||||||:|xx|||x:x||xx	aAGAGAGCTATCCATCGACAgt	CELF2	XP_026294958.1 CUGBP Elav-like family member 2 isoform X15 [Apis mellifera]	Organismal Systems	Development	ko04320//Dorso-ventral axis formation	K02177	GO:0005634//nucleus;GO:0005737//cytoplasm	GO:0003676//nucleic acid binding;GO:0003723//RNA binding;GO:0004535//poly(A)-specific ribonuclease activity;GO:0046872//metal ion binding	GO:0006402//mRNA catabolic process;GO:0008380//RNA splicing
miR-281-x	XM_026439177.1	3313	3334	-18.89	tTCTCTCGGTCAGTACTAGTgg	x|||||||:|xx|||x:x||xx	aAGAGAGCTATCCATCGACAgt	celf1	XP_026294962.1 CUGBP Elav-like family member 2 isoform X16 [Apis mellifera]	Organismal Systems	Development	ko04320//Dorso-ventral axis formation	K02177	GO:0005634//nucleus;GO:0005737//cytoplasm	GO:0003676//nucleic acid binding;GO:0003723//RNA binding;GO:0004535//poly(A)-specific ribonuclease activity;GO:0046872//metal ion binding	GO:0006402//mRNA catabolic process;GO:0008380//RNA splicing
miR-281-x	XM_026439182.1	3313	3334	-18.89	tTCTCTCGGTCAGTACTAGTgg	x|||||||:|xx|||x:x||xx	aAGAGAGCTATCCATCGACAgt	cugbp1-a	XP_026294967.1 CUGBP Elav-like family member 2 isoform X17 [Apis mellifera]	Organismal Systems	Development	ko04320//Dorso-ventral axis formation	K02177	GO:0005634//nucleus;GO:0005737//cytoplasm	GO:0003676//nucleic acid binding;GO:0003723//RNA binding;GO:0004535//poly(A)-specific ribonuclease activity;GO:0046872//metal ion binding	GO:0006402//mRNA catabolic process;GO:0008380//RNA splicing
miR-281-x	XM_026439190.1	3313	3334	-18.89	tTCTCTCGGTCAGTACTAGTgg	x|||||||:|xx|||x:x||xx	aAGAGAGCTATCCATCGACAgt	celf1	XP_026294978.1 CUGBP Elav-like family member 2 isoform X19 [Apis mellifera]	Organismal Systems	Development	ko04320//Dorso-ventral axis formation	K02177	GO:0005634//nucleus;GO:0005737//cytoplasm	GO:0003676//nucleic acid binding;GO:0003723//RNA binding;GO:0004535//poly(A)-specific ribonuclease activity;GO:0046872//metal ion binding	GO:0006402//mRNA catabolic process;GO:0008380//RNA splicing
miR-281-x	XM_026439193.1	3313	3334	-18.89	tTCTCTCGGTCAGTACTAGTgg	x|||||||:|xx|||x:x||xx	aAGAGAGCTATCCATCGACAgt	celf1	XP_026294978.1 CUGBP Elav-like family member 2 isoform X19 [Apis mellifera]	Organismal Systems	Development	ko04320//Dorso-ventral axis formation	K02177	GO:0005634//nucleus;GO:0005737//cytoplasm	GO:0003676//nucleic acid binding;GO:0003723//RNA binding;GO:0004535//poly(A)-specific ribonuclease activity;GO:0046872//metal ion binding	GO:0006402//mRNA catabolic process;GO:0008380//RNA splicing
miR-281-x	XM_026439196.1	1354	1375	-14.63	aTCTCTCGTTATATAGTgatac	x|||||||x||xx|||:xxxxx	aAGAGAGCTATCCATCGacagt	TFAP2A	XP_016906527.1 transcription factor AP-2-epsilon isoform X1 [Apis cerana]	-	-	-	-	-	-	-
miR-281-x	XM_026439197.1	1354	1375	-14.63	aTCTCTCGTTATATAGTgatac	x|||||||x||xx|||:xxxxx	aAGAGAGCTATCCATCGacagt	TFAP2A	XP_026294982.1 transcription factor AP-2-epsilon isoform X2 [Apis mellifera]	-	-	-	-	-	-	-
miR-281-x	XM_026439198.1	1354	1375	-14.63	aTCTCTCGTTATATAGTgatac	x|||||||x||xx|||:xxxxx	aAGAGAGCTATCCATCGacagt	TFAP2A	XP_012347767.1 transcription factor AP-2-epsilon isoform X3 [Apis florea]	-	-	-	-	-	-	-
miR-281-x	XM_026439199.1	1354	1375	-14.63	aTCTCTCGTTATATAGTgatac	x|||||||x||xx|||:xxxxx	aAGAGAGCTATCCATCGacagt	TFAP2A	XP_026294984.1 transcription factor AP-2-epsilon isoform X4 [Apis mellifera]	-	-	-	-	-	-	-
miR-281-x	XM_026439200.1	1354	1375	-14.63	aTCTCTCGTTATATAGTgatac	x|||||||x||xx|||:xxxxx	aAGAGAGCTATCCATCGacagt	TFAP2A	XP_012347769.1 transcription factor AP-2-epsilon isoform X4 [Apis florea]	-	-	-	-	-	-	-
miR-281-x	XM_026439201.1	1354	1375	-14.63	aTCTCTCGTTATATAGTgatac	x|||||||x||xx|||:xxxxx	aAGAGAGCTATCCATCGacagt	TFAP2A	XP_012347769.1 transcription factor AP-2-epsilon isoform X4 [Apis florea]	-	-	-	-	-	-	-
miR-281-x	XM_026439202.1	1354	1375	-14.63	aTCTCTCGTTATATAGTgatac	x|||||||x||xx|||:xxxxx	aAGAGAGCTATCCATCGacagt	TFAP2A	XP_012347769.1 transcription factor AP-2-epsilon isoform X4 [Apis florea]	-	-	-	-	-	-	-
miR-281-x	XM_026439203.1	1354	1375	-14.63	aTCTCTCGTTATATAGTgatac	x|||||||x||xx|||:xxxxx	aAGAGAGCTATCCATCGacagt	TFAP2A	XP_026294988.1 transcription factor AP-2-epsilon isoform X6 [Apis mellifera]	-	-	-	-	-	-	-
miR-281-x	XM_026439204.1	1354	1375	-14.63	aTCTCTCGTTATATAGTgatac	x|||||||x||xx|||:xxxxx	aAGAGAGCTATCCATCGacagt	TFAP2A	XP_012347773.1 transcription factor AP-2-epsilon isoform X5 [Apis florea]	-	-	-	-	-	-	-
miR-281-x	XM_026439205.1	1354	1375	-14.63	aTCTCTCGTTATATAGTgatac	x|||||||x||xx|||:xxxxx	aAGAGAGCTATCCATCGacagt	TFAP2A	XP_012347773.1 transcription factor AP-2-epsilon isoform X5 [Apis florea]	-	-	-	-	-	-	-
miR-281-x	XM_026439286.1	3024	3044	-18.85	tTCTCTCGGTGAGC-GCTATta	x|||||||:|:x|xx|||x|xx	aAGAGAGCTATCCATCGACAgt	HIPK2	XP_006568944.2 homeodomain-interacting protein kinase 2 isoform X1 [Apis mellifera]	Cellular Processes	Cell growth and death	ko04218//Cellular senescence	K08826	-	GO:0004672//protein kinase activity;GO:0005524//ATP binding	GO:0006468//protein phosphorylation
miR-281-x	XM_026439309.1	806	827	-16.6	gTCTCTCGCAAGGGGGggaagg	x|||||||xx|||x:|xxxxxx	aAGAGAGCTATCCATCgacagt	CAC	XP_026295094.1 voltage-dependent calcium channel type A subunit alpha-1 isoform X2 [Apis mellifera]	Human Diseases;Environmental Information Processing;Environmental Information Processing;Organismal Systems;Organismal Systems;Organismal Systems;Organismal Systems;Human Diseases;Organismal Systems;Organismal Systems;Human Diseases;Human Diseases	Neurodegenerative diseases;Signal transduction;Signal transduction;Nervous system;Nervous system;Nervous system;Nervous system;Substance dependence;Nervous system;Nervous system;Endocrine and metabolic diseases;Substance dependence	ko05016//Huntington disease;ko04010//MAPK signaling pathway;ko04020//Calcium signaling pathway;ko04728//Dopaminergic synapse;ko04721//Synaptic vesicle cycle;ko04725//Cholinergic synapse;ko04723//Retrograde endocannabinoid signaling;ko05032//Morphine addiction;ko04726//Serotonergic synapse;ko04727//GABAergic synapse;ko04930//Type II diabetes mellitus;ko05033//Nicotine addiction	K04849;K04849;K04849;K04849;K04849;K04849;K04849;K04849;K04849;K04849;K04849;K04849	GO:0016020//membrane	GO:0005216//ion channel activity;GO:0005509//calcium ion binding	GO:0006811//ion transport;GO:0055085//transmembrane transport
miR-281-x	XM_026439310.1	806	827	-16.6	gTCTCTCGCAAGGGGGggaagg	x|||||||xx|||x:|xxxxxx	aAGAGAGCTATCCATCgacagt	CAC	XP_026295095.1 voltage-dependent calcium channel type A subunit alpha-1 isoform X3 [Apis mellifera]	Human Diseases;Environmental Information Processing;Environmental Information Processing;Organismal Systems;Organismal Systems;Organismal Systems;Organismal Systems;Human Diseases;Organismal Systems;Organismal Systems;Human Diseases;Human Diseases	Neurodegenerative diseases;Signal transduction;Signal transduction;Nervous system;Nervous system;Nervous system;Nervous system;Substance dependence;Nervous system;Nervous system;Endocrine and metabolic diseases;Substance dependence	ko05016//Huntington disease;ko04010//MAPK signaling pathway;ko04020//Calcium signaling pathway;ko04728//Dopaminergic synapse;ko04721//Synaptic vesicle cycle;ko04725//Cholinergic synapse;ko04723//Retrograde endocannabinoid signaling;ko05032//Morphine addiction;ko04726//Serotonergic synapse;ko04727//GABAergic synapse;ko04930//Type II diabetes mellitus;ko05033//Nicotine addiction	K04849;K04849;K04849;K04849;K04849;K04849;K04849;K04849;K04849;K04849;K04849;K04849	GO:0016020//membrane	GO:0005216//ion channel activity;GO:0005509//calcium ion binding	GO:0006811//ion transport;GO:0055085//transmembrane transport
miR-281-x	XM_026439311.1	806	827	-16.6	gTCTCTCGCAAGGGGGggaagg	x|||||||xx|||x:|xxxxxx	aAGAGAGCTATCCATCgacagt	CAC	XP_026295096.1 voltage-dependent calcium channel type A subunit alpha-1 isoform X4 [Apis mellifera]	Human Diseases;Environmental Information Processing;Environmental Information Processing;Organismal Systems;Organismal Systems;Organismal Systems;Organismal Systems;Human Diseases;Organismal Systems;Organismal Systems;Human Diseases;Human Diseases	Neurodegenerative diseases;Signal transduction;Signal transduction;Nervous system;Nervous system;Nervous system;Nervous system;Substance dependence;Nervous system;Nervous system;Endocrine and metabolic diseases;Substance dependence	ko05016//Huntington disease;ko04010//MAPK signaling pathway;ko04020//Calcium signaling pathway;ko04728//Dopaminergic synapse;ko04721//Synaptic vesicle cycle;ko04725//Cholinergic synapse;ko04723//Retrograde endocannabinoid signaling;ko05032//Morphine addiction;ko04726//Serotonergic synapse;ko04727//GABAergic synapse;ko04930//Type II diabetes mellitus;ko05033//Nicotine addiction	K04849;K04849;K04849;K04849;K04849;K04849;K04849;K04849;K04849;K04849;K04849;K04849	GO:0016020//membrane	GO:0005216//ion channel activity;GO:0005509//calcium ion binding	GO:0006811//ion transport;GO:0055085//transmembrane transport
miR-281-x	XM_026439312.1	806	827	-16.6	gTCTCTCGCAAGGGGGggaagg	x|||||||xx|||x:|xxxxxx	aAGAGAGCTATCCATCgacagt	CAC	XP_026295097.1 voltage-dependent calcium channel type A subunit alpha-1 isoform X5 [Apis mellifera]	Human Diseases;Environmental Information Processing;Environmental Information Processing;Organismal Systems;Organismal Systems;Organismal Systems;Organismal Systems;Human Diseases;Organismal Systems;Organismal Systems;Human Diseases;Human Diseases	Neurodegenerative diseases;Signal transduction;Signal transduction;Nervous system;Nervous system;Nervous system;Nervous system;Substance dependence;Nervous system;Nervous system;Endocrine and metabolic diseases;Substance dependence	ko05016//Huntington disease;ko04010//MAPK signaling pathway;ko04020//Calcium signaling pathway;ko04728//Dopaminergic synapse;ko04721//Synaptic vesicle cycle;ko04725//Cholinergic synapse;ko04723//Retrograde endocannabinoid signaling;ko05032//Morphine addiction;ko04726//Serotonergic synapse;ko04727//GABAergic synapse;ko04930//Type II diabetes mellitus;ko05033//Nicotine addiction	K04849;K04849;K04849;K04849;K04849;K04849;K04849;K04849;K04849;K04849;K04849;K04849	GO:0016020//membrane	GO:0005216//ion channel activity;GO:0005509//calcium ion binding	GO:0006811//ion transport;GO:0055085//transmembrane transport
miR-281-x	XM_026439313.1	806	827	-16.6	gTCTCTCGCAAGGGGGggaagg	x|||||||xx|||x:|xxxxxx	aAGAGAGCTATCCATCgacagt	CAC	XP_026295098.1 voltage-dependent calcium channel type A subunit alpha-1 isoform X6 [Apis mellifera]	Human Diseases;Environmental Information Processing;Environmental Information Processing;Organismal Systems;Organismal Systems;Organismal Systems;Organismal Systems;Human Diseases;Organismal Systems;Organismal Systems;Human Diseases;Human Diseases	Neurodegenerative diseases;Signal transduction;Signal transduction;Nervous system;Nervous system;Nervous system;Nervous system;Substance dependence;Nervous system;Nervous system;Endocrine and metabolic diseases;Substance dependence	ko05016//Huntington disease;ko04010//MAPK signaling pathway;ko04020//Calcium signaling pathway;ko04728//Dopaminergic synapse;ko04721//Synaptic vesicle cycle;ko04725//Cholinergic synapse;ko04723//Retrograde endocannabinoid signaling;ko05032//Morphine addiction;ko04726//Serotonergic synapse;ko04727//GABAergic synapse;ko04930//Type II diabetes mellitus;ko05033//Nicotine addiction	K04849;K04849;K04849;K04849;K04849;K04849;K04849;K04849;K04849;K04849;K04849;K04849	GO:0016020//membrane	GO:0005216//ion channel activity;GO:0005509//calcium ion binding	GO:0006811//ion transport;GO:0055085//transmembrane transport
miR-281-x	XM_026439314.1	806	827	-16.6	gTCTCTCGCAAGGGGGggaagg	x|||||||xx|||x:|xxxxxx	aAGAGAGCTATCCATCgacagt	CAC	XP_026295099.1 voltage-dependent calcium channel type A subunit alpha-1 isoform X7 [Apis mellifera]	Human Diseases;Environmental Information Processing;Environmental Information Processing;Organismal Systems;Organismal Systems;Organismal Systems;Organismal Systems;Human Diseases;Organismal Systems;Organismal Systems;Human Diseases;Human Diseases	Neurodegenerative diseases;Signal transduction;Signal transduction;Nervous system;Nervous system;Nervous system;Nervous system;Substance dependence;Nervous system;Nervous system;Endocrine and metabolic diseases;Substance dependence	ko05016//Huntington disease;ko04010//MAPK signaling pathway;ko04020//Calcium signaling pathway;ko04728//Dopaminergic synapse;ko04721//Synaptic vesicle cycle;ko04725//Cholinergic synapse;ko04723//Retrograde endocannabinoid signaling;ko05032//Morphine addiction;ko04726//Serotonergic synapse;ko04727//GABAergic synapse;ko04930//Type II diabetes mellitus;ko05033//Nicotine addiction	K04849;K04849;K04849;K04849;K04849;K04849;K04849;K04849;K04849;K04849;K04849;K04849	GO:0016020//membrane	GO:0005216//ion channel activity;GO:0005509//calcium ion binding	GO:0006811//ion transport;GO:0055085//transmembrane transport
miR-281-x	XM_026439316.1	806	827	-16.6	gTCTCTCGCAAGGGGGggaagg	x|||||||xx|||x:|xxxxxx	aAGAGAGCTATCCATCgacagt	CAC	XP_026295101.1 voltage-dependent calcium channel type A subunit alpha-1 isoform X8 [Apis mellifera]	Human Diseases;Environmental Information Processing;Environmental Information Processing;Organismal Systems;Organismal Systems;Organismal Systems;Organismal Systems;Human Diseases;Organismal Systems;Organismal Systems;Human Diseases;Human Diseases	Neurodegenerative diseases;Signal transduction;Signal transduction;Nervous system;Nervous system;Nervous system;Nervous system;Substance dependence;Nervous system;Nervous system;Endocrine and metabolic diseases;Substance dependence	ko05016//Huntington disease;ko04010//MAPK signaling pathway;ko04020//Calcium signaling pathway;ko04728//Dopaminergic synapse;ko04721//Synaptic vesicle cycle;ko04725//Cholinergic synapse;ko04723//Retrograde endocannabinoid signaling;ko05032//Morphine addiction;ko04726//Serotonergic synapse;ko04727//GABAergic synapse;ko04930//Type II diabetes mellitus;ko05033//Nicotine addiction	K04849;K04849;K04849;K04849;K04849;K04849;K04849;K04849;K04849;K04849;K04849;K04849	GO:0016020//membrane	GO:0005216//ion channel activity;GO:0005509//calcium ion binding	GO:0006811//ion transport;GO:0055085//transmembrane transport
miR-281-x	XM_026439317.1	806	827	-16.6	gTCTCTCGCAAGGGGGggaagg	x|||||||xx|||x:|xxxxxx	aAGAGAGCTATCCATCgacagt	CAC	XP_026295102.1 voltage-dependent calcium channel type A subunit alpha-1 isoform X9 [Apis mellifera]	Human Diseases;Environmental Information Processing;Environmental Information Processing;Organismal Systems;Organismal Systems;Organismal Systems;Organismal Systems;Human Diseases;Organismal Systems;Organismal Systems;Human Diseases;Human Diseases	Neurodegenerative diseases;Signal transduction;Signal transduction;Nervous system;Nervous system;Nervous system;Nervous system;Substance dependence;Nervous system;Nervous system;Endocrine and metabolic diseases;Substance dependence	ko05016//Huntington disease;ko04010//MAPK signaling pathway;ko04020//Calcium signaling pathway;ko04728//Dopaminergic synapse;ko04721//Synaptic vesicle cycle;ko04725//Cholinergic synapse;ko04723//Retrograde endocannabinoid signaling;ko05032//Morphine addiction;ko04726//Serotonergic synapse;ko04727//GABAergic synapse;ko04930//Type II diabetes mellitus;ko05033//Nicotine addiction	K04849;K04849;K04849;K04849;K04849;K04849;K04849;K04849;K04849;K04849;K04849;K04849	GO:0016020//membrane	GO:0005216//ion channel activity;GO:0005509//calcium ion binding	GO:0006811//ion transport;GO:0055085//transmembrane transport
miR-281-x	XM_026439318.1	806	827	-16.6	gTCTCTCGCAAGGGGGggaagg	x|||||||xx|||x:|xxxxxx	aAGAGAGCTATCCATCgacagt	CAC	XP_026295103.1 voltage-dependent calcium channel type A subunit alpha-1 isoform X10 [Apis mellifera]	Human Diseases;Environmental Information Processing;Environmental Information Processing;Organismal Systems;Organismal Systems;Organismal Systems;Organismal Systems;Human Diseases;Organismal Systems;Organismal Systems;Human Diseases;Human Diseases	Neurodegenerative diseases;Signal transduction;Signal transduction;Nervous system;Nervous system;Nervous system;Nervous system;Substance dependence;Nervous system;Nervous system;Endocrine and metabolic diseases;Substance dependence	ko05016//Huntington disease;ko04010//MAPK signaling pathway;ko04020//Calcium signaling pathway;ko04728//Dopaminergic synapse;ko04721//Synaptic vesicle cycle;ko04725//Cholinergic synapse;ko04723//Retrograde endocannabinoid signaling;ko05032//Morphine addiction;ko04726//Serotonergic synapse;ko04727//GABAergic synapse;ko04930//Type II diabetes mellitus;ko05033//Nicotine addiction	K04849;K04849;K04849;K04849;K04849;K04849;K04849;K04849;K04849;K04849;K04849;K04849	GO:0016020//membrane	GO:0005216//ion channel activity;GO:0005509//calcium ion binding	GO:0006811//ion transport;GO:0055085//transmembrane transport
miR-281-x	XM_026439319.1	806	827	-16.6	gTCTCTCGCAAGGGGGggaagg	x|||||||xx|||x:|xxxxxx	aAGAGAGCTATCCATCgacagt	CAC	XP_026295104.1 voltage-dependent calcium channel type A subunit alpha-1 isoform X11 [Apis mellifera]	Human Diseases;Environmental Information Processing;Environmental Information Processing;Organismal Systems;Organismal Systems;Organismal Systems;Organismal Systems;Human Diseases;Organismal Systems;Organismal Systems;Human Diseases;Human Diseases	Neurodegenerative diseases;Signal transduction;Signal transduction;Nervous system;Nervous system;Nervous system;Nervous system;Substance dependence;Nervous system;Nervous system;Endocrine and metabolic diseases;Substance dependence	ko05016//Huntington disease;ko04010//MAPK signaling pathway;ko04020//Calcium signaling pathway;ko04728//Dopaminergic synapse;ko04721//Synaptic vesicle cycle;ko04725//Cholinergic synapse;ko04723//Retrograde endocannabinoid signaling;ko05032//Morphine addiction;ko04726//Serotonergic synapse;ko04727//GABAergic synapse;ko04930//Type II diabetes mellitus;ko05033//Nicotine addiction	K04849;K04849;K04849;K04849;K04849;K04849;K04849;K04849;K04849;K04849;K04849;K04849	GO:0016020//membrane	GO:0005216//ion channel activity;GO:0005509//calcium ion binding	GO:0006811//ion transport;GO:0055085//transmembrane transport
miR-281-x	XM_026439320.1	806	827	-16.6	gTCTCTCGCAAGGGGGggaagg	x|||||||xx|||x:|xxxxxx	aAGAGAGCTATCCATCgacagt	CAC	XP_026295105.1 voltage-dependent calcium channel type A subunit alpha-1 isoform X12 [Apis mellifera]	Human Diseases;Environmental Information Processing;Environmental Information Processing;Organismal Systems;Organismal Systems;Organismal Systems;Organismal Systems;Human Diseases;Organismal Systems;Organismal Systems;Human Diseases;Human Diseases	Neurodegenerative diseases;Signal transduction;Signal transduction;Nervous system;Nervous system;Nervous system;Nervous system;Substance dependence;Nervous system;Nervous system;Endocrine and metabolic diseases;Substance dependence	ko05016//Huntington disease;ko04010//MAPK signaling pathway;ko04020//Calcium signaling pathway;ko04728//Dopaminergic synapse;ko04721//Synaptic vesicle cycle;ko04725//Cholinergic synapse;ko04723//Retrograde endocannabinoid signaling;ko05032//Morphine addiction;ko04726//Serotonergic synapse;ko04727//GABAergic synapse;ko04930//Type II diabetes mellitus;ko05033//Nicotine addiction	K04849;K04849;K04849;K04849;K04849;K04849;K04849;K04849;K04849;K04849;K04849;K04849	GO:0016020//membrane	GO:0005216//ion channel activity;GO:0005509//calcium ion binding	GO:0006811//ion transport;GO:0055085//transmembrane transport
miR-281-x	XM_026439321.1	806	827	-16.6	gTCTCTCGCAAGGGGGggaagg	x|||||||xx|||x:|xxxxxx	aAGAGAGCTATCCATCgacagt	CAC	XP_026295106.1 voltage-dependent calcium channel type A subunit alpha-1 isoform X13 [Apis mellifera]	Human Diseases;Environmental Information Processing;Environmental Information Processing;Organismal Systems;Organismal Systems;Organismal Systems;Organismal Systems;Human Diseases;Organismal Systems;Organismal Systems;Human Diseases;Human Diseases	Neurodegenerative diseases;Signal transduction;Signal transduction;Nervous system;Nervous system;Nervous system;Nervous system;Substance dependence;Nervous system;Nervous system;Endocrine and metabolic diseases;Substance dependence	ko05016//Huntington disease;ko04010//MAPK signaling pathway;ko04020//Calcium signaling pathway;ko04728//Dopaminergic synapse;ko04721//Synaptic vesicle cycle;ko04725//Cholinergic synapse;ko04723//Retrograde endocannabinoid signaling;ko05032//Morphine addiction;ko04726//Serotonergic synapse;ko04727//GABAergic synapse;ko04930//Type II diabetes mellitus;ko05033//Nicotine addiction	K04849;K04849;K04849;K04849;K04849;K04849;K04849;K04849;K04849;K04849;K04849;K04849	GO:0016020//membrane	GO:0005216//ion channel activity;GO:0005509//calcium ion binding	GO:0006811//ion transport;GO:0055085//transmembrane transport
miR-281-x	XM_026439322.1	806	827	-16.6	gTCTCTCGCAAGGGGGggaagg	x|||||||xx|||x:|xxxxxx	aAGAGAGCTATCCATCgacagt	CAC	XP_026295107.1 voltage-dependent calcium channel type A subunit alpha-1 isoform X15 [Apis mellifera]	Human Diseases;Environmental Information Processing;Environmental Information Processing;Organismal Systems;Organismal Systems;Organismal Systems;Organismal Systems;Human Diseases;Organismal Systems;Organismal Systems;Human Diseases;Human Diseases	Neurodegenerative diseases;Signal transduction;Signal transduction;Nervous system;Nervous system;Nervous system;Nervous system;Substance dependence;Nervous system;Nervous system;Endocrine and metabolic diseases;Substance dependence	ko05016//Huntington disease;ko04010//MAPK signaling pathway;ko04020//Calcium signaling pathway;ko04728//Dopaminergic synapse;ko04721//Synaptic vesicle cycle;ko04725//Cholinergic synapse;ko04723//Retrograde endocannabinoid signaling;ko05032//Morphine addiction;ko04726//Serotonergic synapse;ko04727//GABAergic synapse;ko04930//Type II diabetes mellitus;ko05033//Nicotine addiction	K04849;K04849;K04849;K04849;K04849;K04849;K04849;K04849;K04849;K04849;K04849;K04849	GO:0016020//membrane	GO:0005216//ion channel activity;GO:0005509//calcium ion binding	GO:0006811//ion transport;GO:0055085//transmembrane transport
miR-281-x	XM_026439323.1	806	827	-16.6	gTCTCTCGCAAGGGGGggaagg	x|||||||xx|||x:|xxxxxx	aAGAGAGCTATCCATCgacagt	CAC	XP_026295108.1 voltage-dependent calcium channel type A subunit alpha-1 isoform X16 [Apis mellifera]	Human Diseases;Environmental Information Processing;Environmental Information Processing;Organismal Systems;Organismal Systems;Organismal Systems;Organismal Systems;Human Diseases;Organismal Systems;Organismal Systems;Human Diseases;Human Diseases	Neurodegenerative diseases;Signal transduction;Signal transduction;Nervous system;Nervous system;Nervous system;Nervous system;Substance dependence;Nervous system;Nervous system;Endocrine and metabolic diseases;Substance dependence	ko05016//Huntington disease;ko04010//MAPK signaling pathway;ko04020//Calcium signaling pathway;ko04728//Dopaminergic synapse;ko04721//Synaptic vesicle cycle;ko04725//Cholinergic synapse;ko04723//Retrograde endocannabinoid signaling;ko05032//Morphine addiction;ko04726//Serotonergic synapse;ko04727//GABAergic synapse;ko04930//Type II diabetes mellitus;ko05033//Nicotine addiction	K04849;K04849;K04849;K04849;K04849;K04849;K04849;K04849;K04849;K04849;K04849;K04849	GO:0016020//membrane	GO:0005216//ion channel activity;GO:0005509//calcium ion binding	GO:0006811//ion transport;GO:0055085//transmembrane transport
miR-281-x	XM_026439324.1	806	827	-16.6	gTCTCTCGCAAGGGGGggaagg	x|||||||xx|||x:|xxxxxx	aAGAGAGCTATCCATCgacagt	CAC	XP_026295109.1 voltage-dependent calcium channel type A subunit alpha-1 isoform X17 [Apis mellifera]	Human Diseases;Environmental Information Processing;Environmental Information Processing;Organismal Systems;Organismal Systems;Organismal Systems;Organismal Systems;Human Diseases;Organismal Systems;Organismal Systems;Human Diseases;Human Diseases	Neurodegenerative diseases;Signal transduction;Signal transduction;Nervous system;Nervous system;Nervous system;Nervous system;Substance dependence;Nervous system;Nervous system;Endocrine and metabolic diseases;Substance dependence	ko05016//Huntington disease;ko04010//MAPK signaling pathway;ko04020//Calcium signaling pathway;ko04728//Dopaminergic synapse;ko04721//Synaptic vesicle cycle;ko04725//Cholinergic synapse;ko04723//Retrograde endocannabinoid signaling;ko05032//Morphine addiction;ko04726//Serotonergic synapse;ko04727//GABAergic synapse;ko04930//Type II diabetes mellitus;ko05033//Nicotine addiction	K04849;K04849;K04849;K04849;K04849;K04849;K04849;K04849;K04849;K04849;K04849;K04849	GO:0016020//membrane	GO:0005216//ion channel activity;GO:0005509//calcium ion binding	GO:0006811//ion transport;GO:0055085//transmembrane transport
miR-281-x	XM_026439325.1	806	827	-16.6	gTCTCTCGCAAGGGGGggaagg	x|||||||xx|||x:|xxxxxx	aAGAGAGCTATCCATCgacagt	CAC	XP_026295110.1 voltage-dependent calcium channel type A subunit alpha-1 isoform X18 [Apis mellifera]	Human Diseases;Environmental Information Processing;Environmental Information Processing;Organismal Systems;Organismal Systems;Organismal Systems;Organismal Systems;Human Diseases;Organismal Systems;Organismal Systems;Human Diseases;Human Diseases	Neurodegenerative diseases;Signal transduction;Signal transduction;Nervous system;Nervous system;Nervous system;Nervous system;Substance dependence;Nervous system;Nervous system;Endocrine and metabolic diseases;Substance dependence	ko05016//Huntington disease;ko04010//MAPK signaling pathway;ko04020//Calcium signaling pathway;ko04728//Dopaminergic synapse;ko04721//Synaptic vesicle cycle;ko04725//Cholinergic synapse;ko04723//Retrograde endocannabinoid signaling;ko05032//Morphine addiction;ko04726//Serotonergic synapse;ko04727//GABAergic synapse;ko04930//Type II diabetes mellitus;ko05033//Nicotine addiction	K04849;K04849;K04849;K04849;K04849;K04849;K04849;K04849;K04849;K04849;K04849;K04849	GO:0016020//membrane	GO:0005216//ion channel activity;GO:0005509//calcium ion binding	GO:0006811//ion transport;GO:0055085//transmembrane transport
miR-281-x	XM_026439326.1	806	827	-16.6	gTCTCTCGCAAGGGGGggaagg	x|||||||xx|||x:|xxxxxx	aAGAGAGCTATCCATCgacagt	CAC	XP_026295111.1 voltage-dependent calcium channel type A subunit alpha-1 isoform X19 [Apis mellifera]	Human Diseases;Environmental Information Processing;Environmental Information Processing;Organismal Systems;Organismal Systems;Organismal Systems;Organismal Systems;Human Diseases;Organismal Systems;Organismal Systems;Human Diseases;Human Diseases	Neurodegenerative diseases;Signal transduction;Signal transduction;Nervous system;Nervous system;Nervous system;Nervous system;Substance dependence;Nervous system;Nervous system;Endocrine and metabolic diseases;Substance dependence	ko05016//Huntington disease;ko04010//MAPK signaling pathway;ko04020//Calcium signaling pathway;ko04728//Dopaminergic synapse;ko04721//Synaptic vesicle cycle;ko04725//Cholinergic synapse;ko04723//Retrograde endocannabinoid signaling;ko05032//Morphine addiction;ko04726//Serotonergic synapse;ko04727//GABAergic synapse;ko04930//Type II diabetes mellitus;ko05033//Nicotine addiction	K04849;K04849;K04849;K04849;K04849;K04849;K04849;K04849;K04849;K04849;K04849;K04849	GO:0016020//membrane	GO:0005216//ion channel activity;GO:0005509//calcium ion binding	GO:0006811//ion transport;GO:0055085//transmembrane transport
miR-281-x	XM_026439327.1	806	827	-16.6	gTCTCTCGCAAGGGGGggaagg	x|||||||xx|||x:|xxxxxx	aAGAGAGCTATCCATCgacagt	CAC	XP_026295112.1 voltage-dependent calcium channel type A subunit alpha-1 isoform X21 [Apis mellifera]	Human Diseases;Environmental Information Processing;Environmental Information Processing;Organismal Systems;Organismal Systems;Organismal Systems;Organismal Systems;Human Diseases;Organismal Systems;Organismal Systems;Human Diseases;Human Diseases	Neurodegenerative diseases;Signal transduction;Signal transduction;Nervous system;Nervous system;Nervous system;Nervous system;Substance dependence;Nervous system;Nervous system;Endocrine and metabolic diseases;Substance dependence	ko05016//Huntington disease;ko04010//MAPK signaling pathway;ko04020//Calcium signaling pathway;ko04728//Dopaminergic synapse;ko04721//Synaptic vesicle cycle;ko04725//Cholinergic synapse;ko04723//Retrograde endocannabinoid signaling;ko05032//Morphine addiction;ko04726//Serotonergic synapse;ko04727//GABAergic synapse;ko04930//Type II diabetes mellitus;ko05033//Nicotine addiction	K04849;K04849;K04849;K04849;K04849;K04849;K04849;K04849;K04849;K04849;K04849;K04849	GO:0016020//membrane	GO:0005216//ion channel activity;GO:0005509//calcium ion binding	GO:0006811//ion transport;GO:0055085//transmembrane transport
miR-281-x	XM_026439328.1	806	827	-16.6	gTCTCTCGCAAGGGGGggaagg	x|||||||xx|||x:|xxxxxx	aAGAGAGCTATCCATCgacagt	CAC	XP_026295113.1 voltage-dependent calcium channel type A subunit alpha-1 isoform X22 [Apis mellifera]	Human Diseases;Environmental Information Processing;Environmental Information Processing;Organismal Systems;Organismal Systems;Organismal Systems;Organismal Systems;Human Diseases;Organismal Systems;Organismal Systems;Human Diseases;Human Diseases	Neurodegenerative diseases;Signal transduction;Signal transduction;Nervous system;Nervous system;Nervous system;Nervous system;Substance dependence;Nervous system;Nervous system;Endocrine and metabolic diseases;Substance dependence	ko05016//Huntington disease;ko04010//MAPK signaling pathway;ko04020//Calcium signaling pathway;ko04728//Dopaminergic synapse;ko04721//Synaptic vesicle cycle;ko04725//Cholinergic synapse;ko04723//Retrograde endocannabinoid signaling;ko05032//Morphine addiction;ko04726//Serotonergic synapse;ko04727//GABAergic synapse;ko04930//Type II diabetes mellitus;ko05033//Nicotine addiction	K04849;K04849;K04849;K04849;K04849;K04849;K04849;K04849;K04849;K04849;K04849;K04849	GO:0016020//membrane	GO:0005216//ion channel activity;GO:0005509//calcium ion binding	GO:0006811//ion transport;GO:0055085//transmembrane transport
miR-281-x	XM_026439329.1	806	827	-16.6	gTCTCTCGCAAGGGGGggaagg	x|||||||xx|||x:|xxxxxx	aAGAGAGCTATCCATCgacagt	CAC	XP_026295114.1 voltage-dependent calcium channel type A subunit alpha-1 isoform X23 [Apis mellifera]	Human Diseases;Environmental Information Processing;Environmental Information Processing;Organismal Systems;Organismal Systems;Organismal Systems;Organismal Systems;Human Diseases;Organismal Systems;Organismal Systems;Human Diseases;Human Diseases	Neurodegenerative diseases;Signal transduction;Signal transduction;Nervous system;Nervous system;Nervous system;Nervous system;Substance dependence;Nervous system;Nervous system;Endocrine and metabolic diseases;Substance dependence	ko05016//Huntington disease;ko04010//MAPK signaling pathway;ko04020//Calcium signaling pathway;ko04728//Dopaminergic synapse;ko04721//Synaptic vesicle cycle;ko04725//Cholinergic synapse;ko04723//Retrograde endocannabinoid signaling;ko05032//Morphine addiction;ko04726//Serotonergic synapse;ko04727//GABAergic synapse;ko04930//Type II diabetes mellitus;ko05033//Nicotine addiction	K04849;K04849;K04849;K04849;K04849;K04849;K04849;K04849;K04849;K04849;K04849;K04849	GO:0016020//membrane	GO:0005216//ion channel activity;GO:0005509//calcium ion binding	GO:0006811//ion transport;GO:0055085//transmembrane transport
miR-281-x	XM_026439331.1	806	827	-16.6	gTCTCTCGCAAGGGGGggaagg	x|||||||xx|||x:|xxxxxx	aAGAGAGCTATCCATCgacagt	CAC	XP_026295116.1 voltage-dependent calcium channel type A subunit alpha-1 isoform X25 [Apis mellifera]	Human Diseases;Environmental Information Processing;Environmental Information Processing;Organismal Systems;Organismal Systems;Organismal Systems;Organismal Systems;Human Diseases;Organismal Systems;Organismal Systems;Human Diseases;Human Diseases	Neurodegenerative diseases;Signal transduction;Signal transduction;Nervous system;Nervous system;Nervous system;Nervous system;Substance dependence;Nervous system;Nervous system;Endocrine and metabolic diseases;Substance dependence	ko05016//Huntington disease;ko04010//MAPK signaling pathway;ko04020//Calcium signaling pathway;ko04728//Dopaminergic synapse;ko04721//Synaptic vesicle cycle;ko04725//Cholinergic synapse;ko04723//Retrograde endocannabinoid signaling;ko05032//Morphine addiction;ko04726//Serotonergic synapse;ko04727//GABAergic synapse;ko04930//Type II diabetes mellitus;ko05033//Nicotine addiction	K04849;K04849;K04849;K04849;K04849;K04849;K04849;K04849;K04849;K04849;K04849;K04849	GO:0016020//membrane	GO:0005216//ion channel activity;GO:0005509//calcium ion binding	GO:0006811//ion transport;GO:0055085//transmembrane transport
miR-281-x	XM_026439332.1	806	827	-16.6	gTCTCTCGCAAGGGGGggaagg	x|||||||xx|||x:|xxxxxx	aAGAGAGCTATCCATCgacagt	CAC	XP_026295117.1 voltage-dependent calcium channel type A subunit alpha-1 isoform X26 [Apis mellifera]	Human Diseases;Environmental Information Processing;Environmental Information Processing;Organismal Systems;Organismal Systems;Organismal Systems;Organismal Systems;Human Diseases;Organismal Systems;Organismal Systems;Human Diseases;Human Diseases	Neurodegenerative diseases;Signal transduction;Signal transduction;Nervous system;Nervous system;Nervous system;Nervous system;Substance dependence;Nervous system;Nervous system;Endocrine and metabolic diseases;Substance dependence	ko05016//Huntington disease;ko04010//MAPK signaling pathway;ko04020//Calcium signaling pathway;ko04728//Dopaminergic synapse;ko04721//Synaptic vesicle cycle;ko04725//Cholinergic synapse;ko04723//Retrograde endocannabinoid signaling;ko05032//Morphine addiction;ko04726//Serotonergic synapse;ko04727//GABAergic synapse;ko04930//Type II diabetes mellitus;ko05033//Nicotine addiction	K04849;K04849;K04849;K04849;K04849;K04849;K04849;K04849;K04849;K04849;K04849;K04849	GO:0016020//membrane	GO:0005216//ion channel activity;GO:0005509//calcium ion binding	GO:0006811//ion transport;GO:0055085//transmembrane transport
miR-281-x	XM_026439333.1	806	827	-16.6	gTCTCTCGCAAGGGGGggaagg	x|||||||xx|||x:|xxxxxx	aAGAGAGCTATCCATCgacagt	CAC	XP_026295118.1 voltage-dependent calcium channel type A subunit alpha-1 isoform X27 [Apis mellifera]	Human Diseases;Environmental Information Processing;Environmental Information Processing;Organismal Systems;Organismal Systems;Organismal Systems;Organismal Systems;Human Diseases;Organismal Systems;Organismal Systems;Human Diseases;Human Diseases	Neurodegenerative diseases;Signal transduction;Signal transduction;Nervous system;Nervous system;Nervous system;Nervous system;Substance dependence;Nervous system;Nervous system;Endocrine and metabolic diseases;Substance dependence	ko05016//Huntington disease;ko04010//MAPK signaling pathway;ko04020//Calcium signaling pathway;ko04728//Dopaminergic synapse;ko04721//Synaptic vesicle cycle;ko04725//Cholinergic synapse;ko04723//Retrograde endocannabinoid signaling;ko05032//Morphine addiction;ko04726//Serotonergic synapse;ko04727//GABAergic synapse;ko04930//Type II diabetes mellitus;ko05033//Nicotine addiction	K04849;K04849;K04849;K04849;K04849;K04849;K04849;K04849;K04849;K04849;K04849;K04849	GO:0016020//membrane	GO:0005216//ion channel activity;GO:0005509//calcium ion binding	GO:0006811//ion transport;GO:0055085//transmembrane transport
miR-281-x	XM_026439335.1	806	827	-16.6	gTCTCTCGCAAGGGGGggaagg	x|||||||xx|||x:|xxxxxx	aAGAGAGCTATCCATCgacagt	CAC	XP_026295120.1 voltage-dependent calcium channel type A subunit alpha-1 isoform X30 [Apis mellifera]	Human Diseases;Environmental Information Processing;Environmental Information Processing;Organismal Systems;Organismal Systems;Organismal Systems;Organismal Systems;Human Diseases;Organismal Systems;Organismal Systems;Human Diseases;Human Diseases	Neurodegenerative diseases;Signal transduction;Signal transduction;Nervous system;Nervous system;Nervous system;Nervous system;Substance dependence;Nervous system;Nervous system;Endocrine and metabolic diseases;Substance dependence	ko05016//Huntington disease;ko04010//MAPK signaling pathway;ko04020//Calcium signaling pathway;ko04728//Dopaminergic synapse;ko04721//Synaptic vesicle cycle;ko04725//Cholinergic synapse;ko04723//Retrograde endocannabinoid signaling;ko05032//Morphine addiction;ko04726//Serotonergic synapse;ko04727//GABAergic synapse;ko04930//Type II diabetes mellitus;ko05033//Nicotine addiction	K04849;K04849;K04849;K04849;K04849;K04849;K04849;K04849;K04849;K04849;K04849;K04849	GO:0016020//membrane	GO:0005216//ion channel activity;GO:0005509//calcium ion binding	GO:0006811//ion transport;GO:0055085//transmembrane transport
miR-281-x	XM_026439336.1	806	827	-16.6	gTCTCTCGCAAGGGGGggaagg	x|||||||xx|||x:|xxxxxx	aAGAGAGCTATCCATCgacagt	CAC	XP_026295121.1 voltage-dependent calcium channel type A subunit alpha-1 isoform X31 [Apis mellifera]	Human Diseases;Environmental Information Processing;Environmental Information Processing;Organismal Systems;Organismal Systems;Organismal Systems;Organismal Systems;Human Diseases;Organismal Systems;Organismal Systems;Human Diseases;Human Diseases	Neurodegenerative diseases;Signal transduction;Signal transduction;Nervous system;Nervous system;Nervous system;Nervous system;Substance dependence;Nervous system;Nervous system;Endocrine and metabolic diseases;Substance dependence	ko05016//Huntington disease;ko04010//MAPK signaling pathway;ko04020//Calcium signaling pathway;ko04728//Dopaminergic synapse;ko04721//Synaptic vesicle cycle;ko04725//Cholinergic synapse;ko04723//Retrograde endocannabinoid signaling;ko05032//Morphine addiction;ko04726//Serotonergic synapse;ko04727//GABAergic synapse;ko04930//Type II diabetes mellitus;ko05033//Nicotine addiction	K04849;K04849;K04849;K04849;K04849;K04849;K04849;K04849;K04849;K04849;K04849;K04849	GO:0016020//membrane	GO:0005216//ion channel activity;GO:0005509//calcium ion binding	GO:0006811//ion transport;GO:0055085//transmembrane transport
miR-281-x	XM_026439596.1	4330	4350	-11.7	cTCTCTCG-TACCTTGTTtaca	x|||||||x||xx|x|:|xxxx	aAGAGAGCTATCCATCGAcagt	S6KL	XP_026295381.1 serine/threonine-protein kinase S6KL isoform X1 [Apis mellifera]	-	-	-	-	-	GO:0004672//protein kinase activity;GO:0005524//ATP binding;GO:0016709//oxidoreductase activity, acting on paired donors, with incorporation or reduction of molecular oxygen, NAD(P)H as one donor, and incorporation of one atom of oxygen	GO:0006468//protein phosphorylation;GO:0006744//ubiquinone biosynthetic process
miR-281-x	XM_026439597.1	4330	4350	-11.7	cTCTCTCG-TACCTTGTTtaca	x|||||||x||xx|x|:|xxxx	aAGAGAGCTATCCATCGAcagt	S6KL	XP_026295381.1 serine/threonine-protein kinase S6KL isoform X1 [Apis mellifera]	-	-	-	-	-	GO:0004672//protein kinase activity;GO:0005524//ATP binding;GO:0016709//oxidoreductase activity, acting on paired donors, with incorporation or reduction of molecular oxygen, NAD(P)H as one donor, and incorporation of one atom of oxygen	GO:0006468//protein phosphorylation;GO:0006744//ubiquinone biosynthetic process
miR-281-x	XM_026439598.1	4330	4350	-11.7	cTCTCTCG-TACCTTGTTtaca	x|||||||x||xx|x|:|xxxx	aAGAGAGCTATCCATCGAcagt	S6KL	XP_026295383.1 serine/threonine-protein kinase S6KL isoform X2 [Apis mellifera]	-	-	-	-	-	GO:0004672//protein kinase activity;GO:0005524//ATP binding	GO:0006468//protein phosphorylation
miR-281-x	XM_026439599.1	4330	4350	-11.7	cTCTCTCG-TACCTTGTTtaca	x|||||||x||xx|x|:|xxxx	aAGAGAGCTATCCATCGAcagt	S6KL	XP_026295384.1 serine/threonine-protein kinase S6KL isoform X3 [Apis mellifera]	-	-	-	-	-	GO:0004672//protein kinase activity;GO:0005524//ATP binding;GO:0016709//oxidoreductase activity, acting on paired donors, with incorporation or reduction of molecular oxygen, NAD(P)H as one donor, and incorporation of one atom of oxygen	GO:0006468//protein phosphorylation;GO:0006744//ubiquinone biosynthetic process
miR-281-x	XM_026439600.1	4330	4350	-11.7	cTCTCTCG-TACCTTGTTtaca	x|||||||x||xx|x|:|xxxx	aAGAGAGCTATCCATCGAcagt	S6KL	XP_026295384.1 serine/threonine-protein kinase S6KL isoform X3 [Apis mellifera]	-	-	-	-	-	GO:0004672//protein kinase activity;GO:0005524//ATP binding;GO:0016709//oxidoreductase activity, acting on paired donors, with incorporation or reduction of molecular oxygen, NAD(P)H as one donor, and incorporation of one atom of oxygen	GO:0006468//protein phosphorylation;GO:0006744//ubiquinone biosynthetic process
miR-281-x	XM_026439807.1	256	277	-14.13	cTCTCTCGcacaacaagtgcgc	x|||||||xxxxxxxxxxxxxx	aAGAGAGCtatccatcgacagt	NME8	XP_026295592.1 uncharacterized protein LOC725664 [Apis mellifera]	-	-	-	-	GO:0005737//cytoplasm	GO:0003756//protein disulfide isomerase activity;GO:0015036//disulfide oxidoreductase activity	GO:0006457//protein folding;GO:0055114//oxidation-reduction process
miR-281-x	XM_026439808.1	1166	1187	-14.13	cTCTCTCGcacaacaagtgcgc	x|||||||xxxxxxxxxxxxxx	aAGAGAGCtatccatcgacagt	NME8	XP_026295592.1 uncharacterized protein LOC725664 [Apis mellifera]	-	-	-	-	GO:0005737//cytoplasm	GO:0003756//protein disulfide isomerase activity;GO:0015036//disulfide oxidoreductase activity	GO:0006457//protein folding;GO:0055114//oxidation-reduction process
miR-281-x	XM_026439827.1	1954	1976	-10.77	aTCTCTCGCATAcatctatacat	x|||||||x|||xxxxxxxxxxx	aAGAGAGC-TATccatcgacagt	Hs3st5	XP_006569299.1 heparan sulfate glucosamine 3-O-sulfotransferase 1 isoform X2 [Apis mellifera]	Metabolism	Glycan biosynthesis and metabolism	ko00534//Glycosaminoglycan biosynthesis - heparan sulfate / heparin	K08104	GO:0000124//SAGA complex;GO:0016021//integral component of membrane	GO:0003712//transcription cofactor activity;GO:0008146//sulfotransferase activity	-
miR-281-x	XM_026439828.1	388	407	-19.4	tTCTCTCGTTAG--AGCCGTtc	x|||||||x|||xx|||x||xx	aAGAGAGCTATCCATCGACAgt	--	XP_026295613.1 uncharacterized protein LOC725829 isoform X1 [Apis mellifera]	-	-	-	-	-	GO:0000166//nucleotide binding;GO:0004812//aminoacyl-tRNA ligase activity;GO:0005524//ATP binding	GO:0006418//tRNA aminoacylation for protein translation
miR-281-x	XM_026439830.1	388	407	-19.4	tTCTCTCGTTAG--AGCCGTtc	x|||||||x|||xx|||x||xx	aAGAGAGCTATCCATCGACAgt	--	XP_026295615.1 uncharacterized protein LOC725829 isoform X2 [Apis mellifera]	-	-	-	-	GO:0005634//nucleus	GO:0000166//nucleotide binding;GO:0004812//aminoacyl-tRNA ligase activity;GO:0005524//ATP binding	GO:0006418//tRNA aminoacylation for protein translation;GO:0051382//kinetochore assembly
miR-281-x	XM_026439831.1	388	407	-19.4	tTCTCTCGTTAG--AGCCGTtc	x|||||||x|||xx|||x||xx	aAGAGAGCTATCCATCGACAgt	--	XP_026295616.1 uncharacterized protein LOC725829 isoform X3 [Apis mellifera]	-	-	-	-	GO:0005634//nucleus	GO:0000166//nucleotide binding;GO:0004812//aminoacyl-tRNA ligase activity;GO:0005524//ATP binding	GO:0006418//tRNA aminoacylation for protein translation;GO:0051382//kinetochore assembly
miR-281-x	XM_026439832.1	388	407	-19.4	tTCTCTCGTTAG--AGCCGTtc	x|||||||x|||xx|||x||xx	aAGAGAGCTATCCATCGACAgt	--	XP_026295617.1 uncharacterized protein LOC725829 isoform X4 [Apis mellifera]	-	-	-	-	GO:0005634//nucleus	GO:0000166//nucleotide binding;GO:0004812//aminoacyl-tRNA ligase activity;GO:0005524//ATP binding	GO:0006418//tRNA aminoacylation for protein translation;GO:0051382//kinetochore assembly
miR-281-x	XM_026439833.1	388	407	-19.4	tTCTCTCGTTAG--AGCCGTtc	x|||||||x|||xx|||x||xx	aAGAGAGCTATCCATCGACAgt	--	XP_026295617.1 uncharacterized protein LOC725829 isoform X4 [Apis mellifera]	-	-	-	-	GO:0005634//nucleus	GO:0000166//nucleotide binding;GO:0004812//aminoacyl-tRNA ligase activity;GO:0005524//ATP binding	GO:0006418//tRNA aminoacylation for protein translation;GO:0051382//kinetochore assembly
miR-281-x	XM_026440146.1	8087	8108	-10.15	gTCTCTCGTTAaaattaccggg	x|||||||x||xxxxxxxxxxx	aAGAGAGCTATccatcgacagt	bab2	XP_006562717.2 protein bric-a-brac 1-like isoform X1 [Apis mellifera]	-	-	-	-	GO:0005672//transcription factor TFIIA complex;GO:0030867//rough endoplasmic reticulum membrane	GO:0003729//mRNA binding;GO:0005515//protein binding	GO:0000398//mRNA splicing, via spliceosome;GO:0006367//transcription initiation from RNA polymerase II promoter;GO:0023041//neuronal signal transduction
miR-281-x	XM_026440148.1	8087	8108	-10.15	gTCTCTCGTTAaaattaccggg	x|||||||x||xxxxxxxxxxx	aAGAGAGCTATccatcgacagt	bab2	XP_006562717.2 protein bric-a-brac 1-like isoform X1 [Apis mellifera]	-	-	-	-	GO:0005672//transcription factor TFIIA complex;GO:0030867//rough endoplasmic reticulum membrane	GO:0003729//mRNA binding;GO:0005515//protein binding	GO:0000398//mRNA splicing, via spliceosome;GO:0006367//transcription initiation from RNA polymerase II promoter;GO:0023041//neuronal signal transduction
miR-281-x	XM_026440149.1	8087	8108	-10.15	gTCTCTCGTTAaaattaccggg	x|||||||x||xxxxxxxxxxx	aAGAGAGCTATccatcgacagt	bab2	XP_006562717.2 protein bric-a-brac 1-like isoform X1 [Apis mellifera]	-	-	-	-	GO:0005672//transcription factor TFIIA complex;GO:0030867//rough endoplasmic reticulum membrane	GO:0003729//mRNA binding;GO:0005515//protein binding	GO:0000398//mRNA splicing, via spliceosome;GO:0006367//transcription initiation from RNA polymerase II promoter;GO:0023041//neuronal signal transduction
miR-281-x	XM_026440150.1	8087	8108	-10.15	gTCTCTCGTTAaaattaccggg	x|||||||x||xxxxxxxxxxx	aAGAGAGCTATccatcgacagt	bab2	XP_006562717.2 protein bric-a-brac 1-like isoform X1 [Apis mellifera]	-	-	-	-	GO:0005672//transcription factor TFIIA complex;GO:0030867//rough endoplasmic reticulum membrane	GO:0003729//mRNA binding;GO:0005515//protein binding	GO:0000398//mRNA splicing, via spliceosome;GO:0006367//transcription initiation from RNA polymerase II promoter;GO:0023041//neuronal signal transduction
miR-281-x	XM_026440151.1	8087	8108	-10.15	gTCTCTCGTTAaaattaccggg	x|||||||x||xxxxxxxxxxx	aAGAGAGCTATccatcgacagt	bab2	XP_006562717.2 protein bric-a-brac 1-like isoform X1 [Apis mellifera]	-	-	-	-	GO:0005672//transcription factor TFIIA complex;GO:0030867//rough endoplasmic reticulum membrane	GO:0003729//mRNA binding;GO:0005515//protein binding	GO:0000398//mRNA splicing, via spliceosome;GO:0006367//transcription initiation from RNA polymerase II promoter;GO:0023041//neuronal signal transduction
miR-281-x	XM_026440152.1	600	621	-16.2	cTCTCTCGtccttgctatcgcc	x|||||||xxxxxxxxxxxxxx	aAGAGAGCtatccatcgacagt	bab2	XP_026295937.1 zinc finger protein 628-like isoform X2 [Apis mellifera]	-	-	-	-	GO:0000124//SAGA complex;GO:0016021//integral component of membrane;GO:0030867//rough endoplasmic reticulum membrane	GO:0003677//DNA binding;GO:0003712//transcription cofactor activity;GO:0003729//mRNA binding;GO:0004190//aspartic-type endopeptidase activity;GO:0005515//protein binding;GO:0008270//zinc ion binding;GO:0046983//protein dimerization activity	GO:0000398//mRNA splicing, via spliceosome;GO:0006270//DNA replication initiation;GO:0006811//ion transport;GO:0016485//protein processing;GO:0023041//neuronal signal transduction
miR-281-x	XM_026440270.1	1613	1634	-13.13	cTCTCTCGTTTGCTCTTTGagc	x|||||||x|x|x|xx:||xxx	aAGAGAGCTATCCATCGACagt	SLC6A17	XP_026296055.1 sodium- and chloride-dependent transporter XTRP3 isoform X1 [Apis mellifera]	-	-	-	-	GO:0016021//integral component of membrane	-	-
miR-281-x	XM_026440359.1	473	498	-19.3	cTCTCTCGATATAAGATATGTTGcga	x||||||||||xxx|x||x|:||xxx	aAGAGAGCTAT---CCAT-CGACagt	Slc17a5	XP_026296144.1 sialin-like isoform X1 [Apis mellifera]	-	-	-	-	-	GO:0022857//transmembrane transporter activity	GO:0055085//transmembrane transport
miR-281-x	XM_026440401.1	1741	1764	-25.28	tTCTCTCGGTGCGGTGAGCTCTgc	x|||||||:|:x|||x||||x|xx	aAGAGAGCTAT-CCA-TCGACAgt	--	XP_026296186.1 uncharacterized protein LOC100577798 isoform X3 [Apis mellifera]	-	-	-	-	-	-	-
miR-281-x	XM_026440545.1	250	270	-18.97	gTCTCTCGC-AGGTGcgagagg	x|||||||xx||||:xxxxxxx	aAGAGAGCTATCCATcgacagt	ARA1	XP_026296330.1 nicotinic acetylcholine receptor alpha3 subunit isoform X5 [Apis mellifera]	-	-	-	-	GO:0016021//integral component of membrane	GO:0005230//extracellular ligand-gated ion channel activity	GO:0006811//ion transport
miR-281-x	XM_026440849.1	34	55	-13.86	gTCTCTCGAAAGATAACataaa	x||||||||x||x||x|xxxxx	aAGAGAGCTATCCATCGacagt	--	XP_026296634.1 ankyrin repeat and ELMO domain-containing protein D isoform X2 [Apis mellifera]	-	-	-	-	GO:0005887//integral component of plasma membrane	GO:0042954//lipoprotein transporter activity	GO:0042953//lipoprotein transport
miR-281-x	XM_026440937.1	1423	1444	-13.71	tTCTCTCGGTtccttatttctt	x|||||||:|xxxxxxxxxxxx	aAGAGAGCTAtccatcgacagt	--	XP_026296722.1 uncharacterized protein LOC100578665 [Apis mellifera]	-	-	-	-	-	-	-
miR-281-x	XM_026440938.1	1423	1444	-13.71	tTCTCTCGGTtccttatttctt	x|||||||:|xxxxxxxxxxxx	aAGAGAGCTAtccatcgacagt	--	XP_026296722.1 uncharacterized protein LOC100578665 [Apis mellifera]	-	-	-	-	-	-	-
miR-281-x	XM_026440939.1	1423	1444	-13.71	tTCTCTCGGTtccttatttctt	x|||||||:|xxxxxxxxxxxx	aAGAGAGCTAtccatcgacagt	--	XP_026296722.1 uncharacterized protein LOC100578665 [Apis mellifera]	-	-	-	-	-	-	-
miR-281-x	XM_026440940.1	1423	1444	-13.71	tTCTCTCGGTtccttatttctt	x|||||||:|xxxxxxxxxxxx	aAGAGAGCTAtccatcgacagt	--	XP_026296722.1 uncharacterized protein LOC100578665 [Apis mellifera]	-	-	-	-	-	-	-
miR-281-x	XM_026440941.1	1423	1444	-13.71	tTCTCTCGGTtccttatttctt	x|||||||:|xxxxxxxxxxxx	aAGAGAGCTAtccatcgacagt	--	XP_026296722.1 uncharacterized protein LOC100578665 [Apis mellifera]	-	-	-	-	-	-	-
miR-281-x	XM_026440942.1	1423	1444	-13.71	tTCTCTCGGTtccttatttctt	x|||||||:|xxxxxxxxxxxx	aAGAGAGCTAtccatcgacagt	--	XP_026296722.1 uncharacterized protein LOC100578665 [Apis mellifera]	-	-	-	-	-	-	-
miR-281-x	XM_026440943.1	1423	1444	-13.71	tTCTCTCGGTtccttatttctt	x|||||||:|xxxxxxxxxxxx	aAGAGAGCTAtccatcgacagt	--	XP_026296722.1 uncharacterized protein LOC100578665 [Apis mellifera]	-	-	-	-	-	-	-
miR-281-x	XM_026441046.1	457	478	-12.65	cTCTCTCGTTTGCTcttttgca	x|||||||x|x|x|xxxxxxxx	aAGAGAGCTATCCAtcgacagt	Sox14	XP_026296831.1 probable serine/threonine-protein kinase DDB_G0272282 [Apis mellifera]	Human Diseases	Cancers	ko05206//MicroRNAs in cancer	K23581	GO:0030867//rough endoplasmic reticulum membrane	-	GO:0009847//spore germination;GO:0023041//neuronal signal transduction;GO:0030436//asexual sporulation
miR-281-x	XM_026441128.1	781	803	-19.98	tTCTCTCGATTTGGTcacgaagc	x|||||||||xx|||xxxxxxxx	aAGAGAGCTAT-CCAtcgacagt	trc	XP_026296913.1 serine/threonine-protein kinase tricorner isoform X9 [Apis mellifera]	-	-	-	-	-	GO:0004672//protein kinase activity;GO:0004674//protein serine/threonine kinase activity;GO:0005524//ATP binding;GO:0016709//oxidoreductase activity, acting on paired donors, with incorporation or reduction of molecular oxygen, NAD(P)H as one donor, and incorporation of one atom of oxygen	GO:0006468//protein phosphorylation;GO:0006744//ubiquinone biosynthetic process
miR-281-x	XM_026441165.1	610	631	-12.41	tTCTCTCGcaaattttcatagc	x|||||||xxxxxxxxxxxxxx	aAGAGAGCtatccatcgacagt	Adamts7	XP_026296950.1 A disintegrin and metalloproteinase with thrombospondin motifs 7 [Apis mellifera]	-	-	-	-	GO:0032040//small-subunit processome	GO:0004222//metalloendopeptidase activity	GO:0006508//proteolysis;GO:0007165//signal transduction
miR-281-x	XM_026441502.1	2180	2201	-12.1	cTCTCTCGCTAacctctctgct	x|||||||x||xxxxxxxxxxx	aAGAGAGCTATccatcgacagt	--	XP_026297287.1 transcription factor btd [Apis mellifera]	-	-	-	-	GO:0005634//nucleus;GO:0005737//cytoplasm	GO:0003723//RNA binding	GO:0006397//mRNA processing
miR-281-x	XM_026441518.1	291	315	-16.4	cTCTCTCGGCCGGCTCAAGTAGTag	x|||||||:xx||x|xx||:x||xx	aAGAGAGCTATCC-A--TCGACAgt	rg	XP_026297303.1 neurobeachin isoform X1 [Apis mellifera]	-	-	-	-	-	GO:0005515//protein binding	-
miR-281-x	XM_026441520.1	291	315	-16.4	cTCTCTCGGCCGGCTCAAGTAGTag	x|||||||:xx||x|xx||:x||xx	aAGAGAGCTATCC-A--TCGACAgt	rg	XP_026297305.1 neurobeachin isoform X2 [Apis mellifera]	-	-	-	-	-	GO:0005515//protein binding	-
miR-281-x	XM_026441521.1	291	315	-16.4	cTCTCTCGGCCGGCTCAAGTAGTag	x|||||||:xx||x|xx||:x||xx	aAGAGAGCTATCC-A--TCGACAgt	rg	XP_026297306.1 neurobeachin isoform X3 [Apis mellifera]	-	-	-	-	-	GO:0005515//protein binding	-
miR-281-x	XM_026441522.1	291	315	-16.4	cTCTCTCGGCCGGCTCAAGTAGTag	x|||||||:xx||x|xx||:x||xx	aAGAGAGCTATCC-A--TCGACAgt	rg	XP_026297307.1 neurobeachin isoform X4 [Apis mellifera]	-	-	-	-	-	GO:0005515//protein binding	-
miR-281-x	XM_026441523.1	291	315	-16.4	cTCTCTCGGCCGGCTCAAGTAGTag	x|||||||:xx||x|xx||:x||xx	aAGAGAGCTATCC-A--TCGACAgt	rg	XP_026297308.1 neurobeachin isoform X5 [Apis mellifera]	-	-	-	-	-	GO:0005515//protein binding	-
miR-281-x	XM_026441524.1	291	315	-16.4	cTCTCTCGGCCGGCTCAAGTAGTag	x|||||||:xx||x|xx||:x||xx	aAGAGAGCTATCC-A--TCGACAgt	rg	XP_026297309.1 neurobeachin isoform X6 [Apis mellifera]	-	-	-	-	-	GO:0005515//protein binding	-
miR-281-x	XM_026441525.1	291	315	-16.4	cTCTCTCGGCCGGCTCAAGTAGTag	x|||||||:xx||x|xx||:x||xx	aAGAGAGCTATCC-A--TCGACAgt	rg	XP_026297310.1 neurobeachin isoform X7 [Apis mellifera]	-	-	-	-	-	GO:0005515//protein binding	-
miR-281-x	XM_026441527.1	291	315	-16.4	cTCTCTCGGCCGGCTCAAGTAGTag	x|||||||:xx||x|xx||:x||xx	aAGAGAGCTATCC-A--TCGACAgt	rg	XP_026297312.1 neurobeachin isoform X9 [Apis mellifera]	-	-	-	-	-	GO:0005515//protein binding	-
miR-281-x	XM_026441528.1	291	315	-16.4	cTCTCTCGGCCGGCTCAAGTAGTag	x|||||||:xx||x|xx||:x||xx	aAGAGAGCTATCC-A--TCGACAgt	rg	XP_026297313.1 neurobeachin isoform X10 [Apis mellifera]	-	-	-	-	-	GO:0005515//protein binding	-
miR-281-x	XM_026441529.1	291	315	-16.4	cTCTCTCGGCCGGCTCAAGTAGTag	x|||||||:xx||x|xx||:x||xx	aAGAGAGCTATCC-A--TCGACAgt	rg	XP_026297314.1 neurobeachin isoform X11 [Apis mellifera]	-	-	-	-	-	GO:0005515//protein binding	-
miR-281-x	XM_026441530.1	291	315	-16.4	cTCTCTCGGCCGGCTCAAGTAGTag	x|||||||:xx||x|xx||:x||xx	aAGAGAGCTATCC-A--TCGACAgt	rg	XP_026297315.1 neurobeachin isoform X12 [Apis mellifera]	-	-	-	-	-	GO:0005515//protein binding	-
miR-281-x	XM_026441531.1	291	315	-16.4	cTCTCTCGGCCGGCTCAAGTAGTag	x|||||||:xx||x|xx||:x||xx	aAGAGAGCTATCC-A--TCGACAgt	rg	XP_026297316.1 neurobeachin isoform X13 [Apis mellifera]	-	-	-	-	-	GO:0005515//protein binding	-
miR-281-x	XM_026441532.1	291	315	-16.4	cTCTCTCGGCCGGCTCAAGTAGTag	x|||||||:xx||x|xx||:x||xx	aAGAGAGCTATCC-A--TCGACAgt	rg	XP_026297317.1 neurobeachin isoform X14 [Apis mellifera]	-	-	-	-	-	GO:0005515//protein binding	-
miR-281-x	XM_026441533.1	291	315	-16.4	cTCTCTCGGCCGGCTCAAGTAGTag	x|||||||:xx||x|xx||:x||xx	aAGAGAGCTATCC-A--TCGACAgt	rg	XP_026297318.1 neurobeachin isoform X15 [Apis mellifera]	-	-	-	-	-	GO:0005515//protein binding	-
miR-281-x	XM_026441534.1	291	315	-16.4	cTCTCTCGGCCGGCTCAAGTAGTag	x|||||||:xx||x|xx||:x||xx	aAGAGAGCTATCC-A--TCGACAgt	rg	XP_026297319.1 neurobeachin isoform X16 [Apis mellifera]	-	-	-	-	-	GO:0005515//protein binding	-
miR-281-x	XM_026441536.1	291	315	-16.4	cTCTCTCGGCCGGCTCAAGTAGTag	x|||||||:xx||x|xx||:x||xx	aAGAGAGCTATCC-A--TCGACAgt	rg	XP_026297321.1 neurobeachin isoform X17 [Apis mellifera]	-	-	-	-	-	GO:0005515//protein binding	-
miR-281-x	XM_026441541.1	1451	1472	-19.46	tTCTCTCGGAAGGGAAAAGTaa	x|||||||:x|||x|xxx||xx	aAGAGAGCTATCCATCGACAgt	Dyrk2	XP_026297326.1 probable serine/threonine-protein kinase dyrk2 isoform X1 [Apis mellifera]	-	-	-	-	-	GO:0004672//protein kinase activity;GO:0005524//ATP binding	GO:0006468//protein phosphorylation
miR-281-x	XM_026441542.1	1451	1472	-19.46	tTCTCTCGGAAGGGAAAAGTaa	x|||||||:x|||x|xxx||xx	aAGAGAGCTATCCATCGACAgt	Dyrk2	XP_026297326.1 probable serine/threonine-protein kinase dyrk2 isoform X1 [Apis mellifera]	-	-	-	-	-	GO:0004672//protein kinase activity;GO:0005524//ATP binding	GO:0006468//protein phosphorylation
miR-281-x	XM_026441544.1	1451	1472	-19.46	tTCTCTCGGAAGGGAAAAGTaa	x|||||||:x|||x|xxx||xx	aAGAGAGCTATCCATCGACAgt	Dyrk2	XP_026297329.1 probable serine/threonine-protein kinase dyrk2 isoform X3 [Apis mellifera]	-	-	-	-	-	GO:0004672//protein kinase activity;GO:0005524//ATP binding	GO:0006468//protein phosphorylation
miR-281-x	XM_026441618.1	11407	11428	-14.36	gTCTCTCGCTctccagagcgcg	x|||||||x|xxxxxxxxxxxx	aAGAGAGCTAtccatcgacagt	cpo	XP_006611187.1 protein couch potato-like isoform X3 [Apis dorsata]	-	-	-	-	-	GO:0003676//nucleic acid binding	GO:0008380//RNA splicing
miR-281-x	XM_026441619.1	11407	11428	-14.36	gTCTCTCGCTctccagagcgcg	x|||||||x|xxxxxxxxxxxx	aAGAGAGCTAtccatcgacagt	cpo	XP_006611190.1 protein couch potato-like isoform X6 [Apis dorsata]	-	-	-	-	-	GO:0003676//nucleic acid binding	GO:0008380//RNA splicing
miR-281-x	XM_026441620.1	11407	11428	-14.36	gTCTCTCGCTctccagagcgcg	x|||||||x|xxxxxxxxxxxx	aAGAGAGCTAtccatcgacagt	cpo	XP_006611191.1 protein couch potato-like isoform X8 [Apis dorsata]	-	-	-	-	-	GO:0003676//nucleic acid binding	GO:0008380//RNA splicing
miR-281-x	XM_026441761.1	776	797	-14.69	cTCTCTCGAAAtttttaagcaa	x||||||||x|xxxxxxxxxxx	aAGAGAGCTATccatcgacagt	CECR2	XP_026297546.1 mucin-5AC [Apis mellifera]	-	-	-	-	-	GO:0005515//protein binding	-
miR-281-x	XM_026441803.1	462	481	-18.64	aTCTCTCGAAAG--AGCTtctg	x||||||||x||xx||||xxxx	aAGAGAGCTATCCATCGAcagt	ZRANB2	XP_026297588.1 zinc finger Ran-binding domain-containing protein 2 [Apis mellifera]	-	-	-	-	-	-	-
miR-281-x	XM_026441868.1	1384	1403	-13.44	aTCTCTCGA--GCTATTTtcta	x||||||||xx|x||x:|xxxx	aAGAGAGCTATCCATCGAcagt	Pxd	XP_026297653.1 peroxidase isoform X1 [Apis mellifera]	-	-	-	-	-	-	-
miR-281-x	XM_026441869.1	1384	1403	-13.44	aTCTCTCGA--GCTATTTtcta	x||||||||xx|x||x:|xxxx	aAGAGAGCTATCCATCGAcagt	Pxd	XP_026297654.1 peroxidase isoform X2 [Apis mellifera]	-	-	-	-	-	-	-
miR-281-x	XM_026441870.1	1384	1403	-13.44	aTCTCTCGA--GCTATTTtcta	x||||||||xx|x||x:|xxxx	aAGAGAGCTATCCATCGAcagt	Pxd	XP_026297655.1 peroxidase isoform X3 [Apis mellifera]	-	-	-	-	-	-	-
miR-281-x	XM_026441871.1	1384	1403	-13.44	aTCTCTCGA--GCTATTTtcta	x||||||||xx|x||x:|xxxx	aAGAGAGCTATCCATCGAcagt	Pxd	XP_026297656.1 peroxidase isoform X4 [Apis mellifera]	-	-	-	-	-	-	-
miR-281-x	XM_026441872.1	1384	1403	-13.44	aTCTCTCGA--GCTATTTtcta	x||||||||xx|x||x:|xxxx	aAGAGAGCTATCCATCGAcagt	Pxd	XP_026297654.1 peroxidase isoform X2 [Apis mellifera]	-	-	-	-	-	-	-
miR-281-x	XM_026441873.1	1384	1403	-13.44	aTCTCTCGA--GCTATTTtcta	x||||||||xx|x||x:|xxxx	aAGAGAGCTATCCATCGAcagt	Pxd	XP_026297654.1 peroxidase isoform X2 [Apis mellifera]	-	-	-	-	-	-	-
miR-281-x	XM_026441874.1	1384	1403	-13.44	aTCTCTCGA--GCTATTTtcta	x||||||||xx|x||x:|xxxx	aAGAGAGCTATCCATCGAcagt	Pxd	XP_026297655.1 peroxidase isoform X3 [Apis mellifera]	-	-	-	-	-	-	-
miR-281-x	XM_026441923.1	1798	1821	-13.93	tTCTCTCGAACTTTGTAatatatt	x||||||||xx|xx|||xxxxxxx	aAGAGAGCT--ATCCATcgacagt	Glut1	XP_006618986.1 glucose transporter type 1 isoform X4 [Apis dorsata]	Human Diseases;Human Diseases;Organismal Systems;Organismal Systems;Organismal Systems;Environmental Information Processing;Human Diseases;Organismal Systems;Human Diseases;Human Diseases;Organismal Systems	Cancers;Infectious diseases;Endocrine system;Endocrine system;Endocrine system;Signal transduction;Endocrine and metabolic diseases;Digestive system;Cancers;Cancers;Endocrine system	ko05200//Pathways in cancer;ko05166//HTLV-I infection;ko04911//Insulin secretion;ko04919//Thyroid hormone signaling pathway;ko04922//Glucagon signaling pathway;ko04066//HIF-1 signaling pathway;ko04931//Insulin resistance;ko04976//Bile secretion;ko05211//Renal cell carcinoma;ko05230//Central carbon metabolism in cancer;ko04920//Adipocytokine signaling pathway	K07299;K07299;K07299;K07299;K07299;K07299;K07299;K07299;K07299;K07299;K07299	GO:0005887//integral component of plasma membrane;GO:0016021//integral component of membrane;GO:0019028//viral capsid;GO:0019031//viral envelope;GO:0039679//viral occlusion body	GO:0005198//structural molecule activity;GO:0008028//monocarboxylic acid transmembrane transporter activity;GO:0015295//solute:proton symporter activity;GO:0022857//transmembrane transporter activity;GO:0042910//xenobiotic transporter activity;GO:0051119//sugar transmembrane transporter activity;GO:0061630//ubiquitin protein ligase activity	GO:0006810//transport;GO:0008643//carbohydrate transport;GO:0015718//monocarboxylic acid transport;GO:0016567//protein ubiquitination;GO:0042908//xenobiotic transport;GO:0055085//transmembrane transport
miR-281-x	XM_026441925.1	1798	1821	-13.93	tTCTCTCGAACTTTGTAatatatt	x||||||||xx|xx|||xxxxxxx	aAGAGAGCT--ATCCATcgacagt	Glut1	XP_006618994.1 glucose transporter type 1 isoform X14 [Apis dorsata]	Human Diseases;Human Diseases;Organismal Systems;Organismal Systems;Organismal Systems;Environmental Information Processing;Human Diseases;Organismal Systems;Human Diseases;Human Diseases;Organismal Systems	Cancers;Infectious diseases;Endocrine system;Endocrine system;Endocrine system;Signal transduction;Endocrine and metabolic diseases;Digestive system;Cancers;Cancers;Endocrine system	ko05200//Pathways in cancer;ko05166//HTLV-I infection;ko04911//Insulin secretion;ko04919//Thyroid hormone signaling pathway;ko04922//Glucagon signaling pathway;ko04066//HIF-1 signaling pathway;ko04931//Insulin resistance;ko04976//Bile secretion;ko05211//Renal cell carcinoma;ko05230//Central carbon metabolism in cancer;ko04920//Adipocytokine signaling pathway	K07299;K07299;K07299;K07299;K07299;K07299;K07299;K07299;K07299;K07299;K07299	GO:0005887//integral component of plasma membrane;GO:0016021//integral component of membrane	GO:0008028//monocarboxylic acid transmembrane transporter activity;GO:0015295//solute:proton symporter activity;GO:0022857//transmembrane transporter activity;GO:0042910//xenobiotic transporter activity;GO:0051119//sugar transmembrane transporter activity	GO:0006810//transport;GO:0008643//carbohydrate transport;GO:0015718//monocarboxylic acid transport;GO:0042908//xenobiotic transport;GO:0055085//transmembrane transport
miR-281-x	XM_026441926.1	1798	1821	-13.93	tTCTCTCGAACTTTGTAatatatt	x||||||||xx|xx|||xxxxxxx	aAGAGAGCT--ATCCATcgacagt	Glut1	XP_006618994.1 glucose transporter type 1 isoform X14 [Apis dorsata]	Human Diseases;Human Diseases;Organismal Systems;Organismal Systems;Organismal Systems;Environmental Information Processing;Human Diseases;Organismal Systems;Human Diseases;Human Diseases;Organismal Systems	Cancers;Infectious diseases;Endocrine system;Endocrine system;Endocrine system;Signal transduction;Endocrine and metabolic diseases;Digestive system;Cancers;Cancers;Endocrine system	ko05200//Pathways in cancer;ko05166//HTLV-I infection;ko04911//Insulin secretion;ko04919//Thyroid hormone signaling pathway;ko04922//Glucagon signaling pathway;ko04066//HIF-1 signaling pathway;ko04931//Insulin resistance;ko04976//Bile secretion;ko05211//Renal cell carcinoma;ko05230//Central carbon metabolism in cancer;ko04920//Adipocytokine signaling pathway	K07299;K07299;K07299;K07299;K07299;K07299;K07299;K07299;K07299;K07299;K07299	GO:0005887//integral component of plasma membrane;GO:0016021//integral component of membrane	GO:0008028//monocarboxylic acid transmembrane transporter activity;GO:0015295//solute:proton symporter activity;GO:0022857//transmembrane transporter activity;GO:0042910//xenobiotic transporter activity;GO:0051119//sugar transmembrane transporter activity	GO:0006810//transport;GO:0008643//carbohydrate transport;GO:0015718//monocarboxylic acid transport;GO:0042908//xenobiotic transport;GO:0055085//transmembrane transport
miR-281-x	XM_026442089.1	609	628	-20.42	tTCTCTCG-TAGCTA-CTGTtt	x|||||||x|||x||x||||xx	aAGAGAGCTATCCATCGACAgt	AGAP005037	XP_026297874.1 uncharacterized protein LOC411277 isoform X6 [Apis mellifera]	-	-	-	-	-	-	-
miR-281-x	XM_026442182.1	817	838	-13.47	tTCTCTCGTTTGTTACTTTTtc	x|||||||x|x|x||x:|x|xx	aAGAGAGCTATCCATCGACAgt	trpl	XP_006562675.2 transient-receptor-potential-like protein [Apis mellifera]	Organismal Systems	Sensory system	ko04745//Phototransduction - fly	K13803	GO:0016020//membrane	GO:0005216//ion channel activity;GO:0005515//protein binding	GO:0006811//ion transport;GO:0055085//transmembrane transport
miR-281-x	XM_026442288.1	40	61	-13.3	aTCTCTCGccgcaaccgccgca	x|||||||xxxxxxxxxxxxxx	aAGAGAGCtatccatcgacagt	KCNIP1	XP_006617637.1 Kv channel-interacting protein 1 [Apis dorsata]	-	-	-	-	-	GO:0004553//hydrolase activity, hydrolyzing O-glycosyl compounds;GO:0005509//calcium ion binding;GO:0005515//protein binding	GO:0000272//polysaccharide catabolic process
miR-281-x	XM_026442353.1	936	957	-12.72	aTCTCTCGtcaactgaaggcca	x|||||||xxxxxxxxxxxxxx	aAGAGAGCtatccatcgacagt	sog	XP_006570092.1 dorsal-ventral patterning protein Sog isoform X4 [Apis mellifera]	Environmental Information Processing	Signal transduction	ko04350//TGF-beta signaling pathway	K04657	-	GO:0005515//protein binding	-
miR-281-x	XM_026442384.1	289	308	-14.61	aTCTCTCGATA--TACTTTTat	x||||||||||xx||x:|x|xx	aAGAGAGCTATCCATCGACAgt	ARHGEF10	XP_006570097.2 rho guanine nucleotide exchange factor 10-like protein isoform X2 [Apis mellifera]	-	-	-	-	-	GO:0005085//guanyl-nucleotide exchange factor activity;GO:0008705//methionine synthase activity	GO:0009086//methionine biosynthetic process
miR-281-x	XM_026442387.1	371	391	-18.31	tTCTCTCGAAAGAAA-TTGTta	x||||||||x||xx|x:|||xx	aAGAGAGCTATCCATCGACAgt	Hspg2	XP_026298172.1 basement membrane-specific heparan sulfate proteoglycan core protein isoform X1 [Apis mellifera]	-	-	-	-	-	GO:0005515//protein binding	-
miR-281-x	XM_026442388.1	371	391	-18.31	tTCTCTCGAAAGAAA-TTGTta	x||||||||x||xx|x:|||xx	aAGAGAGCTATCCATCGACAgt	Hspg2	XP_026298173.1 basement membrane-specific heparan sulfate proteoglycan core protein isoform X2 [Apis mellifera]	-	-	-	-	-	GO:0005515//protein binding	-
miR-281-x	XM_026442389.1	371	391	-18.31	tTCTCTCGAAAGAAA-TTGTta	x||||||||x||xx|x:|||xx	aAGAGAGCTATCCATCGACAgt	Hspg2	XP_026298174.1 basement membrane-specific heparan sulfate proteoglycan core protein isoform X3 [Apis mellifera]	-	-	-	-	-	GO:0005515//protein binding	-
miR-281-x	XM_026442390.1	371	391	-18.31	tTCTCTCGAAAGAAA-TTGTta	x||||||||x||xx|x:|||xx	aAGAGAGCTATCCATCGACAgt	Hspg2	XP_026298175.1 basement membrane-specific heparan sulfate proteoglycan core protein isoform X4 [Apis mellifera]	-	-	-	-	-	GO:0005515//protein binding	-
miR-281-x	XM_026442391.1	371	391	-18.31	tTCTCTCGAAAGAAA-TTGTta	x||||||||x||xx|x:|||xx	aAGAGAGCTATCCATCGACAgt	Hspg2	XP_026298176.1 basement membrane-specific heparan sulfate proteoglycan core protein isoform X5 [Apis mellifera]	-	-	-	-	-	GO:0005515//protein binding	-
miR-281-x	XM_026442392.1	371	391	-18.31	tTCTCTCGAAAGAAA-TTGTta	x||||||||x||xx|x:|||xx	aAGAGAGCTATCCATCGACAgt	Hspg2	XP_026298177.1 basement membrane-specific heparan sulfate proteoglycan core protein isoform X6 [Apis mellifera]	-	-	-	-	-	GO:0005515//protein binding	-
miR-281-x	XM_026442393.1	371	391	-18.31	tTCTCTCGAAAGAAA-TTGTta	x||||||||x||xx|x:|||xx	aAGAGAGCTATCCATCGACAgt	Hspg2	XP_026298178.1 basement membrane-specific heparan sulfate proteoglycan core protein isoform X7 [Apis mellifera]	-	-	-	-	-	GO:0005515//protein binding	-
miR-281-x	XM_026442394.1	371	391	-18.31	tTCTCTCGAAAGAAA-TTGTta	x||||||||x||xx|x:|||xx	aAGAGAGCTATCCATCGACAgt	Hspg2	XP_026298179.1 basement membrane-specific heparan sulfate proteoglycan core protein isoform X8 [Apis mellifera]	-	-	-	-	-	GO:0005515//protein binding	-
miR-281-x	XM_026442395.1	371	391	-18.31	tTCTCTCGAAAGAAA-TTGTta	x||||||||x||xx|x:|||xx	aAGAGAGCTATCCATCGACAgt	Hspg2	XP_026298180.1 basement membrane-specific heparan sulfate proteoglycan core protein isoform X9 [Apis mellifera]	-	-	-	-	-	GO:0005515//protein binding	-
miR-281-x	XM_026442396.1	371	391	-18.31	tTCTCTCGAAAGAAA-TTGTta	x||||||||x||xx|x:|||xx	aAGAGAGCTATCCATCGACAgt	Hspg2	XP_026298181.1 basement membrane-specific heparan sulfate proteoglycan core protein isoform X10 [Apis mellifera]	-	-	-	-	-	GO:0005515//protein binding	-
miR-281-x	XM_026442397.1	371	391	-18.31	tTCTCTCGAAAGAAA-TTGTta	x||||||||x||xx|x:|||xx	aAGAGAGCTATCCATCGACAgt	Hspg2	XP_026298182.1 basement membrane-specific heparan sulfate proteoglycan core protein isoform X11 [Apis mellifera]	-	-	-	-	-	GO:0005515//protein binding	-
miR-281-x	XM_026442398.1	371	391	-18.31	tTCTCTCGAAAGAAA-TTGTta	x||||||||x||xx|x:|||xx	aAGAGAGCTATCCATCGACAgt	Hspg2	XP_026298183.1 basement membrane-specific heparan sulfate proteoglycan core protein isoform X12 [Apis mellifera]	-	-	-	-	-	GO:0005515//protein binding	-
miR-281-x	XM_026442399.1	371	391	-18.31	tTCTCTCGAAAGAAA-TTGTta	x||||||||x||xx|x:|||xx	aAGAGAGCTATCCATCGACAgt	Hspg2	XP_026298184.1 basement membrane-specific heparan sulfate proteoglycan core protein isoform X13 [Apis mellifera]	-	-	-	-	-	GO:0005515//protein binding	-
miR-281-x	XM_026442400.1	371	391	-18.31	tTCTCTCGAAAGAAA-TTGTta	x||||||||x||xx|x:|||xx	aAGAGAGCTATCCATCGACAgt	Hspg2	XP_026298185.1 basement membrane-specific heparan sulfate proteoglycan core protein isoform X14 [Apis mellifera]	-	-	-	-	-	GO:0005515//protein binding	-
miR-281-x	XM_026442401.1	371	391	-18.31	tTCTCTCGAAAGAAA-TTGTta	x||||||||x||xx|x:|||xx	aAGAGAGCTATCCATCGACAgt	Hspg2	XP_026298186.1 basement membrane-specific heparan sulfate proteoglycan core protein isoform X15 [Apis mellifera]	-	-	-	-	-	GO:0005515//protein binding	-
miR-281-x	XM_026442402.1	371	391	-18.31	tTCTCTCGAAAGAAA-TTGTta	x||||||||x||xx|x:|||xx	aAGAGAGCTATCCATCGACAgt	Hspg2	XP_026298187.1 basement membrane-specific heparan sulfate proteoglycan core protein isoform X16 [Apis mellifera]	-	-	-	-	-	GO:0005515//protein binding	-
miR-281-x	XM_026442403.1	371	391	-18.31	tTCTCTCGAAAGAAA-TTGTta	x||||||||x||xx|x:|||xx	aAGAGAGCTATCCATCGACAgt	Hspg2	XP_026298188.1 basement membrane-specific heparan sulfate proteoglycan core protein isoform X17 [Apis mellifera]	-	-	-	-	-	GO:0005515//protein binding	-
miR-281-x	XM_026442404.1	371	391	-18.31	tTCTCTCGAAAGAAA-TTGTta	x||||||||x||xx|x:|||xx	aAGAGAGCTATCCATCGACAgt	Hspg2	XP_026298189.1 basement membrane-specific heparan sulfate proteoglycan core protein isoform X18 [Apis mellifera]	-	-	-	-	-	GO:0005515//protein binding	-
miR-281-x	XM_026442405.1	371	391	-18.31	tTCTCTCGAAAGAAA-TTGTta	x||||||||x||xx|x:|||xx	aAGAGAGCTATCCATCGACAgt	Hspg2	XP_026298190.1 basement membrane-specific heparan sulfate proteoglycan core protein isoform X19 [Apis mellifera]	-	-	-	-	-	GO:0005515//protein binding	-
miR-281-x	XM_026442406.1	371	391	-18.31	tTCTCTCGAAAGAAA-TTGTta	x||||||||x||xx|x:|||xx	aAGAGAGCTATCCATCGACAgt	Hspg2	XP_026298191.1 basement membrane-specific heparan sulfate proteoglycan core protein isoform X20 [Apis mellifera]	-	-	-	-	-	GO:0005515//protein binding	-
miR-281-x	XM_026442407.1	371	391	-18.31	tTCTCTCGAAAGAAA-TTGTta	x||||||||x||xx|x:|||xx	aAGAGAGCTATCCATCGACAgt	Hspg2	XP_026298192.1 basement membrane-specific heparan sulfate proteoglycan core protein isoform X21 [Apis mellifera]	-	-	-	-	-	GO:0005515//protein binding	-
miR-281-x	XM_026442408.1	371	391	-18.31	tTCTCTCGAAAGAAA-TTGTta	x||||||||x||xx|x:|||xx	aAGAGAGCTATCCATCGACAgt	Hspg2	XP_026298193.1 basement membrane-specific heparan sulfate proteoglycan core protein isoform X22 [Apis mellifera]	-	-	-	-	-	GO:0005515//protein binding	-
miR-281-x	XM_026442409.1	371	391	-18.31	tTCTCTCGAAAGAAA-TTGTta	x||||||||x||xx|x:|||xx	aAGAGAGCTATCCATCGACAgt	Hspg2	XP_026298194.1 basement membrane-specific heparan sulfate proteoglycan core protein isoform X23 [Apis mellifera]	-	-	-	-	-	GO:0005515//protein binding	-
miR-281-x	XM_026442410.1	371	391	-18.31	tTCTCTCGAAAGAAA-TTGTta	x||||||||x||xx|x:|||xx	aAGAGAGCTATCCATCGACAgt	Hspg2	XP_026298195.1 basement membrane-specific heparan sulfate proteoglycan core protein isoform X24 [Apis mellifera]	-	-	-	-	-	GO:0005515//protein binding	-
miR-281-x	XM_026442411.1	371	391	-18.31	tTCTCTCGAAAGAAA-TTGTta	x||||||||x||xx|x:|||xx	aAGAGAGCTATCCATCGACAgt	Hspg2	XP_026298196.1 basement membrane-specific heparan sulfate proteoglycan core protein isoform X25 [Apis mellifera]	-	-	-	-	-	GO:0005515//protein binding	-
miR-281-x	XM_026442412.1	371	391	-18.31	tTCTCTCGAAAGAAA-TTGTta	x||||||||x||xx|x:|||xx	aAGAGAGCTATCCATCGACAgt	Hspg2	XP_026298197.1 basement membrane-specific heparan sulfate proteoglycan core protein isoform X26 [Apis mellifera]	-	-	-	-	-	GO:0005515//protein binding	-
miR-281-x	XM_026442413.1	371	391	-18.31	tTCTCTCGAAAGAAA-TTGTta	x||||||||x||xx|x:|||xx	aAGAGAGCTATCCATCGACAgt	Hspg2	XP_026298198.1 basement membrane-specific heparan sulfate proteoglycan core protein isoform X27 [Apis mellifera]	-	-	-	-	-	GO:0005515//protein binding	-
miR-281-x	XM_026442414.1	371	391	-18.31	tTCTCTCGAAAGAAA-TTGTta	x||||||||x||xx|x:|||xx	aAGAGAGCTATCCATCGACAgt	Hspg2	XP_026298199.1 basement membrane-specific heparan sulfate proteoglycan core protein isoform X28 [Apis mellifera]	-	-	-	-	-	GO:0005515//protein binding	-
miR-281-x	XM_026442415.1	371	391	-18.31	tTCTCTCGAAAGAAA-TTGTta	x||||||||x||xx|x:|||xx	aAGAGAGCTATCCATCGACAgt	Hspg2	XP_026298199.1 basement membrane-specific heparan sulfate proteoglycan core protein isoform X28 [Apis mellifera]	-	-	-	-	-	GO:0005515//protein binding	-
miR-281-x	XM_026442416.1	371	391	-18.31	tTCTCTCGAAAGAAA-TTGTta	x||||||||x||xx|x:|||xx	aAGAGAGCTATCCATCGACAgt	Hspg2	XP_026298201.1 basement membrane-specific heparan sulfate proteoglycan core protein isoform X29 [Apis mellifera]	-	-	-	-	-	GO:0005515//protein binding	-
miR-281-x	XM_026442417.1	371	391	-18.31	tTCTCTCGAAAGAAA-TTGTta	x||||||||x||xx|x:|||xx	aAGAGAGCTATCCATCGACAgt	Hspg2	XP_026298202.1 basement membrane-specific heparan sulfate proteoglycan core protein isoform X30 [Apis mellifera]	-	-	-	-	-	GO:0005515//protein binding	-
miR-281-x	XM_026442418.1	371	391	-18.31	tTCTCTCGAAAGAAA-TTGTta	x||||||||x||xx|x:|||xx	aAGAGAGCTATCCATCGACAgt	Hspg2	XP_026298203.1 basement membrane-specific heparan sulfate proteoglycan core protein isoform X31 [Apis mellifera]	-	-	-	-	-	GO:0005515//protein binding	-
miR-281-x	XM_026442704.1	15	36	-14.35	gTCTCTCGCAAAGCGGGTGacc	x|||||||xx|x|x:|x||xxx	aAGAGAGCTATCCATCGACagt	--	XP_026298489.1 uncharacterized protein LOC113218982 [Apis mellifera]	-	-	-	-	-	-	-
miR-281-x	XM_026442829.1	639	659	-13.9	tTCTCTCGTTAAATAA-TGTgc	x|||||||x||xx||xx|||xx	aAGAGAGCTATCCATCGACAgt	NLGN4X	XP_026298614.1 uncharacterized protein LOC724358 isoform X2 [Apis mellifera]	Environmental Information Processing	Signaling molecules and interaction	ko04514//Cell adhesion molecules (CAMs)	K07378	-	GO:0016787//hydrolase activity	-
miR-281-x	XM_026443268.1	62	83	-11.4	tTCTCTCGTTtaacattaacaa	x|||||||x|xxxxxxxxxxxx	aAGAGAGCTAtccatcgacagt	FEZ2	XP_026299053.1 fasciculation and elongation protein zeta-2 isoform X2 [Apis mellifera]	-	-	-	-	-	-	-
miR-281-x	XM_026443337.1	63	82	-14.65	tTCTCTCGCT---TATCCTGTaa	x|||||||x|xxx||x|x|||xx	aAGAGAGCTATCCATCG-ACAgt	wdr5	XP_026299122.1 protein will die slowly [Apis mellifera]	Human Diseases	Endocrine and metabolic diseases	ko04934//Cushing syndrome	K14963	-	GO:0005515//protein binding	GO:0006355//regulation of transcription, DNA-templated
miR-281-x	XM_026443378.1	1189	1210	-11.09	cTCTCTCGTTCTCTCTCTCTtt	x|||||||x|xxx|xx||x|xx	aAGAGAGCTATCCATCGACAgt	FHL2	XP_026299163.1 uncharacterized protein LOC410211 isoform X1 [Apis mellifera]	-	-	-	-	-	GO:0008270//zinc ion binding	-
miR-281-x	XM_026443379.1	1189	1210	-11.09	cTCTCTCGTTCTCTCTCTCTtt	x|||||||x|xxx|xx||x|xx	aAGAGAGCTATCCATCGACAgt	FHL2	XP_026299164.1 testin isoform X4 [Apis mellifera]	-	-	-	-	-	GO:0008270//zinc ion binding	-
miR-281-x	XM_026443380.1	1189	1210	-11.09	cTCTCTCGTTCTCTCTCTCTtt	x|||||||x|xxx|xx||x|xx	aAGAGAGCTATCCATCGACAgt	FHL2	XP_026299165.1 testin isoform X6 [Apis mellifera]	-	-	-	-	-	GO:0008270//zinc ion binding	-
miR-281-x	XM_026443381.1	1189	1210	-11.09	cTCTCTCGTTCTCTCTCTCTtt	x|||||||x|xxx|xx||x|xx	aAGAGAGCTATCCATCGACAgt	FHL2	XP_026299166.1 four and a half LIM domains protein 2 isoform X8 [Apis mellifera]	-	-	-	-	-	GO:0008270//zinc ion binding	-
miR-281-x	XM_026443382.1	1189	1210	-11.09	cTCTCTCGTTCTCTCTCTCTtt	x|||||||x|xxx|xx||x|xx	aAGAGAGCTATCCATCGACAgt	FHL2	XP_026299167.1 four and a half LIM domains protein 2 isoform X10 [Apis mellifera]	-	-	-	-	-	GO:0008270//zinc ion binding	-
miR-281-x	XM_026443383.1	1189	1210	-11.09	cTCTCTCGTTCTCTCTCTCTtt	x|||||||x|xxx|xx||x|xx	aAGAGAGCTATCCATCGACAgt	FHL2	XP_026299168.1 four and a half LIM domains protein 2 isoform X11 [Apis mellifera]	-	-	-	-	-	GO:0008270//zinc ion binding	-
miR-281-x	XM_026443384.1	1189	1210	-11.09	cTCTCTCGTTCTCTCTCTCTtt	x|||||||x|xxx|xx||x|xx	aAGAGAGCTATCCATCGACAgt	FHL2	XP_026299168.1 four and a half LIM domains protein 2 isoform X11 [Apis mellifera]	-	-	-	-	-	-	-
miR-281-x	XM_026443393.1	367	387	-12.86	cTCTCTCG-TCGCGCGTTTTtt	x|||||||x|x|xxx|:|x|xx	aAGAGAGCTATCCATCGACAgt	--	XP_006566265.2 protein windpipe [Apis mellifera]	-	-	-	-	-	GO:0005515//protein binding	-
miR-281-x	XM_026443566.1	1915	1935	-13.79	aTCTCTCG-TAACCATATGTta	x|||||||x||xxx|xx|||xx	aAGAGAGCTATCCATCGACAgt	WNT-1	XP_026299351.1 protein Wnt-1 isoform X4 [Apis mellifera]	Human Diseases;Human Diseases;Human Diseases;Environmental Information Processing;Human Diseases;Human Diseases;Organismal Systems;Environmental Information Processing;Organismal Systems;Environmental Information Processing;Human Diseases;Organismal Systems;Cellular Processes;Human Diseases;Human Diseases;Human Diseases	Cancers;Neurodegenerative diseases;Infectious diseases;Signal transduction;Endocrine and metabolic diseases;Cancers;Development;Signal transduction;Endocrine system;Signal transduction;Cancers;Endocrine system;Cellular community - eukaryotes;Cancers;Cancers;Cancers	ko05200//Pathways in cancer;ko05010//Alzheimer disease;ko05165//Human papillomavirus infection;ko04310//Wnt signaling pathway;ko04934//Cushing syndrome;ko05205//Proteoglycans in cancer;ko04360//Axon guidance;ko04390//Hippo signaling pathway;ko04919//Thyroid hormone signaling pathway;ko04150//mTOR signaling pathway;ko05225//Hepatocellular carcinoma;ko04916//Melanogenesis;ko04550//Signaling pathway…	K00408;K00408;K00408;K00408;K00408;K00408;K00408;K00408;K00408;K00408;K00408;K00408;K00408;K00408;K00408;K00408	GO:0005576//extracellular region	GO:0005102//receptor binding	GO:0007275//multicellular organism development;GO:0016055//Wnt signaling pathway
miR-281-x	XM_026443638.1	393	414	-11.14	cTCTCTCGTTttcacttttcaa	x|||||||x|xxxxxxxxxxxx	aAGAGAGCTAtccatcgacagt	Dpp6	XP_016770208.1 dipeptidyl aminopeptidase-like protein 6 isoform X1 [Apis mellifera]	-	-	-	-	-	GO:0008236//serine-type peptidase activity;GO:0016787//hydrolase activity	GO:0006508//proteolysis
miR-281-x	XM_026443702.1	1216	1239	-18.57	tTCTCTCGTTTCTCTAAGCTGcct	x|||||||x|xxxx||x||||xxx	aAGAGAGCTATCC-AT-CGACagt	Pdk1	XP_026299487.1 3-phosphoinositide-dependent protein kinase 1 isoform X1 [Apis mellifera]	Human Diseases;Environmental Information Processing;Organismal Systems;Environmental Information Processing;Organismal Systems;Cellular Processes;Organismal Systems;Cellular Processes;Human Diseases;Environmental Information Processing;Environmental Information Processing;Human Diseases;Environmental Information Processing;Organismal Systems;Human Diseases;Human Diseases;Cellular Processes;Organi…	Cancers;Signal transduction;Endocrine system;Signal transduction;Endocrine system;Cellular community - eukaryotes;Nervous system;Transport and catabolism;Endocrine and metabolic diseases;Signal transduction;Signal transduction;Cancers;Signal transduction;Immune system;Cancers;Cancers;Cell growth and death;Endocrine system;Infectious diseases;Drug resistance;Cancers;Excretory system;Immune system	ko05205//Proteoglycans in cancer;ko04151//PI3K-Akt signaling pathway;ko04919//Thyroid hormone signaling pathway;ko04150//mTOR signaling pathway;ko04910//Insulin signaling pathway;ko04510//Focal adhesion;ko04722//Neurotrophin signaling pathway;ko04140//Autophagy - animal;ko04931//Insulin resistance;ko04152//AMPK signaling pathway;ko04068//FoxO signaling pathway;ko05231//Choline metabolism in cance…	K06276;K06276;K06276;K06276;K06276;K06276;K06276;K06276;K06276;K06276;K06276;K06276;K06276;K06276;K06276;K06276;K06276;K06276;K06276;K06276;K06276;K06276;K06276	GO:0000124//SAGA complex	GO:0003712//transcription cofactor activity;GO:0004672//protein kinase activity;GO:0005524//ATP binding	GO:0006468//protein phosphorylation
miR-281-x	XM_026443708.1	1384	1405	-15.13	cTCTCTCGTTAGcgaaaacgaa	x|||||||x|||xxxxxxxxxx	aAGAGAGCTATCcatcgacagt--	--	--	--	--	--	--	--	--	--
miR-281-x	XM_026443720.1	461	482	-14.42	cTCTCTCGtccttaaagcagaa	x|||||||xxxxxxxxxxxxxx	aAGAGAGCtatccatcgacagt	caup	XP_026299505.1 iroquois-class homeodomain protein IRX-6 isoform X3 [Apis mellifera]	-	-	-	-	-	GO:0003677//DNA binding	GO:0006355//regulation of transcription, DNA-templated
miR-281-x	XM_026443721.1	461	482	-14.42	cTCTCTCGtccttaaagcagaa	x|||||||xxxxxxxxxxxxxx	aAGAGAGCtatccatcgacagt	caup	XP_026299505.1 iroquois-class homeodomain protein IRX-6 isoform X3 [Apis mellifera]	-	-	-	-	-	GO:0003677//DNA binding	GO:0006355//regulation of transcription, DNA-templated
miR-281-x	XM_026443722.1	461	482	-14.42	cTCTCTCGtccttaaagcagaa	x|||||||xxxxxxxxxxxxxx	aAGAGAGCtatccatcgacagt	caup	XP_026299505.1 iroquois-class homeodomain protein IRX-6 isoform X3 [Apis mellifera]	-	-	-	-	-	GO:0003677//DNA binding	GO:0006355//regulation of transcription, DNA-templated
miR-281-x	XM_026444170.1	3568	3588	-13.9	aTCTCTCGGATA--TCGCTaatc	x|||||||x|||xx|x|||xxxx	aAGAGAGC-TATCCATCGAcagt	IGF2BP1	XP_003697415.1 insulin-like growth factor 2 mRNA-binding protein 1 isoform X1 [Apis florea]	Human Diseases	Cancers	ko05206//MicroRNAs in cancer	K17391	GO:0022627//cytosolic small ribosomal subunit	GO:0003676//nucleic acid binding;GO:0003723//RNA binding;GO:0003735//structural constituent of ribosome;GO:0004521//endoribonuclease activity;GO:0004654//polyribonucleotide nucleotidyltransferase activity	GO:0006353//DNA-templated transcription, termination;GO:0006402//mRNA catabolic process;GO:0006412//translation;GO:0008380//RNA splicing;GO:0030163//protein catabolic process
miR-281-x	XM_026444171.1	3568	3588	-13.9	aTCTCTCGGATA--TCGCTaatc	x|||||||x|||xx|x|||xxxx	aAGAGAGC-TATCCATCGAcagt	IGF2BP1	XP_026299956.1 insulin-like growth factor 2 mRNA-binding protein 1 isoform X2 [Apis mellifera]	Human Diseases	Cancers	ko05206//MicroRNAs in cancer	K17391	GO:0022627//cytosolic small ribosomal subunit	GO:0003676//nucleic acid binding;GO:0003723//RNA binding;GO:0003735//structural constituent of ribosome;GO:0004521//endoribonuclease activity;GO:0004654//polyribonucleotide nucleotidyltransferase activity	GO:0006353//DNA-templated transcription, termination;GO:0006402//mRNA catabolic process;GO:0006412//translation;GO:0008380//RNA splicing
miR-281-x	XM_026444172.1	3568	3588	-13.9	aTCTCTCGGATA--TCGCTaatc	x|||||||x|||xx|x|||xxxx	aAGAGAGC-TATCCATCGAcagt	IGF2BP1	XP_006610850.1 insulin-like growth factor 2 mRNA-binding protein 1 isoform X2 [Apis dorsata]	Human Diseases	Cancers	ko05206//MicroRNAs in cancer	K17391	GO:0022627//cytosolic small ribosomal subunit	GO:0003676//nucleic acid binding;GO:0003723//RNA binding;GO:0003735//structural constituent of ribosome;GO:0004521//endoribonuclease activity;GO:0004654//polyribonucleotide nucleotidyltransferase activity	GO:0006353//DNA-templated transcription, termination;GO:0006402//mRNA catabolic process;GO:0006412//translation;GO:0008380//RNA splicing
miR-281-x	XM_026444173.1	3568	3588	-13.9	aTCTCTCGGATA--TCGCTaatc	x|||||||x|||xx|x|||xxxx	aAGAGAGC-TATCCATCGAcagt	IGF2BP1	XP_026299958.1 insulin-like growth factor 2 mRNA-binding protein 1 isoform X4 [Apis mellifera]	Human Diseases	Cancers	ko05206//MicroRNAs in cancer	K17391	GO:0022627//cytosolic small ribosomal subunit	GO:0003676//nucleic acid binding;GO:0003723//RNA binding;GO:0003735//structural constituent of ribosome;GO:0004521//endoribonuclease activity;GO:0004654//polyribonucleotide nucleotidyltransferase activity	GO:0006353//DNA-templated transcription, termination;GO:0006402//mRNA catabolic process;GO:0006412//translation;GO:0008380//RNA splicing
miR-281-x	XM_026444488.1	363	383	-11.85	aTCTCTCG-TCGCTAaaaatgt	x|||||||x|x|x||xxxxxxx	aAGAGAGCTATCCATcgacagt--	--	--	--	--	--	--	--	--	--
miR-281-x	XM_026444529.1	1475	1495	-14.05	tTCTCTCG-TCGTTTGCccatg	x|||||||x|x|x|x||xxxxx	aAGAGAGCTATCCATCGacagt	FOXP1	XP_026300314.1 foxP protein isoform X1 [Apis mellifera]	-	-	-	-	-	GO:0003700//transcription factor activity, sequence-specific DNA binding;GO:0043565//sequence-specific DNA binding	GO:0006355//regulation of transcription, DNA-templated
miR-281-x	XM_026444530.1	1475	1495	-14.05	tTCTCTCG-TCGTTTGCccatg	x|||||||x|x|x|x||xxxxx	aAGAGAGCTATCCATCGacagt	FOXP4	XP_026300315.1 foxP protein isoform X2 [Apis mellifera]	-	-	-	-	-	GO:0003700//transcription factor activity, sequence-specific DNA binding;GO:0043565//sequence-specific DNA binding	GO:0006355//regulation of transcription, DNA-templated
miR-281-x	XM_026444531.1	1475	1495	-14.05	tTCTCTCG-TCGTTTGCccatg	x|||||||x|x|x|x||xxxxx	aAGAGAGCTATCCATCGacagt	FOXP4	XP_026300316.1 foxP protein isoform X3 [Apis mellifera]	-	-	-	-	-	GO:0003700//transcription factor activity, sequence-specific DNA binding;GO:0043565//sequence-specific DNA binding	GO:0006355//regulation of transcription, DNA-templated
miR-281-x	XM_026444532.1	1475	1495	-14.05	tTCTCTCG-TCGTTTGCccatg	x|||||||x|x|x|x||xxxxx	aAGAGAGCTATCCATCGacagt	FOXP1	XP_026300317.1 foxP protein isoform X4 [Apis mellifera]	-	-	-	-	-	GO:0003700//transcription factor activity, sequence-specific DNA binding;GO:0043565//sequence-specific DNA binding	GO:0006355//regulation of transcription, DNA-templated
miR-281-x	XM_026444533.1	1475	1495	-14.05	tTCTCTCG-TCGTTTGCccatg	x|||||||x|x|x|x||xxxxx	aAGAGAGCTATCCATCGacagt	FOXP4	XP_026300318.1 foxP protein isoform X5 [Apis mellifera]	-	-	-	-	-	GO:0003700//transcription factor activity, sequence-specific DNA binding;GO:0043565//sequence-specific DNA binding	GO:0006355//regulation of transcription, DNA-templated
miR-281-x	XM_026444534.1	1475	1495	-14.05	tTCTCTCG-TCGTTTGCccatg	x|||||||x|x|x|x||xxxxx	aAGAGAGCTATCCATCGacagt	FOXP1	XP_026300319.1 foxP protein isoform X6 [Apis mellifera]	-	-	-	-	-	GO:0003700//transcription factor activity, sequence-specific DNA binding;GO:0043565//sequence-specific DNA binding	GO:0006355//regulation of transcription, DNA-templated
miR-281-x	XM_026444536.1	1475	1495	-14.05	tTCTCTCG-TCGTTTGCccatg	x|||||||x|x|x|x||xxxxx	aAGAGAGCTATCCATCGacagt	FOXP1	XP_026300321.1 foxP protein isoform X7 [Apis mellifera]	-	-	-	-	-	GO:0003700//transcription factor activity, sequence-specific DNA binding;GO:0043565//sequence-specific DNA binding	GO:0006355//regulation of transcription, DNA-templated
miR-281-x	XM_026444537.1	1475	1495	-14.05	tTCTCTCG-TCGTTTGCccatg	x|||||||x|x|x|x||xxxxx	aAGAGAGCTATCCATCGacagt	FOXP1	XP_026300322.1 foxP protein isoform X8 [Apis mellifera]	-	-	-	-	-	GO:0003700//transcription factor activity, sequence-specific DNA binding;GO:0043565//sequence-specific DNA binding	GO:0006355//regulation of transcription, DNA-templated
miR-281-x	XM_026444538.1	1475	1495	-14.05	tTCTCTCG-TCGTTTGCccatg	x|||||||x|x|x|x||xxxxx	aAGAGAGCTATCCATCGacagt	FOXP1	XP_026300323.1 foxP protein isoform X9 [Apis mellifera]	-	-	-	-	-	GO:0003700//transcription factor activity, sequence-specific DNA binding;GO:0043565//sequence-specific DNA binding	GO:0006355//regulation of transcription, DNA-templated
miR-281-x	XM_026444539.1	1475	1495	-14.05	tTCTCTCG-TCGTTTGCccatg	x|||||||x|x|x|x||xxxxx	aAGAGAGCTATCCATCGacagt	FOXP1	XP_026300324.1 foxP protein isoform X10 [Apis mellifera]	-	-	-	-	-	GO:0003700//transcription factor activity, sequence-specific DNA binding;GO:0043565//sequence-specific DNA binding	GO:0006355//regulation of transcription, DNA-templated
miR-281-x	XM_026444540.1	1475	1495	-14.05	tTCTCTCG-TCGTTTGCccatg	x|||||||x|x|x|x||xxxxx	aAGAGAGCTATCCATCGacagt	FOXP1	XP_026300325.1 foxP protein isoform X11 [Apis mellifera]	-	-	-	-	-	GO:0003700//transcription factor activity, sequence-specific DNA binding;GO:0043565//sequence-specific DNA binding	GO:0006355//regulation of transcription, DNA-templated
miR-281-x	XM_026444541.1	1475	1495	-14.05	tTCTCTCG-TCGTTTGCccatg	x|||||||x|x|x|x||xxxxx	aAGAGAGCTATCCATCGacagt	FOXP4	XP_026300326.1 foxP protein isoform X12 [Apis mellifera]	-	-	-	-	-	GO:0003700//transcription factor activity, sequence-specific DNA binding;GO:0043565//sequence-specific DNA binding	GO:0006355//regulation of transcription, DNA-templated
miR-281-x	XM_026444542.1	1475	1495	-14.05	tTCTCTCG-TCGTTTGCccatg	x|||||||x|x|x|x||xxxxx	aAGAGAGCTATCCATCGacagt	FOXP1	XP_026300327.1 foxP protein isoform X13 [Apis mellifera]	-	-	-	-	-	GO:0003700//transcription factor activity, sequence-specific DNA binding;GO:0043565//sequence-specific DNA binding	GO:0006355//regulation of transcription, DNA-templated
miR-281-x	XM_026444543.1	1475	1495	-14.05	tTCTCTCG-TCGTTTGCccatg	x|||||||x|x|x|x||xxxxx	aAGAGAGCTATCCATCGacagt	FOXP1	XP_026300328.1 foxP protein isoform X14 [Apis mellifera]	-	-	-	-	-	GO:0003700//transcription factor activity, sequence-specific DNA binding;GO:0043565//sequence-specific DNA binding	GO:0006355//regulation of transcription, DNA-templated
miR-281-x	XM_026444544.1	1475	1495	-14.05	tTCTCTCG-TCGTTTGCccatg	x|||||||x|x|x|x||xxxxx	aAGAGAGCTATCCATCGacagt	FOXP1	XP_026300329.1 foxP protein isoform X15 [Apis mellifera]	-	-	-	-	-	GO:0003700//transcription factor activity, sequence-specific DNA binding;GO:0043565//sequence-specific DNA binding	GO:0006355//regulation of transcription, DNA-templated
miR-281-x	XM_026444546.1	1475	1495	-14.05	tTCTCTCG-TCGTTTGCccatg	x|||||||x|x|x|x||xxxxx	aAGAGAGCTATCCATCGacagt	FOXP1	XP_006560352.1 foxP protein isoform X16 [Apis mellifera]	-	-	-	-	-	GO:0003700//transcription factor activity, sequence-specific DNA binding;GO:0043565//sequence-specific DNA binding	GO:0006355//regulation of transcription, DNA-templated
miR-281-x	XM_026444547.1	1475	1495	-14.05	tTCTCTCG-TCGTTTGCccatg	x|||||||x|x|x|x||xxxxx	aAGAGAGCTATCCATCGacagt	FOXP1	XP_006560352.1 foxP protein isoform X16 [Apis mellifera]	-	-	-	-	-	GO:0003700//transcription factor activity, sequence-specific DNA binding;GO:0043565//sequence-specific DNA binding	GO:0006355//regulation of transcription, DNA-templated
miR-281-x	XM_026444548.1	1475	1495	-14.05	tTCTCTCG-TCGTTTGCccatg	x|||||||x|x|x|x||xxxxx	aAGAGAGCTATCCATCGacagt	FOXP1	XP_006560352.1 foxP protein isoform X16 [Apis mellifera]	-	-	-	-	-	GO:0003700//transcription factor activity, sequence-specific DNA binding;GO:0043565//sequence-specific DNA binding	GO:0006355//regulation of transcription, DNA-templated
miR-281-x	XM_026444549.1	1475	1495	-14.05	tTCTCTCG-TCGTTTGCccatg	x|||||||x|x|x|x||xxxxx	aAGAGAGCTATCCATCGacagt	FOXP1	XP_006560352.1 foxP protein isoform X16 [Apis mellifera]	-	-	-	-	-	GO:0003700//transcription factor activity, sequence-specific DNA binding;GO:0043565//sequence-specific DNA binding	GO:0006355//regulation of transcription, DNA-templated
miR-281-x	XM_026444550.1	1475	1495	-14.05	tTCTCTCG-TCGTTTGCccatg	x|||||||x|x|x|x||xxxxx	aAGAGAGCTATCCATCGacagt	FOXP1	XP_006560352.1 foxP protein isoform X16 [Apis mellifera]	-	-	-	-	-	GO:0003700//transcription factor activity, sequence-specific DNA binding;GO:0043565//sequence-specific DNA binding	GO:0006355//regulation of transcription, DNA-templated
miR-281-x	XM_026444551.1	1475	1495	-14.05	tTCTCTCG-TCGTTTGCccatg	x|||||||x|x|x|x||xxxxx	aAGAGAGCTATCCATCGacagt	FOXP1	XP_006560352.1 foxP protein isoform X16 [Apis mellifera]	-	-	-	-	-	GO:0003700//transcription factor activity, sequence-specific DNA binding;GO:0043565//sequence-specific DNA binding	GO:0006355//regulation of transcription, DNA-templated
miR-281-x	XM_026444552.1	1475	1495	-14.05	tTCTCTCG-TCGTTTGCccatg	x|||||||x|x|x|x||xxxxx	aAGAGAGCTATCCATCGacagt	FOXP1	XP_006560352.1 foxP protein isoform X16 [Apis mellifera]	-	-	-	-	-	GO:0003700//transcription factor activity, sequence-specific DNA binding;GO:0043565//sequence-specific DNA binding	GO:0006355//regulation of transcription, DNA-templated
miR-281-x	XM_026444553.1	1475	1495	-14.05	tTCTCTCG-TCGTTTGCccatg	x|||||||x|x|x|x||xxxxx	aAGAGAGCTATCCATCGacagt	FOXP1	XP_006560352.1 foxP protein isoform X16 [Apis mellifera]	-	-	-	-	-	GO:0003700//transcription factor activity, sequence-specific DNA binding;GO:0043565//sequence-specific DNA binding	GO:0006355//regulation of transcription, DNA-templated
miR-281-x	XM_026444555.1	1475	1495	-14.05	tTCTCTCG-TCGTTTGCccatg	x|||||||x|x|x|x||xxxxx	aAGAGAGCTATCCATCGacagt	FOXP1	XP_026300340.1 foxP protein isoform X18 [Apis mellifera]	-	-	-	-	-	GO:0003700//transcription factor activity, sequence-specific DNA binding;GO:0043565//sequence-specific DNA binding	GO:0006355//regulation of transcription, DNA-templated
miR-281-x	XM_026444559.1	79	100	-20.53	tTCTCTCGGCGGAAGGCgacag	x|||||||:x:|xx:||xxxxx	aAGAGAGCTATCCATCGacagt	TpnC47D	XP_026300344.1 troponin C type IIb isoform X1 [Apis mellifera]	Human Diseases;Human Diseases;Environmental Information Processing;Organismal Systems;Environmental Information Processing;Organismal Systems;Environmental Information Processing;Organismal Systems;Environmental Information Processing;Organismal Systems;Human Diseases;Organismal Systems;Organismal Systems;Environmental Information Processing;Human Diseases;Organismal Systems;Organismal Systems;Ce…	Cancers;Neurodegenerative diseases;Signal transduction;Circulatory system;Signal transduction;Nervous system;Signal transduction;Endocrine system;Signal transduction;Endocrine system;Infectious diseases;Endocrine system;Nervous system;Signal transduction;Infectious disease: viral;Endocrine system;Circulatory system;Cell growth and death;Cell growth and death;Environmental adaptation;Endocrine sys…	ko05200//Pathways in cancer;ko05010//Alzheimer disease;ko04024//cAMP signaling pathway;ko04261//Adrenergic signaling in cardiomyocytes;ko04020//Calcium signaling pathway;ko04728//Dopaminergic synapse;ko04022//cGMP - PKG signaling pathway;ko04921//Oxytocin signaling pathway;ko04014//Ras signaling pathway;ko04922//Glucagon signaling pathway;ko05163//Human cytomegalovirus infection;ko04910//Insulin …	K02183;K02183;K02183;K02183;K02183;K02183;K02183;K02183;K02183;K02183;K02183;K02183;K02183;K02183;K02183;K02183;K02183;K02183;K02183;K02183;K02183;K02183;K02183;K02183;K02183;K02183;K02183;K02183;K02183;K02183;K02183;K02183;K02183;K02183;K02183;K02183;K02183;K02183;K02183;K02183;K02183	-	GO:0005509//calcium ion binding;GO:0005515//protein binding	-
miR-281-x	XM_026444560.1	79	100	-20.53	tTCTCTCGGCGGAAGGCgacag	x|||||||:x:|xx:||xxxxx	aAGAGAGCTATCCATCGacagt	TpnC47D	XP_026300345.1 troponin C type IIb isoform X2 [Apis mellifera]	Human Diseases;Human Diseases;Environmental Information Processing;Organismal Systems;Environmental Information Processing;Organismal Systems;Environmental Information Processing;Organismal Systems;Environmental Information Processing;Organismal Systems;Human Diseases;Organismal Systems;Organismal Systems;Environmental Information Processing;Human Diseases;Organismal Systems;Organismal Systems;Ce…	Cancers;Neurodegenerative diseases;Signal transduction;Circulatory system;Signal transduction;Nervous system;Signal transduction;Endocrine system;Signal transduction;Endocrine system;Infectious diseases;Endocrine system;Nervous system;Signal transduction;Infectious disease: viral;Endocrine system;Circulatory system;Cell growth and death;Cell growth and death;Environmental adaptation;Endocrine sys…	ko05200//Pathways in cancer;ko05010//Alzheimer disease;ko04024//cAMP signaling pathway;ko04261//Adrenergic signaling in cardiomyocytes;ko04020//Calcium signaling pathway;ko04728//Dopaminergic synapse;ko04022//cGMP - PKG signaling pathway;ko04921//Oxytocin signaling pathway;ko04014//Ras signaling pathway;ko04922//Glucagon signaling pathway;ko05163//Human cytomegalovirus infection;ko04910//Insulin …	K02183;K02183;K02183;K02183;K02183;K02183;K02183;K02183;K02183;K02183;K02183;K02183;K02183;K02183;K02183;K02183;K02183;K02183;K02183;K02183;K02183;K02183;K02183;K02183;K02183;K02183;K02183;K02183;K02183;K02183;K02183;K02183;K02183;K02183;K02183;K02183;K02183;K02183;K02183;K02183;K02183	GO:0005576//extracellular region	GO:0005126//cytokine receptor binding;GO:0005509//calcium ion binding;GO:0005515//protein binding	GO:0006952//defense response
miR-281-x	XM_026444575.1	4225	4245	-15.24	aTCTCTCGAAAGA-AGTTccgt	x||||||||x||xx||:|xxxx	aAGAGAGCTATCCATCGAcagt	ab	XP_006560410.1 protein abrupt isoform X1 [Apis mellifera]	-	-	-	-	-	GO:0005515//protein binding	-
miR-281-x	XM_026444578.1	2134	2156	-16.66	tTCTCTCGCCGCACG-AGCTCTtg	x|||||||xx:x|x|x||||x|xx	aAGAGAGC--TATCCATCGACAgt	CACNB1	XP_026300363.1 voltage-dependent L-type calcium channel subunit beta-4 isoform X1 [Apis mellifera]	Environmental Information Processing;Organismal Systems;Organismal Systems;Human Diseases;Human Diseases;Organismal Systems;Human Diseases	Signal transduction;Circulatory system;Endocrine system;Cardiovascular diseases;Cardiovascular diseases;Circulatory system;Cardiovascular diseases	ko04010//MAPK signaling pathway;ko04261//Adrenergic signaling in cardiomyocytes;ko04921//Oxytocin signaling pathway;ko05414//Dilated cardiomyopathy (DCM);ko05410//Hypertrophic cardiomyopathy (HCM);ko04260//Cardiac muscle contraction;ko05412//Arrhythmogenic right ventricular cardiomyopathy (ARVC)	K04863;K04863;K04863;K04863;K04863;K04863;K04863	GO:0005891//voltage-gated calcium channel complex	GO:0004385//guanylate kinase activity;GO:0005245//voltage-gated calcium channel activity;GO:0005515//protein binding	GO:0015949//nucleobase-containing small molecule interconversion;GO:0070588//calcium ion transmembrane transport
miR-281-x	XM_026444579.1	2134	2156	-16.66	tTCTCTCGCCGCACG-AGCTCTtg	x|||||||xx:x|x|x||||x|xx	aAGAGAGC--TATCCATCGACAgt	CACNB1	XP_026300363.1 voltage-dependent L-type calcium channel subunit beta-4 isoform X1 [Apis mellifera]	Environmental Information Processing;Organismal Systems;Organismal Systems;Human Diseases;Human Diseases;Organismal Systems;Human Diseases	Signal transduction;Circulatory system;Endocrine system;Cardiovascular diseases;Cardiovascular diseases;Circulatory system;Cardiovascular diseases	ko04010//MAPK signaling pathway;ko04261//Adrenergic signaling in cardiomyocytes;ko04921//Oxytocin signaling pathway;ko05414//Dilated cardiomyopathy (DCM);ko05410//Hypertrophic cardiomyopathy (HCM);ko04260//Cardiac muscle contraction;ko05412//Arrhythmogenic right ventricular cardiomyopathy (ARVC)	K04863;K04863;K04863;K04863;K04863;K04863;K04863	GO:0005891//voltage-gated calcium channel complex	GO:0004385//guanylate kinase activity;GO:0005245//voltage-gated calcium channel activity;GO:0005515//protein binding	GO:0015949//nucleobase-containing small molecule interconversion;GO:0070588//calcium ion transmembrane transport
miR-281-x	XM_026444580.1	2134	2156	-16.66	tTCTCTCGCCGCACG-AGCTCTtg	x|||||||xx:x|x|x||||x|xx	aAGAGAGC--TATCCATCGACAgt	CACNB1	XP_026300363.1 voltage-dependent L-type calcium channel subunit beta-4 isoform X1 [Apis mellifera]	Environmental Information Processing;Organismal Systems;Organismal Systems;Human Diseases;Human Diseases;Organismal Systems;Human Diseases	Signal transduction;Circulatory system;Endocrine system;Cardiovascular diseases;Cardiovascular diseases;Circulatory system;Cardiovascular diseases	ko04010//MAPK signaling pathway;ko04261//Adrenergic signaling in cardiomyocytes;ko04921//Oxytocin signaling pathway;ko05414//Dilated cardiomyopathy (DCM);ko05410//Hypertrophic cardiomyopathy (HCM);ko04260//Cardiac muscle contraction;ko05412//Arrhythmogenic right ventricular cardiomyopathy (ARVC)	K04863;K04863;K04863;K04863;K04863;K04863;K04863	GO:0005891//voltage-gated calcium channel complex	GO:0004385//guanylate kinase activity;GO:0005245//voltage-gated calcium channel activity;GO:0005515//protein binding	GO:0015949//nucleobase-containing small molecule interconversion;GO:0070588//calcium ion transmembrane transport
miR-281-x	XM_026444581.1	2134	2156	-16.66	tTCTCTCGCCGCACG-AGCTCTtg	x|||||||xx:x|x|x||||x|xx	aAGAGAGC--TATCCATCGACAgt	CACNB1	XP_026300366.1 voltage-dependent L-type calcium channel subunit beta-4 isoform X2 [Apis mellifera]	Environmental Information Processing;Organismal Systems;Organismal Systems;Human Diseases;Human Diseases;Organismal Systems;Human Diseases	Signal transduction;Circulatory system;Endocrine system;Cardiovascular diseases;Cardiovascular diseases;Circulatory system;Cardiovascular diseases	ko04010//MAPK signaling pathway;ko04261//Adrenergic signaling in cardiomyocytes;ko04921//Oxytocin signaling pathway;ko05414//Dilated cardiomyopathy (DCM);ko05410//Hypertrophic cardiomyopathy (HCM);ko04260//Cardiac muscle contraction;ko05412//Arrhythmogenic right ventricular cardiomyopathy (ARVC)	K04863;K04863;K04863;K04863;K04863;K04863;K04863	GO:0005891//voltage-gated calcium channel complex	GO:0004385//guanylate kinase activity;GO:0005245//voltage-gated calcium channel activity;GO:0005515//protein binding	GO:0015949//nucleobase-containing small molecule interconversion;GO:0070588//calcium ion transmembrane transport
miR-281-x	XM_026444582.1	2134	2156	-16.66	tTCTCTCGCCGCACG-AGCTCTtg	x|||||||xx:x|x|x||||x|xx	aAGAGAGC--TATCCATCGACAgt	CACNB1	XP_026300367.1 voltage-dependent L-type calcium channel subunit beta-3 isoform X3 [Apis mellifera]	Environmental Information Processing;Organismal Systems;Organismal Systems;Human Diseases;Human Diseases;Organismal Systems;Human Diseases	Signal transduction;Circulatory system;Endocrine system;Cardiovascular diseases;Cardiovascular diseases;Circulatory system;Cardiovascular diseases	ko04010//MAPK signaling pathway;ko04261//Adrenergic signaling in cardiomyocytes;ko04921//Oxytocin signaling pathway;ko05414//Dilated cardiomyopathy (DCM);ko05410//Hypertrophic cardiomyopathy (HCM);ko04260//Cardiac muscle contraction;ko05412//Arrhythmogenic right ventricular cardiomyopathy (ARVC)	K04863;K04863;K04863;K04863;K04863;K04863;K04863	GO:0005891//voltage-gated calcium channel complex	GO:0004385//guanylate kinase activity;GO:0005245//voltage-gated calcium channel activity;GO:0005515//protein binding	GO:0015949//nucleobase-containing small molecule interconversion;GO:0070588//calcium ion transmembrane transport
miR-281-x	XM_026444583.1	2134	2156	-16.66	tTCTCTCGCCGCACG-AGCTCTtg	x|||||||xx:x|x|x||||x|xx	aAGAGAGC--TATCCATCGACAgt	CACNB1	XP_026300368.1 voltage-dependent L-type calcium channel subunit beta-1 isoform X4 [Apis mellifera]	Environmental Information Processing;Organismal Systems;Organismal Systems;Human Diseases;Human Diseases;Organismal Systems;Human Diseases	Signal transduction;Circulatory system;Endocrine system;Cardiovascular diseases;Cardiovascular diseases;Circulatory system;Cardiovascular diseases	ko04010//MAPK signaling pathway;ko04261//Adrenergic signaling in cardiomyocytes;ko04921//Oxytocin signaling pathway;ko05414//Dilated cardiomyopathy (DCM);ko05410//Hypertrophic cardiomyopathy (HCM);ko04260//Cardiac muscle contraction;ko05412//Arrhythmogenic right ventricular cardiomyopathy (ARVC)	K04863;K04863;K04863;K04863;K04863;K04863;K04863	GO:0005891//voltage-gated calcium channel complex	GO:0004385//guanylate kinase activity;GO:0005245//voltage-gated calcium channel activity;GO:0005515//protein binding	GO:0015949//nucleobase-containing small molecule interconversion;GO:0070588//calcium ion transmembrane transport
miR-281-x	XM_026444584.1	2134	2156	-16.66	tTCTCTCGCCGCACG-AGCTCTtg	x|||||||xx:x|x|x||||x|xx	aAGAGAGC--TATCCATCGACAgt	CACNB1	XP_026300369.1 voltage-dependent L-type calcium channel subunit beta-3 isoform X5 [Apis mellifera]	Environmental Information Processing;Organismal Systems;Organismal Systems;Human Diseases;Human Diseases;Organismal Systems;Human Diseases	Signal transduction;Circulatory system;Endocrine system;Cardiovascular diseases;Cardiovascular diseases;Circulatory system;Cardiovascular diseases	ko04010//MAPK signaling pathway;ko04261//Adrenergic signaling in cardiomyocytes;ko04921//Oxytocin signaling pathway;ko05414//Dilated cardiomyopathy (DCM);ko05410//Hypertrophic cardiomyopathy (HCM);ko04260//Cardiac muscle contraction;ko05412//Arrhythmogenic right ventricular cardiomyopathy (ARVC)	K04863;K04863;K04863;K04863;K04863;K04863;K04863	GO:0005891//voltage-gated calcium channel complex	GO:0004385//guanylate kinase activity;GO:0005245//voltage-gated calcium channel activity;GO:0005515//protein binding	GO:0015949//nucleobase-containing small molecule interconversion;GO:0070588//calcium ion transmembrane transport
miR-281-x	XM_026444585.1	2134	2156	-16.66	tTCTCTCGCCGCACG-AGCTCTtg	x|||||||xx:x|x|x||||x|xx	aAGAGAGC--TATCCATCGACAgt	CACNB1	XP_026300370.1 voltage-dependent L-type calcium channel subunit beta-1 isoform X6 [Apis mellifera]	Environmental Information Processing;Organismal Systems;Organismal Systems;Human Diseases;Human Diseases;Organismal Systems;Human Diseases	Signal transduction;Circulatory system;Endocrine system;Cardiovascular diseases;Cardiovascular diseases;Circulatory system;Cardiovascular diseases	ko04010//MAPK signaling pathway;ko04261//Adrenergic signaling in cardiomyocytes;ko04921//Oxytocin signaling pathway;ko05414//Dilated cardiomyopathy (DCM);ko05410//Hypertrophic cardiomyopathy (HCM);ko04260//Cardiac muscle contraction;ko05412//Arrhythmogenic right ventricular cardiomyopathy (ARVC)	K04863;K04863;K04863;K04863;K04863;K04863;K04863	GO:0005891//voltage-gated calcium channel complex	GO:0004385//guanylate kinase activity;GO:0005245//voltage-gated calcium channel activity;GO:0005515//protein binding	GO:0015949//nucleobase-containing small molecule interconversion;GO:0070588//calcium ion transmembrane transport
miR-281-x	XM_026444586.1	2134	2156	-16.66	tTCTCTCGCCGCACG-AGCTCTtg	x|||||||xx:x|x|x||||x|xx	aAGAGAGC--TATCCATCGACAgt	CACNB1	XP_026300371.1 voltage-dependent L-type calcium channel subunit beta-3 isoform X7 [Apis mellifera]	Environmental Information Processing;Organismal Systems;Organismal Systems;Human Diseases;Human Diseases;Organismal Systems;Human Diseases	Signal transduction;Circulatory system;Endocrine system;Cardiovascular diseases;Cardiovascular diseases;Circulatory system;Cardiovascular diseases	ko04010//MAPK signaling pathway;ko04261//Adrenergic signaling in cardiomyocytes;ko04921//Oxytocin signaling pathway;ko05414//Dilated cardiomyopathy (DCM);ko05410//Hypertrophic cardiomyopathy (HCM);ko04260//Cardiac muscle contraction;ko05412//Arrhythmogenic right ventricular cardiomyopathy (ARVC)	K04863;K04863;K04863;K04863;K04863;K04863;K04863	GO:0005891//voltage-gated calcium channel complex	GO:0004385//guanylate kinase activity;GO:0005245//voltage-gated calcium channel activity;GO:0005515//protein binding	GO:0015949//nucleobase-containing small molecule interconversion;GO:0070588//calcium ion transmembrane transport
miR-281-x	XM_026444587.1	2134	2156	-16.66	tTCTCTCGCCGCACG-AGCTCTtg	x|||||||xx:x|x|x||||x|xx	aAGAGAGC--TATCCATCGACAgt	CACNB1	XP_026300372.1 voltage-dependent L-type calcium channel subunit beta-2 isoform X8 [Apis mellifera]	Environmental Information Processing;Organismal Systems;Organismal Systems;Human Diseases;Human Diseases;Organismal Systems;Human Diseases	Signal transduction;Circulatory system;Endocrine system;Cardiovascular diseases;Cardiovascular diseases;Circulatory system;Cardiovascular diseases	ko04010//MAPK signaling pathway;ko04261//Adrenergic signaling in cardiomyocytes;ko04921//Oxytocin signaling pathway;ko05414//Dilated cardiomyopathy (DCM);ko05410//Hypertrophic cardiomyopathy (HCM);ko04260//Cardiac muscle contraction;ko05412//Arrhythmogenic right ventricular cardiomyopathy (ARVC)	K04863;K04863;K04863;K04863;K04863;K04863;K04863	GO:0005891//voltage-gated calcium channel complex	GO:0004385//guanylate kinase activity;GO:0005245//voltage-gated calcium channel activity;GO:0005515//protein binding	GO:0015949//nucleobase-containing small molecule interconversion;GO:0070588//calcium ion transmembrane transport
miR-281-x	XM_026444590.1	2134	2156	-16.66	tTCTCTCGCCGCACG-AGCTCTtg	x|||||||xx:x|x|x||||x|xx	aAGAGAGC--TATCCATCGACAgt	CACNB1	XP_026300375.1 voltage-dependent L-type calcium channel subunit beta-2 isoform X11 [Apis mellifera]	Environmental Information Processing;Organismal Systems;Organismal Systems;Human Diseases;Human Diseases;Organismal Systems;Human Diseases	Signal transduction;Circulatory system;Endocrine system;Cardiovascular diseases;Cardiovascular diseases;Circulatory system;Cardiovascular diseases	ko04010//MAPK signaling pathway;ko04261//Adrenergic signaling in cardiomyocytes;ko04921//Oxytocin signaling pathway;ko05414//Dilated cardiomyopathy (DCM);ko05410//Hypertrophic cardiomyopathy (HCM);ko04260//Cardiac muscle contraction;ko05412//Arrhythmogenic right ventricular cardiomyopathy (ARVC)	K04863;K04863;K04863;K04863;K04863;K04863;K04863	GO:0005891//voltage-gated calcium channel complex	GO:0004385//guanylate kinase activity;GO:0005245//voltage-gated calcium channel activity;GO:0005515//protein binding	GO:0015949//nucleobase-containing small molecule interconversion;GO:0070588//calcium ion transmembrane transport
miR-281-x	XM_026444591.1	2134	2156	-16.66	tTCTCTCGCCGCACG-AGCTCTtg	x|||||||xx:x|x|x||||x|xx	aAGAGAGC--TATCCATCGACAgt	CACNB1	XP_026300375.1 voltage-dependent L-type calcium channel subunit beta-2 isoform X11 [Apis mellifera]	Environmental Information Processing;Organismal Systems;Organismal Systems;Human Diseases;Human Diseases;Organismal Systems;Human Diseases	Signal transduction;Circulatory system;Endocrine system;Cardiovascular diseases;Cardiovascular diseases;Circulatory system;Cardiovascular diseases	ko04010//MAPK signaling pathway;ko04261//Adrenergic signaling in cardiomyocytes;ko04921//Oxytocin signaling pathway;ko05414//Dilated cardiomyopathy (DCM);ko05410//Hypertrophic cardiomyopathy (HCM);ko04260//Cardiac muscle contraction;ko05412//Arrhythmogenic right ventricular cardiomyopathy (ARVC)	K04863;K04863;K04863;K04863;K04863;K04863;K04863	GO:0005891//voltage-gated calcium channel complex	GO:0004385//guanylate kinase activity;GO:0005245//voltage-gated calcium channel activity;GO:0005515//protein binding	GO:0015949//nucleobase-containing small molecule interconversion;GO:0070588//calcium ion transmembrane transport
miR-281-x	XM_026444592.1	2134	2156	-16.66	tTCTCTCGCCGCACG-AGCTCTtg	x|||||||xx:x|x|x||||x|xx	aAGAGAGC--TATCCATCGACAgt	CACNB2	XP_026300377.1 voltage-dependent L-type calcium channel subunit beta-2 isoform X12 [Apis mellifera]	Environmental Information Processing;Organismal Systems;Organismal Systems;Human Diseases;Human Diseases;Organismal Systems;Human Diseases	Signal transduction;Circulatory system;Endocrine system;Cardiovascular diseases;Cardiovascular diseases;Circulatory system;Cardiovascular diseases	ko04010//MAPK signaling pathway;ko04261//Adrenergic signaling in cardiomyocytes;ko04921//Oxytocin signaling pathway;ko05414//Dilated cardiomyopathy (DCM);ko05410//Hypertrophic cardiomyopathy (HCM);ko04260//Cardiac muscle contraction;ko05412//Arrhythmogenic right ventricular cardiomyopathy (ARVC)	K04863;K04863;K04863;K04863;K04863;K04863;K04863	GO:0005891//voltage-gated calcium channel complex	GO:0004385//guanylate kinase activity;GO:0005245//voltage-gated calcium channel activity;GO:0005515//protein binding	GO:0015949//nucleobase-containing small molecule interconversion;GO:0070588//calcium ion transmembrane transport
miR-281-x	XM_026444593.1	2134	2156	-16.66	tTCTCTCGCCGCACG-AGCTCTtg	x|||||||xx:x|x|x||||x|xx	aAGAGAGC--TATCCATCGACAgt	CACNB2	XP_026300377.1 voltage-dependent L-type calcium channel subunit beta-2 isoform X12 [Apis mellifera]	Environmental Information Processing;Organismal Systems;Organismal Systems;Human Diseases;Human Diseases;Organismal Systems;Human Diseases	Signal transduction;Circulatory system;Endocrine system;Cardiovascular diseases;Cardiovascular diseases;Circulatory system;Cardiovascular diseases	ko04010//MAPK signaling pathway;ko04261//Adrenergic signaling in cardiomyocytes;ko04921//Oxytocin signaling pathway;ko05414//Dilated cardiomyopathy (DCM);ko05410//Hypertrophic cardiomyopathy (HCM);ko04260//Cardiac muscle contraction;ko05412//Arrhythmogenic right ventricular cardiomyopathy (ARVC)	K04863;K04863;K04863;K04863;K04863;K04863;K04863	GO:0005891//voltage-gated calcium channel complex	GO:0004385//guanylate kinase activity;GO:0005245//voltage-gated calcium channel activity;GO:0005515//protein binding	GO:0015949//nucleobase-containing small molecule interconversion;GO:0070588//calcium ion transmembrane transport
miR-281-x	XM_026444594.1	2134	2156	-16.66	tTCTCTCGCCGCACG-AGCTCTtg	x|||||||xx:x|x|x||||x|xx	aAGAGAGC--TATCCATCGACAgt	CACNB2	XP_026300379.1 voltage-dependent L-type calcium channel subunit beta-2 isoform X13 [Apis mellifera]	Environmental Information Processing;Organismal Systems;Organismal Systems;Human Diseases;Human Diseases;Organismal Systems;Human Diseases	Signal transduction;Circulatory system;Endocrine system;Cardiovascular diseases;Cardiovascular diseases;Circulatory system;Cardiovascular diseases	ko04010//MAPK signaling pathway;ko04261//Adrenergic signaling in cardiomyocytes;ko04921//Oxytocin signaling pathway;ko05414//Dilated cardiomyopathy (DCM);ko05410//Hypertrophic cardiomyopathy (HCM);ko04260//Cardiac muscle contraction;ko05412//Arrhythmogenic right ventricular cardiomyopathy (ARVC)	K04863;K04863;K04863;K04863;K04863;K04863;K04863	GO:0005891//voltage-gated calcium channel complex	GO:0004385//guanylate kinase activity;GO:0005245//voltage-gated calcium channel activity;GO:0005515//protein binding	GO:0015949//nucleobase-containing small molecule interconversion;GO:0070588//calcium ion transmembrane transport
miR-281-x	XM_026444595.1	2134	2156	-16.66	tTCTCTCGCCGCACG-AGCTCTtg	x|||||||xx:x|x|x||||x|xx	aAGAGAGC--TATCCATCGACAgt	CACNB1	XP_026300380.1 voltage-dependent L-type calcium channel subunit beta-2 isoform X14 [Apis mellifera]	Environmental Information Processing;Organismal Systems;Organismal Systems;Human Diseases;Human Diseases;Organismal Systems;Human Diseases	Signal transduction;Circulatory system;Endocrine system;Cardiovascular diseases;Cardiovascular diseases;Circulatory system;Cardiovascular diseases	ko04010//MAPK signaling pathway;ko04261//Adrenergic signaling in cardiomyocytes;ko04921//Oxytocin signaling pathway;ko05414//Dilated cardiomyopathy (DCM);ko05410//Hypertrophic cardiomyopathy (HCM);ko04260//Cardiac muscle contraction;ko05412//Arrhythmogenic right ventricular cardiomyopathy (ARVC)	K04863;K04863;K04863;K04863;K04863;K04863;K04863	GO:0005891//voltage-gated calcium channel complex	GO:0004385//guanylate kinase activity;GO:0005245//voltage-gated calcium channel activity;GO:0005515//protein binding	GO:0015949//nucleobase-containing small molecule interconversion;GO:0070588//calcium ion transmembrane transport
miR-281-x	XM_026444734.1	4323	4344	-15.01	tTCTCTCGTAAGCAAACAGcga	x|||||||xx||xx|x|x|xxx	aAGAGAGCTATCCATCGACagt	--	XP_016771408.2 uncharacterized protein LOC725354 isoform X1 [Apis mellifera]	-	-	-	-	-	-	-
miR-281-x	XM_026444735.1	4323	4344	-15.01	tTCTCTCGTAAGCAAACAGcga	x|||||||xx||xx|x|x|xxx	aAGAGAGCTATCCATCGACagt	--	XP_016771408.2 uncharacterized protein LOC725354 isoform X1 [Apis mellifera]	-	-	-	-	-	-	-
miR-281-x	XM_026444804.1	2937	2960	-15.08	tTCTCTCGGGAAAGTGAACTtcgc	x|||||||xx|x||xx|x||xxxx	aAGAGAGC--TATCCATCGAcagt	POU6F2	XP_026300589.1 POU domain, class 6, transcription factor 1 isoform X2 [Apis mellifera]	-	-	-	-	-	GO:0003677//DNA binding;GO:0003700//transcription factor activity, sequence-specific DNA binding	GO:0006355//regulation of transcription, DNA-templated
miR-281-x	XM_026444805.1	2937	2960	-15.08	tTCTCTCGGGAAAGTGAACTtcgc	x|||||||xx|x||xx|x||xxxx	aAGAGAGC--TATCCATCGAcagt	POU6F2	XP_026300590.1 POU domain, class 6, transcription factor 1 isoform X3 [Apis mellifera]	-	-	-	-	-	GO:0003677//DNA binding;GO:0003700//transcription factor activity, sequence-specific DNA binding	GO:0006355//regulation of transcription, DNA-templated
miR-281-x	XM_026444806.1	2937	2960	-15.08	tTCTCTCGGGAAAGTGAACTtcgc	x|||||||xx|x||xx|x||xxxx	aAGAGAGC--TATCCATCGAcagt	POU6F2	XP_026300591.1 POU domain, class 6, transcription factor 1 isoform X4 [Apis mellifera]	-	-	-	-	-	GO:0003677//DNA binding;GO:0003700//transcription factor activity, sequence-specific DNA binding	GO:0006355//regulation of transcription, DNA-templated
miR-281-x	XM_026444807.1	2937	2960	-15.08	tTCTCTCGGGAAAGTGAACTtcgc	x|||||||xx|x||xx|x||xxxx	aAGAGAGC--TATCCATCGAcagt	POU6F2	XP_031772954.1 POU domain, class 6, transcription factor 1 isoform X1 [Apis florea]	-	-	-	-	-	GO:0003677//DNA binding;GO:0003700//transcription factor activity, sequence-specific DNA binding	GO:0006355//regulation of transcription, DNA-templated
miR-281-x	XM_026444808.1	2937	2960	-15.08	tTCTCTCGGGAAAGTGAACTtcgc	x|||||||xx|x||xx|x||xxxx	aAGAGAGC--TATCCATCGAcagt	POU6F2	XP_026300593.1 POU domain, class 6, transcription factor 1 isoform X6 [Apis mellifera]	-	-	-	-	-	GO:0003677//DNA binding;GO:0003700//transcription factor activity, sequence-specific DNA binding	GO:0006355//regulation of transcription, DNA-templated
miR-281-x	XM_026444809.1	2937	2960	-15.08	tTCTCTCGGGAAAGTGAACTtcgc	x|||||||xx|x||xx|x||xxxx	aAGAGAGC--TATCCATCGAcagt	POU6F2	XP_026300594.1 POU domain, class 6, transcription factor 1 isoform X7 [Apis mellifera]	-	-	-	-	-	GO:0003677//DNA binding;GO:0003700//transcription factor activity, sequence-specific DNA binding	GO:0006355//regulation of transcription, DNA-templated
miR-281-x	XM_026444829.1	208	229	-13.85	tTCTCTCGtccatccacctgct	x|||||||xxxxxxxxxxxxxx	aAGAGAGCtatccatcgacagt	Gad1	XP_026300614.1 glutamate decarboxylase isoform X1 [Apis mellifera]	Metabolism;Organismal Systems;Metabolism;Metabolism;Metabolism;Metabolism;Human Diseases	Global and overview maps;Nervous system;Metabolism of other amino acids;Amino acid metabolism;Carbohydrate metabolism;Metabolism of other amino acids;Endocrine and metabolic diseases	ko01100//Metabolic pathways;ko04727//GABAergic synapse;ko00410//beta-Alanine metabolism;ko00250//Alanine, aspartate and glutamate metabolism;ko00650//Butanoate metabolism;ko00430//Taurine and hypotaurine metabolism;ko04940//Type I diabetes mellitus	K01580;K01580;K01580;K01580;K01580;K01580;K01580	-	GO:0003824//catalytic activity;GO:0004351//glutamate decarboxylase activity;GO:0004837//tyrosine decarboxylase activity;GO:0016740//transferase activity;GO:0016829//lyase activity;GO:0016831//carboxy-lyase activity;GO:0030170//pyridoxal phosphate binding;GO:0031071//cysteine desulfurase activity	GO:0006520//cellular amino acid metabolic process;GO:0006540//glutamate decarboxylation to succinate;GO:0006572//tyrosine catabolic process;GO:0015940//pantothenate biosynthetic process;GO:0016226//iron-sulfur cluster assembly;GO:0019752//carboxylic acid metabolic process;GO:0051188//cofactor biosynthetic process
miR-281-x	XM_026444874.1	1428	1448	-14.53	tTCTCTCGA-ATTTAGaaataa	x||||||||x|xx|||xxxxxx	aAGAGAGCTATCCATCgacagt	GluClalpha	XP_026300659.1 glutamate-gated chloride channel isoform X9 [Apis mellifera]	-	-	-	-	GO:0016021//integral component of membrane	GO:0005230//extracellular ligand-gated ion channel activity	GO:0006811//ion transport
miR-281-x	XM_026444986.1	108	128	-19.4	tTCTCTCG-TAATTAGCGGTtc	x|||||||x||xx||||x||xx	aAGAGAGCTATCCATCGACAgt	Kat6b	XP_026300771.1 histone acetyltransferase KAT6B isoform X1 [Apis mellifera]	-	-	-	-	GO:0000786//nucleosome	GO:0003677//DNA binding;GO:0004402//histone acetyltransferase activity;GO:0008080//N-acetyltransferase activity	GO:0006334//nucleosome assembly;GO:0006355//regulation of transcription, DNA-templated;GO:0016573//histone acetylation
miR-281-x	XM_026444987.1	108	128	-19.4	tTCTCTCG-TAATTAGCGGTtc	x|||||||x||xx||||x||xx	aAGAGAGCTATCCATCGACAgt	Kat6b	XP_026300771.1 histone acetyltransferase KAT6B isoform X1 [Apis mellifera]	-	-	-	-	GO:0000786//nucleosome	GO:0003677//DNA binding;GO:0004402//histone acetyltransferase activity;GO:0008080//N-acetyltransferase activity	GO:0006334//nucleosome assembly;GO:0006355//regulation of transcription, DNA-templated;GO:0016573//histone acetylation
miR-281-x	XM_026444988.1	108	128	-19.4	tTCTCTCG-TAATTAGCGGTtc	x|||||||x||xx||||x||xx	aAGAGAGCTATCCATCGACAgt	KAT6B	XP_026300773.1 histone acetyltransferase KAT6B isoform X2 [Apis mellifera]	-	-	-	-	GO:0000786//nucleosome	GO:0003677//DNA binding;GO:0004402//histone acetyltransferase activity;GO:0008080//N-acetyltransferase activity	GO:0006334//nucleosome assembly;GO:0006355//regulation of transcription, DNA-templated;GO:0016573//histone acetylation
miR-281-x	XM_026444989.1	108	128	-19.4	tTCTCTCG-TAATTAGCGGTtc	x|||||||x||xx||||x||xx	aAGAGAGCTATCCATCGACAgt	Kat6b	XP_026300774.1 histone acetyltransferase KAT6B isoform X3 [Apis mellifera]	-	-	-	-	-	GO:0004402//histone acetyltransferase activity;GO:0008080//N-acetyltransferase activity	GO:0006355//regulation of transcription, DNA-templated;GO:0016573//histone acetylation
miR-281-x	XM_026445120.1	81	105	-22.21	gTCTCTCGACAGAGATAGCTCGTat	x||||||||x||x|x|||||x||xx	aAGAGAGCTATC-C-ATCGA-CAgt	Smg1	XP_026300905.1 serine/threonine-protein kinase SMG1 isoform X1 [Apis mellifera]	Genetic Information Processing	Translation	ko03015//mRNA surveillance pathway	K08873	-	GO:0004674//protein serine/threonine kinase activity;GO:0005515//protein binding;GO:0044877//macromolecular complex binding	GO:0000184//nuclear-transcribed mRNA catabolic process, nonsense-mediated decay;GO:0016310//phosphorylation
miR-281-x	XM_026445653.1	89	111	-16.12	tTCTCTCGCATAAGGAaaaaaga	x|||||||x|||x|x|xxxxxxx	aAGAGAGC-TATCCATcgacagt	Slc6a5	XP_026301438.1 sodium- and chloride-dependent glycine transporter 2 isoform X3 [Apis mellifera]	Organismal Systems	Nervous system	ko04721//Synaptic vesicle cycle	K05038	GO:0016021//integral component of membrane	-	-
miR-281-x	XM_026445654.1	89	111	-16.12	tTCTCTCGCATAAGGAaaaaaga	x|||||||x|||x|x|xxxxxxx	aAGAGAGC-TATCCATcgacagt	Slc6a5	XP_026301439.1 sodium-dependent proline transporter isoform X4 [Apis mellifera]	Organismal Systems	Nervous system	ko04721//Synaptic vesicle cycle	K05038	GO:0016021//integral component of membrane	-	-
miR-281-x	XM_026445717.1	294	315	-12.16	tTCTCTCGTTTGTTTTTTTTtt	x|||||||x|x|x|xx:|x|xx	aAGAGAGCTATCCATCGACAgt	Scr	XP_026301502.1 homeobox protein H55 [Apis mellifera]	-	-	-	-	-	GO:0003677//DNA binding	-
miR-281-x	XM_026445869.1	1635	1656	-16.72	cTCTCTCGtgcgcgtcacgaca	x|||||||xxxxxxxxxxxxxx	aAGAGAGCtatccatcgacagt	--	XP_026301654.1 uncharacterized protein LOC113219320 [Apis mellifera]	-	-	-	-	-	-	-
miR-281-x	XM_026446031.1	1888	1912	-18.21	tTCTCTCGTAATGCGAGAGCattta	x|||||||xx||:x|xx|||xxxxx	aAGAGAGC--TATCCA-TCGacagt	--	XP_026301816.1 uncharacterized protein LOC113218530 [Apis mellifera]	-	-	-	-	-	-	-
miR-281-x	XM_026446053.1	2132	2152	-12.9	aTCTCTCGACAC-TACTTcaaa	x||||||||x|xx||x:|xxxx	aAGAGAGCTATCCATCGAcagt	TEAD1	XP_006562586.1 transcriptional enhancer factor TEF-1 isoform X2 [Apis mellifera]	Environmental Information Processing;Environmental Information Processing;Environmental Information Processing	Signal transduction;Signal transduction;Signal transduction	ko04390//Hippo signaling pathway;ko04391//Hippo signaling pathway -fly;ko04392//Hippo signaling pathway - multiple species	K09448;K09448;K09448	-	GO:0003700//transcription factor activity, sequence-specific DNA binding	GO:0006355//regulation of transcription, DNA-templated
miR-281-x	XM_026446054.1	2132	2152	-12.9	aTCTCTCGACAC-TACTTcaaa	x||||||||x|xx||x:|xxxx	aAGAGAGCTATCCATCGAcagt	TEAD1	XP_026301839.1 transcriptional enhancer factor TEF-1 isoform X3 [Apis mellifera]	Environmental Information Processing;Environmental Information Processing;Environmental Information Processing	Signal transduction;Signal transduction;Signal transduction	ko04390//Hippo signaling pathway;ko04391//Hippo signaling pathway -fly;ko04392//Hippo signaling pathway - multiple species	K09448;K09448;K09448	-	GO:0003700//transcription factor activity, sequence-specific DNA binding	GO:0006355//regulation of transcription, DNA-templated
miR-281-x	XM_026446055.1	2132	2152	-12.9	aTCTCTCGACAC-TACTTcaaa	x||||||||x|xx||x:|xxxx	aAGAGAGCTATCCATCGAcagt	TEAD1	XP_026301840.1 transcriptional enhancer factor TEF-1 isoform X7 [Apis mellifera]	Environmental Information Processing;Environmental Information Processing;Environmental Information Processing	Signal transduction;Signal transduction;Signal transduction	ko04390//Hippo signaling pathway;ko04391//Hippo signaling pathway -fly;ko04392//Hippo signaling pathway - multiple species	K09448;K09448;K09448	-	GO:0003700//transcription factor activity, sequence-specific DNA binding	GO:0006355//regulation of transcription, DNA-templated
miR-281-x	XM_026446070.1	244	265	-11.68	tTCTCTCGCTctctctttctct	x|||||||x|xxxxxxxxxxxx	aAGAGAGCTAtccatcgacagt	GRIK2	XP_026301855.1 glutamate receptor ionotropic, kainate 2 isoform X1 [Apis mellifera]	-	-	-	-	GO:0016020//membrane;GO:0030288//outer membrane-bounded periplasmic space;GO:0031362//anchored component of external side of plasma membrane	GO:0004970//ionotropic glutamate receptor activity;GO:0015276//ligand-gated ion channel activity;GO:0033286//ectoine-transporting ATPase activity;GO:0033288//hydroxyectoine-transporting ATPase activity;GO:0033294//ectoine binding;GO:0033295//hydroxyectoine binding	GO:0033308//hydroxyectoine transport;GO:0051470//ectoine transport
miR-281-x	XM_026446071.1	3328	3349	-11.68	tTCTCTCGCTctctctttctct	x|||||||x|xxxxxxxxxxxx	aAGAGAGCTAtccatcgacagt	GRIK2	XP_016918910.1 glutamate receptor ionotropic, kainate 2 isoform X3 [Apis cerana]	-	-	-	-	GO:0016020//membrane;GO:0030288//outer membrane-bounded periplasmic space;GO:0031362//anchored component of external side of plasma membrane	GO:0004970//ionotropic glutamate receptor activity;GO:0015276//ligand-gated ion channel activity;GO:0033286//ectoine-transporting ATPase activity;GO:0033288//hydroxyectoine-transporting ATPase activity;GO:0033294//ectoine binding;GO:0033295//hydroxyectoine binding	GO:0033308//hydroxyectoine transport;GO:0051470//ectoine transport
miR-281-x	XM_026446199.1	382	404	-17.16	aTCTCTCGTTATGTGCGCTATgt	x|||||||x||x||:x|||x|xx	aAGAGAGCTATCCAT-CGACAgt	RRAD	XP_026301984.1 uncharacterized protein LOC107964025 isoform X3 [Apis mellifera]	-	-	-	-	GO:0005737//cytoplasm	GO:0003924//GTPase activity;GO:0005525//GTP binding;GO:0043022//ribosome binding	GO:0042254//ribosome biogenesis
miR-281-x	XM_026446238.1	1595	1613	-13.47	cTCTCTCGC---GTTGCTCTtt	x|||||||xxxx||x|||x|xx	aAGAGAGCTATCCATCGACAgt	--	XP_026302023.1 uncharacterized protein LOC409327 isoform X1 [Apis mellifera]	-	-	-	-	-	-	-
miR-281-x	XM_026446243.1	1595	1613	-13.47	cTCTCTCGC---GTTGCTCTtt	x|||||||xxxx||x|||x|xx	aAGAGAGCTATCCATCGACAgt	--	XP_026302023.1 uncharacterized protein LOC409327 isoform X1 [Apis mellifera]	-	-	-	-	-	-	-
miR-281-x	XM_026446244.1	1088	1112	-18.28	cTCTCTCGTTTTGATGTAGCTtgct	x|||||||x|xxx|x||||||xxxx	aAGAGAGCTA---TCCATCGAcagt	--	XP_026302029.1 peroxidasin [Apis mellifera]	-	-	-	-	-	-	-
miR-281-x	XM_026446245.1	1088	1112	-18.28	cTCTCTCGTTTTGATGTAGCTtgct	x|||||||x|xxx|x||||||xxxx	aAGAGAGCTA---TCCATCGAcagt	--	XP_026302029.1 peroxidasin [Apis mellifera]	-	-	-	-	-	-	-
miR-281-x	XM_026446246.1	1088	1112	-18.28	cTCTCTCGTTTTGATGTAGCTtgct	x|||||||x|xxx|x||||||xxxx	aAGAGAGCTA---TCCATCGAcagt	--	XP_026302029.1 peroxidasin [Apis mellifera]	-	-	-	-	-	-	-
miR-281-x	XM_026446287.1	1484	1504	-14.89	aTCTCTCG-TCGGTccacagta	x|||||||x|x|||xxxxxxxx	aAGAGAGCTATCCAtcgacagt	bab2	XP_026302072.1 protein bric-a-brac 2 isoform X3 [Apis mellifera]	-	-	-	-	GO:0000124//SAGA complex;GO:0005672//transcription factor TFIIA complex	GO:0003677//DNA binding;GO:0003712//transcription cofactor activity;GO:0005515//protein binding	GO:0006367//transcription initiation from RNA polymerase II promoter
miR-281-x	XM_026446288.1	1484	1504	-14.89	aTCTCTCG-TCGGTccacagta	x|||||||x|x|||xxxxxxxx	aAGAGAGCTATCCAtcgacagt	bab2	XP_026302073.1 protein bric-a-brac 2 isoform X4 [Apis mellifera]	-	-	-	-	GO:0000124//SAGA complex;GO:0005672//transcription factor TFIIA complex	GO:0003677//DNA binding;GO:0003712//transcription cofactor activity;GO:0005515//protein binding	GO:0006367//transcription initiation from RNA polymerase II promoter
miR-281-x	XM_026446306.1	2523	2544	-14.43	tTCTCTCGTCGCGTGtaaaggc	x|||||||xx:x||:xxxxxxx	aAGAGAGCTATCCATcgacagt	--	XP_026302091.1 fibroblast growth factor 17-like isoform X1 [Apis mellifera]	Human Diseases;Environmental Information Processing;Environmental Information Processing;Environmental Information Processing;Environmental Information Processing;Cellular Processes;Human Diseases;Human Diseases;Human Diseases	Cancers;Signal transduction;Signal transduction;Signal transduction;Signal transduction;Cell motility;Cancers;Cancers;Cancers	ko05200//Pathways in cancer;ko04010//MAPK signaling pathway;ko04151//PI3K-Akt signaling pathway;ko04014//Ras signaling pathway;ko04015//Rap1 signaling pathway;ko04810//Regulation of actin cytoskeleton;ko05226//Gastric cancer;ko05224//Breast cancer;ko05218//Melanoma	K04358;K04358;K04358;K04358;K04358;K04358;K04358;K04358;K04358	GO:0000813//ESCRT I complex	GO:0008083//growth factor activity	-
miR-281-x	XM_026446307.1	2523	2544	-14.43	tTCTCTCGTCGCGTGtaaaggc	x|||||||xx:x||:xxxxxxx	aAGAGAGCTATCCATcgacagt	--	XP_026302092.1 fibroblast growth factor 17-like isoform X2 [Apis mellifera]	Human Diseases;Environmental Information Processing;Environmental Information Processing;Environmental Information Processing;Environmental Information Processing;Cellular Processes;Human Diseases;Human Diseases;Human Diseases	Cancers;Signal transduction;Signal transduction;Signal transduction;Signal transduction;Cell motility;Cancers;Cancers;Cancers	ko05200//Pathways in cancer;ko04010//MAPK signaling pathway;ko04151//PI3K-Akt signaling pathway;ko04014//Ras signaling pathway;ko04015//Rap1 signaling pathway;ko04810//Regulation of actin cytoskeleton;ko05226//Gastric cancer;ko05224//Breast cancer;ko05218//Melanoma	K04358;K04358;K04358;K04358;K04358;K04358;K04358;K04358;K04358	GO:0000813//ESCRT I complex	GO:0008083//growth factor activity	-
miR-281-x	XM_026446308.1	2523	2544	-14.43	tTCTCTCGTCGCGTGtaaaggc	x|||||||xx:x||:xxxxxxx	aAGAGAGCTATCCATcgacagt	--	XP_026302093.1 fibroblast growth factor 17-like isoform X3 [Apis mellifera]	Human Diseases;Environmental Information Processing;Environmental Information Processing;Environmental Information Processing;Environmental Information Processing;Cellular Processes;Human Diseases;Human Diseases;Human Diseases	Cancers;Signal transduction;Signal transduction;Signal transduction;Signal transduction;Cell motility;Cancers;Cancers;Cancers	ko05200//Pathways in cancer;ko04010//MAPK signaling pathway;ko04151//PI3K-Akt signaling pathway;ko04014//Ras signaling pathway;ko04015//Rap1 signaling pathway;ko04810//Regulation of actin cytoskeleton;ko05226//Gastric cancer;ko05224//Breast cancer;ko05218//Melanoma	K04358;K04358;K04358;K04358;K04358;K04358;K04358;K04358;K04358	GO:0000813//ESCRT I complex	GO:0008083//growth factor activity	-
miR-281-x	XM_026446309.1	2523	2544	-14.43	tTCTCTCGTCGCGTGtaaaggc	x|||||||xx:x||:xxxxxxx	aAGAGAGCTATCCATcgacagt	--	XP_026302094.1 fibroblast growth factor 17-like isoform X4 [Apis mellifera]	Human Diseases;Environmental Information Processing;Environmental Information Processing;Environmental Information Processing;Environmental Information Processing;Cellular Processes;Human Diseases;Human Diseases;Human Diseases	Cancers;Signal transduction;Signal transduction;Signal transduction;Signal transduction;Cell motility;Cancers;Cancers;Cancers	ko05200//Pathways in cancer;ko04010//MAPK signaling pathway;ko04151//PI3K-Akt signaling pathway;ko04014//Ras signaling pathway;ko04015//Rap1 signaling pathway;ko04810//Regulation of actin cytoskeleton;ko05226//Gastric cancer;ko05224//Breast cancer;ko05218//Melanoma	K04358;K04358;K04358;K04358;K04358;K04358;K04358;K04358;K04358	GO:0000813//ESCRT I complex	GO:0008083//growth factor activity	-
miR-281-x	XM_026446310.1	2523	2544	-14.43	tTCTCTCGTCGCGTGtaaaggc	x|||||||xx:x||:xxxxxxx	aAGAGAGCTATCCATcgacagt	--	XP_026302095.1 fibroblast growth factor 17-like isoform X5 [Apis mellifera]	Human Diseases;Environmental Information Processing;Environmental Information Processing;Environmental Information Processing;Environmental Information Processing;Cellular Processes;Human Diseases;Human Diseases;Human Diseases	Cancers;Signal transduction;Signal transduction;Signal transduction;Signal transduction;Cell motility;Cancers;Cancers;Cancers	ko05200//Pathways in cancer;ko04010//MAPK signaling pathway;ko04151//PI3K-Akt signaling pathway;ko04014//Ras signaling pathway;ko04015//Rap1 signaling pathway;ko04810//Regulation of actin cytoskeleton;ko05226//Gastric cancer;ko05224//Breast cancer;ko05218//Melanoma	K04358;K04358;K04358;K04358;K04358;K04358;K04358;K04358;K04358	GO:0000813//ESCRT I complex	GO:0008083//growth factor activity	-
miR-281-x	XM_026446340.1	1910	1931	-16.33	gTCTCTCGAGATGAAcagcagg	x||||||||x|x|x|xxxxxxx	aAGAGAGCTATCCATcgacagt	Elavl2	XP_006571228.1 ELAV-like protein 3 isoform X1 [Apis mellifera]	-	-	-	-	GO:0005634//nucleus;GO:0005737//cytoplasm	GO:0003676//nucleic acid binding;GO:0003723//RNA binding;GO:0004535//poly(A)-specific ribonuclease activity;GO:0046872//metal ion binding	GO:0006402//mRNA catabolic process;GO:0008380//RNA splicing
miR-281-x	XM_391850.6	2292	2311	-23.99	cTCTCTCGA-AGG-ATCTGTct	x||||||||x|||x|x||||xx	aAGAGAGCTATCCATCGACAgt	PNP	XP_391850.3 purine nucleoside phosphorylase isoform X1 [Apis mellifera]	Metabolism;Metabolism;Metabolism;Metabolism	Global and overview maps;Nucleotide metabolism;Nucleotide metabolism;Metabolism of cofactors and vitamins	ko01100//Metabolic pathways;ko00230//Purine metabolism;ko00240//Pyrimidine metabolism;ko00760//Nicotinate and nicotinamide metabolism	K03783;K03783;K03783;K03783	GO:0005576//extracellular region	GO:0000772//mating pheromone activity;GO:0003824//catalytic activity;GO:0004731//purine-nucleoside phosphorylase activity;GO:0008782//adenosylhomocysteine nucleosidase activity;GO:0008930//methylthioadenosine nucleosidase activity;GO:0017061//S-methyl-5-thioadenosine phosphorylase activity	GO:0006139//nucleobase-containing compound metabolic process;GO:0006168//adenine salvage;GO:0009116//nucleoside metabolic process;GO:0019509//L-methionine biosynthetic process from methylthioadenosine;GO:0019953//sexual reproduction
miR-281-x	XM_391879.7	130	151	-12.29	cTCTCTCGACAacctactcccc	x||||||||x|xxxxxxxxxxx	aAGAGAGCTATccatcgacagt	--	XP_391879.2 uncharacterized protein LOC408327 [Apis mellifera]	-	-	-	-	-	-	-
miR-281-x	XM_391922.5	1216	1239	-14.97	gTCTCTCGGGTTCAAAGTATGTac	x|||||||:x|xxxx||:x|||xx	aAGAGAGCT-ATCCATCG-ACAgt	pi4kb	XP_391922.2 phosphatidylinositol 4-kinase beta [Apis mellifera]	Metabolism;Environmental Information Processing;Metabolism	Global and overview maps;Signal transduction;Carbohydrate metabolism	ko01100//Metabolic pathways;ko04070//Phosphatidylinositol signaling system;ko00562//Inositol phosphate metabolism	K19801;K19801;K19801	GO:0005737//cytoplasm;GO:1990904//ribonucleoprotein complex	GO:0000166//nucleotide binding;GO:0005524//ATP binding;GO:0016709//oxidoreductase activity, acting on paired donors, with incorporation or reduction of molecular oxygen, NAD(P)H as one donor, and incorporation of one atom of oxygen;GO:0016879//ligase activity, forming carbon-nitrogen bonds	GO:0000372//Group I intron splicing;GO:0006400//tRNA modification;GO:0006744//ubiquinone biosynthetic process;GO:0008033//tRNA processing
miR-281-x	XM_392082.7	525	547	-25.92	cTCTCTCGCTGGGAAAGCTGTgc	x|||||||x|:||x|x|||||xx	aAGAGAGCTATCCAT-CGACAgt	ACE	XP_392082.3 angiotensin-converting enzyme isoform X2 [Apis mellifera]	Human Diseases;Organismal Systems;Human Diseases;Organismal Systems	Cardiovascular diseases;Endocrine system;Infectious diseases;Endocrine system	ko05410//Hypertrophic cardiomyopathy (HCM);ko04924//Renin secretion;ko05142//Chagas disease (American trypanosomiasis);ko04614//Renin-angiotensin system	K01283;K01283;K01283;K01283	GO:0016020//membrane	GO:0008237//metallopeptidase activity;GO:0008241//peptidyl-dipeptidase activity	GO:0006508//proteolysis
miR-281-x	XM_392157.6	2132	2152	-12.9	aTCTCTCGACAC-TACTTcaaa	x||||||||x|xx||x:|xxxx	aAGAGAGCTATCCATCGAcagt	TEAD1	XP_392157.3 transcriptional enhancer factor TEF-1 isoform X5 [Apis mellifera]	Environmental Information Processing;Environmental Information Processing;Environmental Information Processing	Signal transduction;Signal transduction;Signal transduction	ko04390//Hippo signaling pathway;ko04391//Hippo signaling pathway -fly;ko04392//Hippo signaling pathway - multiple species	K09448;K09448;K09448	-	GO:0003700//transcription factor activity, sequence-specific DNA binding	GO:0006355//regulation of transcription, DNA-templated
miR-281-x	XM_392202.7	3024	3044	-18.85	tTCTCTCGGTGAGC-GCTATta	x|||||||:|:x|xx|||x|xx	aAGAGAGCTATCCATCGACAgt	HIPK2	XP_392202.5 homeodomain-interacting protein kinase 2 isoform X2 [Apis mellifera]	Cellular Processes	Cell growth and death	ko04218//Cellular senescence	K08826	-	GO:0004672//protein kinase activity;GO:0005524//ATP binding	GO:0006468//protein phosphorylation
miR-281-x	XM_392257.7	1235	1256	-23.88	cTCTCTCGGTGTTTGGCTCTcg	x|||||||:|:xx|:|||x|xx	aAGAGAGCTATCCATCGACAgt	nrv2	XP_392257.1 sodium/potassium-transporting ATPase subunit beta-2 [Apis mellifera]	Environmental Information Processing;Organismal Systems;Environmental Information Processing;Organismal Systems;Organismal Systems;Organismal Systems;Organismal Systems;Organismal Systems;Organismal Systems;Organismal Systems;Organismal Systems;Organismal Systems;Organismal Systems;Organismal Systems;Organismal Systems;Organismal Systems;Organismal Systems;Organismal Systems	Signal transduction;Circulatory system;Signal transduction;Endocrine system;Endocrine system;Digestive system;Endocrine system;Circulatory system;Digestive system;Digestive system;Digestive system;Digestive system;Excretory system;Endocrine system;Digestive system;Excretory system;Digestive system;Excretory system	ko04024//cAMP signaling pathway;ko04261//Adrenergic signaling in cardiomyocytes;ko04022//cGMP - PKG signaling pathway;ko04911//Insulin secretion;ko04919//Thyroid hormone signaling pathway;ko04972//Pancreatic secretion;ko04925//Aldosterone synthesis and secretion;ko04260//Cardiac muscle contraction;ko04974//Protein digestion and absorption;ko04971//Gastric acid secretion;ko04970//Salivary secretio…	K01540;K01540;K01540;K01540;K01540;K01540;K01540;K01540;K01540;K01540;K01540;K01540;K01540;K01540;K01540;K01540;K01540;K01540	GO:0005890//sodium:potassium-exchanging ATPase complex	GO:0005391//sodium:potassium-exchanging ATPase activity	GO:0006813//potassium ion transport;GO:0006814//sodium ion transport;GO:0030322//stabilization of membrane potential
miR-281-x	XM_392346.7	783	807	-13.92	aTCTCTCGTGTCAAGGAAaaagaaa	x|||||||x:|xx|||x|xxxxxxx	aAGAGAGC-TA--TCCATcgacagt	Msh6	XP_392346.4 probable DNA mismatch repair protein Msh6 [Apis mellifera]	Human Diseases;Human Diseases;Human Diseases;Genetic Information Processing	Cancers;Cancers;Drug resistance;Replication and repair	ko05200//Pathways in cancer;ko05210//Colorectal cancer;ko01524//Platinum drug resistance;ko03430//Mismatch repair	K08737;K08737;K08737;K08737	-	GO:0005524//ATP binding;GO:0030983//mismatched DNA binding	GO:0006259//DNA metabolic process;GO:0006298//mismatch repair
miR-281-x	XM_392379.6	23	45	-11.4	tTCTCTCGTATTGaaaataatac	x|||||||x||x|xxxxxxxxxx	aAGAGAGC-TATCcatcgacagt	Lgals4	XP_392379.2 protein enabled [Apis mellifera]	-	-	-	-	-	GO:0030246//carbohydrate binding	-
miR-281-x	XM_392407.7	2368	2387	-17.34	tTCTCTCG-TAGC-AGCcaagt	x|||||||x|||xx|||xxxxx	aAGAGAGCTATCCATCGacagt	mam	XP_392407.6 neurogenic protein mastermind isoform X1 [Apis mellifera]	Human Diseases;Environmental Information Processing;Organismal Systems	Infectious diseases;Signal transduction;Immune system	ko05165//Human papillomavirus infection;ko04330//Notch signaling pathway;ko04658//Th1 and Th2 cell differentiation	K06061;K06061;K06061	GO:0016607//nuclear speck	GO:0003713//transcription coactivator activity	GO:0007219//Notch signaling pathway;GO:0045944//positive regulation of transcription from RNA polymerase II promoter
miR-281-x	XM_392414.7	629	648	-19.27	aTCTCTCGA-AG-TGGCcacag	x||||||||x||x|:||xxxxx	aAGAGAGCTATCCATCGacagt	sox6	XP_392414.6 transcription factor SOX-5 isoform X1 [Apis mellifera]	-	-	-	-	GO:0016020//membrane	-	-
miR-281-x	XM_392443.7	11407	11428	-14.36	gTCTCTCGCTctccagagcgcg	x|||||||x|xxxxxxxxxxxx	aAGAGAGCTAtccatcgacagt	cpo	XP_003488500.1 protein couch potato isoform X1 [Bombus impatiens]	-	-	-	-	-	GO:0003676//nucleic acid binding	GO:0008380//RNA splicing
miR-281-x	XM_392530.7	4168	4189	-13.56	tTCTCTCGGTcctctttttact	x|||||||:|xxxxxxxxxxxx	aAGAGAGCTAtccatcgacagt	--	XP_392530.3 cell adhesion molecule 2 isoform X1 [Apis mellifera]	-	-	-	-	-	-	-
miR-281-x	XM_392668.7	1613	1634	-13.13	cTCTCTCGTTTGCTCTTTGagc	x|||||||x|x|x|xx:||xxx	aAGAGAGCTATCCATCGACagt	SLC6A17	XP_392668.2 sodium- and chloride-dependent transporter XTRP3 isoform X2 [Apis mellifera]	-	-	-	-	GO:0016021//integral component of membrane	-	-
miR-281-x	XM_392877.7	62	83	-11.4	tTCTCTCGTTtaacattaacaa	x|||||||x|xxxxxxxxxxxx	aAGAGAGCTAtccatcgacagt	FEZ2	XP_006619106.1 fasciculation and elongation protein zeta-2 [Apis dorsata]	-	-	-	-	-	-	-
miR-281-x	XM_393141.7	363	385	-15.42	aTCTCTCGAGATTTGGACTTTag	x||||||||x|xx|:|x||x|xx	aAGAGAGCTATCCATC-GACAgt	fax	XP_016912717.1 failed axon connections [Apis cerana]	-	-	-	-	GO:0001401//mitochondrial sorting and assembly machinery complex	GO:0005515//protein binding	GO:0006383//transcription from RNA polymerase III promoter;GO:0006749//glutathione metabolic process
miR-281-x	XM_393267.7	1304	1323	-12.97	cTCTCTCGA--GTTAATTtaga	x||||||||xx|x||x:|xxxx	aAGAGAGCTATCCATCGAcagt	Cow	XP_393267.5 proteoglycan Cow [Apis mellifera]	-	-	-	-	-	GO:0005509//calcium ion binding;GO:0005515//protein binding	-
miR-281-x	XM_393493.6	108	130	-25.19	gTCTCTCGGTGTGGTAGTAGaaa	x|||||||:|:x|||||:x|xxx	aAGAGAGCTAT-CCATCGACagt	gnt14	XP_393493.3 beta-1,4-glucuronyltransferase 1 [Apis mellifera]	Metabolism;Metabolism	Global and overview maps;Glycan biosynthesis and metabolism	ko01100//Metabolic pathways;ko00515//Mannose type O-glycan biosyntheis	K21032;K21032	-	-	-
miR-281-x	XM_393520.7	936	957	-12.72	aTCTCTCGtcaactgaaggcca	x|||||||xxxxxxxxxxxxxx	aAGAGAGCtatccatcgacagt	sog	XP_393520.4 dorsal-ventral patterning protein Sog isoform X2 [Apis mellifera]	Environmental Information Processing	Signal transduction	ko04350//TGF-beta signaling pathway	K04657	-	GO:0005515//protein binding	-
miR-281-x	XM_393603.7	355	379	-12.53	gTCTCTCGTTCTTTTGAAGATGTtc	x|||||||x|xxx|xxx||x|||xx	aAGAGAGCTATCCA---TCGACAgt	TXN2	XP_393603.1 thioredoxin, mitochondrial [Apis mellifera]	Human Diseases;Human Diseases;Organismal Systems	Infectious diseases;Cardiovascular diseases;Immune system	ko05132//Salmonella infection;ko05418//Fluid shear stress and atherosclerosis;ko04621//NOD-like receptor signaling pathway	K03671;K03671;K03671	GO:0005737//cytoplasm	GO:0003756//protein disulfide isomerase activity;GO:0015036//disulfide oxidoreductase activity;GO:0016209//antioxidant activity;GO:0016491//oxidoreductase activity	GO:0006457//protein folding;GO:0055114//oxidation-reduction process
miR-281-x	XM_393604.7	628	649	-12.8	aTCTCTCGATtttgaattaaat	x|||||||||xxxxxxxxxxxx	aAGAGAGCTAtccatcgacagt	TXNDC11	XP_393604.4 thioredoxin domain-containing protein 11 [Apis mellifera]	-	-	-	-	GO:0005737//cytoplasm	GO:0003756//protein disulfide isomerase activity;GO:0015036//disulfide oxidoreductase activity;GO:0015926//glucosidase activity;GO:0016667//oxidoreductase activity, acting on a sulfur group of donors	GO:0006457//protein folding;GO:0006790//sulfur compound metabolic process;GO:0055114//oxidation-reduction process
miR-281-x	XM_393817.7	393	414	-11.14	cTCTCTCGTTttcacttttcaa	x|||||||x|xxxxxxxxxxxx	aAGAGAGCTAtccatcgacagt	Dpp6	XP_016770208.1 dipeptidyl aminopeptidase-like protein 6 isoform X1 [Apis mellifera]	-	-	-	-	-	GO:0008236//serine-type peptidase activity;GO:0016787//hydrolase activity	GO:0006508//proteolysis
miR-281-x	XM_393966.5	182	203	-13.49	cTCTCTCGtcctcgcttcctct	x|||||||xxxxxxxxxxxxxx	aAGAGAGCtatccatcgacagt	--	XP_393966.1 uncharacterized protein LOC410487 [Apis mellifera]	-	-	-	-	-	GO:0003677//DNA binding	-
miR-281-x	XM_394056.7	89	111	-16.12	tTCTCTCGCATAAGGAaaaaaga	x|||||||x|||x|x|xxxxxxx	aAGAGAGC-TATCCATcgacagt	Slc6a5	XP_394056.4 sodium- and chloride-dependent glycine transporter 2 isoform X2 [Apis mellifera]	Organismal Systems	Nervous system	ko04721//Synaptic vesicle cycle	K05038	GO:0016021//integral component of membrane	-	-
miR-281-x	XM_394109.6	3421	3442	-12.8	aTCTCTCGATtaatctaaaata	x|||||||||xxxxxxxxxxxx	aAGAGAGCTAtccatcgacagt	Gprk2	XP_006609289.1 G protein-coupled receptor kinase 2 isoform X1 [Apis dorsata]	Cellular Processes;Organismal Systems;Human Diseases;Environmental Information Processing	Transport and catabolism;Immune system;Substance dependence;Signal transduction	ko04144//Endocytosis;ko04062//Chemokine signaling pathway;ko05032//Morphine addiction;ko04341//Hedgehog signaling pathway - fly	K08291;K08291;K08291;K08291	-	GO:0004672//protein kinase activity;GO:0005524//ATP binding	GO:0006468//protein phosphorylation
miR-281-x	XM_394163.6	7243	7264	-20.96	tTCTCTCGGTCGGgcccgctcc	x|||||||:|x||xxxxxxxxx	aAGAGAGCTATCCatcgacagt	Sema1a	XP_394163.3 semaphorin-1A isoform X1 [Apis mellifera]	-	-	-	-	GO:0005886//plasma membrane	GO:0005515//protein binding	GO:0043065//positive regulation of apoptotic process
miR-281-x	XM_394314.7	81	101	-13.46	cTCTCTCGC-AGGccaaatctt	x|||||||xx|||xxxxxxxxx	aAGAGAGCTATCCatcgacagt	UBE2R2	XP_003402655.1 ubiquitin-conjugating enzyme E2 R2 isoform X1 [Bombus terrestris]	Genetic Information Processing	Folding, sorting and degradation	ko04120//Ubiquitin mediated proteolysis	K02207	-	GO:0005515//protein binding	-
miR-281-x	XM_394328.7	1	14	-14.14	cTCTCTCGG-AGcag-------	x|||||||:x||xxxxxxxxxx	aAGAGAGCTATCcatcgacagt	feh-1	XP_006569154.1 protein Fe65 homolog isoform X3 [Apis mellifera]	-	-	-	-	-	GO:0005515//protein binding	-
miR-281-x	XM_394424.6	378	402	-15.8	tTCTCTCGTCTGAATATATTTGTct	x|||||||xxx:x|xx||x:|||xx	aAGAGAGC---TATCCATCGACAgt	tdc-1	XP_006560966.1 aromatic-L-amino-acid decarboxylase isoform X1 [Apis mellifera]	Metabolism;Metabolism	Global and overview maps;Amino acid metabolism	ko01100//Metabolic pathways;ko00350//Tyrosine metabolism	K22329;K22329	-	GO:0004351//glutamate decarboxylase activity;GO:0004837//tyrosine decarboxylase activity;GO:0016740//transferase activity;GO:0016829//lyase activity;GO:0016831//carboxy-lyase activity;GO:0030170//pyridoxal phosphate binding	GO:0006520//cellular amino acid metabolic process;GO:0006540//glutamate decarboxylation to succinate;GO:0015940//pantothenate biosynthetic process;GO:0019752//carboxylic acid metabolic process;GO:0051188//cofactor biosynthetic process
miR-281-x	XM_394471.5	42	63	-11.61	tTCTCTCGtccttcttcctcgg	x|||||||xxxxxxxxxxxxxx	aAGAGAGCtatccatcgacagt	TUB-2	XP_003689987.1 tubulin beta chain [Apis florea]	Human Diseases;Human Diseases;Human Diseases;Cellular Processes;Cellular Processes	Neurodegenerative diseases;Neurodegenerative diseases;Infectious diseases;Transport and catabolism;Cellular community - eukaryotes	ko05010//Alzheimer disease;ko05016//Huntington disease;ko05130//Pathogenic Escherichia coli infection;ko04145//Phagosome;ko04540//Gap junction	K07375;K07375;K07375;K07375;K07375	-	GO:0003924//GTPase activity	GO:0000910//cytokinesis
miR-281-x	XM_394673.7	1383	1404	-14.25	tTCTCTCGATCCCTACCccgat	x|||||||||xxx||x|xxxxx	aAGAGAGCTATCCATCGacagt	SLC6A15	XP_394673.4 sodium-dependent neutral amino acid transporter B(0)AT3 [Apis mellifera]	-	-	-	-	GO:0016021//integral component of membrane	-	-
miR-281-x	XM_395161.6	40	61	-13.3	aTCTCTCGccgcaaccgccgca	x|||||||xxxxxxxxxxxxxx	aAGAGAGCtatccatcgacagt	KCNIP1	XP_006617637.1 Kv channel-interacting protein 1 [Apis dorsata]	-	-	-	-	-	GO:0004553//hydrolase activity, hydrolyzing O-glycosyl compounds;GO:0005509//calcium ion binding;GO:0005515//protein binding	GO:0000272//polysaccharide catabolic process
miR-281-x	XM_396291.6	461	482	-14.42	cTCTCTCGtccttaaagcagaa	x|||||||xxxxxxxxxxxxxx	aAGAGAGCtatccatcgacagt	caup	XP_026299505.1 iroquois-class homeodomain protein IRX-6 isoform X3 [Apis mellifera]	-	-	-	-	-	GO:0003677//DNA binding	GO:0006355//regulation of transcription, DNA-templated
miR-281-x	XM_396407.6	1954	1976	-10.77	aTCTCTCGCATAcatctatacat	x|||||||x|||xxxxxxxxxxx	aAGAGAGC-TATccatcgacagt	Hs3st5	XP_006569299.1 heparan sulfate glucosamine 3-O-sulfotransferase 1 isoform X2 [Apis mellifera]	Metabolism	Glycan biosynthesis and metabolism	ko00534//Glycosaminoglycan biosynthesis - heparan sulfate / heparin	K08104	GO:0000124//SAGA complex;GO:0016021//integral component of membrane	GO:0003712//transcription cofactor activity;GO:0008146//sulfotransferase activity	-
miR-281-x	XM_396491.6	1909	1930	-14.22	cTCTCTCGcctttcttaaggct	x|||||||xxxxxxxxxxxxxx	aAGAGAGCtatccatcgacagt	Gpr52	XP_016768310.1 G-protein coupled receptor 52 [Apis mellifera]	-	-	-	-	GO:0016020//membrane;GO:0016021//integral component of membrane	GO:0004930//G-protein coupled receptor activity	GO:0007186//G-protein coupled receptor signaling pathway;GO:0043269//regulation of ion transport
miR-281-x	XM_396503.7	7	28	-13.32	gTCTCTCGAcgaaaaaagtgta	x||||||||xxxxxxxxxxxxx	aAGAGAGCTatccatcgacagt	Tnk2	XP_016768956.2 uncharacterized protein LOC413052 [Apis mellifera]	-	-	-	-	-	GO:0004672//protein kinase activity;GO:0005515//protein binding;GO:0005524//ATP binding	GO:0006468//protein phosphorylation
miR-281-x	XM_397008.5	555	576	-13.18	tTCTCTCGGgtttttttttttg	x|||||||:xxxxxxxxxxxxx	aAGAGAGCTatccatcgacagt	Dcxr	XP_397008.1 L-xylulose reductase [Apis mellifera]	Metabolism;Metabolism	Global and overview maps;Carbohydrate metabolism	ko01100//Metabolic pathways;ko00040//Pentose and glucuronate interconversions	K03331;K03331	-	GO:0003824//catalytic activity;GO:0004316//3-oxoacyl-[acyl-carrier-protein] reductase (NADPH) activity;GO:0004488//methylenetetrahydrofolate dehydrogenase (NADP+) activity;GO:0004757//sepiapterin reductase activity;GO:0008667//2,3-dihydro-2,3-dihydroxybenzoate dehydrogenase activity;GO:0008678//2-deoxy-D-gluconate 3-dehydrogenase activity;GO:0008831//dTDP-4-dehydrorhamnose reductase activity;GO:0…	GO:0000272//polysaccharide catabolic process;GO:0006633//fatty acid biosynthetic process;GO:0006729//tetrahydrobiopterin biosynthetic process;GO:0006813//potassium ion transport;GO:0009243//O antigen biosynthetic process;GO:0019305//dTDP-rhamnose biosynthetic process;GO:0055114//oxidation-reduction process
miR-281-x	XM_397118.7	289	308	-14.61	aTCTCTCGATA--TACTTTTat	x||||||||||xx||x:|x|xx	aAGAGAGCTATCCATCGACAgt	ARHGEF10	XP_006570095.2 rho guanine nucleotide exchange factor 10-like protein isoform X1 [Apis mellifera]	-	-	-	-	-	GO:0005085//guanyl-nucleotide exchange factor activity;GO:0008705//methionine synthase activity	GO:0009086//methionine biosynthetic process
miR-281-x	XM_623076.6	228	251	-10.62	aTCTCTCGTGACAGATtttgacgc	x|||||||xx|x||x|xxxxxxxx	aAGAGAGC--TATCCAtcgacagt	ost-1	XP_006562631.2 SPARC [Apis mellifera]	-	-	-	-	-	GO:0005509//calcium ion binding;GO:0005515//protein binding	-
miR-281-x	XM_623900.5	294	315	-12.16	tTCTCTCGTTTGTTTTTTTTtt	x|||||||x|x|x|xx:|x|xx	aAGAGAGCTATCCATCGACAgt	Scr	XP_026301502.1 homeobox protein H55 [Apis mellifera]	-	-	-	-	-	GO:0003677//DNA binding	-
miR-281-x	XM_624748.5	1915	1935	-13.79	aTCTCTCG-TAACCATATGTta	x|||||||x||xxx|xx|||xx	aAGAGAGCTATCCATCGACAgt	Wnt4	XP_012341801.1 protein Wnt-1-like isoform X1 [Apis florea]	Human Diseases;Human Diseases;Human Diseases;Environmental Information Processing;Human Diseases;Human Diseases;Organismal Systems;Environmental Information Processing;Organismal Systems;Environmental Information Processing;Human Diseases;Organismal Systems;Cellular Processes;Human Diseases;Human Diseases;Human Diseases	Cancers;Neurodegenerative diseases;Infectious diseases;Signal transduction;Endocrine and metabolic diseases;Cancers;Development;Signal transduction;Endocrine system;Signal transduction;Cancers;Endocrine system;Cellular community - eukaryotes;Cancers;Cancers;Cancers	ko05200//Pathways in cancer;ko05010//Alzheimer disease;ko05165//Human papillomavirus infection;ko04310//Wnt signaling pathway;ko04934//Cushing syndrome;ko05205//Proteoglycans in cancer;ko04360//Axon guidance;ko04390//Hippo signaling pathway;ko04919//Thyroid hormone signaling pathway;ko04150//mTOR signaling pathway;ko05225//Hepatocellular carcinoma;ko04916//Melanogenesis;ko04550//Signaling pathway…	K00408;K00408;K00408;K00408;K00408;K00408;K00408;K00408;K00408;K00408;K00408;K00408;K00408;K00408;K00408;K00408	GO:0005576//extracellular region	GO:0005102//receptor binding	GO:0007275//multicellular organism development;GO:0016055//Wnt signaling pathway

## Sheet: ame-miR-1-3p
miRNA	target	target_start	target_end	energy(kcal/mol)	target_region(3'->5')	mirna-target_pairing(5'->3')	miRNA_sequence(5'->3')	Symbol	Description	KEGG_A_class	KEGG_B_class	Pathway	K_ID	GO Component	GO Function	GO Process
ame-miR-1-3p	NM_001011634.2	903	924	-19.53	aCCTTACATTTTTTTtcgaaca	x||||||||||:||:xxxxxxx	tGGAATGTAAAGAAGtatggag	rxraa	NP_001011634.1 ultraspiracle [Apis mellifera]	Cellular Processes	Cell growth and death	ko04214//Apoptosis - fly	K14030	-	GO:0003700//transcription factor activity, sequence-specific DNA binding;GO:0008270//zinc ion binding;GO:0043565//sequence-specific DNA binding	GO:0006355//regulation of transcription, DNA-templated
ame-miR-1-3p	NM_001077808.1	1222	1243	-12.31	aCCTTACATaaagaaaaaaagc	x||||||||xxxxxxxxxxxxx	tGGAATGTAaagaagtatggag	Adcy3	NP_001071276.1 adenylate cyclase 3 [Apis mellifera]	Metabolism;Human Diseases;Environmental Information Processing;Organismal Systems;Environmental Information Processing;Human Diseases;Human Diseases;Organismal Systems;Environmental Information Processing;Organismal Systems;Organismal Systems;Human Diseases;Organismal Systems;Metabolism;Environmental Information Processing;Organismal Systems;Organismal Systems;Organismal Systems;Organismal System…	Global and overview maps;Cancers;Signal transduction;Circulatory system;Signal transduction;Infectious diseases;Endocrine and metabolic diseases;Environmental adaptation;Signal transduction;Endocrine system;Endocrine system;Infectious diseases;Digestive system;Nucleotide metabolism;Signal transduction;Nervous system;Endocrine system;Circulatory system;Nervous system;Cell growth and death;Signal t…	ko01100//Metabolic pathways;ko05200//Pathways in cancer;ko04024//cAMP signaling pathway;ko04261//Adrenergic signaling in cardiomyocytes;ko04020//Calcium signaling pathway;ko05166//HTLV-I infection;ko04934//Cushing syndrome;ko04714//Thermogenesis;ko04022//cGMP - PKG signaling pathway;ko04911//Insulin secretion;ko04921//Oxytocin signaling pathway;ko05163//Human cytomegalovirus infection;ko04972//Pa…	K08043;K08043;K08043;K08043;K08043;K08043;K08043;K08043;K08043;K08043;K08043;K08043;K08043;K08043;K08043;K08043;K08043;K08043;K08043;K08043;K08043;K08043;K08043;K08043;K08043;K08043;K08043;K08043;K08043;K08043;K08043;K08043;K08043;K08043;K08043;K08043;K08043;K08043;K08043;K08043;K08043;K08043;K08043;K08043;K08043;K08043;K08043;K08043;K08043;K08043;K08043	-	GO:0004383//guanylate cyclase activity	GO:0006182//cGMP biosynthetic process;GO:0009190//cyclic nucleotide biosynthetic process;GO:0035556//intracellular signal transduction
ame-miR-1-3p	NM_001134668.1	92	113	-16.29	aCCTTACAcactgtgacgtcag	x|||||||xxxxxxxxxxxxxx	tGGAATGTaaagaagtatggag	USP1	PBC27274.1 Ubiquitin carboxyl-terminal hydrolase [Apis cerana cerana]	Genetic Information Processing	Replication and repair	ko03460//Fanconi anemia pathway	K11832	-	GO:0004843//thiol-dependent ubiquitin-specific protease activity	GO:0016579//protein deubiquitination
ame-miR-1-3p	XM_001120297.5	329	349	-15.45	aCCTTACACGTAT-CGTAaaga	x|||||||xx|x|x|:||xxxx	tGGAATGTAAAGAAGTATggag	Atp2c1	XP_001120297.2 calcium-transporting ATPase type 2C member 1 [Apis mellifera]	-	-	-	-	GO:0031004//potassium ion-transporting ATPase complex	GO:0004008//copper-exporting ATPase activity;GO:0004647//phosphoserine phosphatase activity;GO:0005375//copper ion transmembrane transporter activity;GO:0005388//calcium-transporting ATPase activity;GO:0008556//potassium-transporting ATPase activity;GO:0008967//phosphoglycolate phosphatase activity;GO:0015434//cadmium-transporting ATPase activity;GO:0015444//magnesium-importing ATPase activity;GO…	GO:0006545//glycine biosynthetic process;GO:0006564//L-serine biosynthetic process;GO:0006813//potassium ion transport;GO:0006816//calcium ion transport;GO:0006825//copper ion transport;GO:0008152//metabolic process;GO:0009853//photorespiration;GO:0015691//cadmium ion transport;GO:0015693//magnesium ion transport;GO:0030001//metal ion transport;GO:0043094//cellular metabolic compound salvage
ame-miR-1-3p	XM_001120306.5	824	845	-15.08	aCCTTACAATATGTTCA-ACatt	x|||||||x|x|x||||x||xxx	tGGAATGTAA-AGAAGTATGgag	Srm	XP_001120306.1 spermidine synthase isoform X1 [Apis mellifera]	Metabolism;Metabolism;Metabolism;Metabolism	Global and overview maps;Amino acid metabolism;Metabolism of other amino acids;Amino acid metabolism	ko01100//Metabolic pathways;ko00270//Cysteine and methionine metabolism;ko00480//Glutathione metabolism;ko00330//Arginine and proline metabolism	K00797;K00797;K00797;K00797	-	GO:0000179//rRNA (adenine-N6,N6-)-dimethyltransferase activity;GO:0004766//spermidine synthase activity;GO:0008168//methyltransferase activity;GO:0008171//O-methyltransferase activity;GO:0008173//RNA methyltransferase activity;GO:0008276//protein methyltransferase activity;GO:0008757//S-adenosylmethionine-dependent methyltransferase activity	GO:0000154//rRNA modification;GO:0006412//translation;GO:0008295//spermidine biosynthetic process;GO:0016051//carbohydrate biosynthetic process;GO:0018364//peptidyl-glutamine methylation;GO:0042245//RNA repair;GO:0042273//ribosomal large subunit biogenesis
ame-miR-1-3p	XM_001120757.5	2680	2704	-17.32	tCCTTACAGTAGCCTTCAATGCggc	x|||||||x|xxx|||||x|:|xxx	tGGAATGTAAA--GAAGT-ATGgag	mthl1	XP_001120757.4 probable G-protein coupled receptor Mth-like 1 [Apis mellifera]	-	-	-	-	GO:0016021//integral component of membrane	GO:0004930//G-protein coupled receptor activity	GO:0007186//G-protein coupled receptor signaling pathway
ame-miR-1-3p	XM_001120965.4	640	661	-12.89	gCCTTACAcaagaaactgtact	x|||||||xxxxxxxxxxxxxx	tGGAATGTaaagaagtatggag	CIDEA	XP_001120965.1 DNA fragmentation factor subunit alpha [Apis mellifera]	-	-	-	-	-	-	GO:0006915//apoptotic process
ame-miR-1-3p	XM_001121011.5	518	539	-17.13	tCCTTACATTGCATagcgatag	x|||||||||x|x|xxxxxxxx	tGGAATGTAAAGAAgtatggag	tal1	XP_001121011.2 uncharacterized protein LOC725127 isoform X2 [Apis mellifera]	-	-	-	-	-	GO:0046983//protein dimerization activity	-
ame-miR-1-3p	XM_001121323.5	786	807	-15.13	tCCTTACATAGTATTATAGCag	x||||||||xx:x|:|||x|xx	tGGAATGTAAAGAAGTATGGag	inx1	XP_001121323.1 innexin inx1 [Apis mellifera]	-	-	-	-	-	-	-
ame-miR-1-3p	XM_001121453.5	2455	2479	-14.14	tCCTTACACTACAGATTCAAGCTcc	x|||||||x|x|xxx||||x:|:xx	tGGAATGTAAAG---AAGTATGGag	--	XP_001121453.1 uncharacterized protein LOC725625 [Apis mellifera]	-	-	-	-	GO:0016021//integral component of membrane	-	-
ame-miR-1-3p	XM_001121463.5	1442	1466	-21.44	aCCTTACATCCGTGTATTATACCtt	x||||||||xxx|x:x|:|||||xx	tGGAATGTA---AAGAAGTATGGag	--	XP_006567531.1 uncharacterized protein LOC725634 isoform X1 [Apis mellifera]	-	-	-	-	-	GO:0005102//receptor binding	-
ame-miR-1-3p	XM_001121782.5	48	69	-14.65	aCCTTACAaagacagaagccaa	x|||||||xxxxxxxxxxxxxx	tGGAATGTaaagaagtatggag	--	XP_001121782.1 mantle protein-like [Apis mellifera]	-	-	-	-	-	-	-
ame-miR-1-3p	XM_001121941.4	1875	1896	-11.2	tCCTTACATagcaagttgaata	x||||||||xxxxxxxxxxxxx	tGGAATGTAaagaagtatggag	CREB3L4	XP_001121941.2 uncharacterized protein LOC726184 [Apis mellifera]	Human Diseases;Human Diseases;Environmental Information Processing;Organismal Systems;Human Diseases;Human Diseases;Organismal Systems;Organismal Systems;Environmental Information Processing;Environmental Information Processing;Organismal Systems;Organismal Systems;Human Diseases;Human Diseases;Organismal Systems;Organismal Systems;Human Diseases;Organismal Systems;Environmental Information Proce…	Neurodegenerative diseases;Infectious diseases;Signal transduction;Circulatory system;Infectious diseases;Endocrine and metabolic diseases;Nervous system;Environmental adaptation;Signal transduction;Signal transduction;Endocrine system;Endocrine system;Infectious diseases;Cancers;Nervous system;Endocrine system;Endocrine and metabolic diseases;Endocrine system;Signal transduction;Substance depend…	ko05016//Huntington disease;ko05165//Human papillomavirus infection;ko04024//cAMP signaling pathway;ko04261//Adrenergic signaling in cardiomyocytes;ko05166//HTLV-I infection;ko04934//Cushing syndrome;ko04728//Dopaminergic synapse;ko04714//Thermogenesis;ko04022//cGMP - PKG signaling pathway;ko04151//PI3K-Akt signaling pathway;ko04911//Insulin secretion;ko04922//Glucagon signaling pathway;ko05163//…	K09048;K09048;K09048;K09048;K09048;K09048;K09048;K09048;K09048;K09048;K09048;K09048;K09048;K09048;K09048;K09048;K09048;K09048;K09048;K09048;K09048;K09048;K09048;K09048;K09048;K09048;K09048;K09048;K09048;K09048;K09048;K09048;K09048	GO:0016021//integral component of membrane;GO:0031083//BLOC-1 complex	GO:0003677//DNA binding;GO:0003700//transcription factor activity, sequence-specific DNA binding	GO:0006355//regulation of transcription, DNA-templated;GO:0007030//Golgi organization
ame-miR-1-3p	XM_001122059.5	466	487	-15.54	aCCTTACAgaaatcgacaatct	x|||||||xxxxxxxxxxxxxx	tGGAATGTaaagaagtatggag	--	XP_001122059.2 receptor-binding cancer antigen expressed on SiSo cells [Apis mellifera]	-	-	-	-	GO:0016592//mediator complex	GO:0003712//transcription cofactor activity	GO:0006357//regulation of transcription from RNA polymerase II promoter
ame-miR-1-3p	XM_001122092.5	63	83	-14.55	tCCTTACATGTGAG-ATATCgt	x||||||||x|xxxx|||:|xx	tGGAATGTAAAGAAGTATGGag	ABLIM1	XP_001122092.2 actin-binding LIM protein 2 isoform X4 [Apis mellifera]	-	-	-	-	-	GO:0003779//actin binding	GO:0007010//cytoskeleton organization
ame-miR-1-3p	XM_001122256.5	1977	1998	-14.14	aCCTTACAaggcaagacgtcca	x|||||||xxxxxxxxxxxxxx	tGGAATGTaaagaagtatggag	--	XP_001122256.1 protein FAM136A [Apis mellifera]	-	-	-	-	GO:0000176//nuclear exosome (RNase complex);GO:0005576//extracellular region;GO:0005737//cytoplasm;GO:0005783//endoplasmic reticulum;GO:0005801//cis-Golgi network;GO:0016020//membrane;GO:0033179//proton-transporting V-type ATPase, V0 domain;GO:0042729//DASH complex;GO:0072686//mitotic spindle	GO:0003676//nucleic acid binding;GO:0004821//histidine-tRNA ligase activity;GO:0008289//lipid binding;GO:0008855//exodeoxyribonuclease VII activity;GO:0015078//hydrogen ion transmembrane transporter activity;GO:0016773//phosphotransferase activity, alcohol group as acceptor	GO:0000278//mitotic cell cycle;GO:0006396//RNA processing;GO:0006427//histidyl-tRNA aminoacylation;GO:0006869//lipid transport;GO:0006886//intracellular protein transport;GO:0016260//selenocysteine biosynthetic process;GO:0042157//lipoprotein metabolic process;GO:1902600//hydrogen ion transmembrane transport
ame-miR-1-3p	XM_001122688.5	2025	2052	-14.22	aCCTTACAAAATATATTATTTATGTCga	x|||||||xxx|xxx||x||:||::|xx	tGGAATGT---A---AAGAAGTATGGag	--	XP_001122688.2 uncharacterized protein LOC726972 [Apis mellifera]	-	-	-	-	-	-	-
ame-miR-1-3p	XM_001122705.5	110	131	-14.86	aCCTTACACGACAATATGCact	x|||||||xxx|xx:||:|xxx	tGGAATGTAAAGAAGTATGgag	Klc	XP_001122705.2 kinesin light chain isoform X7 [Apis mellifera]	Human Diseases;Human Diseases;Human Diseases	Neurodegenerative diseases;Neurodegenerative diseases;Infectious diseases	ko05010//Alzheimer disease;ko05016//Huntington disease;ko05132//Salmonella infection	K10407;K10407;K10407	GO:0005615//extracellular space	GO:0004356//glutamate-ammonia ligase activity;GO:0005515//protein binding;GO:0042802//identical protein binding	GO:0006542//glutamine biosynthetic process;GO:0006807//nitrogen compound metabolic process;GO:0006886//intracellular protein transport;GO:0010506//regulation of autophagy;GO:0016192//vesicle-mediated transport
ame-miR-1-3p	XM_003249309.4	8	30	-16.68	tCCTTACATACTTTTAATACTta	x||||||||xx|:||x||||:xx	tGGAATGTAA-AGAAGTATGGag	Nudt1	XP_003249357.1 7,8-dihydro-8-oxoguanine triphosphatase [Apis mellifera]	-	-	-	-	-	GO:0016787//hydrolase activity;GO:0016818//hydrolase activity, acting on acid anhydrides, in phosphorus-containing anhydrides;GO:0017111//nucleoside-triphosphatase activity	GO:0006139//nucleobase-containing compound metabolic process;GO:0006281//DNA repair
ame-miR-1-3p	XM_003249312.4	304	327	-11.7	tCCTTACATATGTATTTTTAattt	x||||||||x|x|x||:x||xxxx	tGGAATGTA-A-AGAAGTATggag	--	XP_003249360.1 uncharacterized protein LOC100577325 isoform X1 [Apis mellifera]	-	-	-	-	-	-	GO:0043386//mycotoxin biosynthetic process
ame-miR-1-3p	XM_003249313.4	304	327	-11.7	tCCTTACATATGTATTTTTAattt	x||||||||x|x|x||:x||xxxx	tGGAATGTA-A-AGAAGTATggag	--	XP_003249361.1 uncharacterized protein LOC100577325 isoform X2 [Apis mellifera]	-	-	-	-	-	-	GO:0043386//mycotoxin biosynthetic process
ame-miR-1-3p	XM_003249338.4	90	113	-11.16	aCCTTACAAATATAATAATAaatg	x|||||||xx|x|xx|x|||xxxx	tGGAATGTAAAGA--AGTATggag	MRPS33	XP_003249386.1 28S ribosomal protein S33, mitochondrial [Apis mellifera]	-	-	-	-	-	GO:0008817//cob(I)yrinic acid a,c-diamide adenosyltransferase activity	GO:0009236//cobalamin biosynthetic process
ame-miR-1-3p	XM_003249372.4	116	137	-13.98	aCCTTACAaaatggctagttcg	x|||||||xxxxxxxxxxxxxx	tGGAATGTaaagaagtatggag	--	XP_003249420.1 uncharacterized protein LOC100578246 isoform X1 [Apis mellifera]	-	-	-	-	GO:0005737//cytoplasm	GO:0005524//ATP binding;GO:0043565//sequence-specific DNA binding	GO:0006355//regulation of transcription, DNA-templated;GO:0007059//chromosome segregation;GO:0030261//chromosome condensation;GO:0043093//FtsZ-dependent cytokinesis;GO:0090529//cell septum assembly
ame-miR-1-3p	XM_003249510.4	359	380	-12.48	tCCTTACAaaccgaaagtacgc	x|||||||xxxxxxxxxxxxxx	tGGAATGTaaagaagtatggag	olf186-F	XP_003249558.1 calcium release-activated calcium channel protein 1 isoform X1 [Apis mellifera]	Environmental Information Processing;Environmental Information Processing;Human Diseases;Organismal Systems;Organismal Systems;Organismal Systems;Organismal Systems;Human Diseases	Signal transduction;Signal transduction;Endocrine and metabolic diseases;Endocrine system;Endocrine system;Immune system;Endocrine system;Immune diseases	ko04024//cAMP signaling pathway;ko04020//Calcium signaling pathway;ko04934//Cushing syndrome;ko04925//Aldosterone synthesis and secretion;ko04924//Renin secretion;ko04611//Platelet activation;ko04927//Cortisol synthesis and secretion;ko05340//Primary immunodeficiency	K16056;K16056;K16056;K16056;K16056;K16056;K16056;K16056	-	-	-
ame-miR-1-3p	XM_003249512.4	359	380	-12.48	tCCTTACAaaccgaaagtacgc	x|||||||xxxxxxxxxxxxxx	tGGAATGTaaagaagtatggag	olf186-F	XP_003249560.1 calcium release-activated calcium channel protein 1 isoform X2 [Apis mellifera]	Environmental Information Processing;Environmental Information Processing;Human Diseases;Organismal Systems;Organismal Systems;Organismal Systems;Organismal Systems;Human Diseases	Signal transduction;Signal transduction;Endocrine and metabolic diseases;Endocrine system;Endocrine system;Immune system;Endocrine system;Immune diseases	ko04024//cAMP signaling pathway;ko04020//Calcium signaling pathway;ko04934//Cushing syndrome;ko04925//Aldosterone synthesis and secretion;ko04924//Renin secretion;ko04611//Platelet activation;ko04927//Cortisol synthesis and secretion;ko05340//Primary immunodeficiency	K16056;K16056;K16056;K16056;K16056;K16056;K16056;K16056	-	GO:0004553//hydrolase activity, hydrolyzing O-glycosyl compounds;GO:0030246//carbohydrate binding	GO:0016052//carbohydrate catabolic process
ame-miR-1-3p	XM_003249528.4	19	39	-14.09	tCCTTACAACT-TACATGTTta	x|||||||xx|x|x|||:::xx	tGGAATGTAAAGAAGTATGGag	ZNRD1	XP_003249576.2 DNA-directed RNA polymerase I subunit RPA12 [Apis mellifera]	Genetic Information Processing	Transcription	ko03020//RNA polymerase	K03000	-	GO:0003676//nucleic acid binding;GO:0003700//transcription factor activity, sequence-specific DNA binding;GO:0008270//zinc ion binding	GO:0006351//transcription, DNA-templated;GO:0035556//intracellular signal transduction
ame-miR-1-3p	XM_003249629.4	511	530	-18.21	aCCTTACATGTCG--AAACCat	x||||||||x||xxx|x|||xx	tGGAATGTAAAGAAGTATGGag	GFI1B	XP_003249677.2 fez family zinc finger protein 1 [Apis mellifera]	-	-	-	-	-	GO:0003677//DNA binding;GO:0008270//zinc ion binding	-
ame-miR-1-3p	XM_003249827.4	683	705	-19.91	aCCTTACAATTTCATCATTTCat	x|||||||x||||x||||x:|xx	tGGAATGT-AAAGAAGTATGGag	--	XP_003249875.4 uncharacterized protein LOC100576471 [Apis mellifera]	-	-	-	-	-	-	-
ame-miR-1-3p	XM_003249946.4	848	869	-12.82	aCCTTACAacaagtgttacatt	x|||||||xxxxxxxxxxxxxx	tGGAATGTaaagaagtatggag	rad21	XP_003249994.1 double-strand-break repair protein rad21 homolog [Apis mellifera]	Cellular Processes	Cell growth and death	ko04110//Cell cycle	K06670	-	GO:0005515//protein binding	-
ame-miR-1-3p	XM_003250084.4	418	438	-17.53	tCCTTACATTTCCTTA-ACgtg	x|||||||||||x|:|x||xxx	tGGAATGTAAAGAAGTATGgag	CrebA	XP_003250132.2 cyclic AMP response element-binding protein A [Apis mellifera]	Human Diseases;Human Diseases;Environmental Information Processing;Organismal Systems;Human Diseases;Human Diseases;Organismal Systems;Organismal Systems;Environmental Information Processing;Environmental Information Processing;Organismal Systems;Organismal Systems;Human Diseases;Human Diseases;Organismal Systems;Organismal Systems;Human Diseases;Organismal Systems;Environmental Information Proce…	Neurodegenerative diseases;Infectious diseases;Signal transduction;Circulatory system;Infectious diseases;Endocrine and metabolic diseases;Nervous system;Environmental adaptation;Signal transduction;Signal transduction;Endocrine system;Endocrine system;Infectious diseases;Cancers;Nervous system;Endocrine system;Endocrine and metabolic diseases;Endocrine system;Signal transduction;Substance depend…	ko05016//Huntington disease;ko05165//Human papillomavirus infection;ko04024//cAMP signaling pathway;ko04261//Adrenergic signaling in cardiomyocytes;ko05166//HTLV-I infection;ko04934//Cushing syndrome;ko04728//Dopaminergic synapse;ko04714//Thermogenesis;ko04022//cGMP - PKG signaling pathway;ko04151//PI3K-Akt signaling pathway;ko04911//Insulin secretion;ko04922//Glucagon signaling pathway;ko05163//…	K09048;K09048;K09048;K09048;K09048;K09048;K09048;K09048;K09048;K09048;K09048;K09048;K09048;K09048;K09048;K09048;K09048;K09048;K09048;K09048;K09048;K09048;K09048;K09048;K09048;K09048;K09048;K09048;K09048;K09048;K09048;K09048;K09048	-	GO:0003677//DNA binding;GO:0003700//transcription factor activity, sequence-specific DNA binding	GO:0006355//regulation of transcription, DNA-templated
ame-miR-1-3p	XM_003250212.4	1013	1032	-17.62	aCCTTACATTT--TCAAAGCtt	x||||||||||xx|||x|x|xx	tGGAATGTAAAGAAGTATGGag	KCNIP4	XP_003250260.1 Kv channel-interacting protein 2 isoform X3 [Apis mellifera]	-	-	-	-	-	GO:0005509//calcium ion binding;GO:0005515//protein binding	-
ame-miR-1-3p	XM_003250298.4	1359	1381	-13.35	cCCTTACATATAGTTTCTATTag	x||||||||x|xx||:x||::xx	tGGAATGTAAAG-AAGTATGGag	Cdlc2	XP_029160356.1 dynein light chain 2, cytoplasmic isoform X1 [Nylanderia fulva]	Human Diseases;Organismal Systems	Infectious diseases;Excretory system	ko05132//Salmonella infection;ko04962//Vasopressin-regulated water reabsorption	K10418;K10418	GO:0030286//dynein complex	-	GO:0007017//microtubule-based process
ame-miR-1-3p	XM_003250483.4	3440	3461	-11.36	tCCTTACAcaaatgactctttt	x|||||||xxxxxxxxxxxxxx	tGGAATGTaaagaagtatggag	NOVA1	XP_003250531.1 RNA-binding protein Nova-1 isoform X1 [Apis mellifera]	-	-	-	-	-	GO:0003723//RNA binding;GO:0004654//polyribonucleotide nucleotidyltransferase activity	GO:0006402//mRNA catabolic process
ame-miR-1-3p	XM_003250636.3	1265	1286	-13.99	aCCTTACAggaccagcacgaat	x|||||||xxxxxxxxxxxxxx	tGGAATGTaaagaagtatggag	slc30a7-a	XP_003250684.1 zinc transporter 7 [Apis mellifera]	-	-	-	-	GO:0016020//membrane;GO:0016021//integral component of membrane	GO:0008324//cation transmembrane transporter activity;GO:0015562//efflux transmembrane transporter activity	GO:0006812//cation transport;GO:0055085//transmembrane transport
ame-miR-1-3p	XM_003250637.4	985	1006	-19.9	aCCTTACACGCTATCGTGCacc	x|||||||xxx:x||:|:|xxx	tGGAATGTAAAGAAGTATGgag	--	XP_003250685.2 uncharacterized protein LOC100576129 isoform X2 [Apis mellifera]	-	-	-	-	-	-	-
ame-miR-1-3p	XM_003251024.4	432	453	-11.81	tCCTTACAGAAGTTCGCAagat	x|||||||xxxx|||:x|xxxx	tGGAATGTAAAGAAGTATggag	Atf3	XP_003251072.1 activating transcription factor 3 isoform X2 [Apis mellifera]	-	-	-	-	GO:0016021//integral component of membrane	GO:0003677//DNA binding;GO:0003700//transcription factor activity, sequence-specific DNA binding;GO:0005219//ryanodine-sensitive calcium-release channel activity;GO:0043565//sequence-specific DNA binding	GO:0006355//regulation of transcription, DNA-templated;GO:0006874//cellular calcium ion homeostasis
ame-miR-1-3p	XM_003251240.4	778	800	-18.45	tCCTTACATGTGTCGCGTATact	x||||||||x|x|xx|:||:xxx	tGGAATGTAAAGAA-GTATGgag	--	XP_003251288.1 uncharacterized protein LOC100578484 [Apis mellifera]	-	-	-	-	GO:0005634//nucleus	GO:0004861//cyclin-dependent protein serine/threonine kinase inhibitor activity;GO:0016491//oxidoreductase activity	GO:0007050//cell cycle arrest;GO:0055114//oxidation-reduction process
ame-miR-1-3p	XM_003251455.4	899	919	-13.52	gCCTTACAACTGTT-ATAagat	x|||||||xx|x||x|||xxxx	tGGAATGTAAAGAAGTATggag	Arf79F	TGZ54254.1 ADP-ribosylation factor 1 [Temnothorax longispinosus]	Cellular Processes;Human Diseases;Human Diseases;Environmental Information Processing;Human Diseases;Human Diseases;Human Diseases	Transport and catabolism;Infectious diseases;Infectious diseases;Signal transduction;Infectious diseases;Infectious diseases;Infectious diseases	ko04144//Endocytosis;ko05131//Shigellosis;ko05132//Salmonella infection;ko04072//Phospholipase D signaling pathway;ko05130//Pathogenic Escherichia coli infection;ko05110//Vibrio cholerae infection;ko05134//Legionellosis	K07937;K07937;K07937;K07937;K07937;K07937;K07937	GO:0048501//signal recognition particle, plasma membrane targeting	GO:0003873//6-phosphofructo-2-kinase activity;GO:0003924//GTPase activity;GO:0005048//signal sequence binding;GO:0005524//ATP binding;GO:0005525//GTP binding;GO:0019001//guanyl nucleotide binding;GO:0031683//G-protein beta/gamma-subunit complex binding	GO:0006000//fructose metabolic process;GO:0007186//G-protein coupled receptor signaling pathway;GO:0009306//protein secretion
ame-miR-1-3p	XM_003251509.4	232	254	-17.29	aCCTTACATAATTTTCTTATTgc	x||||||||xx|:|||x||::xx	tGGAATGTAA-AGAAGTATGGag	--	XP_003251557.1 uncharacterized protein LOC100578413 [Apis mellifera]	-	-	-	-	-	-	-
ame-miR-1-3p	XM_003251544.4	203	224	-11.4	tCCTTACAAGTTTTacgaggaa	x|||||||xx|:||xxxxxxxx	tGGAATGTAAAGAAgtatggag	TBC1D20	XP_012348235.1 TBC1 domain family member 20 isoform X2 [Apis florea]	-	-	-	-	-	-	-
ame-miR-1-3p	XM_006557267.3	262	284	-12.26	tCCTTACAAAAAATACATATgtg	x|||||||xxxxx|x||||:xxx	tGGAATGTAAAGAA-GTATGgag	PI4KA	XP_006557330.1 phosphatidylinositol 4-kinase alpha [Apis mellifera]	Metabolism;Environmental Information Processing;Metabolism	Global and overview maps;Signal transduction;Carbohydrate metabolism	ko01100//Metabolic pathways;ko04070//Phosphatidylinositol signaling system;ko00562//Inositol phosphate metabolism	K00888;K00888;K00888	-	GO:0016709//oxidoreductase activity, acting on paired donors, with incorporation or reduction of molecular oxygen, NAD(P)H as one donor, and incorporation of one atom of oxygen	GO:0006352//DNA-templated transcription, initiation;GO:0006744//ubiquinone biosynthetic process
ame-miR-1-3p	XM_006557392.2	743	766	-14.62	aCCTTACACAATTGATCATAaatg	x|||||||xxx||xx|||||xxxx	tGGAATGTA--AAGAAGTATggag	FTZ-F1	XP_006557455.1 nuclear hormone receptor FTZ-F1 [Apis mellifera]	-	-	-	-	-	GO:0003700//transcription factor activity, sequence-specific DNA binding;GO:0008270//zinc ion binding;GO:0043565//sequence-specific DNA binding	GO:0006355//regulation of transcription, DNA-templated
ame-miR-1-3p	XM_006557441.3	1360	1381	-11.6	tCCTTACATgaacacagtcaag	x||||||||xxxxxxxxxxxxx	tGGAATGTAaagaagtatggag	Arhgap1	XP_006557504.1 rho GTPase-activating protein 1 isoform X2 [Apis mellifera]	-	-	-	-	-	-	GO:0007165//signal transduction
ame-miR-1-3p	XM_006557498.3	3555	3574	-15.63	gCCTTACATGTC--CATGACat	x||||||||x||xx|||:x|xx	tGGAATGTAAAGAAGTATGGag	chinmo	XP_006557561.1 zinc finger protein chinmo isoform X1 [Apis mellifera]	-	-	-	-	-	GO:0003677//DNA binding;GO:0005515//protein binding;GO:0008270//zinc ion binding	-
ame-miR-1-3p	XM_006557500.3	3555	3574	-15.63	gCCTTACATGTC--CATGACat	x||||||||x||xx|||:x|xx	tGGAATGTAAAGAAGTATGGag	chinmo	XP_006557563.1 zinc finger protein chinmo isoform X2 [Apis mellifera]	-	-	-	-	-	GO:0003677//DNA binding;GO:0005515//protein binding;GO:0008270//zinc ion binding	-
ame-miR-1-3p	XM_006557502.3	3555	3574	-15.63	gCCTTACATGTC--CATGACat	x||||||||x||xx|||:x|xx	tGGAATGTAAAGAAGTATGGag	chinmo	XP_006557565.1 zinc finger protein chinmo isoform X3 [Apis mellifera]	-	-	-	-	-	GO:0003677//DNA binding;GO:0005515//protein binding;GO:0008270//zinc ion binding	-
ame-miR-1-3p	XM_006557674.3	306	327	-18.42	tCCTTACATTGCTACTTctatg	x|||||||||x||x|x|xxxxx	tGGAATGTAAAGAAGTAtggag	--	XP_006557737.1 uncharacterized protein LOC552005 [Apis mellifera]	-	-	-	-	-	-	-
ame-miR-1-3p	XM_006557675.3	306	327	-18.42	tCCTTACATTGCTACTTctatg	x|||||||||x||x|x|xxxxx	tGGAATGTAAAGAAGTAtggag	--	XP_006557737.1 uncharacterized protein LOC552005 [Apis mellifera]	-	-	-	-	-	-	-
ame-miR-1-3p	XM_006557766.3	124	146	-19.16	aCCTTACATTTAAAACATATaga	x||||||||||xxxx||||:xxx	tGGAATGTAAAGAA-GTATGgag	CG17119	XP_006557829.1 cystinosin homolog isoform X1 [Apis mellifera]	-	-	-	-	-	-	-
ame-miR-1-3p	XM_006557768.3	124	146	-19.16	aCCTTACATTTAAAACATATaga	x||||||||||xxxx||||:xxx	tGGAATGTAAAGAA-GTATGgag	CG17119	XP_006557831.1 cystinosin homolog isoform X3 [Apis mellifera]	-	-	-	-	-	-	-
ame-miR-1-3p	XM_006557769.3	124	146	-19.16	aCCTTACATTTAAAACATATaga	x||||||||||xxxx||||:xxx	tGGAATGTAAAGAA-GTATGgag	CG17119	XP_006557831.1 cystinosin homolog isoform X3 [Apis mellifera]	-	-	-	-	-	-	-
ame-miR-1-3p	XM_006558108.3	1055	1082	-16.26	tCCTTACACCAGCGTTTCTTATTGCTgt	x|||||||xxxxxx||||||xx|:|:xx	tGGAATGT------AAAGAAGTATGGag	Dscam2	XP_006558171.1 dscam family member AbsCAM isoform X1 [Apis mellifera]	-	-	-	-	-	GO:0003993//acid phosphatase activity;GO:0005515//protein binding;GO:0046872//metal ion binding	-
ame-miR-1-3p	XM_006558109.3	1055	1082	-16.26	tCCTTACACCAGCGTTTCTTATTGCTgt	x|||||||xxxxxx||||||xx|:|:xx	tGGAATGT------AAAGAAGTATGGag	Dscam2	XP_006558172.1 dscam family member AbsCAM isoform X2 [Apis mellifera]	-	-	-	-	-	GO:0003993//acid phosphatase activity;GO:0005515//protein binding;GO:0046872//metal ion binding	-
ame-miR-1-3p	XM_006558110.3	1055	1082	-16.26	tCCTTACACCAGCGTTTCTTATTGCTgt	x|||||||xxxxxx||||||xx|:|:xx	tGGAATGT------AAAGAAGTATGGag	Dscam2	XP_006558173.1 dscam family member AbsCAM isoform X3 [Apis mellifera]	-	-	-	-	-	GO:0003993//acid phosphatase activity;GO:0005515//protein binding;GO:0046872//metal ion binding	-
ame-miR-1-3p	XM_006558111.3	1055	1082	-16.26	tCCTTACACCAGCGTTTCTTATTGCTgt	x|||||||xxxxxx||||||xx|:|:xx	tGGAATGT------AAAGAAGTATGGag	Dscam2	XP_006558174.1 dscam family member AbsCAM isoform X4 [Apis mellifera]	-	-	-	-	-	GO:0003993//acid phosphatase activity;GO:0005515//protein binding;GO:0046872//metal ion binding	-
ame-miR-1-3p	XM_006558113.3	1055	1082	-16.26	tCCTTACACCAGCGTTTCTTATTGCTgt	x|||||||xxxxxx||||||xx|:|:xx	tGGAATGT------AAAGAAGTATGGag	Dscam2	XP_006558176.1 dscam family member AbsCAM isoform X5 [Apis mellifera]	-	-	-	-	-	GO:0003993//acid phosphatase activity;GO:0005515//protein binding;GO:0046872//metal ion binding	-
ame-miR-1-3p	XM_006558114.3	1055	1082	-16.26	tCCTTACACCAGCGTTTCTTATTGCTgt	x|||||||xxxxxx||||||xx|:|:xx	tGGAATGT------AAAGAAGTATGGag	Dscam2	XP_006558177.1 dscam family member AbsCAM isoform X6 [Apis mellifera]	-	-	-	-	-	GO:0003993//acid phosphatase activity;GO:0005515//protein binding;GO:0046872//metal ion binding	-
ame-miR-1-3p	XM_006558115.3	1055	1082	-16.26	tCCTTACACCAGCGTTTCTTATTGCTgt	x|||||||xxxxxx||||||xx|:|:xx	tGGAATGT------AAAGAAGTATGGag	Dscam2	XP_006558178.1 dscam family member AbsCAM isoform X7 [Apis mellifera]	-	-	-	-	-	GO:0003993//acid phosphatase activity;GO:0005515//protein binding;GO:0046872//metal ion binding	-
ame-miR-1-3p	XM_006558116.3	1055	1082	-16.26	tCCTTACACCAGCGTTTCTTATTGCTgt	x|||||||xxxxxx||||||xx|:|:xx	tGGAATGT------AAAGAAGTATGGag	Dscam2	XP_006558179.1 dscam family member AbsCAM isoform X11 [Apis mellifera]	-	-	-	-	-	GO:0003993//acid phosphatase activity;GO:0005515//protein binding;GO:0046872//metal ion binding	-
ame-miR-1-3p	XM_006558445.3	796	818	-17.69	gCCTTACAGTCTCTACATTTCac	x|||||||x|x|||x|||x:|xx	tGGAATGTAA-AGAAGTATGGag	--	XP_006558509.1 uncharacterized protein LOC410975 isoform X4 [Apis mellifera]	-	-	-	-	-	-	-
ame-miR-1-3p	XM_006558446.3	796	818	-17.69	gCCTTACAGTCTCTACATTTCac	x|||||||x|x|||x|||x:|xx	tGGAATGTAA-AGAAGTATGGag	--	XP_006558509.1 uncharacterized protein LOC410975 isoform X4 [Apis mellifera]	-	-	-	-	-	-	-
ame-miR-1-3p	XM_006558495.3	236	257	-14.35	tCCTTACAAGTATTTTTGCTta	x|||||||xx|x||:x|:|:xx	tGGAATGTAAAGAAGTATGGag	tun	XP_006558558.3 protein N-terminal glutamine amidohydrolase isoform X1 [Apis mellifera]	-	-	-	-	-	GO:0004170//dUTP diphosphatase activity;GO:0008829//dCTP deaminase activity	GO:0009394//2'-deoxyribonucleotide metabolic process
ame-miR-1-3p	XM_006558575.3	3052	3074	-13.71	aCCTTACAAACCAACATTACgtt	x|||||||xxx|xx|||x||xxx	tGGAATGTAAAGAAGTA-TGgag	--	XP_006558638.1 uncharacterized protein LOC113218523 [Apis mellifera]	-	-	-	-	GO:0016020//membrane	GO:0019784//NEDD8-specific protease activity	GO:0039693//viral DNA genome replication;GO:0055085//transmembrane transport
ame-miR-1-3p	XM_006558700.3	124	144	-15.21	tCCTTACATAA-TACAAGCCgc	x||||||||xxx|x||x:||xx	tGGAATGTAAAGAAGTATGGag	--	XP_006558763.1 angiotensin-converting enzyme [Apis mellifera]	Human Diseases;Organismal Systems;Human Diseases;Organismal Systems	Cardiovascular diseases;Endocrine system;Infectious diseases;Endocrine system	ko05410//Hypertrophic cardiomyopathy (HCM);ko04924//Renin secretion;ko05142//Chagas disease (American trypanosomiasis);ko04614//Renin-angiotensin system	K01283;K01283;K01283;K01283	GO:0016020//membrane	GO:0008237//metallopeptidase activity;GO:0008241//peptidyl-dipeptidase activity	GO:0006508//proteolysis
ame-miR-1-3p	XM_006558762.3	322	344	-14.04	aCCTTACATGGTTACAATAgtag	x||||||||xx:|x||x||xxxx	tGGAATGTAAAGAAGT-ATggag	--	XP_006558825.2 uncharacterized protein LOC102655706 [Apis mellifera]	-	-	-	-	-	GO:0005515//protein binding	GO:0000917//barrier septum assembly
ame-miR-1-3p	XM_006558859.3	47	69	-15.4	aCCTTACATTCACAATGTATTta	x|||||||||xx|xx::||::xx	tGGAATGTAAA-GAAGTATGGag	CLGN	XP_006558922.1 calnexin isoform X1 [Apis mellifera]	Human Diseases;Genetic Information Processing;Cellular Processes;Organismal Systems;Organismal Systems	Infectious diseases;Folding, sorting and degradation;Transport and catabolism;Endocrine system;Immune system	ko05166//HTLV-I infection;ko04141//Protein processing in endoplasmic reticulum;ko04145//Phagosome;ko04918//Thyroid hormone synthesis;ko04612//Antigen processing and presentation	K08054;K08054;K08054;K08054;K08054	GO:0005783//endoplasmic reticulum	GO:0005509//calcium ion binding;GO:0051082//unfolded protein binding	GO:0006457//protein folding
ame-miR-1-3p	XM_006558861.3	47	69	-15.4	aCCTTACATTCACAATGTATTta	x|||||||||xx|xx::||::xx	tGGAATGTAAA-GAAGTATGGag	CANX	XP_006558924.1 calnexin isoform X2 [Apis mellifera]	Human Diseases;Genetic Information Processing;Cellular Processes;Organismal Systems;Organismal Systems	Infectious diseases;Folding, sorting and degradation;Transport and catabolism;Endocrine system;Immune system	ko05166//HTLV-I infection;ko04141//Protein processing in endoplasmic reticulum;ko04145//Phagosome;ko04918//Thyroid hormone synthesis;ko04612//Antigen processing and presentation	K08054;K08054;K08054;K08054;K08054	GO:0005783//endoplasmic reticulum	GO:0005509//calcium ion binding;GO:0051082//unfolded protein binding	GO:0006457//protein folding
ame-miR-1-3p	XM_006559010.3	116	137	-13.98	aCCTTACAaaatggctagttcg	x|||||||xxxxxxxxxxxxxx	tGGAATGTaaagaagtatggag	--	XP_006559073.1 myosin-7B isoform X2 [Apis mellifera]	-	-	-	-	GO:0005737//cytoplasm	GO:0005524//ATP binding;GO:0043565//sequence-specific DNA binding	GO:0006355//regulation of transcription, DNA-templated;GO:0007059//chromosome segregation;GO:0030261//chromosome condensation;GO:0043093//FtsZ-dependent cytokinesis;GO:0090529//cell septum assembly
ame-miR-1-3p	XM_006559053.3	24	45	-13.08	aCCTTACAATTaaaatgtattg	x|||||||x||xxxxxxxxxxx	tGGAATGTAAAgaagtatggag	eas	XP_006559116.2 ethanolamine kinase 1 [Apis mellifera]	Metabolism;Metabolism	Global and overview maps;Lipid metabolism	ko01100//Metabolic pathways;ko00564//Glycerophospholipid metabolism	K00894;K00894	-	GO:0019165//thiamine kinase activity	GO:0009228//thiamine biosynthetic process
ame-miR-1-3p	XM_006559054.3	24	45	-13.08	aCCTTACAATTaaaatgtattg	x|||||||x||xxxxxxxxxxx	tGGAATGTAAAgaagtatggag	eas	XP_006559116.2 ethanolamine kinase 1 [Apis mellifera]	Metabolism;Metabolism	Global and overview maps;Lipid metabolism	ko01100//Metabolic pathways;ko00564//Glycerophospholipid metabolism	K00894;K00894	-	GO:0019165//thiamine kinase activity	GO:0009228//thiamine biosynthetic process
ame-miR-1-3p	XM_006559061.3	157	178	-12	cCCTTACATTAACTAATAgtgc	x|||||||||xxx|x|||xxxx	tGGAATGTAAAGAAGTATggag	knrl	XP_006559124.1 knirps-related protein [Apis mellifera]	-	-	-	-	GO:0005634//nucleus	GO:0003677//DNA binding;GO:0003700//transcription factor activity, sequence-specific DNA binding;GO:0004879//RNA polymerase II transcription factor activity, ligand-activated sequence-specific DNA binding;GO:0005496//steroid binding;GO:0008270//zinc ion binding;GO:0043565//sequence-specific DNA binding	GO:0006355//regulation of transcription, DNA-templated;GO:0030521//androgen receptor signaling pathway
ame-miR-1-3p	XM_006559062.3	157	178	-12	cCCTTACATTAACTAATAgtgc	x|||||||||xxx|x|||xxxx	tGGAATGTAAAGAAGTATggag	knrl	XP_006559124.1 knirps-related protein [Apis mellifera]	-	-	-	-	GO:0005634//nucleus	GO:0003677//DNA binding;GO:0003700//transcription factor activity, sequence-specific DNA binding;GO:0004879//RNA polymerase II transcription factor activity, ligand-activated sequence-specific DNA binding;GO:0005496//steroid binding;GO:0008270//zinc ion binding;GO:0043565//sequence-specific DNA binding	GO:0006355//regulation of transcription, DNA-templated;GO:0030521//androgen receptor signaling pathway
ame-miR-1-3p	XM_006559258.3	494	520	-19.24	tCCTTACATAAGAATTTTTAATACCtt	x||||||||xxxxx||:||x|||||xx	tGGAATGTA-----AAGAAGTATGGag	ME1	XP_006559321.1 NADP-dependent malic enzyme isoform X2 [Apis mellifera]	Metabolism;Metabolism;Organismal Systems;Metabolism	Global and overview maps;Global and overview maps;Endocrine system;Carbohydrate metabolism	ko01100//Metabolic pathways;ko01200//Carbon metabolism;ko03320//PPAR signaling pathway;ko00620//Pyruvate metabolism	K00029;K00029;K00029;K00029	-	GO:0004471//malate dehydrogenase (decarboxylating) (NAD+) activity;GO:0051287//NAD binding	GO:0055114//oxidation-reduction process
ame-miR-1-3p	XM_006559381.3	403	425	-12.88	aCCTTACATATGTAACGTGTTat	x||||||||x|x|xx|:|:::xx	tGGAATGTAAAGAA-GTATGGag	stan	XP_006559444.2 protocadherin-like wing polarity protein stan isoform X1 [Apis mellifera]	-	-	-	-	GO:0016020//membrane;GO:0016021//integral component of membrane	GO:0004930//G-protein coupled receptor activity;GO:0005509//calcium ion binding	GO:0007156//homophilic cell adhesion via plasma membrane adhesion molecules;GO:0007186//G-protein coupled receptor signaling pathway
ame-miR-1-3p	XM_006559382.3	422	444	-12.88	aCCTTACATATGTAACGTGTTat	x||||||||x|x|xx|:|:::xx	tGGAATGTAAAGAA-GTATGGag	stan	XP_006559445.2 protocadherin-like wing polarity protein stan isoform X3 [Apis mellifera]	-	-	-	-	GO:0016020//membrane;GO:0016021//integral component of membrane	GO:0004930//G-protein coupled receptor activity;GO:0005509//calcium ion binding	GO:0007156//homophilic cell adhesion via plasma membrane adhesion molecules;GO:0007186//G-protein coupled receptor signaling pathway
ame-miR-1-3p	XM_006559383.2	713	734	-12.35	tCCTTACACGTGCACATttgcg	x|||||||xx|xxx|||xxxxx	tGGAATGTAAAGAAGTAtggag	Inx3	XP_006559446.1 innexin inx3 [Apis mellifera]	-	-	-	-	-	-	-
ame-miR-1-3p	XM_006559643.3	38	59	-13.99	aCCTTACAggaccagcaacaat	x|||||||xxxxxxxxxxxxxx	tGGAATGTaaagaagtatggag	v1g180167	XP_006559706.2 coiled-coil domain-containing protein 22 homolog isoform X2 [Apis mellifera]	-	-	-	-	GO:0016020//membrane	GO:0005524//ATP binding	GO:0007059//chromosome segregation;GO:0007165//signal transduction;GO:0030261//chromosome condensation
ame-miR-1-3p	XM_006559821.3	1739	1760	-11.16	aCCTTACAaagggcaaataaag	x|||||||xxxxxxxxxxxxxx	tGGAATGTaaagaagtatggag	14-3-3epsilon	XP_006559884.1 14-3-3 protein epsilon [Apis mellifera]	Environmental Information Processing;Environmental Information Processing;Cellular Processes;Human Diseases;Organismal Systems;Cellular Processes;Environmental Information Processing;Human Diseases;Organismal Systems	Signal transduction;Signal transduction;Cell growth and death;Cancers;Nervous system;Cell growth and death;Signal transduction;Infectious diseases;Immune system	ko04151//PI3K-Akt signaling pathway;ko04390//Hippo signaling pathway;ko04110//Cell cycle;ko05203//Viral carcinogenesis;ko04722//Neurotrophin signaling pathway;ko04114//Oocyte meiosis;ko04391//Hippo signaling pathway -fly;ko05160//Hepatitis C;ko04621//NOD-like receptor signaling pathway	K06630;K06630;K06630;K06630;K06630;K06630;K06630;K06630;K06630	-	GO:0003674//molecular_function	GO:0030436//asexual sporulation
ame-miR-1-3p	XM_006559825.3	39	59	-15.92	aCCTTACACTCCGTCC-ACCgc	x|||||||x|x|x||xx|||xx	tGGAATGTAAAGAAGTATGGag	Dpp4	XP_006559888.1 venom dipeptidyl peptidase 4-like isoform X1 [Apis mellifera]	Organismal Systems	Digestive system	ko04974//Protein digestion and absorption	K01278	-	GO:0008236//serine-type peptidase activity;GO:0030246//carbohydrate binding	GO:0006508//proteolysis
ame-miR-1-3p	XM_006559826.3	39	59	-15.92	aCCTTACACTCCGTCC-ACCgc	x|||||||x|x|x||xx|||xx	tGGAATGTAAAGAAGTATGGag	Dpp4	XP_006559889.1 venom dipeptidyl peptidase 4-like isoform X2 [Apis mellifera]	Organismal Systems	Digestive system	ko04974//Protein digestion and absorption	K01278	-	GO:0008236//serine-type peptidase activity;GO:0030246//carbohydrate binding	GO:0006508//proteolysis
ame-miR-1-3p	XM_006559827.3	39	59	-15.92	aCCTTACACTCCGTCC-ACCgc	x|||||||x|x|x||xx|||xx	tGGAATGTAAAGAAGTATGGag	Dpp4	XP_006559890.1 venom dipeptidyl peptidase 4-like isoform X3 [Apis mellifera]	Organismal Systems	Digestive system	ko04974//Protein digestion and absorption	K01278	-	GO:0008236//serine-type peptidase activity;GO:0030246//carbohydrate binding	GO:0006508//proteolysis
ame-miR-1-3p	XM_006559828.3	39	59	-15.92	aCCTTACACTCCGTCC-ACCgc	x|||||||x|x|x||xx|||xx	tGGAATGTAAAGAAGTATGGag	Dpp4	XP_006559890.1 venom dipeptidyl peptidase 4-like isoform X3 [Apis mellifera]	Organismal Systems	Digestive system	ko04974//Protein digestion and absorption	K01278	-	GO:0008236//serine-type peptidase activity;GO:0030246//carbohydrate binding	GO:0006508//proteolysis
ame-miR-1-3p	XM_006559829.3	39	59	-15.92	aCCTTACACTCCGTCC-ACCgc	x|||||||x|x|x||xx|||xx	tGGAATGTAAAGAAGTATGGag	Dpp4	XP_006559890.1 venom dipeptidyl peptidase 4-like isoform X3 [Apis mellifera]	Organismal Systems	Digestive system	ko04974//Protein digestion and absorption	K01278	-	GO:0008236//serine-type peptidase activity;GO:0030246//carbohydrate binding	GO:0006508//proteolysis
ame-miR-1-3p	XM_006559902.3	1654	1675	-12.38	tCCTTACAATTATTGCGATCta	x|||||||x||x||xxx|:|xx	tGGAATGTAAAGAAGTATGGag	NTM	XP_006559965.2 neurotrimin isoform X2 [Apis mellifera]	-	-	-	-	-	GO:0000978//RNA polymerase II core promoter proximal region sequence-specific DNA binding	GO:0006357//regulation of transcription from RNA polymerase II promoter
ame-miR-1-3p	XM_006559907.3	1654	1675	-12.38	tCCTTACAATTATTGCGATCta	x|||||||x||x||xxx|:|xx	tGGAATGTAAAGAAGTATGGag	NTM	XP_006559970.2 neurotrimin isoform X6 [Apis mellifera]	-	-	-	-	-	GO:0000978//RNA polymerase II core promoter proximal region sequence-specific DNA binding	GO:0006357//regulation of transcription from RNA polymerase II promoter
ame-miR-1-3p	XM_006559910.3	1654	1675	-12.38	tCCTTACAATTATTGCGATCta	x|||||||x||x||xxx|:|xx	tGGAATGTAAAGAAGTATGGag	NTM	XP_026298859.1 neurotrimin isoform X1 [Apis mellifera]	-	-	-	-	-	GO:0000978//RNA polymerase II core promoter proximal region sequence-specific DNA binding	GO:0006357//regulation of transcription from RNA polymerase II promoter
ame-miR-1-3p	XM_006560015.3	2040	2063	-15.07	tCCTTACAAGTGGCAGCCTACaaa	x|||||||xx|xx|xx|x|||xxx	tGGAATGTAAA--GAAGTATGgag	pros	XP_006560078.2 homeobox protein prospero isoform X1 [Apis mellifera]	Environmental Information Processing	Signal transduction	ko04013//MAPK signaling pathway - fly	K20211	-	GO:0003677//DNA binding	-
ame-miR-1-3p	XM_006560121.3	554	575	-12.2	gCCTTACAACACGTGGTcagat	x|||||||xxx|x|x:|xxxxx	tGGAATGTAAAGAAGTAtggag	Fas2	XP_006560184.1 fasciclin-2 isoform X7 [Apis mellifera]	Environmental Information Processing;Human Diseases	Signaling molecules and interaction;Neurodegenerative diseases	ko04514//Cell adhesion molecules (CAMs);ko05020//Prion diseases	K06491;K06491	-	GO:0003993//acid phosphatase activity;GO:0005515//protein binding;GO:0046872//metal ion binding	-
ame-miR-1-3p	XM_006560168.3	2976	2997	-23.22	gCCTTACATTTCTTTccagatt	x|||||||||||||:xxxxxxx	tGGAATGTAAAGAAGtatggag	GluClalpha	XP_006560231.1 glutamate-gated chloride channel isoform X1 [Apis mellifera]	-	-	-	-	GO:0016021//integral component of membrane	GO:0005230//extracellular ligand-gated ion channel activity	GO:0006811//ion transport
ame-miR-1-3p	XM_006560169.3	2976	2997	-23.22	gCCTTACATTTCTTTccagatt	x|||||||||||||:xxxxxxx	tGGAATGTAAAGAAGtatggag	GluClalpha	XP_006560232.1 glutamate-gated chloride channel isoform X2 [Apis mellifera]	-	-	-	-	GO:0016021//integral component of membrane	GO:0005230//extracellular ligand-gated ion channel activity	GO:0006811//ion transport
ame-miR-1-3p	XM_006560170.3	2976	2997	-23.22	gCCTTACATTTCTTTccagatt	x|||||||||||||:xxxxxxx	tGGAATGTAAAGAAGtatggag	GluClalpha	XP_006560233.1 glutamate-gated chloride channel isoform X3 [Apis mellifera]	-	-	-	-	GO:0016021//integral component of membrane	GO:0005230//extracellular ligand-gated ion channel activity	GO:0006811//ion transport
ame-miR-1-3p	XM_006560173.3	2976	2997	-23.22	gCCTTACATTTCTTTccagatt	x|||||||||||||:xxxxxxx	tGGAATGTAAAGAAGtatggag	GluClalpha	XP_006560233.1 glutamate-gated chloride channel isoform X3 [Apis mellifera]	-	-	-	-	GO:0016021//integral component of membrane	GO:0005230//extracellular ligand-gated ion channel activity	GO:0006811//ion transport
ame-miR-1-3p	XM_006560302.3	2457	2481	-16.63	aCCTTACAACCTATTTTTATATata	x|||||||xxx|x|:||:|||:xxx	tGGAATGT---AAAGAAGTATGgag	Dll	XP_006560365.1 distal-less isoform X4 [Apis mellifera]	-	-	-	-	-	GO:0003677//DNA binding	GO:0006355//regulation of transcription, DNA-templated
ame-miR-1-3p	XM_006560304.3	2457	2481	-16.63	aCCTTACAACCTATTTTTATATata	x|||||||xxx|x|:||:|||:xxx	tGGAATGT---AAAGAAGTATGgag	Dll	XP_006560367.1 distal-less isoform X5 [Apis mellifera]	-	-	-	-	-	GO:0003677//DNA binding	GO:0006355//regulation of transcription, DNA-templated
ame-miR-1-3p	XM_006560722.3	5545	5566	-11.57	tCCTTACATAATATTGCGCgga	x||||||||xx:x|::x:|xxx	tGGAATGTAAAGAAGTATGgag	Hmcn1	XP_006560785.2 lachesin isoform X1 [Apis mellifera]	-	-	-	-	-	-	-
ame-miR-1-3p	XM_006560723.3	5545	5566	-11.57	tCCTTACATAATATTGCGCgga	x||||||||xx:x|::x:|xxx	tGGAATGTAAAGAAGTATGgag	Ncam2	XP_006560786.2 lachesin isoform X3 [Apis mellifera]	-	-	-	-	-	-	-
ame-miR-1-3p	XM_006560928.3	40	61	-10.77	aCCTTACAcaagacaagaaagc	x|||||||xxxxxxxxxxxxxx	tGGAATGTaaagaagtatggag	--	XP_006560991.1 neuronal cell adhesion molecule isoform X2 [Apis mellifera]	-	-	-	-	-	GO:0005515//protein binding	-
ame-miR-1-3p	XM_006560988.3	237	258	-16.99	gCCTTACAGTCTTATAAACTta	x|||||||x|x:|x:|x||:xx	tGGAATGTAAAGAAGTATGGag	--	XP_006561051.1 uncharacterized protein LOC102655520 isoform X1 [Apis mellifera]	-	-	-	-	-	-	-
ame-miR-1-3p	XM_006560989.3	237	258	-16.99	gCCTTACAGTCTTATAAACTta	x|||||||x|x:|x:|x||:xx	tGGAATGTAAAGAAGTATGGag	--	XP_006561052.1 uncharacterized protein LOC102655520 isoform X2 [Apis mellifera]	-	-	-	-	-	-	-
ame-miR-1-3p	XM_006560990.3	237	258	-16.99	gCCTTACAGTCTTATAAACTta	x|||||||x|x:|x:|x||:xx	tGGAATGTAAAGAAGTATGGag	--	XP_006561053.1 uncharacterized protein LOC102655520 isoform X3 [Apis mellifera]	-	-	-	-	-	-	-
ame-miR-1-3p	XM_006560991.3	237	258	-16.99	gCCTTACAGTCTTATAAACTta	x|||||||x|x:|x:|x||:xx	tGGAATGTAAAGAAGTATGGag	--	XP_006561054.1 uncharacterized protein LOC102655520 isoform X4 [Apis mellifera]	-	-	-	-	-	-	-
ame-miR-1-3p	XM_006560996.3	74	94	-17.31	aCCTTACACAACA-CATCTCaa	x|||||||xxx|xx|||x:|xx	tGGAATGTAAAGAAGTATGGag	--	XP_006561059.1 uncharacterized protein LOC725988 [Apis mellifera]	-	-	-	-	GO:0016020//membrane	-	-
ame-miR-1-3p	XM_006561069.3	518	539	-17.13	tCCTTACATTGCATagcgatag	x|||||||||x|x|xxxxxxxx	tGGAATGTAAAGAAgtatggag	tal1	XP_006561132.1 uncharacterized protein LOC725127 isoform X1 [Apis mellifera]	-	-	-	-	-	GO:0046983//protein dimerization activity	-
ame-miR-1-3p	XM_006561163.3	1943	1963	-16.9	aCCTTACAATT-TTCGCACatg	x|||||||x||x|||:x||xxx	tGGAATGTAAAGAAGTATGgag	P65-C	XP_006561226.1 synaptotagmin-6 isoform X1 [Apis mellifera]	-	-	-	-	-	-	-
ame-miR-1-3p	XM_006561164.3	1943	1963	-16.9	aCCTTACAATT-TTCGCACatg	x|||||||x||x|||:x||xxx	tGGAATGTAAAGAAGTATGgag	P65-C	XP_006561226.1 synaptotagmin-6 isoform X1 [Apis mellifera]	-	-	-	-	-	-	-
ame-miR-1-3p	XM_006561166.3	1943	1963	-16.9	aCCTTACAATT-TTCGCACatg	x|||||||x||x|||:x||xxx	tGGAATGTAAAGAAGTATGgag	P65-C	XP_006561229.1 synaptotagmin-5 isoform X2 [Apis mellifera]	-	-	-	-	-	-	-
ame-miR-1-3p	XM_006561295.3	2213	2238	-11.94	tCCTTACATGAAATTTTTTTTttttt	x||||||||xxxx||:||:x|xxxxx	tGGAATGTA----AAGAAGTAtggag	--	XP_006561358.2 fibrillin-2 isoform X1 [Apis mellifera]	Environmental Information Processing	Signal transduction	ko04350//TGF-beta signaling pathway	K06825	-	GO:0005509//calcium ion binding	-
ame-miR-1-3p	XM_006561296.3	318	340	-21.19	tCCTTACAATTTCTTCTTACgat	x|||||||x|||||||x|||xxx	tGGAATGT-AAAGAAGTATGgag	--	XP_006561359.2 fibrillin-2 isoform X3 [Apis mellifera]	Environmental Information Processing	Signal transduction	ko04350//TGF-beta signaling pathway	K06825	-	GO:0005509//calcium ion binding	-
ame-miR-1-3p	XM_006561398.3	916	936	-13.06	tCCTTACATAGGT-CACATTat	x||||||||xxx|x||x|::xx	tGGAATGTAAAGAAGTATGGag	Dnajb12	XP_003697851.1 dnaJ homolog subfamily B member 12 [Apis florea]	Genetic Information Processing	Folding, sorting and degradation	ko04141//Protein processing in endoplasmic reticulum	K09518	-	GO:0004640//phosphoribosylanthranilate isomerase activity;GO:0005515//protein binding	GO:0006457//protein folding;GO:0006568//tryptophan metabolic process;GO:0009408//response to heat;GO:0031214//biomineral tissue development
ame-miR-1-3p	XM_006561450.3	366	387	-13.98	aCCTTACAcggataacctaata	x|||||||xxxxxxxxxxxxxx	tGGAATGTaaagaagtatggag	DDX17	XP_003691490.1 DEAD-box ATP-dependent RNA helicase 20 [Apis florea]	Human Diseases;Human Diseases;Genetic Information Processing	Cancers;Cancers;Transcription	ko05205//Proteoglycans in cancer;ko05202//Transcriptional misregulation in cancers;ko03040//Spliceosome	K12823;K12823;K12823	GO:0005672//transcription factor TFIIA complex;GO:0009380//excinuclease repair complex	GO:0003676//nucleic acid binding;GO:0003690//double-stranded DNA binding;GO:0004003//ATP-dependent DNA helicase activity;GO:0004386//helicase activity;GO:0005515//protein binding;GO:0005524//ATP binding;GO:0008026//ATP-dependent helicase activity;GO:0009381//excinuclease ABC activity;GO:0016887//ATPase activity	GO:0006139//nucleobase-containing compound metabolic process;GO:0006268//DNA unwinding involved in DNA replication;GO:0006281//DNA repair;GO:0006289//nucleotide-excision repair;GO:0006310//DNA recombination;GO:0006367//transcription initiation from RNA polymerase II promoter;GO:0043571//maintenance of CRISPR repeat elements
ame-miR-1-3p	XM_006561537.3	279	300	-10.13	tCCTTACATaaaaaaaagaaac	x||||||||xxxxxxxxxxxxx	tGGAATGTAaagaagtatggag	para	XP_006561600.1 sodium channel protein paralytic isoform X24 [Apis mellifera]	Organismal Systems	Sensory system	ko04742//Taste transduction	K04834	GO:0001518//voltage-gated sodium channel complex;GO:0016020//membrane	GO:0005216//ion channel activity;GO:0005248//voltage-gated sodium channel activity	GO:0006811//ion transport;GO:0006814//sodium ion transport;GO:0055085//transmembrane transport
ame-miR-1-3p	XM_006561539.3	279	300	-10.13	tCCTTACATaaaaaaaagaaac	x||||||||xxxxxxxxxxxxx	tGGAATGTAaagaagtatggag	para	XP_006561602.1 sodium channel protein paralytic isoform X25 [Apis mellifera]	Organismal Systems	Sensory system	ko04742//Taste transduction	K04834	GO:0001518//voltage-gated sodium channel complex;GO:0016020//membrane	GO:0005216//ion channel activity;GO:0005248//voltage-gated sodium channel activity	GO:0006811//ion transport;GO:0006814//sodium ion transport;GO:0055085//transmembrane transport
ame-miR-1-3p	XM_006561540.3	279	300	-10.13	tCCTTACATaaaaaaaagaaac	x||||||||xxxxxxxxxxxxx	tGGAATGTAaagaagtatggag	para	XP_006561603.1 sodium channel protein paralytic isoform X26 [Apis mellifera]	Organismal Systems	Sensory system	ko04742//Taste transduction	K04834	GO:0001518//voltage-gated sodium channel complex;GO:0016020//membrane	GO:0005216//ion channel activity;GO:0005248//voltage-gated sodium channel activity	GO:0006811//ion transport;GO:0006814//sodium ion transport;GO:0055085//transmembrane transport
ame-miR-1-3p	XM_006561541.3	279	300	-10.13	tCCTTACATaaaaaaaagaaac	x||||||||xxxxxxxxxxxxx	tGGAATGTAaagaagtatggag	para	XP_006561604.1 sodium channel protein paralytic isoform X28 [Apis mellifera]	Organismal Systems	Sensory system	ko04742//Taste transduction	K04834	GO:0001518//voltage-gated sodium channel complex;GO:0016020//membrane	GO:0005216//ion channel activity;GO:0005248//voltage-gated sodium channel activity	GO:0006811//ion transport;GO:0006814//sodium ion transport;GO:0055085//transmembrane transport
ame-miR-1-3p	XM_006561544.3	279	300	-10.13	tCCTTACATaaaaaaaagaaac	x||||||||xxxxxxxxxxxxx	tGGAATGTAaagaagtatggag	para	XP_006561607.1 sodium channel protein paralytic isoform X30 [Apis mellifera]	Organismal Systems	Sensory system	ko04742//Taste transduction	K04834	GO:0001518//voltage-gated sodium channel complex;GO:0016020//membrane	GO:0005216//ion channel activity;GO:0005248//voltage-gated sodium channel activity	GO:0006811//ion transport;GO:0006814//sodium ion transport;GO:0055085//transmembrane transport
ame-miR-1-3p	XM_006561545.3	279	300	-10.13	tCCTTACATaaaaaaaagaaac	x||||||||xxxxxxxxxxxxx	tGGAATGTAaagaagtatggag	para	XP_006561608.1 sodium channel protein paralytic isoform X35 [Apis mellifera]	Organismal Systems	Sensory system	ko04742//Taste transduction	K04834	GO:0001518//voltage-gated sodium channel complex;GO:0016020//membrane	GO:0005216//ion channel activity;GO:0005248//voltage-gated sodium channel activity	GO:0006811//ion transport;GO:0006814//sodium ion transport;GO:0055085//transmembrane transport
ame-miR-1-3p	XM_006561546.3	903	924	-19.53	aCCTTACATTTTTTTtcgaaca	x||||||||||:||:xxxxxxx	tGGAATGTAAAGAAGtatggag	rxraa	NP_001011634.1 ultraspiracle [Apis mellifera]	Cellular Processes	Cell growth and death	ko04214//Apoptosis - fly	K14030	-	GO:0003700//transcription factor activity, sequence-specific DNA binding;GO:0008270//zinc ion binding;GO:0043565//sequence-specific DNA binding	GO:0006355//regulation of transcription, DNA-templated
ame-miR-1-3p	XM_006561547.3	903	924	-19.53	aCCTTACATTTTTTTtcgaaca	x||||||||||:||:xxxxxxx	tGGAATGTAAAGAAGtatggag	rxraa	NP_001011634.1 ultraspiracle [Apis mellifera]	Cellular Processes	Cell growth and death	ko04214//Apoptosis - fly	K14030	-	GO:0003700//transcription factor activity, sequence-specific DNA binding;GO:0008270//zinc ion binding;GO:0043565//sequence-specific DNA binding	GO:0006355//regulation of transcription, DNA-templated
ame-miR-1-3p	XM_006561548.3	903	924	-19.53	aCCTTACATTTTTTTtcgaaca	x||||||||||:||:xxxxxxx	tGGAATGTAAAGAAGtatggag	rxraa	NP_001011634.1 ultraspiracle [Apis mellifera]	Cellular Processes	Cell growth and death	ko04214//Apoptosis - fly	K14030	-	GO:0003700//transcription factor activity, sequence-specific DNA binding;GO:0008270//zinc ion binding;GO:0043565//sequence-specific DNA binding	GO:0006355//regulation of transcription, DNA-templated
ame-miR-1-3p	XM_006561549.3	903	924	-19.53	aCCTTACATTTTTTTtcgaaca	x||||||||||:||:xxxxxxx	tGGAATGTAAAGAAGtatggag	rxraa	NP_001011634.1 ultraspiracle [Apis mellifera]	Cellular Processes	Cell growth and death	ko04214//Apoptosis - fly	K14030	-	GO:0003700//transcription factor activity, sequence-specific DNA binding;GO:0008270//zinc ion binding;GO:0043565//sequence-specific DNA binding	GO:0006355//regulation of transcription, DNA-templated
ame-miR-1-3p	XM_006561550.3	903	924	-19.53	aCCTTACATTTTTTTtcgaaca	x||||||||||:||:xxxxxxx	tGGAATGTAAAGAAGtatggag	rxraa	NP_001011634.1 ultraspiracle [Apis mellifera]	Cellular Processes	Cell growth and death	ko04214//Apoptosis - fly	K14030	-	GO:0003700//transcription factor activity, sequence-specific DNA binding;GO:0008270//zinc ion binding;GO:0043565//sequence-specific DNA binding	GO:0006355//regulation of transcription, DNA-templated
ame-miR-1-3p	XM_006561856.3	1	22	-14.27	cCCTTACAGCTACTTTGCTACT--	x|||||||xx|x|||::x|||:xx	tGGAATGTAAA-GAAGT-ATGGag	vsx2	XP_006561919.1 visual system homeobox 2 isoform X1 [Apis mellifera]	-	-	-	-	-	GO:0003677//DNA binding	GO:0006355//regulation of transcription, DNA-templated
ame-miR-1-3p	XM_006561865.3	3508	3529	-12.31	aCCTTACATaagaaaaaaaaag	x||||||||xxxxxxxxxxxxx	tGGAATGTAaagaagtatggag	--	XP_006561928.1 cell adhesion molecule 2 isoform X2 [Apis mellifera]	-	-	-	-	-	-	-
ame-miR-1-3p	XM_006561972.3	848	869	-12.82	aCCTTACAacaagtgttacatt	x|||||||xxxxxxxxxxxxxx	tGGAATGTaaagaagtatggag	rad21	XP_003249994.1 double-strand-break repair protein rad21 homolog [Apis mellifera]	Cellular Processes	Cell growth and death	ko04110//Cell cycle	K06670	-	GO:0005515//protein binding	-
ame-miR-1-3p	XM_006562120.3	884	904	-16.79	tCCTTACAAG-CTTAGTGCTca	x|||||||xxx|||x:|:|:xx	tGGAATGTAAAGAAGTATGGag	chn	XP_006562183.2 protein charlatan isoform X2 [Apis mellifera]	-	-	-	-	GO:0016020//membrane	GO:0003674//molecular_function	GO:0033103//protein secretion by the type VI secretion system
ame-miR-1-3p	XM_006562254.3	2314	2334	-14.57	tCCTTACAAT-CTTCTTGTTag	x|||||||x|x||||x|:::xx	tGGAATGTAAAGAAGTATGGag	LCC5	XP_006562317.1 L-ascorbate oxidase [Apis mellifera]	-	-	-	-	-	GO:0005375//copper ion transmembrane transporter activity;GO:0005507//copper ion binding;GO:0016491//oxidoreductase activity	GO:0006825//copper ion transport;GO:0055114//oxidation-reduction process
ame-miR-1-3p	XM_006562535.3	201	223	-10.86	tCCTTACAAATTTTACAagtgaa	x|||||||xx|:||x||xxxxxx	tGGAATGTAAAGAA-GTatggag	Eya1	XP_006562598.1 eyes absent homolog 4 isoform X2 [Apis mellifera]	-	-	-	-	-	-	-
ame-miR-1-3p	XM_006562536.3	201	223	-10.86	tCCTTACAAATTTTACAagtgaa	x|||||||xx|:||x||xxxxxx	tGGAATGTAAAGAA-GTatggag	Eya1	XP_006562599.1 eyes absent homolog 4 isoform X5 [Apis mellifera]	-	-	-	-	-	-	-
ame-miR-1-3p	XM_006562668.3	1831	1852	-12.66	aCCTTACATcacaaacggatag	x||||||||xxxxxxxxxxxxx	tGGAATGTAaagaagtatggag	Dgkq	XP_006562731.1 diacylglycerol kinase theta isoform X1 [Apis mellifera]	Metabolism;Organismal Systems;Environmental Information Processing;Environmental Information Processing;Human Diseases;Metabolism;Metabolism	Global and overview maps;Development and regeneration;Signal transduction;Signal transduction;Cancers;Lipid metabolism;Lipid metabolism	ko01100//Metabolic pathways;ko04361//Axon regeneration;ko04072//Phospholipase D signaling pathway;ko04070//Phosphatidylinositol signaling system;ko05231//Choline metabolism in cancer;ko00564//Glycerophospholipid metabolism;ko00561//Glycerolipid metabolism	K00901;K00901;K00901;K00901;K00901;K00901;K00901	GO:0005575//cellular_component	GO:0001727//lipid kinase activity;GO:0004143//diacylglycerol kinase activity;GO:0016301//kinase activity	GO:0007165//signal transduction;GO:0007205//protein kinase C-activating G-protein coupled receptor signaling pathway;GO:0008150//biological_process;GO:0035556//intracellular signal transduction;GO:0071569//protein ufmylation
ame-miR-1-3p	XM_006562830.3	596	616	-15.51	tCCTTACATGTAAA-ATATCat	x||||||||x|xxxx|||:|xx	tGGAATGTAAAGAAGTATGGag	CHST11	XP_006562893.1 carbohydrate sulfotransferase 11 [Apis mellifera]	Metabolism	Glycan biosynthesis and metabolism	ko00532//Glycosaminoglycan biosynthesis - chondroitin sulfate / dermatan sulfate	K01017	GO:0016021//integral component of membrane	GO:0005515//protein binding;GO:0008146//sulfotransferase activity	-
ame-miR-1-3p	XM_006562831.3	596	616	-15.51	tCCTTACATGTAAA-ATATCat	x||||||||x|xxxx|||:|xx	tGGAATGTAAAGAAGTATGGag	CHST11	XP_006562893.1 carbohydrate sulfotransferase 11 [Apis mellifera]	Metabolism	Glycan biosynthesis and metabolism	ko00532//Glycosaminoglycan biosynthesis - chondroitin sulfate / dermatan sulfate	K01017	GO:0016021//integral component of membrane	GO:0005515//protein binding;GO:0008146//sulfotransferase activity	-
ame-miR-1-3p	XM_006562979.3	5189	5210	-13.99	gCCTTACAAGCTTGCAAAgttt	x|||||||xxx:|x||x|xxxx	tGGAATGTAAAGAAGTATggag	GBETA1	XP_006563042.1 guanine nucleotide-binding protein G(I)/G(S)/G(T) subunit beta-1 [Apis mellifera]	Human Diseases;Organismal Systems;Environmental Information Processing;Environmental Information Processing;Human Diseases;Human Diseases;Organismal Systems;Organismal Systems;Organismal Systems;Environmental Information Processing;Human Diseases;Organismal Systems;Human Diseases;Human Diseases;Organismal Systems;Organismal Systems;Organismal Systems;Organismal Systems;Organismal Systems;Organism…	Cancers;Nervous system;Signal transduction;Signal transduction;Infectious diseases;Infectious disease: viral;Nervous system;Nervous system;Environmental adaptation;Signal transduction;Infectious diseases;Immune system;Substance dependence;Substance dependence;Nervous system;Nervous system;Endocrine system;Nervous system;Sensory system;Sensory system	ko05200//Pathways in cancer;ko04728//Dopaminergic synapse;ko04151//PI3K-Akt signaling pathway;ko04014//Ras signaling pathway;ko05163//Human cytomegalovirus infection;ko05170//Human immunodeficiency virus 1 infection;ko04725//Cholinergic synapse;ko04723//Retrograde endocannabinoid signaling;ko04713//Circadian entrainment;ko04371//Apelin signaling pathway;ko05167//Kaposi sarcoma-associated herpesvi…	K04536;K04536;K04536;K04536;K04536;K04536;K04536;K04536;K04536;K04536;K04536;K04536;K04536;K04536;K04536;K04536;K04536;K04536;K04536;K04536	-	GO:0005515//protein binding	-
ame-miR-1-3p	XM_006562980.3	5189	5210	-13.99	gCCTTACAAGCTTGCAAAgttt	x|||||||xxx:|x||x|xxxx	tGGAATGTAAAGAAGTATggag	GBETA1	XP_006563042.1 guanine nucleotide-binding protein G(I)/G(S)/G(T) subunit beta-1 [Apis mellifera]	Human Diseases;Organismal Systems;Environmental Information Processing;Environmental Information Processing;Human Diseases;Human Diseases;Organismal Systems;Organismal Systems;Organismal Systems;Environmental Information Processing;Human Diseases;Organismal Systems;Human Diseases;Human Diseases;Organismal Systems;Organismal Systems;Organismal Systems;Organismal Systems;Organismal Systems;Organism…	Cancers;Nervous system;Signal transduction;Signal transduction;Infectious diseases;Infectious disease: viral;Nervous system;Nervous system;Environmental adaptation;Signal transduction;Infectious diseases;Immune system;Substance dependence;Substance dependence;Nervous system;Nervous system;Endocrine system;Nervous system;Sensory system;Sensory system	ko05200//Pathways in cancer;ko04728//Dopaminergic synapse;ko04151//PI3K-Akt signaling pathway;ko04014//Ras signaling pathway;ko05163//Human cytomegalovirus infection;ko05170//Human immunodeficiency virus 1 infection;ko04725//Cholinergic synapse;ko04723//Retrograde endocannabinoid signaling;ko04713//Circadian entrainment;ko04371//Apelin signaling pathway;ko05167//Kaposi sarcoma-associated herpesvi…	K04536;K04536;K04536;K04536;K04536;K04536;K04536;K04536;K04536;K04536;K04536;K04536;K04536;K04536;K04536;K04536;K04536;K04536;K04536;K04536	-	GO:0005515//protein binding	-
ame-miR-1-3p	XM_006563066.2	290	312	-14.5	aCCTTACAAATTCTTATTAaaaa	x|||||||xx|||||xx||xxxx	tGGAATGTA-AAGAAGTATggag	ACLY	XP_006563129.1 ATP-citrate synthase [Apis mellifera]	Metabolism;Metabolism	Global and overview maps;Carbohydrate metabolism	ko01100//Metabolic pathways;ko00020//Citrate cycle (TCA cycle)	K01648;K01648	-	GO:0003824//catalytic activity;GO:0003985//acetyl-CoA C-acetyltransferase activity;GO:0004774//succinate-CoA ligase activity;GO:0004775//succinate-CoA ligase (ADP-forming) activity;GO:0004776//succinate-CoA ligase (GDP-forming) activity;GO:0046912//transferase activity, transferring acyl groups, acyl groups converted into alkyl on transfer	GO:0006099//tricarboxylic acid cycle;GO:0046356//acetyl-CoA catabolic process
ame-miR-1-3p	XM_006563258.3	142	166	-14.72	aCCTTACAAAAGTCACTTT-TATCaa	x|||||||xxxx|xx|||:x||:|xx	tGGAATGT----AAAGAAGTATGGag	PAXIP1	XP_006563321.2 PAX-interacting protein 1 [Apis mellifera]	-	-	-	-	-	-	-
ame-miR-1-3p	XM_006563283.2	686	708	-17.86	aCCTTACAAGACTTACGTTCCac	x|||||||xxx|||x|:|x||xx	tGGAATGTAAAGAA-GTATGGag	CNOT3	XP_006610510.1 CCR4-NOT transcription complex subunit 3 [Apis dorsata]	Genetic Information Processing	Folding, sorting and degradation	ko03018//RNA degradation	K12580	GO:0005634//nucleus;GO:0019028//viral capsid;GO:0019031//viral envelope	GO:0005198//structural molecule activity	GO:0006355//regulation of transcription, DNA-templated
ame-miR-1-3p	XM_006563323.3	12547	12568	-11.16	aCCTTACAATagtaacaaaaaa	x|||||||x|xxxxxxxxxxxx	tGGAATGTAAagaagtatggag	Mblk-1	XP_006563386.2 mushroom body large-type Kenyon cell-specific protein 1 isoform X1 [Apis mellifera]	Cellular Processes	Cell growth and death	ko04214//Apoptosis - fly	K20015	-	GO:0003677//DNA binding	-
ame-miR-1-3p	XM_006563449.3	1013	1032	-17.62	aCCTTACATTT--TCAAAGCtt	x||||||||||xx|||x|x|xx	tGGAATGTAAAGAAGTATGGag	KCNIP4	XP_006563512.1 Kv channel-interacting protein 1 isoform X2 [Apis mellifera]	-	-	-	-	-	GO:0005509//calcium ion binding;GO:0005515//protein binding	-
ame-miR-1-3p	XM_006563451.3	1013	1032	-17.62	aCCTTACATTT--TCAAAGCtt	x||||||||||xx|||x|x|xx	tGGAATGTAAAGAAGTATGGag	KCNIP4	XP_006563514.1 Kv channel-interacting protein 2 isoform X4 [Apis mellifera]	-	-	-	-	-	GO:0005509//calcium ion binding;GO:0005515//protein binding	-
ame-miR-1-3p	XM_006563751.3	178	200	-17.27	aCCTTACAGTATGAACATACgtt	x|||||||x|x|xxx|||||xxx	tGGAATGTAA-AGAAGTATGgag	LRRFIP2	XP_006563814.1 leucine-rich repeat flightless-interacting protein 2 isoform X1 [Apis mellifera]	-	-	-	-	-	GO:0005524//ATP binding;GO:0008134//transcription factor binding;GO:0042803//protein homodimerization activity;GO:0070840//dynein complex binding	GO:0006355//regulation of transcription, DNA-templated;GO:0006606//protein import into nucleus;GO:0007059//chromosome segregation;GO:0030261//chromosome condensation
ame-miR-1-3p	XM_006563753.3	178	200	-17.27	aCCTTACAGTATGAACATACgtt	x|||||||x|x|xxx|||||xxx	tGGAATGTAA-AGAAGTATGgag	Lrrfip2	XP_006563816.1 leucine-rich repeat flightless-interacting protein 2 isoform X2 [Apis mellifera]	-	-	-	-	GO:0000445//THO complex part of transcription export complex;GO:0031514//motile cilium	GO:0005515//protein binding;GO:0005524//ATP binding;GO:0008134//transcription factor binding;GO:0008565//protein transporter activity;GO:0042803//protein homodimerization activity;GO:0051082//unfolded protein binding;GO:0070840//dynein complex binding	GO:0006355//regulation of transcription, DNA-templated;GO:0006397//mRNA processing;GO:0006457//protein folding;GO:0006606//protein import into nucleus;GO:0007059//chromosome segregation;GO:0030253//protein secretion by the type I secretion system;GO:0030261//chromosome condensation;GO:0048870//cell motility
ame-miR-1-3p	XM_006563943.3	787	811	-21.46	aCCTTACAGACTTGCTTTATcttct	x|||||||xxx||x|||:||xxxxx	tGGAATGT---AAAGAAGTAtggag	shep	XP_006564006.1 protein alan shepard isoform X3 [Apis mellifera]	-	-	-	-	-	GO:0003676//nucleic acid binding	GO:0008380//RNA splicing
ame-miR-1-3p	XM_006563944.3	787	811	-21.46	aCCTTACAGACTTGCTTTATcttct	x|||||||xxx||x|||:||xxxxx	tGGAATGT---AAAGAAGTAtggag	shep	XP_006564007.1 protein alan shepard isoform X4 [Apis mellifera]	-	-	-	-	-	GO:0003676//nucleic acid binding	GO:0008380//RNA splicing
ame-miR-1-3p	XM_006563945.3	787	811	-21.46	aCCTTACAGACTTGCTTTATcttct	x|||||||xxx||x|||:||xxxxx	tGGAATGT---AAAGAAGTAtggag	shep	XP_006564008.1 protein alan shepard isoform X5 [Apis mellifera]	-	-	-	-	-	GO:0003676//nucleic acid binding	GO:0008380//RNA splicing
ame-miR-1-3p	XM_006563947.3	787	811	-21.46	aCCTTACAGACTTGCTTTATcttct	x|||||||xxx||x|||:||xxxxx	tGGAATGT---AAAGAAGTAtggag	shep	XP_006564010.1 protein alan shepard isoform X6 [Apis mellifera]	-	-	-	-	-	GO:0003676//nucleic acid binding	GO:0008380//RNA splicing
ame-miR-1-3p	XM_006563948.3	787	811	-21.46	aCCTTACAGACTTGCTTTATcttct	x|||||||xxx||x|||:||xxxxx	tGGAATGT---AAAGAAGTAtggag	shep	XP_006564011.1 protein alan shepard isoform X7 [Apis mellifera]	-	-	-	-	-	GO:0003676//nucleic acid binding	GO:0008380//RNA splicing
ame-miR-1-3p	XM_006563949.3	787	811	-21.46	aCCTTACAGACTTGCTTTATcttct	x|||||||xxx||x|||:||xxxxx	tGGAATGT---AAAGAAGTAtggag	shep	XP_006564012.1 protein alan shepard isoform X8 [Apis mellifera]	-	-	-	-	-	GO:0003676//nucleic acid binding	GO:0008380//RNA splicing
ame-miR-1-3p	XM_006563950.3	787	811	-21.46	aCCTTACAGACTTGCTTTATcttct	x|||||||xxx||x|||:||xxxxx	tGGAATGT---AAAGAAGTAtggag	shep	XP_006564013.1 protein alan shepard isoform X9 [Apis mellifera]	-	-	-	-	-	GO:0003676//nucleic acid binding	GO:0008380//RNA splicing
ame-miR-1-3p	XM_006563951.3	787	811	-21.46	aCCTTACAGACTTGCTTTATcttct	x|||||||xxx||x|||:||xxxxx	tGGAATGT---AAAGAAGTAtggag	shep	XP_006564014.1 protein alan shepard isoform X10 [Apis mellifera]	-	-	-	-	-	GO:0003676//nucleic acid binding	GO:0008380//RNA splicing
ame-miR-1-3p	XM_006563952.3	787	811	-21.46	aCCTTACAGACTTGCTTTATcttct	x|||||||xxx||x|||:||xxxxx	tGGAATGT---AAAGAAGTAtggag	shep	XP_006564015.1 protein alan shepard isoform X11 [Apis mellifera]	-	-	-	-	-	GO:0003676//nucleic acid binding	GO:0008380//RNA splicing
ame-miR-1-3p	XM_006563953.3	787	811	-21.46	aCCTTACAGACTTGCTTTATcttct	x|||||||xxx||x|||:||xxxxx	tGGAATGT---AAAGAAGTAtggag	shep	XP_006564016.1 protein alan shepard isoform X12 [Apis mellifera]	-	-	-	-	-	GO:0003676//nucleic acid binding	GO:0008380//RNA splicing
ame-miR-1-3p	XM_006563954.3	787	811	-21.46	aCCTTACAGACTTGCTTTATcttct	x|||||||xxx||x|||:||xxxxx	tGGAATGT---AAAGAAGTAtggag	shep	XP_006564017.1 protein alan shepard isoform X13 [Apis mellifera]	-	-	-	-	-	GO:0003676//nucleic acid binding	GO:0008380//RNA splicing
ame-miR-1-3p	XM_006564070.1	9	29	-15.29	aCCTTACAGTAGTA-ATACatg	x|||||||x|xx|xx||||xxx	tGGAATGTAAAGAAGTATGgag	BTBD2	XP_006564133.1 BTB/POZ domain-containing protein 1 isoform X1 [Apis mellifera]	-	-	-	-	-	GO:0005515//protein binding	-
ame-miR-1-3p	XM_006564071.1	9	29	-15.29	aCCTTACAGTAGTA-ATACatg	x|||||||x|xx|xx||||xxx	tGGAATGTAAAGAAGTATGgag	BTBD2	XP_006564134.1 BTB/POZ domain-containing protein 1 isoform X2 [Apis mellifera]	-	-	-	-	-	GO:0005515//protein binding	-
ame-miR-1-3p	XM_006564123.3	456	477	-15.66	gCCTTACACCCTTTTAgctaac	x|||||||xxx:||:|xxxxxx	tGGAATGTAAAGAAGTatggag	Myef2	XP_006564186.1 heterogeneous nuclear ribonucleoprotein M isoform X1 [Apis mellifera]	-	-	-	-	GO:0019013//viral nucleocapsid	GO:0003676//nucleic acid binding;GO:0003723//RNA binding	GO:0008380//RNA splicing
ame-miR-1-3p	XM_006564182.3	1076	1101	-14.73	aCCTTACAATATGCAATTCATGgaac	x|||||||x|x|x|xx|||||:xxxx	tGGAATGTAA-A-G--AAGTATggag	Psn	XP_006564243.2 presenilin-1 [Apis mellifera]	Human Diseases;Human Diseases;Environmental Information Processing;Organismal Systems;Organismal Systems;Environmental Information Processing	Neurodegenerative diseases;Infectious diseases;Signal transduction;Development and regeneration;Nervous system;Signal transduction	ko05010//Alzheimer disease;ko05165//Human papillomavirus infection;ko04310//Wnt signaling pathway;ko04361//Axon regeneration;ko04722//Neurotrophin signaling pathway;ko04330//Notch signaling pathway	K04505;K04505;K04505;K04505;K04505;K04505	GO:0016021//integral component of membrane	GO:0004190//aspartic-type endopeptidase activity	GO:0016485//protein processing
ame-miR-1-3p	XM_006564184.3	1073	1098	-14.73	aCCTTACAATATGCAATTCATGgaac	x|||||||x|x|x|xx|||||:xxxx	tGGAATGTAA-A-G--AAGTATggag	Psn	XP_006564243.2 presenilin-1 [Apis mellifera]	Human Diseases;Human Diseases;Environmental Information Processing;Organismal Systems;Organismal Systems;Environmental Information Processing	Neurodegenerative diseases;Infectious diseases;Signal transduction;Development and regeneration;Nervous system;Signal transduction	ko05010//Alzheimer disease;ko05165//Human papillomavirus infection;ko04310//Wnt signaling pathway;ko04361//Axon regeneration;ko04722//Neurotrophin signaling pathway;ko04330//Notch signaling pathway	K04505;K04505;K04505;K04505;K04505;K04505	GO:0016021//integral component of membrane	GO:0004190//aspartic-type endopeptidase activity	GO:0016485//protein processing
[truncated: 669 more rows]

## Sheet: ame-miR-12-5p
miRNA	target	target_start	target_end	energy(kcal/mol)	target_region(3'->5')	mirna-target_pairing(5'->3')	miRNA_sequence(5'->3')	Symbol	Description	KEGG_A_class	KEGG_B_class	Pathway	K_ID	GO Component	GO Function	GO Process
[truncated: 1,003 more rows]

[truncated: 3 more sheets: ame-miR-375-3p, ame-miR-9a-5p, ame-miR-263a-5p]
